# Supplementary material
Source: Royal Society of Chemistry journal article supplement (doi:10.1039/d6qo00511j)
Supplement: d6qo00511j1.pdf [file d6qo00511j1.pdf]

## **Pd-Catalyzed Stereoselective Enol Ether Coupling toward C2-Branched Carbohydrates: Experimental and Computational Insights into Glycal-Controlled Diastereoselectivity**

Ram Pratap Pandey<sup>∇,a</sup>, Bindu Tiwari<sup>∇,a</sup>, Mursaleem Ansari<sup>\*b,c</sup> and Nazar Hussain<sup>\*a</sup>

---

- a) Department of Medicinal Chemistry,  
Institute of Medical Sciences,  
Banaras Hindu University, Varanasi-221005  
E-mail: [nazar.hussain10@gmail.com](mailto:nazar.hussain10@gmail.com), [nazar10@bhu.ac.in](mailto:nazar10@bhu.ac.in)
- b) Department of Chemistry,  
Indian Institute of Technology Bombay, Mumbai 400076, India.  
E-mail: [mansaribhu@gmail.com](mailto:mansaribhu@gmail.com)
- c) Institut de Química Computacional i Catàlisi and Department of Chemistry,  
University of Girona, 17003 Girona, Spain

<sup>∇</sup>Both authors contributed equally to this work.

## Table of Contents

|                                                                             |           |
|-----------------------------------------------------------------------------|-----------|
| 1. General Consideration.....                                               | S2        |
| 2. Experimental procedures for all products.....                            | S2-S3     |
| 3. 2D-NMR analysis.....                                                     | S3-S4     |
| 4. Computational Details.....                                               | S4-S6     |
| 5. Computational study on Pd(OAc) <sub>2</sub> as an active catalyst.....   | S6-S9     |
| 6. Computational Details on Pd(DMF) <sub>2</sub> as an active catalyst..... | S10-S23   |
| 7. Cartesian coordinates.....                                               | S24-98    |
| 8. Characterization data.....                                               | S99-S106  |
| 9. NMR Spectra.....                                                         | S107-S139 |

### **1. General Consideration**

Unless otherwise noted, all reactions were performed under an N<sub>2</sub> atmosphere in a dry solvent, and all glassware was oven-dried before use. All commercially available reagents were purchased from commercial sources and were used without further purification. All reactions were monitored using thin-layer chromatography over silica gel-coated TLC plates. The products were purified by column chromatography on silica gel (100-200 mesh) using petroleum ether–ethyl acetate as the eluent to obtain the pure products. <sup>1</sup>H and <sup>13</sup>C NMR spectra were recorded using 500 and 600 to 126 and 151 MHz spectrometers with TMS as internal standards. All products exact masses were derived using HRMS having a QTOF analyzer. Data is reported in ppm using CDCl<sub>3</sub> as the solvent unless otherwise specified. Data is reported as: Chemical shifts (δ), multiplicity (s = singlet, d = doublet, t = triplet, q = quartet, m = multiple, br = broad), coupling constants (Hz), integrated intensity. Structural assignments were made with additional information from COSY, HMBC, HSQC, and NOESY experiments. Commercially available grades of organic solvents of adequate purity are used in all reactions.

## **2. Experimental procedures for all products**

### **1) General procedure 1 for the products (4a-4l, 7).**

In an oven-dried round bottom flask, 2-iodo glucal **2a** (0.13 mmol, 1.0 equiv.), PdCl<sub>2</sub>(0.013 mmol, 10 mol %), AgOAc (0.26 mmol, 2.0 equiv.) was dissolved in 2 mL of dry DMF and the reaction mixture was stirred at 90 °C for 4 hours. After the starting material was converted as confirmed through TLC, the organic layer was extracted with EtOAc (10 × 3 ml). The organic layer was dried over sodium sulfate, and the remaining residue was purified by column chromatography over silica gel (100-200 mesh) using hexane/ethyl acetate as eluent.

### **2) General procedure 2 for the products (8).**

In an oven-dried round bottom flask prepared compound **4e** (0.14 mmol, 1.0 equiv.), was dissolved in CH<sub>3</sub>CN/EtOAc/H<sub>2</sub>O (3:3:1 ratio) at 0 °C, and RuCl<sub>3</sub> (0.0070 mmol, 5 mol%) was added at 0 °C. After that, NaIO<sub>4</sub> (0.21 mmol, 1.5 equiv.) was added at the same temperature and the reaction mixture was stirred for 2 h. After the starting material was converted as confirmed through TLC, the organic layer was extracted with EtOAc (10 × 3 mL). The combined organic layers were dried (Na<sub>2</sub>SO<sub>4</sub>), evaporated, and the residue left was purified by column chromatography over silica gel (100–200 mesh) using hexane/ethyl acetate as eluent.

### **3) General procedure 3 for the products (9, 10).**

In an oven-dried round bottom flask prepared compound **4e** (0.14 mmol, 1.0 equiv.), was dissolved in 2 mL of dry DCM under N<sub>2</sub> atmosphere and respective TMSN<sub>3</sub> (0.16 mmol, 1.2 equiv.) was added. To this solution BF<sub>3</sub>·OEt<sub>2</sub> (0.14 mmol, 1.0 equiv.) was added slowly and the reaction mixture was stirred at the room temperature for 2 hours. After the starting material was converted as confirmed through TLC, the mixture was quenched with a saturated sodium bicarbonate solution (10 mL), and the organic layer was extracted with DCM (10 × 3 ml). The organic layer was dried over sodium sulfate, and the remaining residue was purified by column chromatography over silica gel (100-200 mesh) using hexane/ethyl acetate as eluent.

## **3. 2D - NMR Analysis of Compound 4e**

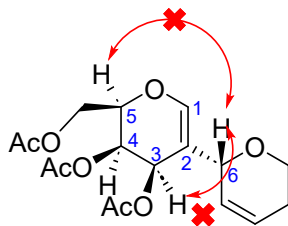

**Fig1.:** NOESY correlation analysis of **4e**

**Table S1: NOESY Correlations of 4e**

|     | <sup>1</sup> H                         | <sup>1</sup> H                                                                |
|-----|----------------------------------------|-------------------------------------------------------------------------------|
| H-1 | 6.53 (s, 1H)                           | -                                                                             |
| H-3 | 4.25 (dd, <i>J</i> = 7.8, 3.3 Hz, 1H)  | 5.37 – 5.31 (m, 1H), 4.30 (dd, <i>J</i> = 11.3, 8.1 Hz, 1H)                   |
| H-4 | 5.37 – 5.31 (m, 1H)                    | 4.25 (dd, <i>J</i> = 7.8, 3.3 Hz, 1H), 4.30 (dd, <i>J</i> = 11.3, 8.1 Hz, 1H) |
| H-5 | 4.30 (dd, <i>J</i> = 11.3, 8.1 Hz, 1H) | 5.37 – 5.31 (m, 1H), 4.25 (dd, <i>J</i> = 7.8, 3.3 Hz, 1H)                    |
| H-6 | 5.63 d, <i>J</i> = 4.5 Hz, 1H)         | -                                                                             |

#### 4. Computational details

Geometry optimizations were performed using the hybrid B3LYP density functional augmented with Grimme's D3 dispersion correction (B3LYP-D3), as implemented in the Gaussian 09 program.<sup>1-5</sup> Solvation effects were treated using the SMD continuum solvation model.<sup>6</sup> The 6-31G\*\* basis set was employed for C, H, and O atoms,<sup>7</sup> while the SDD<sup>8</sup> effective core potential and corresponding basis set were used for Pd and I atoms. Harmonic vibrational frequency analyses were carried out at the same level of theory to characterize all stationary points as either minima (no imaginary frequencies) or transition states (one imaginary frequency). The Gibbs free energy of solutes in the liquid phase is calculated as:

$$G_{\text{liq}} = E_{\text{sp}} + G_{\text{ther}} + \Delta G_{\text{sol}}$$

Single-point energy refinements were subsequently performed at the PBE0-D3(BJ)/def2-TZVPD level using the Gaussian 16 package.<sup>9,10</sup> For thermodynamic calculations, all positive vibrational frequencies below 100 cm<sup>-1</sup> were set to 100 cm<sup>-1</sup>.<sup>11</sup> Total Gibbs free energies were obtained by combining electronic energies with thermal corrections to Gibbs free energy at the experimental temperature. Solvation free energies ( $\Delta G_{\text{sol}}$ ) were calculated at the M05-2X/6-31G\* level of theory.<sup>12</sup>

1. Frisch, M. J.; Trucks, G. W.; Schlegel, H. B.; Scuseria, G. E.; Robb, M. A.; Cheeseman, J. R.; Scalmani, G.; Barone, V.; Mennucci, B.; Petersson, G. A.; Nakatsuji, H.; Caricato, M.; Li, X.; Hratchian, H. P.; Izmaylov, A. F.; Bloino, J.; Zheng, G.; Sonnenberg, J. L.; Hada, M.; Ehara, M.; Toyota, K.; Fukuda, R.; Hasegawa, J.; Ishida, M.; Nakajima, T.; Honda, Y.; Kitao, O.; Nakai, H.; Vreven, T.; Montgomery, J. A., Jr.; Peralta, J. E.; Ogliaro, F.; Bearpark, M.; Heyd, J. J.; Brothers, E.; Kudin, K. N.; Staroverov, V. N.; Kobayashi, R.; Normand, J.; Raghavachari, K.; Rendell, A.; Burant, J. C.; Iyengar, S. S.; Tomasi, J.; Cossi, M.; Rega, N.; Millam, M. J.; Klene, M.; Knox, J. E.; Cross, J. B.; Bakken, V.; Adamo, C.; Jaramillo, J.; Gomperts, R.; Stratmann, R. E.; Yazyev, O.; Austin, A. J.; Cammi, R.; Pomelli, C.; Ochterski, J. W.; Martin, R. L.; Morokuma, K.; Zakrzewski, V. G.; Voth, G. A.; Salvador, P.; Dannenberg, J. J.; Dapprich, S.; Daniels, A. D.; Farkas, O.; Foresman, J. B.; Ortiz, J. V.; Cioslowski, J.; Fox, D. J. *Gaussian09, Revision D.01*; Gaussian, Inc.: Wallingford, CT, **2013**.
2. M. J. Frisch, G. W. Trucks, H. B. Schlegel, G. E. Scuseria, M. A. Robb, J. R. Cheeseman, G. Scalmani, V. Barone, G. A. Petersson, H. Nakatsuji, X. Li, M. Caricato, A. V. Marenich, J. Bloino, B. G. Janesko, R. Gomperts, B. Mennucci, H. P. Hratchian, J. V. Ortiz, A. F. Izmaylov, J. L. Sonnenberg, D. Williams-Young, F. Ding, F. Lipparini, F. Egidi, J. Goings, B. Peng, A. Petrone, T. Henderson, D. Ranasinghe, V. G. Zakrzewski, J. Gao, N. Rega, G. Zheng, W. Liang, M. Hada, M. Ehara, K. Toyota, R. Fukuda, J. Hasegawa, M. Ishida, T. Nakajima, Y. Honda, O. Kitao, H. Nakai, T. Vreven, K. Throssell, J. A. Montgomery, Jr., J. E. Peralta, F. Ogliaro, M. J. Bearpark, J. J. Heyd, E. N. Brothers, K. N. Kudin, V. N. Staroverov, T. A. Keith, R. Kobayashi, J. Normand, K. Raghavachari, A. P. Rendell, J. C. Burant, S. S. Iyengar, J. Tomasi, M. Cossi, J. M. Millam, M. Klene, C. Adamo, R. Cammi, J. W. Ochterski, R. L. Martin, K. Morokuma, O. Farkas, J. B. Foresman, and D. J. Fox, *Gaussian 16, Revision B.01*; Gaussian, Inc.: Wallingford CT, **2016**.
3. Becke, A. D. Density-functional thermochemistry. III. The role of exact exchange. *J. Chem. Phys.* 1993, **98**, 5648-5652.
4. Lee, C., Yang, W. & Parr, R. G. Development of the Colle-Salvetti correlation-energy formula into a functional of the electron density. *Phys. Rev B.* 1988, **37**, 785-789.
5. Grimme, S., Antony, J., Ehrlich, S. & Krieg, H. A consistent and accurate ab initio parametrization of density functional dispersion correction (DFT-D) for the 94 elements H-Pu. *J. Chem. Phys.* 2010, **132**, 154104.
6. A. V. Marenich, C. J. Cramer and D. G. Truhlar, *J. Phys. Chem. B*, 2009, **113**, 6378–6396.
7. (a) W. J. Hehre, R. Ditchfeld and J. A. Pople, *J. Chem. Phys.*, 1972, **56**, 2257–2261; (b) P. C. Hariharan and J. A. Pople, *Theor. Chim. Acta*, 1973, **28**, 213–222; (c) C. Lee, W. Yang and R. G. Parr, *Phys. Rev. B: Condens. Matter Mater. Phys.*, 1988, **37**, 785–789; (d) A. D. Becke, *J. Chem. Phys.*, 1993, **98**, 5648–5652.
8. (a) D. Andrae, U. Haussermann, M. Dolg, H. Stoll and H. Preuss, *Theor. Chim. Acta*, 1990, **77**, 123–141; (b) P. Fuentealba, H. Stoll, L. von Szentpály, P. Schwerdtfeger and H. Preuss, *J. Phys. B: At., Mol. Opt. Phys.*, 1983, **16**, L323–L328; (c) P. J. Hay and W. R. Wadt, *J. Chem. Phys.*, 1985, **82**, 270–283; (d) P. J. Hay and W. R. Wadt, *J. Chem. Phys.*, 1985, **82**, 299–310.

9. Weigend, F. & Ahlrichs, R. Balanced basis sets of split valence, triple zeta valence and quadruple zeta valence quality for H to Rn: Design and assessment of accuracy. *Phys. Chem. Chem. Phys.* 2005, **7**, 3297-3305.
10. Weigend, F. Accurate Coulomb-fitting basis sets for H to Rn. *Phys. Chem. Chem. Phys.* 2006, **8**, 1057-1065.
11. Lu, T. & Chen, Q. Shermo: A general code for calculating molecular thermochemistry properties. *Comput. Theor. Chem.* 2021, **1200**, 113249.
12. Ho, J., Klamt, A. & Coote, M. L. Comment on the Correct Use of Continuum Solvent Models. *J. Phys. Chem. A* 2010, **114**, 13442-13444.

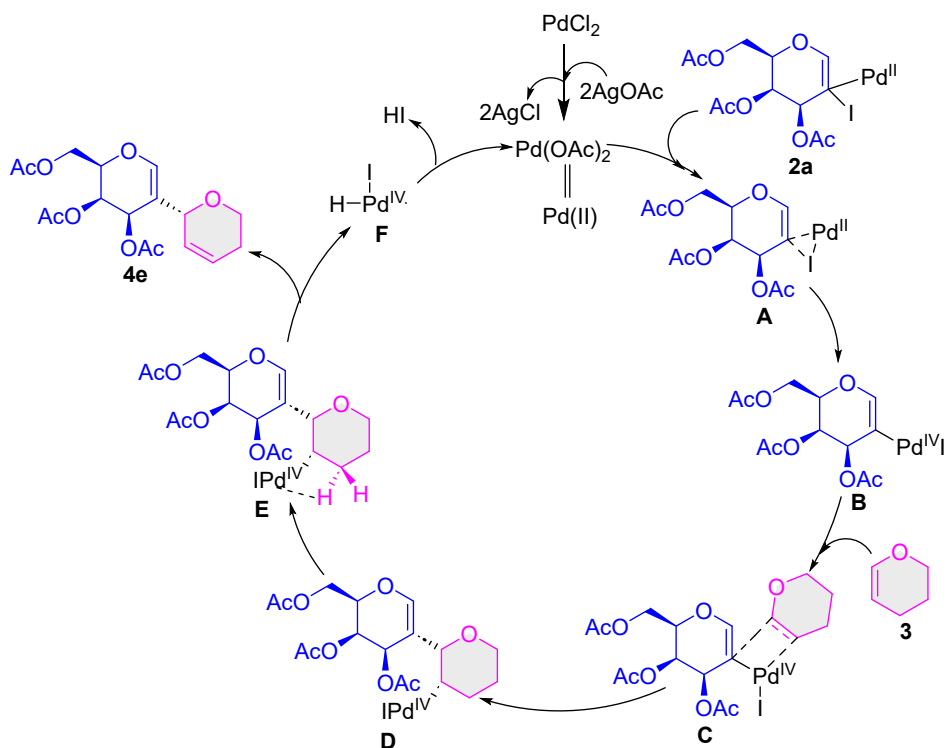

## 5. Computational study on Pd(OAc)<sub>2</sub> as an active catalyst.

**Scheme S1.** Proposed mechanism for the C–C coupling leading to the formation of **4e** via a Pd(II) catalyst.

Based on the control experiments and relevant literature precedents, a plausible reaction mechanism is proposed, as shown in Scheme S1. The transformation follows a classical Pd(II)/Pd(IV) catalytic method. Initial activation of PdCl<sub>2</sub> by AgOAc generates the catalytically active Pd(OAc)<sub>2</sub> species through removal of chloride as AgCl. The catalytic cycle is initiated by oxidative addition of the glucal iodide substrate to Pd(II), furnishing complex **B**. Coordination of the alkene partner to the resulting Pd(IV) center affords a  $\pi$ -complex **C**, which subsequently undergoes migratory insertion of the olefin into the Pd-glucal bond to generate the corresponding intermediate **D**. This intermediate undergoes  $\beta$ -hydride elimination to generate the functionalized product scaffold while forming a Pd-H species **E**. Finally, the Pd–I species reacts with hydride to form H–PdI (**F**), which is subsequently converted back into the active Pd(OAc)<sub>2</sub> species in the presence of AgOAc, thereby completing the catalytic cycle and delivering the desired product **4e**.

Based on the experimental observations, DFT calculations were performed to elucidate the origin of the stereoselective C–C bond formation using 2-iodoglucal (**1a** and **2a**) and dihydropyran (DHP, **3a**) as model substrates in DMF. Initially, PdCl<sub>2</sub> reacts with Ag(OAc)<sub>2</sub> to generate the active catalyst Pd(OAc)<sub>2</sub> *in situ* along with AgCl, with a calculated thermodynamic stabilization of –85.1 kcal/mol (Figure Sa). However, this species was taken as the reference point for constructing the potential energy surface of the C–C coupling reaction. Upon approach of 2-iodogalactal (**2a**) to Pd(OAc)<sub>2</sub>, intermediate **A**<sub>2a</sub> is formed; however, this step is substantially endergonic ( $\Delta G = 14.7$  kcal/mol) with an associated activation barrier of 13.8 kcal/mol. The coordination and oxidative addition steps are associated with a high energy barrier (28.5 kcal/mol) from the active catalyst, indicating that these steps are likely sluggish at 90 °C. Intermediate **A** then undergoes oxidative addition of substrate **2a** to generate species **B**<sub>2a</sub> with an energy barrier of 20.9 kcal/mol. We now turn to understanding the origin of the stereoselectivity in the C–C coupling product arising from

the approach of DHP to species **B<sub>2a</sub>**. Species **B<sub>2a</sub>** then reacts with DHP (**3a**), which can approach

from either the top (*re*) or bottom (*si*) face, leading to the formation of intermediates  $C_{2a}$  and  $C_{2a}'$ ,

respectively. Both pathways are thermodynamically feasible; however, approach from the bottom

face is slightly more favorable than from the top face. The C–C coupling transition states (**TS<sub>2aC-D</sub>**)

and  $\text{TS}_{2\text{aC}'\text{-D}}$ ) are nearly isoenergetic ( $\Delta G^\ddagger = 1.5$  and  $1.6$  kcal/mol for the top- and bottom-face

approaches, respectively), leading to formation of species  $\mathbf{D}_{2a}$  and  $\mathbf{D}_{2a}'$  with relative free energies

of 34.1 and 23.8 kcal/mol, respectively. In the next step, formation of a vacant coordination site on palladium leads to intermediates  $E_{2a}$  and  $E_{2a}'$ , which feature a three-atom, two-electron agostic interaction, with relative energies of 3.4 and 14.8 kcal/mol. The higher energy required to reorient  $E_{2a}'$  toward  $\beta$ -hydride elimination, relative to  $E_{2a}$ , indicates a less favorable pathway from  $E_{2a}'$ . The subsequent C–H activation proceeds *via* CMD transition states ( $TS_{2aE-F}$  and  $TS_{2aE'-F'}$ ) exhibit overall activation barriers of 1.7 and 2.7 kcal/mol, leading to the formation of species  $F_{2a}$  and  $F_{2a}'$

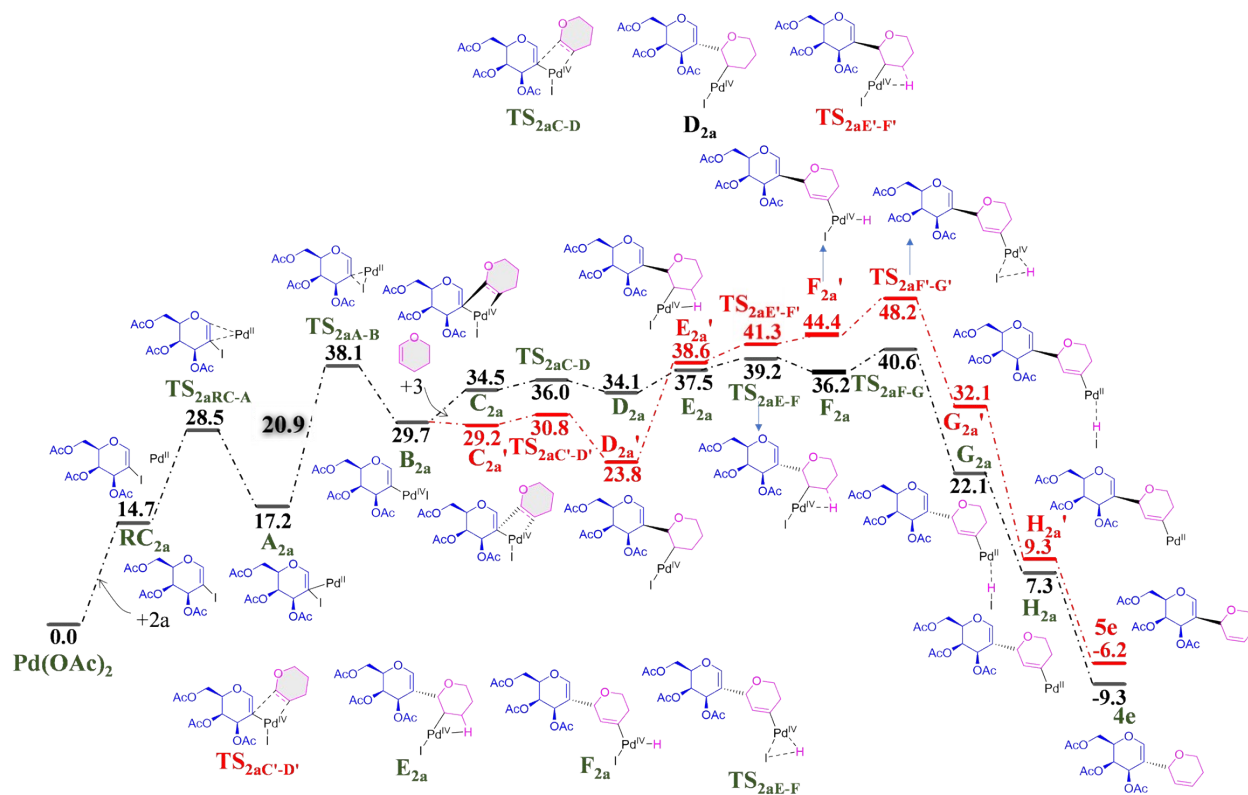

with relative free energies of 36.2 and 44.4 kcal/mol, respectively. In the final step, removal of HI from species  $F_{2a}$  and  $F_{2a}'$  (not formed during course of the reaction) proceeds *via* the corresponding transition states, leading to formation of the final product. The corresponding activation barriers for  $TS_{2aF-G}$  and  $TS_{2aF'-G'}$  are calculated to be 4.4 and 3.8 kcal/mol, affording the final products with relative free energies of -9.3 (**4e**) and -6.2 (**5e**) kcal/mol, respectively. Overall thermodynamic and kinetic considerations support preferential formation of product **4e** rather than **5e** (Figure Sa). Overall, the reaction pathway is both thermodynamically and kinetically energy demanding, with only the product-forming step being exergonic from the active species. This observation suggests that  $Pd(OAc)_2$  is unlikely to be the true active catalyst for the C–C coupling reaction.

**Figure Sa.** Free energy profiles for the Pd-catalyzed C-C coupling of 2-iodogalactal (**2a**) and DHP (**3a**). The relative free energies are given in kcal/mol.

Similarly, the potential energy surface (PES) for the stereoselective C–C bond formation was

computed using 2-iodoglucal (**1a**) and dihydropyran (DHP, **3a**) as model substrates in DMF, with

the active catalyst Pd(OAc)<sub>2</sub> generated *in situ* from PdCl<sub>2</sub> and AgOAc. DFT calculations reveal

that the transformation from  $\mathbf{RC}_{1a}$  to  $\mathbf{B}_{1a}$  proceeds *via* substrate coordination and subsequent

oxidative addition, with associated activation barriers of 15.8 and 28.7 kcal/mol, respectively (Figure Sb). The oxidative addition step is associated with a high energy barrier (23.0 kcal/mol) from the active catalyst, indicating that this step is likely to be sluggish at 90 °C. Species **B**<sub>1a</sub> reacts with DHP (**3a**) *via* top (*re*)- or bottom (*si*)-face approach to form intermediates **C**<sub>1a</sub> and **C**<sub>1a'</sub>, respectively. The corresponding C–C coupling transition states are nearly isoenergetic ( $\Delta G^\ddagger = 2.4$  and 3.9 kcal/mol), leading to species **D**<sub>1a</sub> and **D**<sub>1a'</sub> with relative free energies of 38.8 and 40.3 kcal/mol; however, these pathways are thermodynamically unfavorable relative to the corresponding C–C coupling transition states (Figure Sb). The computed activation barriers for  $\beta$ -hydride elimination from species **E**<sub>1a</sub> and **E**<sub>1a'</sub> to afford species **F**<sub>1a</sub> and **F**<sub>1a'</sub> are 0.3 and 6.5 kcal/mol. Finally, removal of HI from the corresponding species proceeds *via* the associated transition states to afford the final products, with activation barriers of 3.6 and 3.7 kcal/mol, respectively. The product energies are calculated to be  $-8.7$  and  $-9.6$  kcal/mol, indicating that the formation of both products from Pd(OAc)<sub>2</sub> is thermodynamically favorable. Overall, the process is both thermodynamically and kinetically highly energy demanding for product formation.

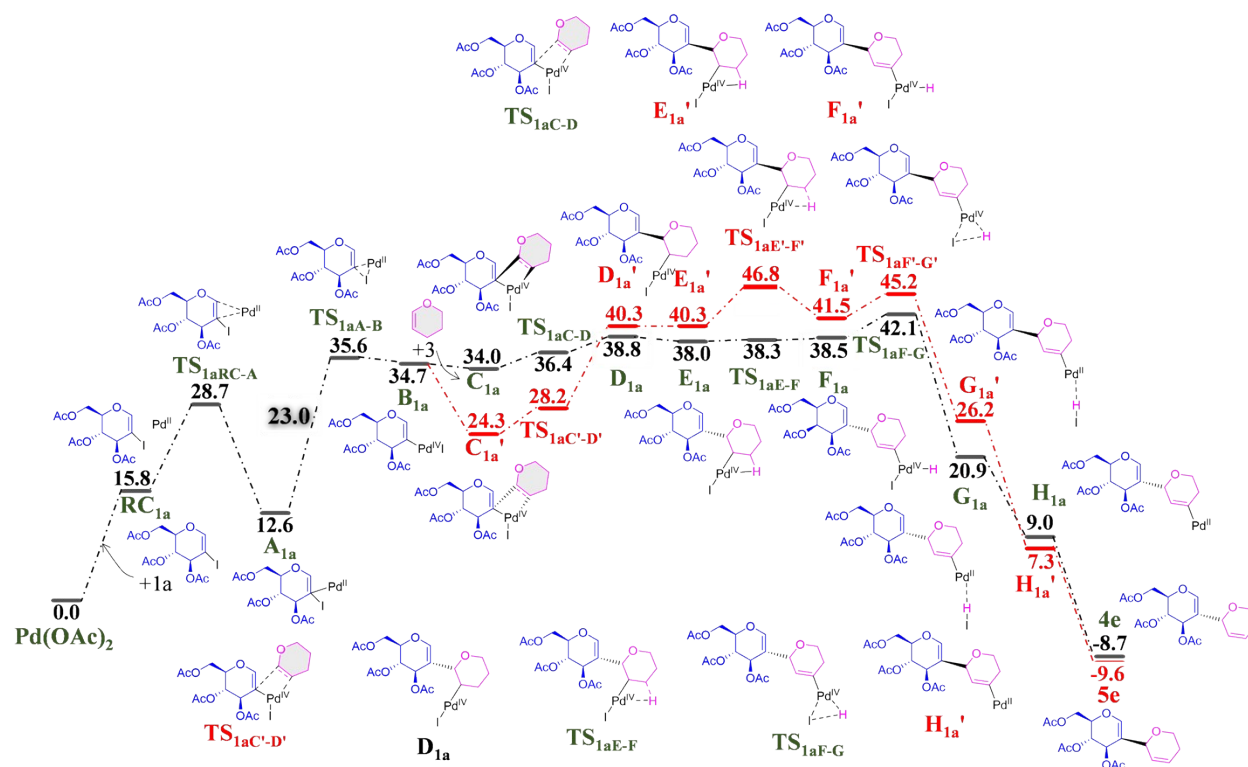

Notably, only the product-forming step from the active catalyst is exergonic relative to all other steps, suggesting that Pd(OAc)<sub>2</sub> is unlikely to be the actual active catalyst for the C–C coupling reaction.

**Figure Sb.** Free energy profiles for the Pd-catalyzed C-C coupling of 2-iodoglucal (**1a**) and DHP (**3a**). The relative free energies are given in kcal/mol.

In conclusion, both catalytic pathways involve oxidative addition and other steps with very high energy barriers, while only the product-forming step is exergonic relative to the others from the active catalytic species (Figure Sa and Sb). Moreover, the intermediates formed after  $\beta$ -hydride elimination are thermodynamically unfavorable. Consequently, Pd(OAc)<sub>2</sub> is unlikely to be the true active catalyst for the C–C coupling reaction; however, it behaves as a pre-catalyst and is further reduced in the presence of DMF to generate Pd(0), which serves as the true active catalytic species, as illustrated in the catalytic cycle described below.<sup>13</sup>

13. Sherwood, J.; Clark, J.; Fairlamb, I. J. S.; Slattery, J. M. Solvent effects in palladium catalysed cross-coupling reactions. *Green Chem.* 2019, **21**, 2164–2213.

## 6. Computational details

Geometry optimizations were performed using the hybrid B3LYP density functional augmented with Grimme's D3 dispersion correction (B3LYP-D3), as implemented in the Gaussian 09 program.<sup>14-18</sup> Solvation effects were treated using the SMD continuum solvation model.<sup>19</sup> The 6-31G\*\* basis set was employed for C, H, and O atoms,<sup>20</sup> while the SDD<sup>21</sup> effective core potential and corresponding basis set were used for Pd and I atoms. Harmonic vibrational frequency analyses were carried out at the same level of theory to characterize all stationary points as either minima (no imaginary frequencies) or transition states (one imaginary frequency), as expected for the bond-forming event. Intrinsic reaction coordinate (IRC) calculations were performed to confirm that each transition state connects the corresponding reactant and product along the reaction pathway.<sup>22,23</sup> Single-point energy refinements were subsequently performed at the B3LYP-D3/def2-TZVP level using the Gaussian 09 package.<sup>24,25</sup> Thus, the single-point energies are at the SMD(DMF)/B3LYP-D3/def2-TZVP//B3LYP-D3/6-31G\*\*,SDD level of theory. Zero-point vibrational energies well as thermal and entropic corrections, obtained from solvent-phase computations at 298 K and 1 atm, were applied to the single-point energies calculated in the solvent phase. The discussion in this manuscript is based on Gibbs free

energies in the solvent phase. Non-covalent interaction (NCI) analyses are executed with the help of VMD 1.9.3 and Multiwfn 3.8 software.<sup>26,27</sup>

14. Frisch, M. J. *et al.* Gaussian 09, Revision D.01; Gaussian, Inc.: Wallingford, CT, 2013.
15. Becke, A. D. Density-functional thermochemistry. III. The role of exact exchange. *J. Chem. Phys.* 1993, **98**, 5648-5652.
16. Lee, C., Yang, W. & Parr, R. G. Development of the Colle-Salvetti correlation-energy formula into a functional of the electron density. *Phys. Rev B.* 1988, **37**, 785-789.
17. Grimme, S., Antony, J., Ehrlich, S. & Krieg, H. A consistent and accurate ab initio parametrization of density functional dispersion correction (DFT-D) for the 94 elements H-Pu. *J. Chem. Phys.* 2010, **132**, 154104–154123.
18. H. K. Kisan, R. B. Sunoj, Insights on the Origin of Regiodivergence in the Parallel Kinetic Resolution of rac-Aziridines Using a Chiral Lanthanum–Yttrium Bimetallic Catalyst, *ACS Catal.* **2018**, *8*, 7633–7644.
19. A. V. Marenich, C. J. Cramer and D. G. Truhlar, *J. Phys. Chem. B*, 2009, **113**, 6378–6396.
20. (a) W. J. Hehre, R. Ditchfeld and J. A. Pople, *J. Chem. Phys.*, 1972, **56**, 2257–2261; (b) P. C. Hariharan and J. A. Pople, *Theor. Chim. Acta*, 1973, **28**, 213–222; (c) C. Lee, W. Yang and R. G. Parr, *Phys. Rev. B: Condens. Matter Mater. Phys.*, 1988, **37**, 785–789; (d) A. D. Becke, *J. Chem. Phys.*, 1993, **98**, 5648–5652.
21. (a) D. Andrae, U. Haussermann, M. Dolg, H. Stoll and H. Preuss, *Theor. Chim. Acta*, 1990, **77**, 123–141; (b) P. Fuentealba, H. Stoll, L. von Szentpály, P. Schwerdtfeger and H. Preuss, *J. Phys. B: At., Mol. Opt. Phys.*, 1983, **16**, L323–L328; (c) P. J. Hay and W. R. Wadt, *J. Chem. Phys.*, 1985, **82**, 270–283; (d) P. J. Hay and W. R. Wadt, *J. Chem. Phys.*, 1985, **82**, 299–310.
22. C. Gonzalez, H. B. Schlegel, An improved algorithm for reaction path following, *J. Chem. Phys.* **1989**, *90*, 2154–2161.
23. C. Gonzalez, H. B. Schlegel, Reaction path following in mass-weighted internal coordinates, *J. Phys. Chem.* **1990**, *94*, 5523–5527.
24. Weigend, F. & Ahlrichs, R. Balanced basis sets of split valence, triple zeta valence and quadruple zeta valence quality for H to Rn: Design and assessment of accuracy. *Phys. Chem. Chem. Phys.* 2005, **7**, 3297-3305.
25. Weigend, F. Accurate Coulomb-fitting basis sets for H to Rn. *Phys. Chem. Chem. Phys.* 2006, **8**, 1057-1065.
26. W. Humphrey, A. Dalke and K. Schulten, VMD: visual molecular dynamics, *J. Mol. Graphics*, 1996, **14**, 33–38.

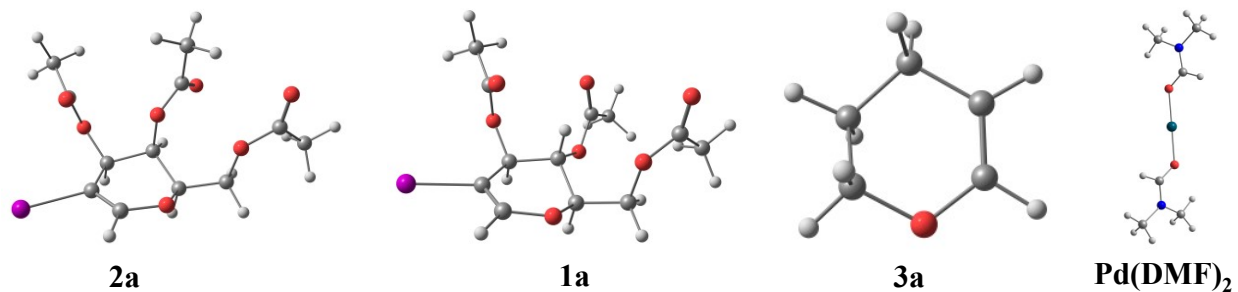

**Fig. S1.** The optimized structures of **2a** (2-iodogalactal), **1a** (2-iodoglucal), **3a** (Dihydropyran) and [Pd(DMF)<sub>2</sub>].

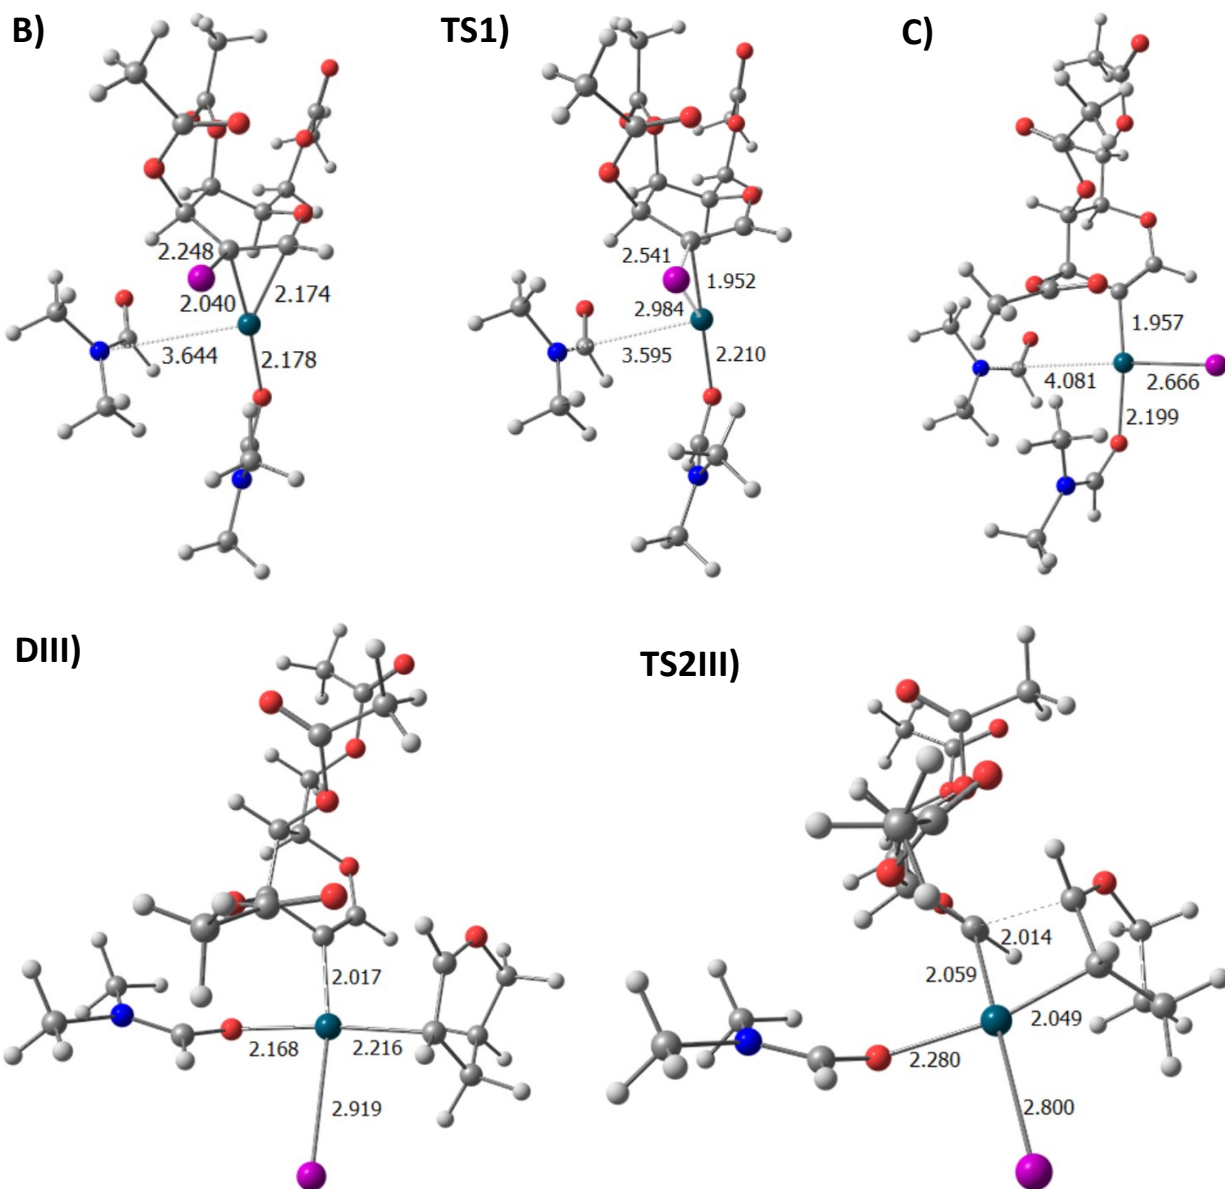

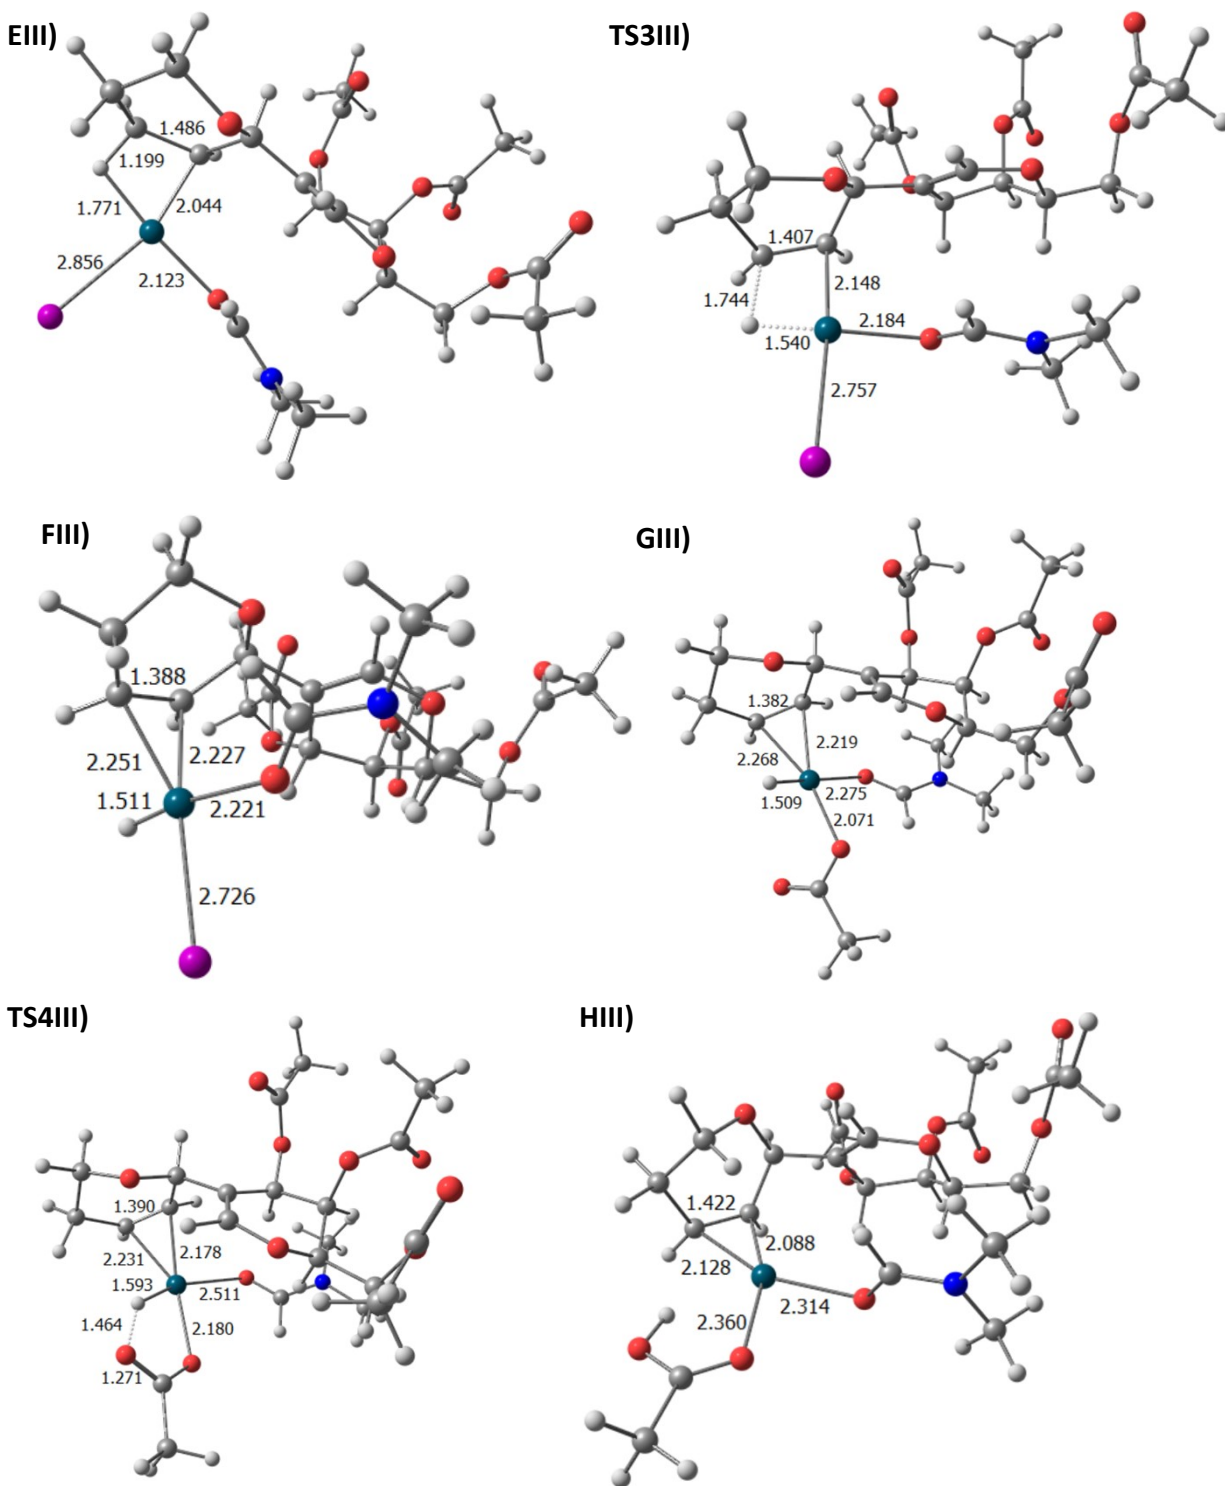

**Fig. S2.** The optimized structures for selected species (reaction with **2a**) together with selected bond distances shown in Fig. 1.

D I)

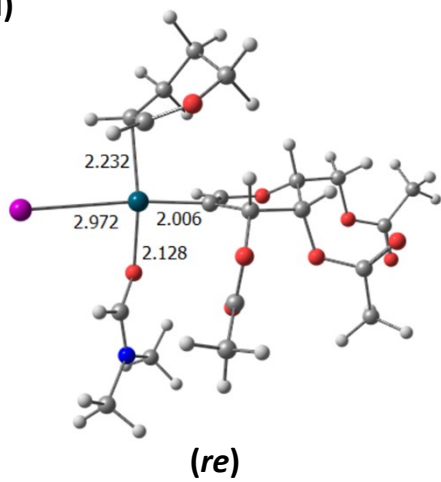

D II)

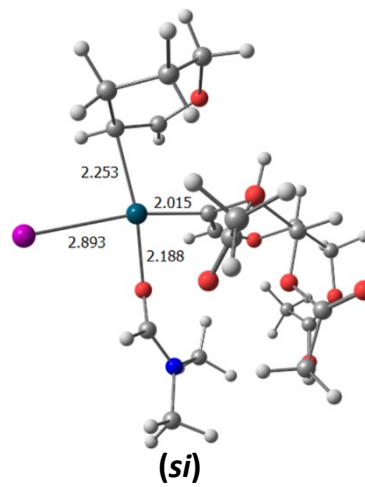

D III)

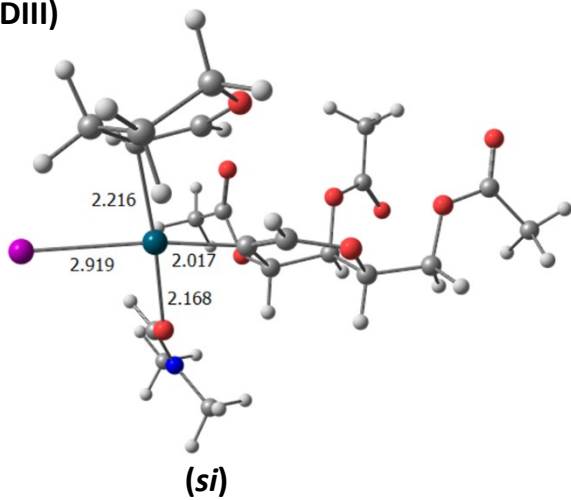

D IV)

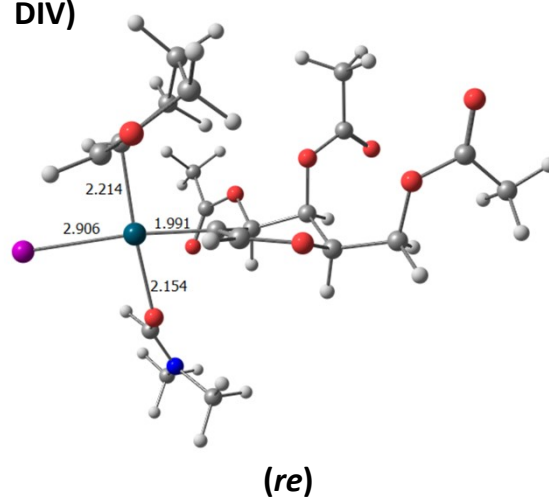

**Fig. S3.** Optimized structures of intermediate **D** with four distinct orientations of **2a** coordinated to the Pd center, along with selected bond distances, are shown in Fig. 1.

TS2I)

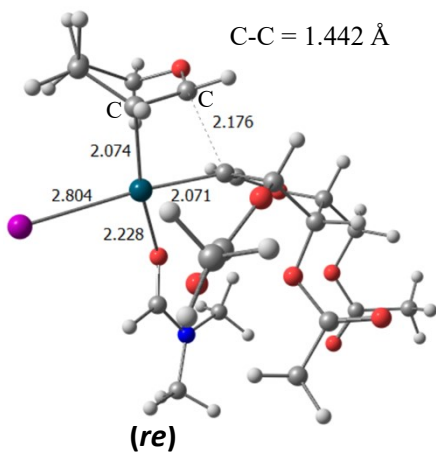

TS2II)

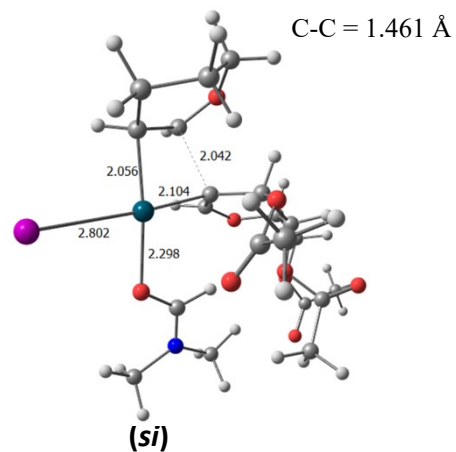

TS2III)

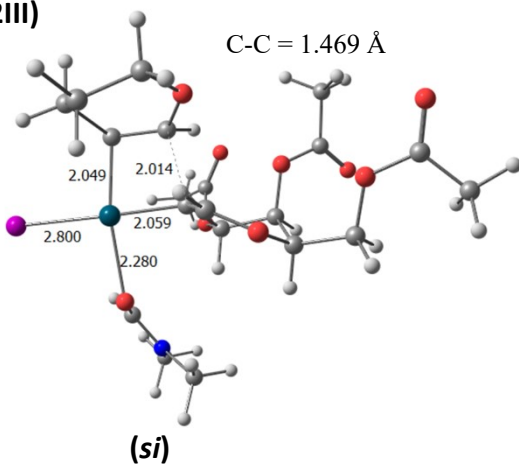

TS2IV)

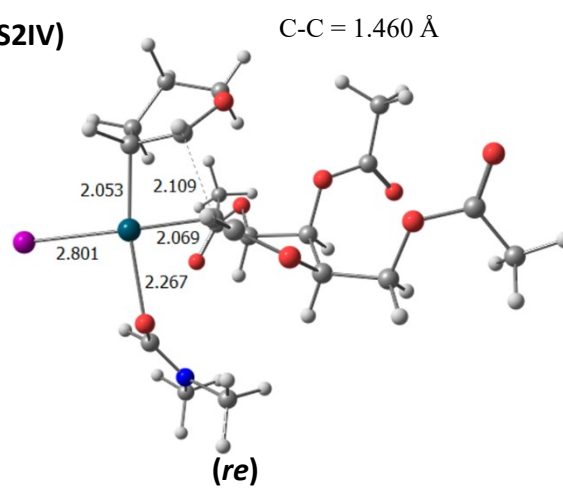

**Fig. S4.** Optimized structures of species TS2<sub>2a</sub> with four distinct orientations, along with selected bond distances, are shown in Fig. 1.

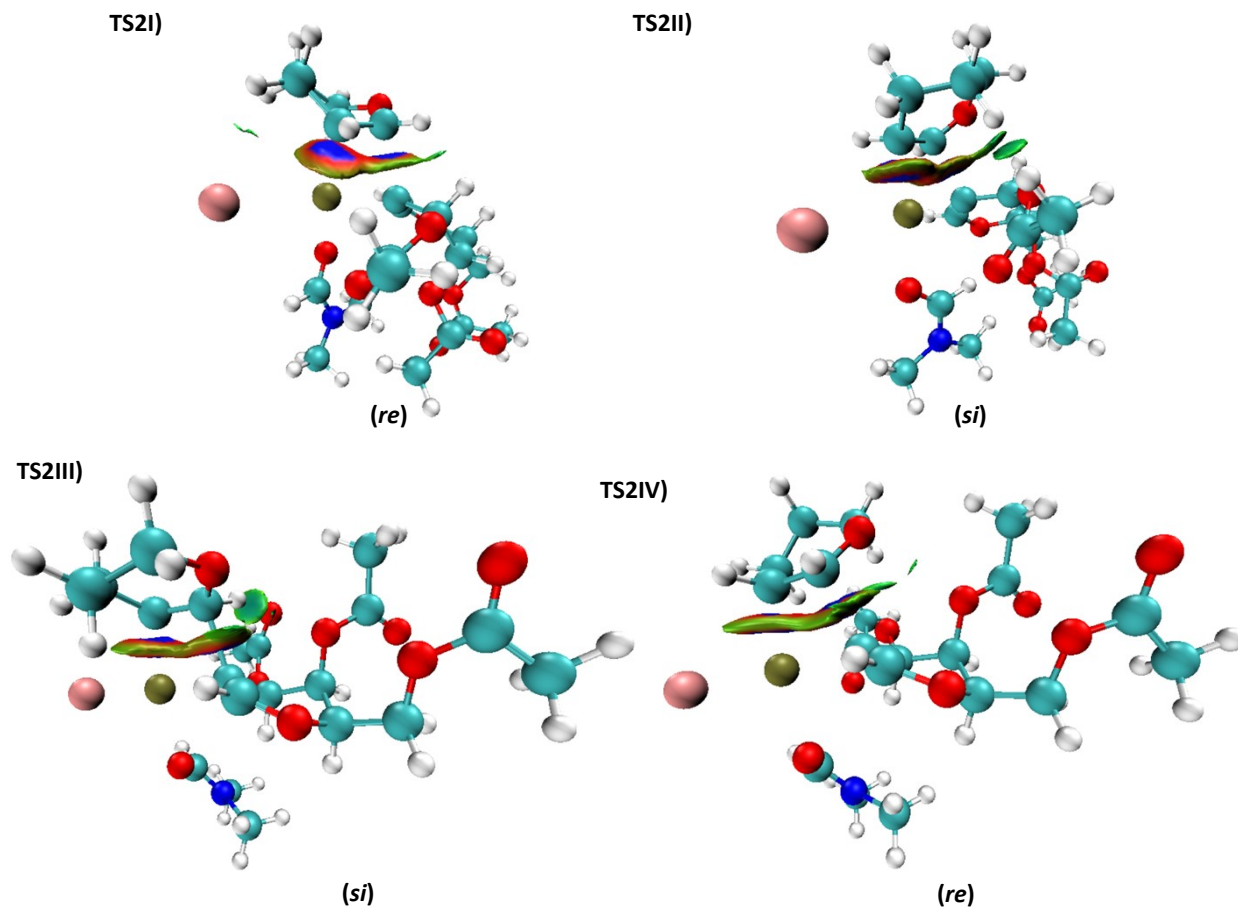

Fig. S5. Non-covalent interaction (IGMH) analysis of TS2<sub>2a</sub> species with four distinct orientations.

### Activation Strain Analysis

**Table S1.** Relative distortion energies of individual fragments with respect to the pre-reacting complex, along with total distortion ( $\Delta\Delta E_{\ddagger,d}$ ) and interaction energies ( $\Delta\Delta E_{\ddagger,i}$ ) for the regio- and stereocontrolling transition states at the SMD(DMF)/B3LYP-D3/def2-TZVP level. Energies are given in kcal/mol.

$$\Delta E_{\text{act}} = \Delta E_{\text{distortion}} + \Delta E_{\text{interaction}}$$

$$\Delta E_{\text{distortion}} = [\{E_{f1(\text{TS})} + E_{f2(\text{TS})}\} - \{E_{f1} + E_{f2}\}]$$

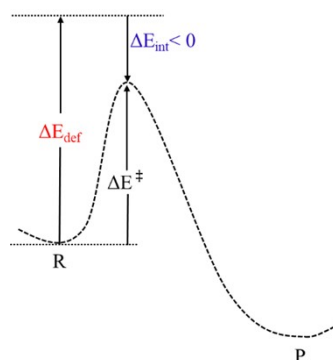

$$\Delta E_{\text{interaction}} = [E_{\text{(TS)}} - \{E_{\text{f1}} + E_{\text{f2}}\}]$$

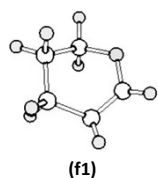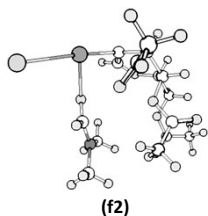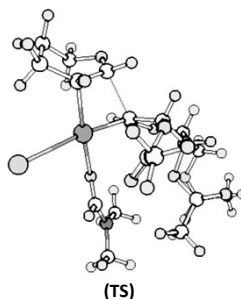

| TSs                        | Distortion Energy ( $E_{\text{distortion}}$ )  |                                                | Total Distortion Energy | Interaction Energy ( $E_{\text{interaction}}$ ) | Activation Strain Energy ( $E_{\text{act}}$ ) | Barrier Height |
|----------------------------|------------------------------------------------|------------------------------------------------|-------------------------|-------------------------------------------------|-----------------------------------------------|----------------|
|                            | $\Delta\Delta E_{\text{d}}^{\ddagger}$<br>(f1) | $\Delta\Delta E_{\text{d}}^{\ddagger}$<br>(f2) |                         |                                                 |                                               |                |
| <b>2a (2-iodogalactal)</b> |                                                |                                                |                         |                                                 |                                               |                |
| <b>TS2I<sub>2a</sub></b>   | 18.9                                           | 6.2                                            | 25.1                    | -35.5                                           | 10.4                                          | 9.7            |
| <b>TSII<sub>2a</sub></b>   | 19.9                                           | 11.4                                           | 31.3                    | -40.4                                           | 9.1                                           | 8.8            |
| <b>TSIII<sub>2a</sub></b>  | 20.6                                           | 13.9                                           | 34.5                    | -47.1                                           | 12.6                                          | 8.2            |
| <b>TSIV<sub>2a</sub></b>   | 20.9                                           | 10.9                                           | 31.8                    | -43.1                                           | 11.3                                          | 12.1           |
| <b>1a (2-iodoglucal)</b>   |                                                |                                                |                         |                                                 |                                               |                |
| <b>TSI<sub>1a</sub></b>    | 14.1                                           | 9.6                                            | 23.7                    | -36.1                                           | 12.4                                          | 5.5            |
| <b>TSII<sub>1a</sub></b>   | 17.9                                           | 9.3                                            | 27.2                    | -36.6                                           | 9.4                                           | 9.5            |
| <b>TSIII<sub>1a</sub></b>  | 16.4                                           | 12.8                                           | 29.2                    | -41.1                                           | 11.9                                          | 8.8            |
| <b>TSIII<sub>1a</sub></b>  | 20.7                                           | 9.8                                            | 30.5                    | -42.0                                           | 11.5                                          | 12.6           |

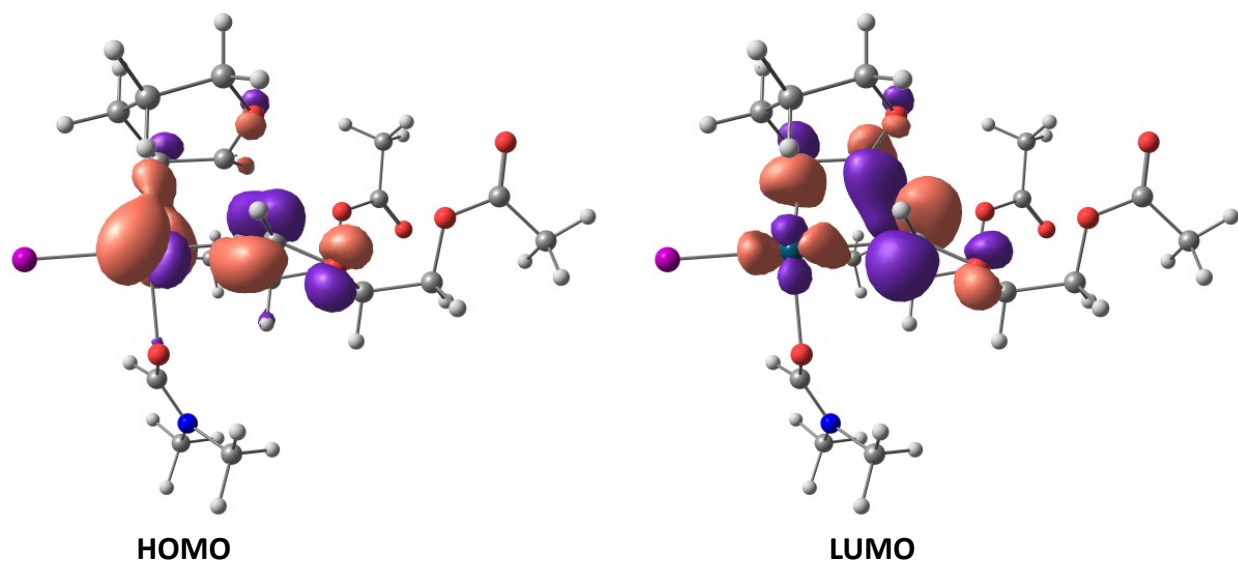

**Fig. S6.** HOMO of the Pd complex, showing filled Pd *d*-orbital character, and LUMO of the alkene, corresponding to the  $\pi^*$  antibonding orbital of the C=C bond in **TS2III<sub>2a</sub>**.

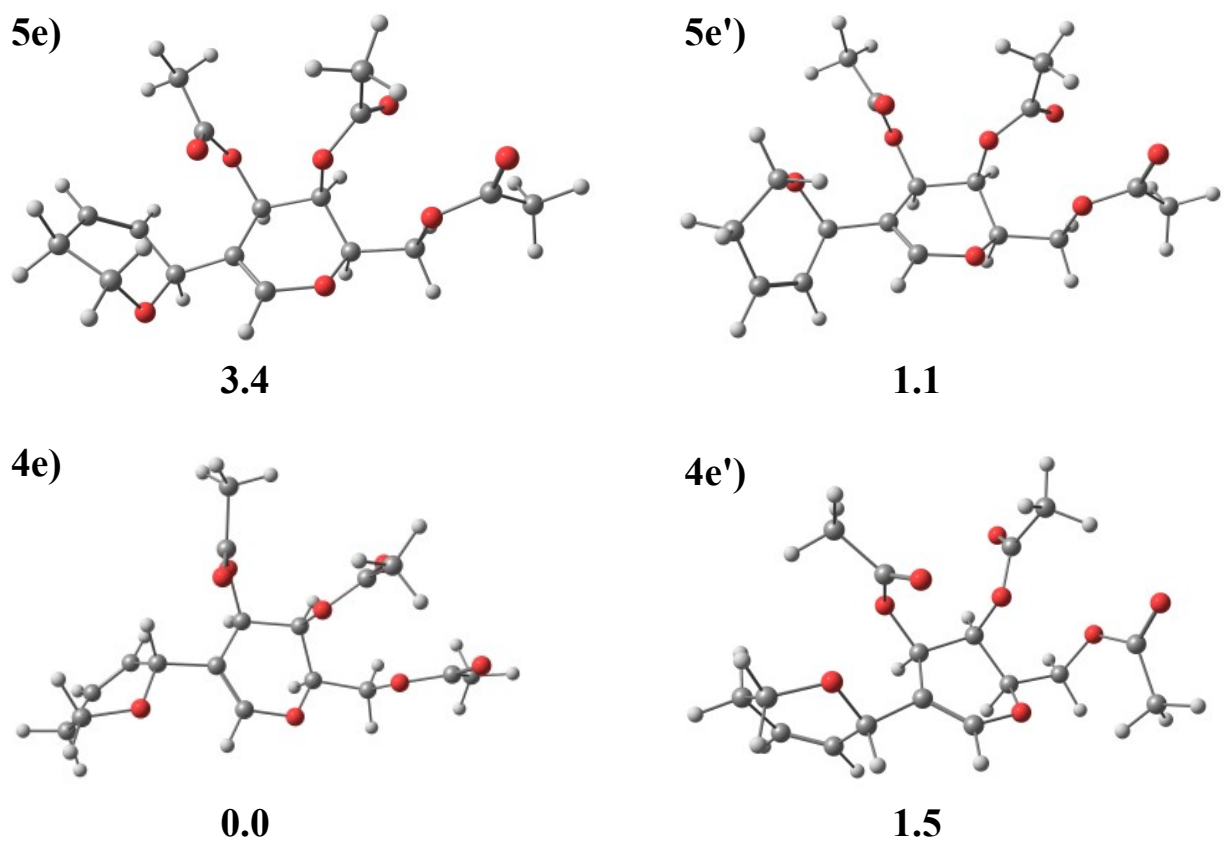

**Fig. S7.** Optimized structures of species of products of **5e/5e'** and **4e/4e'**. The relative free energies are given in kcal/mol.

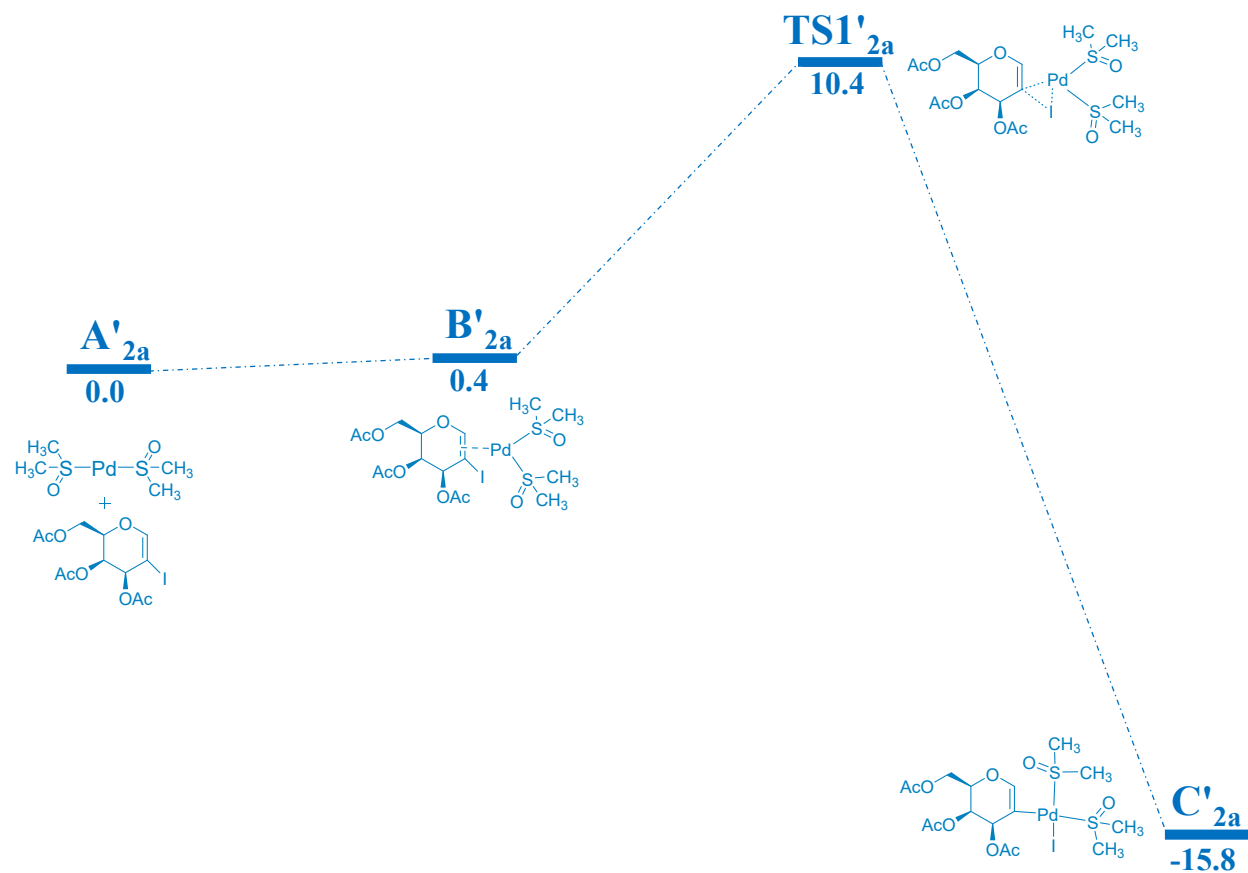

**Fig. S8.** Free energy profiles for oxidative addition of 2-iodogalactal (**2a**) with  $\text{Pd}(\text{DMSO})_2$ . Relative free energies are reported in kcal/mol.

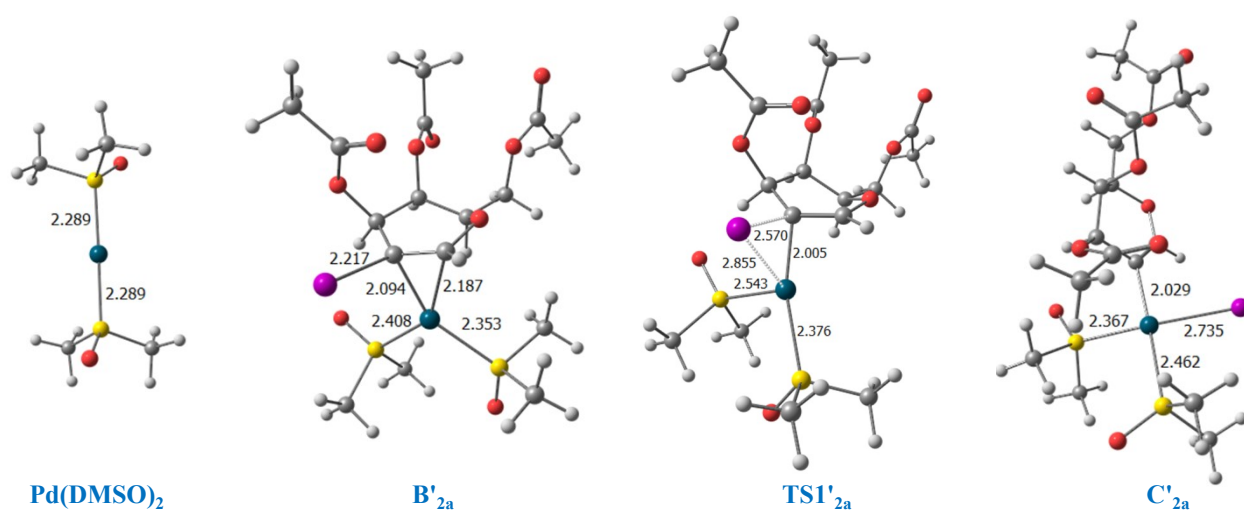

**Fig. S9.** The optimized structures of the species involved in the reaction of **2a** with  $\text{Pd}(\text{DMSO})_2$ , along with selected bond distances.

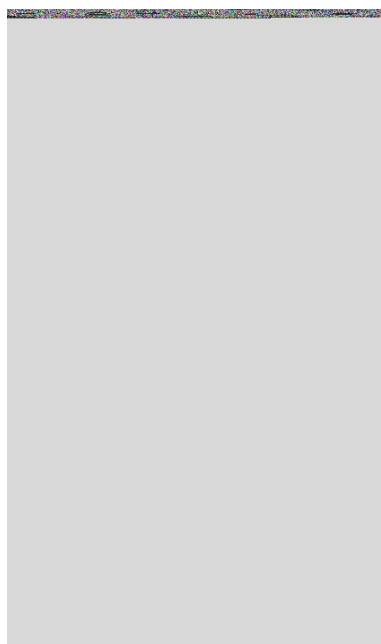

**TS1<sub>2a</sub>**

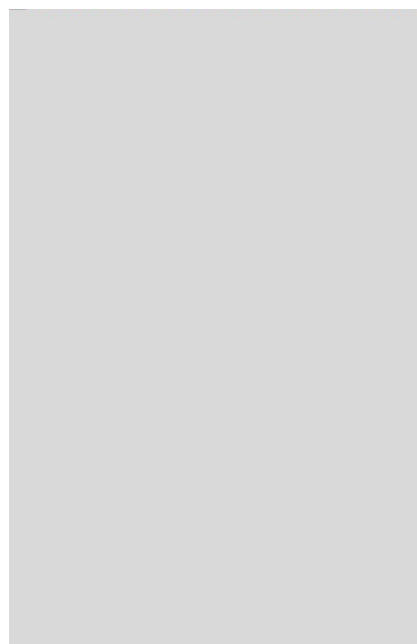

**TS1'<sub>2a</sub>**

**Fig. S10.** The optimized structures of oxidative addition transition states with DMF (TS1<sub>2a</sub>) and DMSO (TS1'<sub>2a</sub>) as ligands, along with selected bond distances.

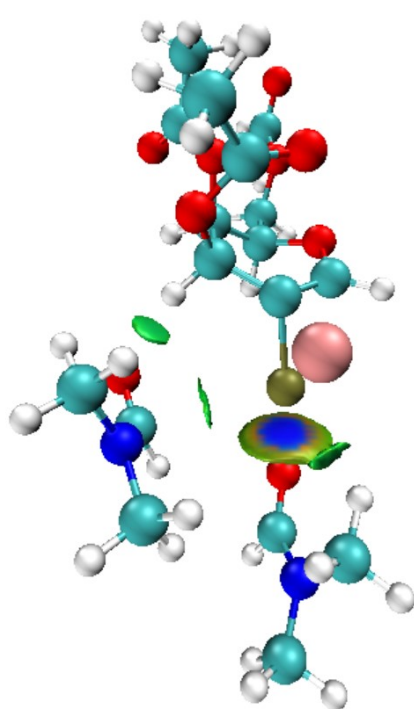

**TS1<sub>2a</sub>**

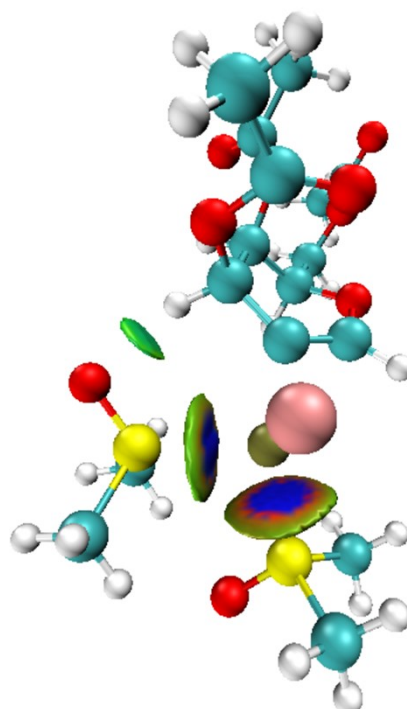

**TS1'<sub>2a</sub>**

**Fig. S11.** Non-covalent interaction (IGMH) analysis of the oxidative addition transition states with DMF (TS1<sub>2a</sub>) and DMSO (TS1'<sub>2a</sub>) as ligands.

D I)

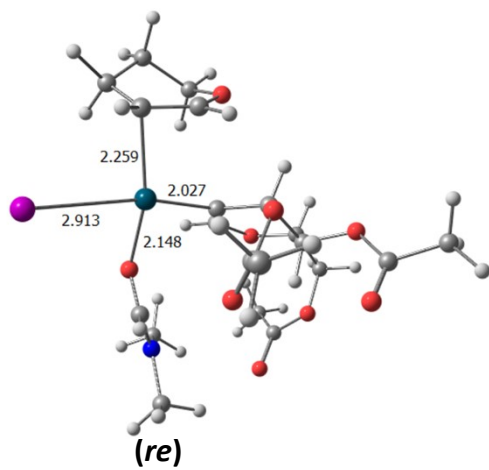

D II)

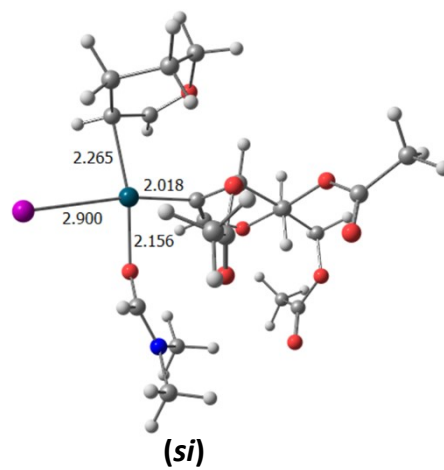

D III)

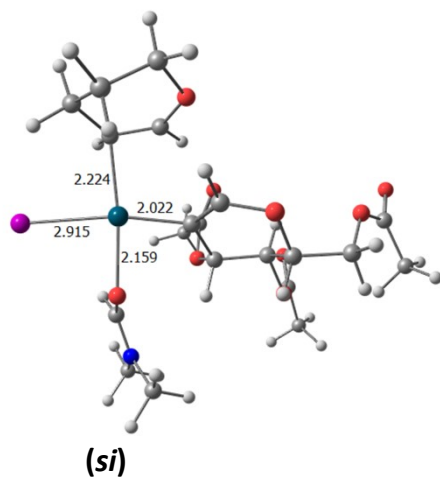

D IV)

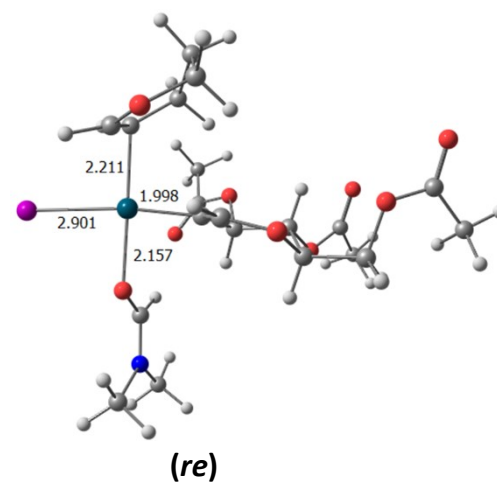

**Fig. S12.** Optimized structures of species **D** with four distinct orientations of **1a** coordinated to the Pd center, along with selected bond distances, are shown in Fig. 2.

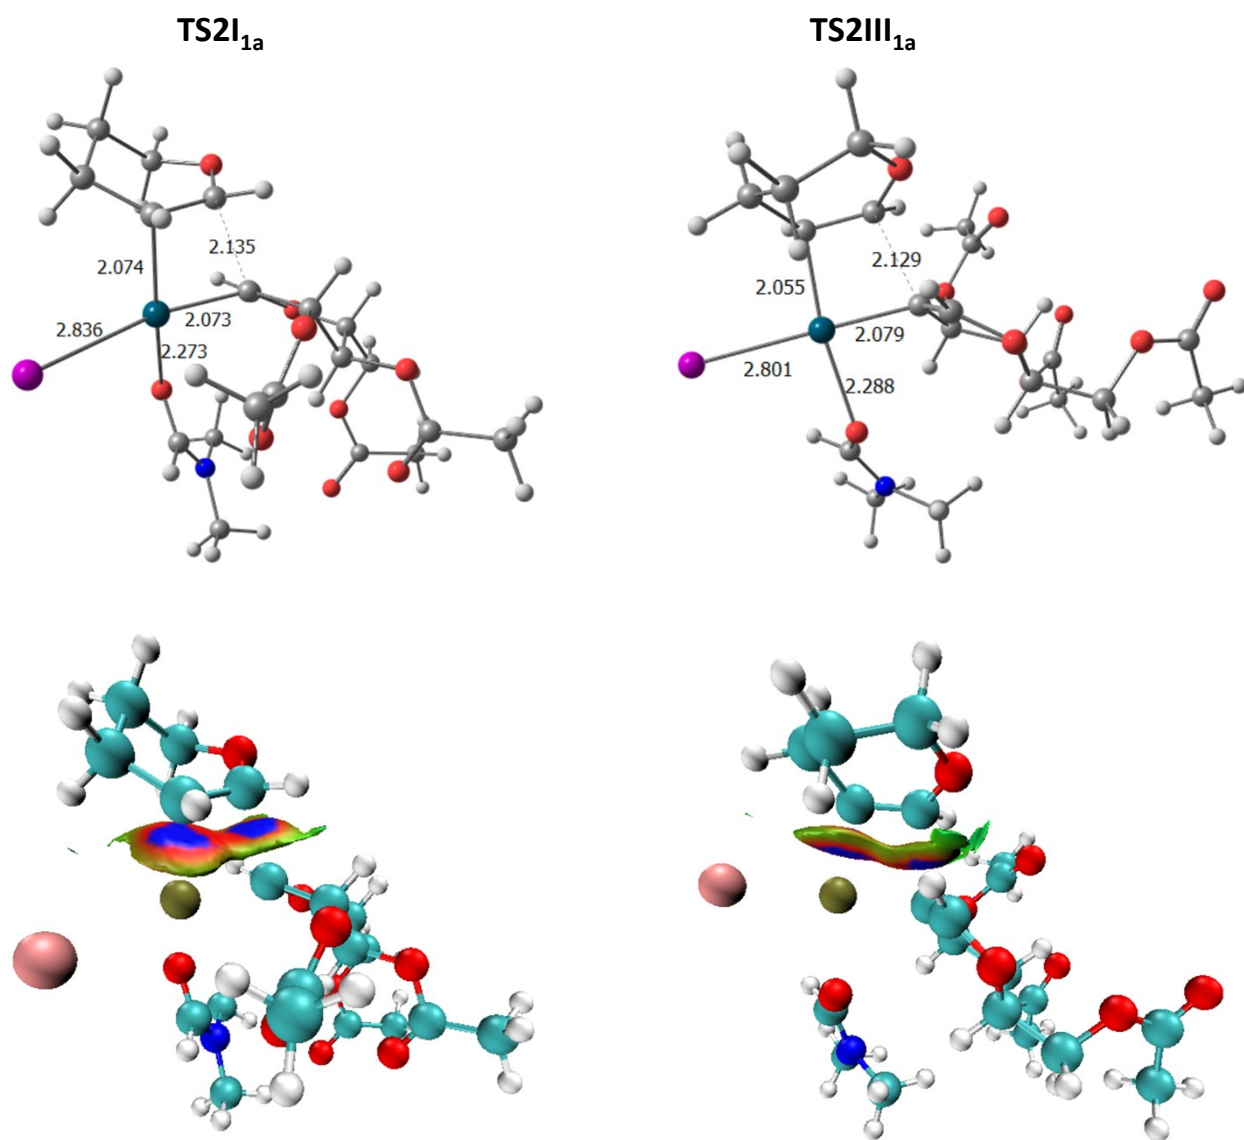

**Fig. S13.** Optimized structures of species **TS2I<sub>1a</sub>** and **TS2III<sub>1a</sub>**, along with selected bond distances and corresponding non-covalent interaction (IGMH) analysis.

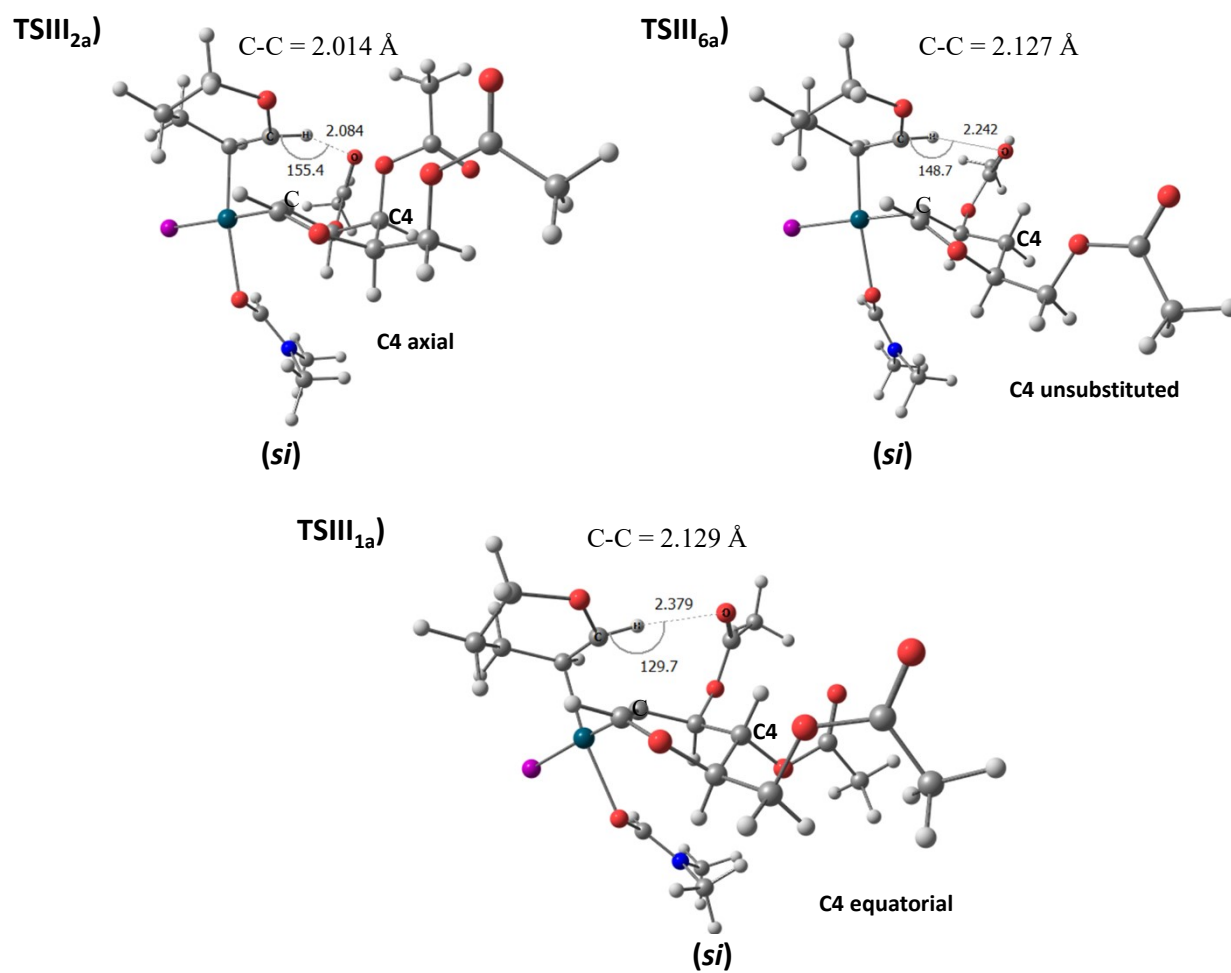

**Fig. S14.** Optimized structures of **TSIII** with different substrates (**1a**, **2a** and **6a**), along with selected bond distances (Å) and angle (°).

**Table S2.** Cartesian coordinates (Å) of the optimized structures of all reactants, intermediates, transition states and products at B3LYP-D3/6-31G\*\*,SDD in SMD(DMF)level of theory.

**(1) Computational investigation of the Pd-catalyzed C–C coupling of between 2a and 3a**

**[Pd(DMF)<sub>2</sub>]**

|    |              |              |              |
|----|--------------|--------------|--------------|
| Pd | -0.000260000 | 0.062223000  | -0.192157000 |
| N  | -4.256466000 | 0.004877000  | 0.185157000  |
| N  | 4.254094000  | -0.105996000 | 0.195581000  |
| C  | 2.947466000  | -0.343327000 | 0.322385000  |
| H  | 2.698842000  | -1.257926000 | 0.871211000  |
| O  | 2.056785000  | 0.410949000  | -0.139858000 |
| C  | -2.966647000 | 0.335875000  | 0.262769000  |
| H  | -2.754358000 | 1.206753000  | 0.891665000  |
| O  | -2.051940000 | -0.286492000 | -0.331088000 |
| C  | 4.762865000  | 1.059883000  | -0.518308000 |
| H  | 5.369363000  | 1.672262000  | 0.157219000  |
| H  | 3.929810000  | 1.650772000  | -0.895888000 |
| H  | 5.389846000  | 0.734401000  | -1.355120000 |
| C  | 5.246794000  | -1.017058000 | 0.753622000  |
| H  | 5.882556000  | -0.484130000 | 1.468661000  |
| H  | 5.878453000  | -1.417620000 | -0.046371000 |
| H  | 4.752401000  | -1.844565000 | 1.265867000  |
| C  | -5.276427000 | 0.764974000  | 0.898540000  |
| H  | -6.005465000 | 1.170080000  | 0.188751000  |
| H  | -4.816306000 | 1.590223000  | 1.445157000  |
| H  | -5.800002000 | 0.114940000  | 1.607562000  |
| C  | -4.717295000 | -1.136235000 | -0.598011000 |
| H  | -5.440535000 | -0.800075000 | -1.348181000 |
| H  | -5.205464000 | -1.863473000 | 0.059520000  |
| H  | -3.869888000 | -1.606401000 | -1.094423000 |

**2a**

|   |              |              |              |
|---|--------------|--------------|--------------|
| C | -5.446395000 | -1.324199000 | 0.629466000  |
| C | -4.572325000 | -0.780016000 | -0.471322000 |
| O | -4.988491000 | -0.121555000 | -1.403414000 |
| O | -3.240885000 | -1.030155000 | -0.422271000 |
| H | -6.489221000 | -1.164769000 | 0.356465000  |
| H | -5.266138000 | -2.389274000 | 0.801470000  |
| H | -5.240784000 | -0.794655000 | 1.566444000  |
| C | 1.510921000  | 3.654777000  | 0.382162000  |
| C | 1.330551000  | 2.213972000  | -0.021171000 |
| O | 1.327088000  | 1.798932000  | -1.156574000 |
| O | 1.190267000  | 1.452494000  | 1.101625000  |
| H | 1.705875000  | 4.262356000  | -0.501705000 |
| H | 0.602331000  | 4.008369000  | 0.880683000  |
| H | 2.336686000  | 3.751699000  | 1.093261000  |
| C | -1.152465000 | -1.475485000 | 0.715181000  |
| C | 0.757162000  | -1.743392000 | -0.648827000 |
| C | -0.745060000 | -0.023173000 | 0.961169000  |
| C | 0.794245000  | 0.066548000  | 1.066739000  |

|   |              |              |              |
|---|--------------|--------------|--------------|
| C | 1.439346000  | -0.816716000 | 0.035337000  |
| O | -0.575612000 | -1.980702000 | -0.503600000 |
| C | -2.646939000 | -1.739178000 | 0.679413000  |
| H | 1.208727000  | -2.401487000 | -1.383864000 |
| H | 1.076069000  | -0.284469000 | 2.064019000  |
| H | -0.754511000 | -2.065426000 | 1.554202000  |
| H | -3.066577000 | -1.419044000 | 1.636361000  |
| H | -2.820133000 | -2.813234000 | 0.557014000  |
| O | -1.169918000 | 0.805768000  | -0.125077000 |
| C | -2.238079000 | 1.617944000  | 0.071564000  |
| H | -1.192153000 | 0.333290000  | 1.891374000  |
| C | -2.599205000 | 2.321360000  | -1.203569000 |
| H | -3.207541000 | 1.628656000  | -1.796630000 |
| H | -3.190358000 | 3.210827000  | -0.981705000 |
| H | -1.706225000 | 2.581202000  | -1.775988000 |
| O | -2.826660000 | 1.719480000  | 1.129331000  |
| I | 3.579002000  | -0.744015000 | -0.152800000 |

### 3a

|   |              |              |              |
|---|--------------|--------------|--------------|
| C | 0.529097000  | -1.228143000 | 0.289874000  |
| C | 0.907326000  | 1.072239000  | -0.081154000 |
| C | -0.855184000 | -1.044518000 | -0.324345000 |
| C | -1.451505000 | 0.297477000  | 0.129006000  |
| C | -0.391537000 | 1.368564000  | 0.059833000  |
| O | 1.439994000  | -0.184700000 | -0.110517000 |
| H | 1.681081000  | 1.827984000  | -0.193800000 |
| H | -1.851298000 | 0.210188000  | 1.149837000  |
| H | 0.461120000  | -1.226605000 | 1.387511000  |
| H | -1.493738000 | -1.886392000 | -0.036861000 |
| H | -2.304678000 | 0.567865000  | -0.506068000 |
| H | -0.758414000 | -1.060509000 | -1.416606000 |
| H | -0.679112000 | 2.415664000  | 0.087834000  |
| H | 0.995909000  | -2.164312000 | -0.026992000 |

### B<sub>2a</sub>

|    |              |              |              |
|----|--------------|--------------|--------------|
| Pd | 1.355605000  | -1.099846000 | -0.459097000 |
| C  | 3.943739000  | -2.901057000 | -0.045992000 |
| O  | 2.707665000  | -2.790479000 | -0.219038000 |
| C  | -5.509622000 | -3.551780000 | 0.075789000  |
| C  | -5.373874000 | -2.237881000 | -0.651496000 |
| O  | -6.307001000 | -1.644417000 | -1.155211000 |
| O  | -4.143832000 | -1.677536000 | -0.747289000 |
| H  | -6.533421000 | -3.907590000 | -0.036909000 |
| H  | -4.812545000 | -4.299865000 | -0.313511000 |
| H  | -5.292995000 | -3.419477000 | 1.141177000  |
| C  | -2.248414000 | 4.240497000  | 0.158922000  |
| C  | -1.796677000 | 2.872214000  | -0.282324000 |
| O  | -1.945092000 | 2.408914000  | -1.390388000 |
| O  | -1.166241000 | 2.249619000  | 0.749830000  |
| H  | -2.800323000 | 4.722725000  | -0.648256000 |
| H  | -2.878733000 | 4.159654000  | 1.049334000  |
| H  | -1.378352000 | 4.850034000  | 0.424841000  |
| C  | -1.824511000 | -1.325211000 | -0.116193000 |
| C  | -0.315415000 | -0.285604000 | -1.586595000 |
| C  | -1.972033000 | -0.088026000 | 0.772671000  |
| C  | -0.730845000 | 0.876017000  | 0.653696000  |
| C  | 0.147466000  | 0.541179000  | -0.549282000 |
| O  | -1.496704000 | -0.983480000 | -1.466703000 |
| C  | -2.998322000 | -2.285803000 | -0.120512000 |

|   |              |              |              |
|---|--------------|--------------|--------------|
| H | -0.036912000 | -0.160025000 | -2.627584000 |
| H | -0.145719000 | 0.755804000  | 1.562774000  |
| H | -0.972200000 | -1.893088000 | 0.300079000  |
| H | -3.216615000 | -2.553281000 | 0.916491000  |
| H | -2.715505000 | -3.186420000 | -0.674454000 |
| I | 1.567678000  | 2.188623000  | -1.116953000 |
| H | 4.326251000  | -3.771134000 | 0.502486000  |
| C | 6.306072000  | -2.364913000 | -0.209624000 |
| H | 6.836975000  | -2.497248000 | -1.158174000 |
| H | 6.766314000  | -1.537754000 | 0.339619000  |
| H | 6.396687000  | -3.278938000 | 0.379991000  |
| C | 4.632915000  | -0.882140000 | -1.273081000 |
| H | 4.877468000  | -1.082708000 | -2.322286000 |
| H | 3.578606000  | -0.596045000 | -1.201954000 |
| H | 5.252401000  | -0.056672000 | -0.914046000 |
| N | 4.898170000  | -2.066758000 | -0.463600000 |
| O | 0.829493000  | -0.677970000 | 3.189381000  |
| C | 1.961497000  | -0.609684000 | 2.701190000  |
| N | 2.674777000  | 0.526272000  | 2.523528000  |
| C | 2.162256000  | 1.816514000  | 2.959002000  |
| H | 2.866883000  | 2.280933000  | 3.658749000  |
| H | 2.029368000  | 2.484288000  | 2.101060000  |
| H | 1.204147000  | 1.669406000  | 3.457494000  |
| C | 3.996997000  | 0.512708000  | 1.918243000  |
| H | 4.005907000  | 1.129942000  | 1.013613000  |
| H | 4.742855000  | 0.907658000  | 2.618612000  |
| H | 4.273268000  | -0.508729000 | 1.648916000  |
| H | 2.509839000  | -1.506988000 | 2.365458000  |
| O | -3.159432000 | 0.646355000  | 0.444865000  |
| C | -4.280732000 | 0.410104000  | 1.164380000  |
| C | -5.431604000 | 1.200487000  | 0.610536000  |
| H | -5.111561000 | 2.196037000  | 0.293758000  |
| H | -5.809086000 | 0.665049000  | -0.268240000 |
| H | -6.226453000 | 1.269198000  | 1.354141000  |
| O | -4.338778000 | -0.363365000 | 2.100691000  |
| H | -2.045933000 | -0.422330000 | 1.809181000  |

## TS1<sub>2a</sub>

|    |              |              |              |
|----|--------------|--------------|--------------|
| Pd | 1.469241000  | -1.011575000 | -0.497466000 |
| C  | 4.170683000  | -2.681456000 | 0.011929000  |
| O  | 2.948664000  | -2.634331000 | -0.252505000 |
| C  | -6.123093000 | -3.087186000 | 0.043472000  |
| C  | -5.830586000 | -1.785034000 | -0.657759000 |
| O  | -6.690535000 | -1.033753000 | -1.072387000 |
| O  | -4.536993000 | -1.417515000 | -0.829774000 |
| H  | -7.188817000 | -3.296419000 | -0.046115000 |
| H  | -5.545383000 | -3.915872000 | -0.375783000 |
| H  | -5.865736000 | -3.002832000 | 1.104998000  |
| C  | -1.698183000 | 4.207311000  | 0.209123000  |
| C  | -1.597200000 | 2.766916000  | -0.221867000 |
| O  | -1.909827000 | 2.336626000  | -1.308837000 |
| O  | -1.075764000 | 2.028760000  | 0.793194000  |
| H  | -2.197704000 | 4.788171000  | -0.566637000 |
| H  | -2.250192000 | 4.285287000  | 1.150400000  |
| H  | -0.692707000 | 4.606766000  | 0.378485000  |
| C  | -2.186137000 | -1.380363000 | -0.244650000 |
| C  | -0.623184000 | -0.389101000 | -1.668123000 |
| C  | -2.180578000 | -0.206751000 | 0.741836000  |
| C  | -0.833449000 | 0.613749000  | 0.651408000  |
| C  | -0.046668000 | 0.215147000  | -0.579183000 |

|   |              |              |              |
|---|--------------|--------------|--------------|
| O | -1.841743000 | -0.987434000 | -1.584146000 |
| C | -3.458479000 | -2.205812000 | -0.293970000 |
| H | -0.232349000 | -0.357027000 | -2.678687000 |
| H | -0.255748000 | 0.381744000  | 1.544203000  |
| H | -1.392782000 | -2.060601000 | 0.109617000  |
| H | -3.678434000 | -2.539164000 | 0.722513000  |
| H | -3.294034000 | -3.078408000 | -0.934011000 |
| I | 1.783389000  | 1.883131000  | -1.151369000 |
| H | 4.553018000  | -3.502895000 | 0.631854000  |
| C | 6.498524000  | -1.984577000 | 0.052494000  |
| H | 7.156315000  | -2.140499000 | -0.808712000 |
| H | 6.818196000  | -1.079885000 | 0.580263000  |
| H | 6.582574000  | -2.837386000 | 0.728618000  |
| C | 4.851348000  | -0.708506000 | -1.284711000 |
| H | 5.553132000  | -0.744180000 | -2.124185000 |
| H | 3.831926000  | -0.760308000 | -1.666380000 |
| H | 4.986061000  | 0.236138000  | -0.749716000 |
| N | 5.116947000  | -1.832260000 | -0.394219000 |
| O | 0.909748000  | -1.020162000 | 2.959729000  |
| C | 2.079685000  | -0.800324000 | 2.627072000  |
| N | 2.667151000  | 0.416056000  | 2.576257000  |
| C | 1.940788000  | 1.619531000  | 2.953186000  |
| H | 2.533978000  | 2.199968000  | 3.668370000  |
| H | 1.741120000  | 2.242785000  | 2.074990000  |
| H | 0.996035000  | 1.335256000  | 3.416535000  |
| C | 4.043915000  | 0.581785000  | 2.136707000  |
| H | 4.087105000  | 1.242029000  | 1.263802000  |
| H | 4.651026000  | 1.021812000  | 2.936812000  |
| H | 4.467421000  | -0.386804000 | 1.863448000  |
| H | 2.769794000  | -1.613712000 | 2.348147000  |
| O | -3.278215000 | 0.689133000  | 0.535808000  |
| C | -4.407495000 | 0.493011000  | 1.255050000  |
| C | -5.457554000 | 1.490983000  | 0.860171000  |
| H | -5.019804000 | 2.478290000  | 0.694795000  |
| H | -5.903506000 | 1.147748000  | -0.080061000 |
| H | -6.232600000 | 1.534648000  | 1.626124000  |
| O | -4.546073000 | -0.395661000 | 2.073621000  |
| H | -2.259408000 | -0.625964000 | 1.747300000  |

## C<sub>2a</sub>

|    |              |              |              |
|----|--------------|--------------|--------------|
| Pd | -1.652070000 | -0.556726000 | -0.792893000 |
| C  | -4.784624000 | 0.122997000  | -0.487469000 |
| O  | -3.824999000 | -0.406544000 | -1.097578000 |
| C  | 7.201102000  | 0.427021000  | -1.056248000 |
| C  | 6.308107000  | -0.465958000 | -0.233040000 |
| O  | 6.697517000  | -1.127893000 | 0.708497000  |
| O  | 4.994810000  | -0.538817000 | -0.555026000 |
| H  | 8.236154000  | 0.241065000  | -0.770173000 |
| H  | 7.074997000  | 0.248508000  | -2.128029000 |
| H  | 6.961592000  | 1.478279000  | -0.861844000 |
| C  | -0.485706000 | 1.750790000  | 3.087234000  |
| C  | -0.002767000 | 0.806326000  | 2.013896000  |
| O  | 0.111394000  | -0.392267000 | 2.136091000  |
| O  | 0.265248000  | 1.515638000  | 0.888040000  |
| H  | -0.768255000 | 1.186164000  | 3.976026000  |
| H  | 0.310410000  | 2.459439000  | 3.337101000  |
| H  | -1.340490000 | 2.328542000  | 2.724474000  |
| C  | 2.918645000  | 0.272111000  | -1.487727000 |
| C  | 1.128109000  | -1.285801000 | -1.367385000 |
| C  | 2.359210000  | 0.928670000  | -0.221724000 |

|   |              |              |              |
|---|--------------|--------------|--------------|
| C | 0.825876000  | 0.940366000  | -0.318906000 |
| C | 0.299027000  | -0.409694000 | -0.775803000 |
| O | 2.460068000  | -1.076828000 | -1.633542000 |
| C | 4.433046000  | 0.269594000  | -1.604930000 |
| H | 0.822426000  | -2.271478000 | -1.699558000 |
| H | 0.563151000  | 1.692834000  | -1.067411000 |
| H | 2.546959000  | 0.865350000  | -2.337894000 |
| H | 4.783311000  | 1.303070000  | -1.542325000 |
| H | 4.717554000  | -0.146625000 | -2.576869000 |
| I | -1.707598000 | -3.061707000 | 0.116866000  |
| H | -5.747015000 | 0.221940000  | -1.003274000 |
| C | -5.988137000 | 1.163633000  | 1.348297000  |
| H | -6.270051000 | 0.592138000  | 2.238009000  |
| H | -5.807670000 | 2.203880000  | 1.636266000  |
| H | -6.807520000 | 1.128749000  | 0.628384000  |
| C | -3.588900000 | 0.527738000  | 1.606413000  |
| H | -3.723259000 | 1.203608000  | 2.450863000  |
| H | -3.432106000 | -0.489433000 | 1.976352000  |
| H | -2.704143000 | 0.840339000  | 1.045033000  |
| N | -4.776570000 | 0.597794000  | 0.755971000  |
| O | -0.911152000 | 2.645709000  | -2.701428000 |
| C | -1.854889000 | 2.756264000  | -1.910929000 |
| N | -1.860553000 | 3.518760000  | -0.795641000 |
| C | -0.704212000 | 4.321480000  | -0.425947000 |
| H | -0.997314000 | 5.371695000  | -0.315880000 |
| H | -0.284407000 | 3.965184000  | 0.519731000  |
| H | 0.049925000  | 4.237884000  | -1.208655000 |
| C | -3.028441000 | 3.609144000  | 0.065810000  |
| H | -2.766726000 | 3.329578000  | 1.091589000  |
| H | -3.419267000 | 4.633715000  | 0.076969000  |
| H | -3.810472000 | 2.936916000  | -0.292867000 |
| H | -2.808153000 | 2.218022000  | -2.059534000 |
| O | 2.738056000  | 0.190532000  | 0.946848000  |
| C | 3.755783000  | 0.671996000  | 1.699791000  |
| C | 4.110595000  | -0.297188000 | 2.789792000  |
| H | 3.223559000  | -0.802563000 | 3.176820000  |
| H | 4.779097000  | -1.046955000 | 2.350886000  |
| H | 4.640456000  | 0.222449000  | 3.589306000  |
| O | 4.318337000  | 1.728184000  | 1.485663000  |
| H | 2.729874000  | 1.953051000  | -0.143891000 |

## DI<sub>2a</sub>

|    |              |              |              |
|----|--------------|--------------|--------------|
| Pd | 1.762961000  | -0.503443000 | -0.315807000 |
| C  | 2.126588000  | 2.474186000  | -0.414062000 |
| O  | 1.688601000  | 1.487835000  | -1.063362000 |
| C  | -7.183073000 | -1.290798000 | -0.854823000 |
| C  | -6.312153000 | -0.079538000 | -1.073240000 |
| O  | -6.747899000 | 1.036079000  | -1.279924000 |
| O  | -4.967562000 | -0.236146000 | -1.039001000 |
| H  | -8.219026000 | -1.014138000 | -1.049440000 |
| H  | -6.892631000 | -2.118883000 | -1.508210000 |
| H  | -7.096546000 | -1.638286000 | 0.180425000  |
| C  | -0.057796000 | 3.016624000  | 2.222352000  |
| C  | -0.572052000 | 2.041101000  | 1.191943000  |
| O  | -0.884582000 | 2.333767000  | 0.060978000  |
| O  | -0.595060000 | 0.789857000  | 1.722772000  |
| H  | -0.147494000 | 4.032461000  | 1.836935000  |
| H  | -0.614543000 | 2.918926000  | 3.158610000  |
| H  | 0.993779000  | 2.799965000  | 2.438790000  |
| C  | -2.889037000 | -1.321712000 | -0.422227000 |

|   |              |              |              |
|---|--------------|--------------|--------------|
| C | -0.893236000 | -0.737115000 | -1.512109000 |
| C | -2.533296000 | -0.466614000 | 0.798558000  |
| C | -0.980624000 | -0.373913000 | 0.938711000  |
| C | -0.242466000 | -0.536278000 | -0.363134000 |
| O | -2.264399000 | -0.853780000 | -1.621473000 |
| C | -4.373126000 | -1.501185000 | -0.692149000 |
| H | -0.410697000 | -0.841090000 | -2.480073000 |
| H | -0.685200000 | -1.177467000 | 1.614903000  |
| H | -2.505596000 | -2.331282000 | -0.206618000 |
| H | -4.836451000 | -1.919804000 | 0.205079000  |
| H | -4.499096000 | -2.203310000 | -1.522452000 |
| O | -3.088165000 | 0.847829000  | 0.696098000  |
| C | -4.249550000 | 1.104974000  | 1.338942000  |
| H | -2.942385000 | -0.947361000 | 1.690251000  |
| C | -4.711033000 | 2.502173000  | 1.037693000  |
| H | -5.237648000 | 2.472514000  | 0.076699000  |
| H | -5.403742000 | 2.840449000  | 1.809526000  |
| H | -3.863517000 | 3.185310000  | 0.949126000  |
| O | -4.841963000 | 0.298450000  | 2.030420000  |
| I | 4.702309000  | -0.160866000 | -0.042727000 |
| C | -0.085205000 | -3.790457000 | 1.247472000  |
| C | 1.911404000  | -2.463880000 | 1.038058000  |
| C | 0.466787000  | -4.607463000 | 0.092397000  |
| C | 1.043605000  | -3.676124000 | -0.983944000 |
| C | 2.018231000  | -2.721005000 | -0.323440000 |
| O | 0.911357000  | -2.885992000 | 1.822657000  |
| H | 2.730873000  | -2.049930000 | 1.618596000  |
| H | 0.232719000  | -3.137229000 | -1.481112000 |
| H | -0.934618000 | -3.185185000 | 0.923708000  |
| H | -0.343956000 | -5.223727000 | -0.308346000 |
| H | 1.570883000  | -4.249604000 | -1.751790000 |
| H | 1.248084000  | -5.282525000 | 0.460984000  |
| H | 3.014469000  | -2.636406000 | -0.746674000 |
| H | -0.401122000 | -4.414990000 | 2.085239000  |
| H | 2.770495000  | 2.341068000  | 0.459776000  |
| N | 1.855867000  | 3.733215000  | -0.731199000 |
| C | 2.448767000  | 4.842918000  | 0.007125000  |
| H | 3.049502000  | 5.460620000  | -0.668438000 |
| H | 1.658711000  | 5.462338000  | 0.443119000  |
| H | 3.089141000  | 4.463360000  | 0.805222000  |
| C | 0.972842000  | 4.070870000  | -1.842672000 |
| H | 0.250294000  | 4.819375000  | -1.507280000 |
| H | 1.556069000  | 4.485184000  | -2.672311000 |
| H | 0.443567000  | 3.177603000  | -2.166215000 |

## DII<sub>2a</sub>

|    |              |              |              |
|----|--------------|--------------|--------------|
| Pd | -1.548900000 | -0.037555000 | -0.685478000 |
| C  | 0.074928000  | -2.566457000 | 0.017795000  |
| O  | -0.276008000 | -1.802567000 | -0.912787000 |
| C  | 5.076567000  | -0.439696000 | -2.546398000 |
| C  | 5.123516000  | -0.441210000 | -1.039216000 |
| O  | 5.376273000  | -1.433459000 | -0.381764000 |
| O  | 4.950009000  | 0.724232000  | -0.371156000 |
| H  | 5.289906000  | -1.449885000 | -2.895183000 |
| H  | 4.097320000  | -0.121219000 | -2.907382000 |
| H  | 5.826438000  | 0.249010000  | -2.950685000 |
| C  | -0.822453000 | 0.947035000  | 3.648728000  |
| C  | -0.161109000 | 0.621711000  | 2.333972000  |
| O  | 0.052487000  | -0.506878000 | 1.939664000  |
| O  | 0.112046000  | 1.761551000  | 1.664268000  |

|   |              |              |              |
|---|--------------|--------------|--------------|
| H | -0.718914000 | 0.099791000  | 4.327836000  |
| H | -0.402126000 | 1.850004000  | 4.096204000  |
| H | -1.889164000 | 1.123014000  | 3.466772000  |
| C | 2.858073000  | 1.942930000  | -0.929006000 |
| C | 1.027276000  | 0.645755000  | -1.766589000 |
| C | 2.243351000  | 1.715880000  | 0.452302000  |
| C | 0.713862000  | 1.852323000  | 0.343197000  |
| C | 0.208962000  | 0.944265000  | -0.750746000 |
| O | 2.358202000  | 1.002015000  | -1.886711000 |
| C | 4.382618000  | 1.901496000  | -0.972614000 |
| H | 0.737081000  | 0.031084000  | -2.610858000 |
| H | 0.494801000  | 2.892408000  | 0.090561000  |
| H | 2.572869000  | 2.956108000  | -1.250125000 |
| H | 4.767138000  | 2.735978000  | -0.381646000 |
| H | 4.720230000  | 2.031386000  | -2.004264000 |
| O | 2.562668000  | 0.387509000  | 0.882267000  |
| C | 3.046090000  | 0.209840000  | 2.133028000  |
| H | 2.635080000  | 2.444216000  | 1.165370000  |
| C | 3.340185000  | -1.243035000 | 2.362712000  |
| H | 4.116423000  | -1.559121000 | 1.658628000  |
| H | 3.670036000  | -1.400592000 | 3.389952000  |
| H | 2.434327000  | -1.818730000 | 2.160525000  |
| O | 3.205157000  | 1.108955000  | 2.935214000  |
| I | -3.778656000 | -1.800596000 | -0.146058000 |
| C | -2.227957000 | 4.096597000  | 0.027083000  |
| C | -2.032770000 | 2.364550000  | -1.616854000 |
| C | -2.870855000 | 3.080714000  | 0.956440000  |
| C | -3.778107000 | 2.132051000  | 0.168397000  |
| C | -3.047697000 | 1.604219000  | -1.048741000 |
| O | -1.524275000 | 3.476500000  | -1.103767000 |
| H | -1.616178000 | 2.134883000  | -2.592327000 |
| H | -4.675547000 | 2.666410000  | -0.172895000 |
| H | -2.975468000 | 4.765614000  | -0.412406000 |
| H | -3.436213000 | 3.628194000  | 1.717383000  |
| H | -4.120311000 | 1.306334000  | 0.797002000  |
| H | -2.089216000 | 2.515996000  | 1.467283000  |
| H | -3.596967000 | 0.975808000  | -1.745842000 |
| H | -1.466860000 | 4.695971000  | 0.528743000  |
| H | -0.593137000 | -2.799432000 | 0.851289000  |
| N | 1.264967000  | -3.163949000 | 0.051755000  |
| C | 1.542938000  | -4.239053000 | 0.997624000  |
| H | 1.607240000  | -5.198511000 | 0.471881000  |
| H | 2.494220000  | -4.054259000 | 1.504525000  |
| H | 0.746234000  | -4.294679000 | 1.742462000  |
| C | 2.282121000  | -2.872181000 | -0.955777000 |
| H | 3.265592000  | -2.868198000 | -0.482290000 |
| H | 2.269007000  | -3.629680000 | -1.748557000 |
| H | 2.089901000  | -1.890416000 | -1.385007000 |

## DIII<sub>2a</sub>

|    |              |              |              |
|----|--------------|--------------|--------------|
| Pd | -1.637742000 | -0.435726000 | -0.325218000 |
| C  | -2.096543000 | 2.466074000  | -0.612212000 |
| O  | -1.814703000 | 1.473361000  | -1.337359000 |
| C  | 7.233289000  | 0.341806000  | -1.192539000 |
| C  | 6.302392000  | -0.537262000 | -0.396108000 |
| O  | 6.665427000  | -1.252634000 | 0.516661000  |
| O  | 4.985634000  | -0.534448000 | -0.710719000 |
| H  | 8.259572000  | 0.102654000  | -0.914440000 |
| H  | 7.098312000  | 0.200853000  | -2.268926000 |
| H  | 7.040538000  | 1.396385000  | -0.966966000 |

|   |              |              |              |
|---|--------------|--------------|--------------|
| C | -0.619446000 | 2.328398000  | 2.881695000  |
| C | 0.112924000  | 1.320069000  | 2.032125000  |
| O | 0.368566000  | 0.187353000  | 2.386569000  |
| O | 0.389893000  | 1.861416000  | 0.827122000  |
| H | -0.455245000 | 2.109203000  | 3.937825000  |
| H | -0.316409000 | 3.350966000  | 2.649380000  |
| H | -1.691040000 | 2.233509000  | 2.669927000  |
| C | 2.946134000  | 0.447173000  | -1.567010000 |
| C | 1.082408000  | -1.040510000 | -1.392915000 |
| C | 2.457427000  | 1.067936000  | -0.251894000 |
| C | 0.930907000  | 1.148077000  | -0.317693000 |
| C | 0.335776000  | -0.199586000 | -0.665753000 |
| O | 2.390607000  | -0.852723000 | -1.788649000 |
| C | 4.454579000  | 0.347824000  | -1.716414000 |
| H | 0.737662000  | -2.006593000 | -1.739738000 |
| H | 0.688788000  | 1.850478000  | -1.118601000 |
| H | 2.610162000  | 1.119578000  | -2.371384000 |
| H | 4.873962000  | 1.352956000  | -1.625578000 |
| H | 4.690546000  | -0.049014000 | -2.709407000 |
| I | -4.509651000 | -0.287723000 | 0.174788000  |
| C | -0.062601000 | -4.416415000 | -0.437634000 |
| C | -0.256677000 | -2.450153000 | 0.934437000  |
| C | -1.391040000 | -4.028996000 | -1.063715000 |
| C | -2.334987000 | -3.479227000 | 0.009533000  |
| C | -1.638893000 | -2.362528000 | 0.768441000  |
| O | 0.529163000  | -3.333949000 | 0.363096000  |
| H | 0.284795000  | -1.765875000 | 1.578230000  |
| H | -2.600809000 | -4.279149000 | 0.714848000  |
| H | -0.174926000 | -5.265408000 | 0.244139000  |
| H | -1.809352000 | -4.918118000 | -1.545955000 |
| H | -3.266218000 | -3.124058000 | -0.435130000 |
| H | -1.233162000 | -3.274534000 | -1.842525000 |
| H | -2.154211000 | -1.913476000 | 1.616662000  |
| H | 0.700539000  | -4.656240000 | -1.179207000 |
| H | 2.886086000  | 2.065963000  | -0.137556000 |
| O | 2.824053000  | 0.252009000  | 0.868541000  |
| C | 3.865369000  | 0.650173000  | 1.632771000  |
| O | 4.477108000  | 1.687650000  | 1.462617000  |
| C | 4.177451000  | -0.383865000 | 2.675442000  |
| H | 3.263763000  | -0.841471000 | 3.060300000  |
| H | 4.785353000  | -1.158564000 | 2.194175000  |
| H | 4.754768000  | 0.066919000  | 3.483770000  |
| H | -2.622021000 | 2.341015000  | 0.338285000  |
| N | -1.804419000 | 3.720219000  | -0.932707000 |
| C | -1.081562000 | 4.062562000  | -2.153378000 |
| H | -1.688381000 | 4.739990000  | -2.762518000 |
| H | -0.143773000 | 4.564783000  | -1.894641000 |
| H | -0.868979000 | 3.157215000  | -2.719899000 |
| C | -2.159448000 | 4.823080000  | -0.045610000 |
| H | -1.252049000 | 5.343587000  | 0.278023000  |
| H | -2.805379000 | 5.532787000  | -0.572020000 |
| H | -2.685069000 | 4.442775000  | 0.831700000  |

## DIV<sub>2a</sub>

|    |              |              |              |
|----|--------------|--------------|--------------|
| Pd | -1.610959000 | -0.379295000 | -0.423463000 |
| C  | -2.613211000 | 2.449207000  | -0.208521000 |
| O  | -1.978639000 | 1.672057000  | -0.969285000 |
| C  | 7.023841000  | 1.608595000  | -0.672394000 |
| C  | 6.247868000  | 0.322586000  | -0.804973000 |
| O  | 6.741659000  | -0.779605000 | -0.672868000 |

|   |              |              |              |
|---|--------------|--------------|--------------|
| O | 4.924101000  | 0.390006000  | -1.083524000 |
| H | 8.083423000  | 1.367005000  | -0.591320000 |
| H | 6.859913000  | 2.270997000  | -1.527480000 |
| H | 6.710915000  | 2.143650000  | 0.230606000  |
| C | -0.716826000 | -0.113005000 | 3.787578000  |
| C | -0.526777000 | 0.728386000  | 2.555928000  |
| O | -1.288923000 | 1.600623000  | 2.180270000  |
| O | 0.595152000  | 0.369149000  | 1.899017000  |
| H | -1.128240000 | -1.081888000 | 3.481393000  |
| H | 0.234400000  | -0.297796000 | 4.291816000  |
| H | -1.420803000 | 0.373633000  | 4.463426000  |
| C | 2.755318000  | 1.452880000  | -0.942668000 |
| C | 0.981342000  | 0.053848000  | -1.679299000 |
| C | 2.396680000  | 1.018045000  | 0.482135000  |
| C | 0.870887000  | 0.972192000  | 0.609412000  |
| C | 0.295937000  | 0.182278000  | -0.539100000 |
| O | 2.247720000  | 0.541187000  | -1.923182000 |
| C | 4.238427000  | 1.649693000  | -1.204609000 |
| H | 0.613997000  | -0.491658000 | -2.542403000 |
| H | 0.474589000  | 1.991614000  | 0.622835000  |
| H | 2.285454000  | 2.437471000  | -1.094232000 |
| H | 4.615238000  | 2.385512000  | -0.490543000 |
| H | 4.377667000  | 2.034752000  | -2.220021000 |
| I | -4.471287000 | -0.856447000 | -0.227942000 |
| C | 1.166252000  | -3.183740000 | -1.122130000 |
| C | -1.163599000 | -2.593075000 | -1.056935000 |
| C | 0.944047000  | -3.751101000 | 0.268456000  |
| C | 0.113590000  | -2.764717000 | 1.103055000  |
| C | -1.144998000 | -2.409512000 | 0.326465000  |
| O | -0.098766000 | -2.897490000 | -1.804277000 |
| H | -2.089105000 | -2.679387000 | -1.620262000 |
| H | 0.710191000  | -1.880469000 | 1.328519000  |
| H | 1.738200000  | -2.254807000 | -1.074251000 |
| H | 1.922156000  | -3.931724000 | 0.724955000  |
| H | -0.175641000 | -3.212153000 | 2.058800000  |
| H | 0.428159000  | -4.715979000 | 0.194471000  |
| H | -2.100372000 | -2.535738000 | 0.827389000  |
| H | 1.674634000  | -3.887191000 | -1.784355000 |
| H | 2.825916000  | 1.715103000  | 1.203869000  |
| O | 2.886675000  | -0.311154000 | 0.741170000  |
| C | 4.008305000  | -0.438268000 | 1.489132000  |
| O | 4.593294000  | 0.498193000  | 1.997828000  |
| C | 4.442486000  | -1.873383000 | 1.553548000  |
| H | 4.986165000  | -2.090946000 | 0.627440000  |
| H | 5.115321000  | -2.018470000 | 2.399536000  |
| H | 3.585725000  | -2.546948000 | 1.622219000  |
| H | -3.326512000 | 2.070558000  | 0.526627000  |
| N | -2.486830000 | 3.770732000  | -0.251577000 |
| C | -1.547466000 | 4.427494000  | -1.154662000 |
| H | -2.093167000 | 5.026680000  | -1.891143000 |
| H | -0.893171000 | 5.088534000  | -0.577605000 |
| H | -0.948134000 | 3.677110000  | -1.668170000 |
| C | -3.286525000 | 4.635629000  | 0.608715000  |
| H | -2.628314000 | 5.242506000  | 1.239029000  |
| H | -3.903785000 | 5.303097000  | -0.001653000 |
| H | -3.936374000 | 4.033149000  | 1.245796000  |

### TS2I<sub>2a</sub>

|    |              |              |              |
|----|--------------|--------------|--------------|
| Pd | 1.666834000  | -0.178235000 | -0.148926000 |
| C  | -0.187018000 | 2.238252000  | -0.856598000 |

|   |              |              |              |
|---|--------------|--------------|--------------|
| O | 0.295390000  | 1.166083000  | -1.278605000 |
| C | -6.690274000 | -0.711396000 | -0.508417000 |
| C | -5.494041000 | 0.050677000  | -1.017871000 |
| O | -5.535693000 | 1.218382000  | -1.356663000 |
| O | -4.300361000 | -0.582981000 | -1.090111000 |
| H | -7.577977000 | -0.095731000 | -0.650901000 |
| H | -6.815876000 | -1.667157000 | -1.025336000 |
| H | -6.565317000 | -0.916091000 | 0.560118000  |
| C | 0.575212000  | 0.214128000  | 4.104336000  |
| C | 0.050998000  | 0.076198000  | 2.697208000  |
| O | -0.047060000 | 0.993625000  | 1.909670000  |
| O | -0.243474000 | -1.224702000 | 2.454643000  |
| H | 0.566026000  | 1.264319000  | 4.397532000  |
| H | -0.012078000 | -0.382739000 | 4.806180000  |
| H | 1.607275000  | -0.154411000 | 4.131631000  |
| C | -2.683434000 | -2.193155000 | -0.289216000 |
| C | -0.547480000 | -1.656002000 | -1.236261000 |
| C | -2.218980000 | -1.466583000 | 0.978942000  |
| C | -0.731141000 | -1.770500000 | 1.202309000  |
| C | 0.075963000  | -1.500361000 | -0.049201000 |
| O | -1.869614000 | -1.904078000 | -1.441864000 |
| C | -4.134056000 | -1.951204000 | -0.675781000 |
| H | -0.033865000 | -1.570154000 | -2.187697000 |
| H | -0.689671000 | -2.842920000 | 1.425918000  |
| H | -2.598335000 | -3.267890000 | -0.077911000 |
| H | -4.757583000 | -2.193875000 | 0.186586000  |
| H | -4.401553000 | -2.607881000 | -1.509616000 |
| O | -2.395921000 | -0.049384000 | 0.885138000  |
| C | -3.479522000 | 0.489264000  | 1.485219000  |
| H | -2.804056000 | -1.847791000 | 1.819215000  |
| C | -3.481719000 | 1.982547000  | 1.345690000  |
| H | -3.919631000 | 2.225882000  | 0.372495000  |
| H | -4.101566000 | 2.422180000  | 2.128382000  |
| H | -2.465063000 | 2.374812000  | 1.379918000  |
| O | -4.345915000 | -0.167432000 | 2.034687000  |
| I | 3.654998000  | 1.797907000  | -0.072490000 |
| C | 2.951252000  | -2.581662000 | -1.966784000 |
| C | 1.847994000  | -2.754801000 | 0.098984000  |
| C | 4.305550000  | -2.222477000 | -1.351447000 |
| C | 4.190559000  | -1.934108000 | 0.163929000  |
| C | 2.746352000  | -1.764337000 | 0.639106000  |
| O | 2.115646000  | -3.353040000 | -1.063087000 |
| H | 1.243262000  | -3.389379000 | 0.739498000  |
| H | 4.784332000  | -1.062984000 | 0.442580000  |
| H | 2.386976000  | -1.667925000 | -2.203538000 |
| H | 4.678385000  | -1.342516000 | -1.886214000 |
| H | 4.599213000  | -2.788944000 | 0.720644000  |
| H | 5.019088000  | -3.034067000 | -1.520607000 |
| H | 2.639520000  | -1.656139000 | 1.720535000  |
| H | 3.044689000  | -3.193524000 | -2.864530000 |
| H | 0.348416000  | 2.867439000  | -0.137119000 |
| N | -1.373221000 | 2.708580000  | -1.250157000 |
| C | -1.781571000 | 4.073878000  | -0.947324000 |
| H | -1.756806000 | 4.689644000  | -1.854175000 |
| H | -2.799000000 | 4.083622000  | -0.547881000 |
| H | -1.104892000 | 4.508842000  | -0.208414000 |
| C | -2.212038000 | 1.924315000  | -2.152952000 |
| H | -3.262771000 | 2.140518000  | -1.953149000 |
| H | -1.985947000 | 2.163171000  | -3.199951000 |
| H | -2.041495000 | 0.863560000  | -1.974216000 |

TS2H<sub>2a</sub>

|    |              |              |              |
|----|--------------|--------------|--------------|
| Pd | 1.755341000  | 0.170679000  | -0.487062000 |
| C  | -0.663395000 | 2.179426000  | -0.318784000 |
| O  | 0.582287000  | 2.144571000  | -0.400498000 |
| C  | -6.796009000 | -0.510473000 | -0.683666000 |
| C  | -5.642082000 | 0.454780000  | -0.611484000 |
| O  | -5.747655000 | 1.617119000  | -0.272939000 |
| O  | -4.403231000 | 0.007152000  | -0.934961000 |
| H  | -7.722229000 | 0.044161000  | -0.535958000 |
| H  | -6.825302000 | -1.033265000 | -1.644114000 |
| H  | -6.702718000 | -1.264551000 | 0.105330000  |
| C  | 0.878342000  | -1.211781000 | 3.603666000  |
| C  | 0.236572000  | -0.787303000 | 2.307835000  |
| O  | 0.072350000  | 0.363423000  | 1.965457000  |
| O  | -0.076456000 | -1.889567000 | 1.579519000  |
| H  | 0.844655000  | -0.388123000 | 4.317681000  |
| H  | 0.394179000  | -2.098436000 | 4.019125000  |
| H  | 1.926459000  | -1.462686000 | 3.402322000  |
| C  | -2.681037000 | -1.667813000 | -1.157603000 |
| C  | -0.641806000 | -0.666462000 | -1.890006000 |
| C  | -2.124672000 | -1.635655000 | 0.264800000  |
| C  | -0.609076000 | -1.899882000 | 0.232459000  |
| C  | 0.110487000  | -1.094591000 | -0.836989000 |
| O  | -1.976406000 | -0.770266000 | -2.046001000 |
| C  | -4.164143000 | -1.368091000 | -1.287018000 |
| H  | -0.200706000 | -0.175953000 | -2.753473000 |
| H  | -0.503124000 | -2.956846000 | -0.027572000 |
| H  | -2.533605000 | -2.688733000 | -1.533818000 |
| H  | -4.704940000 | -2.050683000 | -0.627781000 |
| H  | -4.480567000 | -1.537258000 | -2.320668000 |
| O  | -2.358414000 | -0.371235000 | 0.893796000  |
| C  | -3.394120000 | -0.263865000 | 1.761789000  |
| H  | -2.617325000 | -2.419549000 | 0.844301000  |
| C  | -3.466161000 | 1.116434000  | 2.347841000  |
| H  | -4.223464000 | 1.677355000  | 1.790287000  |
| H  | -3.788800000 | 1.049354000  | 3.388990000  |
| H  | -2.509290000 | 1.633452000  | 2.271297000  |
| O  | -4.167252000 | -1.170810000 | 1.999874000  |
| I  | 4.073804000  | 1.635826000  | 0.087528000  |
| C  | 2.027071000  | -4.197176000 | -0.324017000 |
| C  | 1.631307000  | -2.191044000 | -1.646769000 |
| C  | 2.721435000  | -3.306301000 | 0.691185000  |
| C  | 3.590643000  | -2.271527000 | -0.022992000 |
| C  | 2.788183000  | -1.508300000 | -1.071405000 |
| O  | 1.288729000  | -3.462524000 | -1.350565000 |
| H  | 1.404400000  | -1.973060000 | -2.684550000 |
| H  | 4.415287000  | -2.788182000 | -0.536708000 |
| H  | 2.756776000  | -4.815774000 | -0.859583000 |
| H  | 3.327957000  | -3.946821000 | 1.340269000  |
| H  | 4.050391000  | -1.586449000 | 0.693886000  |
| H  | 1.978737000  | -2.812152000 | 1.319038000  |
| H  | 3.400793000  | -1.058209000 | -1.857209000 |
| H  | 1.289014000  | -4.854428000 | 0.141499000  |
| H  | -1.253722000 | 1.267579000  | -0.212992000 |
| N  | -1.389139000 | 3.303655000  | -0.338069000 |
| C  | -2.846341000 | 3.250620000  | -0.395794000 |
| H  | -3.282362000 | 3.760279000  | 0.469413000  |
| H  | -3.198266000 | 3.749724000  | -1.305927000 |
| H  | -3.191697000 | 2.217819000  | -0.414129000 |
| C  | -0.765836000 | 4.617583000  | -0.426976000 |
| H  | -0.901736000 | 5.041034000  | -1.429180000 |
| H  | -1.229506000 | 5.289771000  | 0.301803000  |
| H  | 0.299600000  | 4.530643000  | -0.215096000 |

**TS2III<sub>2a</sub>**

|    |              |              |              |
|----|--------------|--------------|--------------|
| Pd | -1.763279000 | -0.393477000 | -0.371708000 |
| C  | -2.258795000 | 2.629678000  | -0.590725000 |
| O  | -1.918758000 | 1.672493000  | -1.323915000 |
| C  | 6.994115000  | 0.838696000  | -1.107739000 |
| C  | 6.056245000  | -0.321272000 | -0.892787000 |
| O  | 6.416709000  | -1.427545000 | -0.545093000 |
| O  | 4.728447000  | -0.124971000 | -1.087342000 |
| H  | 8.018184000  | 0.468857000  | -1.061590000 |
| H  | 6.820697000  | 1.331269000  | -2.068913000 |
| H  | 6.851234000  | 1.584324000  | -0.317881000 |
| C  | -0.875100000 | 1.356497000  | 3.657078000  |
| C  | 0.141730000  | 0.784541000  | 2.705920000  |
| O  | 0.897896000  | -0.130034000 | 2.963788000  |
| O  | 0.067455000  | 1.430270000  | 1.521236000  |
| H  | -0.683213000 | 0.993531000  | 4.666951000  |
| H  | -0.861972000 | 2.449185000  | 3.635692000  |
| H  | -1.870826000 | 1.029240000  | 3.335518000  |
| C  | 2.707214000  | 1.202632000  | -1.157313000 |
| C  | 0.990654000  | -0.470044000 | -1.538461000 |
| C  | 2.291043000  | 1.097476000  | 0.320500000  |
| C  | 0.763098000  | 1.070740000  | 0.304163000  |
| C  | 0.284745000  | -0.186792000 | -0.409316000 |
| O  | 2.090463000  | 0.172732000  | -1.979330000 |
| C  | 4.201926000  | 1.167406000  | -1.429754000 |
| H  | 0.765588000  | -1.311949000 | -2.184124000 |
| H  | 0.465263000  | 1.910807000  | -0.327062000 |
| H  | 2.357386000  | 2.174326000  | -1.524278000 |
| H  | 4.665471000  | 1.962390000  | -0.840164000 |
| H  | 4.376744000  | 1.362382000  | -2.492791000 |
| I  | -4.532607000 | -0.597713000 | -0.012051000 |
| C  | 0.563214000  | -3.804528000 | -1.009499000 |
| C  | 0.207005000  | -1.954997000 | 0.551149000  |
| C  | -0.906195000 | -3.654131000 | -1.379519000 |
| C  | -1.736209000 | -3.411847000 | -0.116773000 |
| C  | -1.249994000 | -2.141332000 | 0.566791000  |
| O  | 1.029683000  | -2.868581000 | 0.005963000  |
| H  | 0.686028000  | -1.509496000 | 1.415938000  |
| H  | -1.608722000 | -4.262123000 | 0.571159000  |
| H  | 0.754371000  | -4.796734000 | -0.587884000 |
| H  | -1.218273000 | -4.564724000 | -1.900763000 |
| H  | -2.801700000 | -3.345132000 | -0.347898000 |
| H  | -1.043127000 | -2.815249000 | -2.072149000 |
| H  | -1.658547000 | -1.965282000 | 1.567303000  |
| H  | 1.219378000  | -3.669248000 | -1.874941000 |
| H  | 2.684117000  | 1.962740000  | 0.858543000  |
| O  | 2.782621000  | -0.117570000 | 0.897081000  |
| C  | 3.902532000  | -0.062310000 | 1.650379000  |
| O  | 4.515612000  | 0.963870000  | 1.875151000  |
| C  | 4.289177000  | -1.435361000 | 2.116028000  |
| H  | 3.413489000  | -1.988810000 | 2.462010000  |
| H  | 4.723063000  | -1.968892000 | 1.263113000  |
| H  | 5.034764000  | -1.361768000 | 2.908423000  |
| H  | -2.975434000 | 2.494246000  | 0.228972000  |
| N  | -1.798054000 | 3.874808000  | -0.725356000 |
| C  | -0.815528000 | 4.222354000  | -1.746194000 |
| H  | -1.244978000 | 4.944176000  | -2.449325000 |
| H  | 0.062094000  | 4.673851000  | -1.272145000 |
| H  | -0.518921000 | 3.324036000  | -2.286066000 |

|   |              |             |              |
|---|--------------|-------------|--------------|
| C | -2.258287000 | 4.953658000 | 0.140119000  |
| H | -1.408181000 | 5.393676000 | 0.672048000  |
| H | -2.741036000 | 5.734950000 | -0.456602000 |
| H | -2.974108000 | 4.568776000 | 0.869102000  |

### TS2IV<sub>2a</sub>

|    |              |              |              |
|----|--------------|--------------|--------------|
| Pd | -1.783064000 | -0.117048000 | -0.775280000 |
| C  | -1.991649000 | 2.730092000  | 0.308645000  |
| O  | -1.661069000 | 2.146370000  | -0.749773000 |
| C  | 6.948695000  | 1.581271000  | -0.543089000 |
| C  | 6.155004000  | 0.407840000  | -1.058267000 |
| O  | 6.647671000  | -0.660726000 | -1.359005000 |
| O  | 4.812548000  | 0.543190000  | -1.192948000 |
| H  | 8.009307000  | 1.349495000  | -0.637134000 |
| H  | 6.720015000  | 2.498632000  | -1.093477000 |
| H  | 6.716805000  | 1.756887000  | 0.512986000  |
| C  | -0.566962000 | -1.132381000 | 3.739683000  |
| C  | -0.473336000 | -0.160607000 | 2.595114000  |
| O  | -1.153753000 | 0.837586000  | 2.461168000  |
| O  | 0.499530000  | -0.535969000 | 1.727877000  |
| H  | -0.673506000 | -2.155767000 | 3.369694000  |
| H  | 0.357753000  | -1.089982000 | 4.324615000  |
| H  | -1.414960000 | -0.874524000 | 4.374100000  |
| C  | 2.661193000  | 1.453038000  | -0.574685000 |
| C  | 0.985404000  | 0.250827000  | -1.803441000 |
| C  | 2.332187000  | 0.504751000  | 0.581859000  |
| C  | 0.815309000  | 0.348000000  | 0.633010000  |
| C  | 0.284417000  | -0.134864000 | -0.704465000 |
| O  | 2.119201000  | 0.982393000  | -1.831337000 |
| C  | 4.135079000  | 1.745859000  | -0.790319000 |
| H  | 0.703311000  | -0.034984000 | -2.813001000 |
| H  | 0.382422000  | 1.325282000  | 0.859285000  |
| H  | 2.185976000  | 2.414431000  | -0.340572000 |
| H  | 4.535482000  | 2.141734000  | 0.145889000  |
| H  | 4.244025000  | 2.503035000  | -1.573692000 |
| I  | -4.580755000 | -0.166300000 | -0.638044000 |
| C  | 0.500498000  | -3.517057000 | 0.759451000  |
| C  | -0.099833000 | -2.162977000 | -1.135822000 |
| C  | -0.937382000 | -4.011608000 | 0.794623000  |
| C  | -1.902442000 | -2.848406000 | 0.516316000  |
| C  | -1.518517000 | -2.152533000 | -0.789665000 |
| O  | 0.824911000  | -2.901304000 | -0.518114000 |
| H  | 0.140117000  | -2.070601000 | -2.189306000 |
| H  | -1.867504000 | -2.152122000 | 1.359091000  |
| H  | 0.698938000  | -2.781822000 | 1.541140000  |
| H  | -1.128577000 | -4.455770000 | 1.777496000  |
| H  | -2.936650000 | -3.197060000 | 0.449146000  |
| H  | -1.067677000 | -4.799628000 | 0.042762000  |
| H  | -2.112327000 | -2.459235000 | -1.656252000 |
| H  | 1.217308000  | -4.335690000 | 0.850511000  |
| H  | 2.714393000  | 0.931116000  | 1.511741000  |
| O  | 2.888823000  | -0.801254000 | 0.374434000  |
| C  | 4.048115000  | -1.111545000 | 0.998138000  |
| O  | 4.635371000  | -0.358853000 | 1.751414000  |
| C  | 4.513569000  | -2.478707000 | 0.589168000  |
| H  | 5.085758000  | -2.361065000 | -0.338397000 |
| H  | 5.169653000  | -2.893204000 | 1.355887000  |
| H  | 3.668830000  | -3.142856000 | 0.396016000  |
| H  | -2.862901000 | 2.407294000  | 0.889112000  |
| N  | -1.341052000 | 3.779633000  | 0.813369000  |

|   |              |             |              |
|---|--------------|-------------|--------------|
| C | -0.124076000 | 4.293410000 | 0.195766000  |
| H | -0.278295000 | 5.323694000 | -0.142668000 |
| H | 0.689748000  | 4.284210000 | 0.928590000  |
| H | 0.142181000  | 3.667747000 | -0.655229000 |
| C | -1.779667000 | 4.422713000 | 2.044945000  |
| H | -0.999535000 | 4.338253000 | 2.809314000  |
| H | -1.981501000 | 5.483917000 | 1.864628000  |
| H | -2.689757000 | 3.945126000 | 2.411854000  |

### El<sub>2a</sub>

|    |              |              |              |
|----|--------------|--------------|--------------|
| Pd | 2.788335000  | 0.117911000  | -0.293987000 |
| O  | 1.412659000  | -1.456754000 | -0.573917000 |
| C  | 0.305444000  | -1.292181000 | -1.164022000 |
| C  | -6.589847000 | -2.147942000 | 1.557823000  |
| C  | -5.472672000 | -2.221588000 | 0.550413000  |
| O  | -5.563311000 | -2.770096000 | -0.529366000 |
| O  | -4.286399000 | -1.641756000 | 0.860489000  |
| H  | -7.404629000 | -2.787851000 | 1.219815000  |
| H  | -6.258186000 | -2.462803000 | 2.551577000  |
| H  | -6.955107000 | -1.118190000 | 1.634221000  |
| C  | -2.101266000 | 3.614857000  | -2.591973000 |
| C  | -1.649940000 | 2.572245000  | -1.603868000 |
| O  | -1.078828000 | 1.541945000  | -1.900195000 |
| O  | -1.963436000 | 2.962716000  | -0.346953000 |
| H  | -3.196169000 | 3.618582000  | -2.628802000 |
| H  | -1.777386000 | 4.610853000  | -2.277891000 |
| H  | -1.704148000 | 3.381188000  | -3.579977000 |
| C  | -2.933750000 | 0.075562000  | 1.879129000  |
| C  | -0.634803000 | 0.011074000  | 1.347375000  |
| C  | -3.142988000 | 1.195316000  | 0.859237000  |
| C  | -1.874939000 | 2.073558000  | 0.800788000  |
| C  | -0.595960000 | 1.291264000  | 0.955708000  |
| O  | -1.766606000 | -0.710257000 | 1.588830000  |
| C  | -4.101633000 | -0.876118000 | 2.065096000  |
| H  | 0.260558000  | -0.570782000 | 1.531195000  |
| H  | -1.940060000 | 2.784954000  | 1.631053000  |
| H  | -2.781469000 | 0.572162000  | 2.849492000  |
| H  | -4.988856000 | -0.287539000 | 2.306916000  |
| H  | -3.883723000 | -1.557852000 | 2.892972000  |
| I  | 5.069456000  | -1.590416000 | -0.108365000 |
| C  | 2.703841000  | 2.378590000  | 2.314803000  |
| C  | 0.713937000  | 2.051562000  | 0.919589000  |
| C  | 3.165168000  | 3.208952000  | 1.122797000  |
| C  | 2.958860000  | 2.431443000  | -0.176525000 |
| C  | 1.620622000  | 1.797615000  | -0.279301000 |
| O  | 1.385441000  | 1.812492000  | 2.165277000  |
| H  | 0.451932000  | 3.124990000  | 0.849062000  |
| H  | 3.795262000  | 1.572535000  | -0.142336000 |
| H  | 3.403031000  | 1.543032000  | 2.459891000  |
| H  | 4.214085000  | 3.485389000  | 1.262259000  |
| H  | 3.273323000  | 2.964925000  | -1.076711000 |
| H  | 2.586212000  | 4.137787000  | 1.053808000  |
| H  | 1.104235000  | 1.875509000  | -1.233641000 |
| H  | 2.707869000  | 2.985823000  | 3.228166000  |
| H  | -3.993102000 | 1.803733000  | 1.174428000  |
| O  | -3.402227000 | 0.686766000  | -0.457292000 |
| C  | -4.693077000 | 0.620322000  | -0.866275000 |
| C  | -4.786084000 | 0.089188000  | -2.267536000 |
| H  | -3.936905000 | 0.411809000  | -2.872519000 |
| H  | -4.785196000 | -1.005252000 | -2.212776000 |

|   |              |              |              |
|---|--------------|--------------|--------------|
| H | -5.725771000 | 0.413873000  | -2.716763000 |
| O | -5.638783000 | 0.924624000  | -0.165663000 |
| H | 0.120375000  | -0.427733000 | -1.802598000 |
| N | -0.709293000 | -2.135912000 | -1.053789000 |
| C | -0.669620000 | -3.298663000 | -0.173709000 |
| H | -1.428158000 | -3.178876000 | 0.605284000  |
| H | -0.885076000 | -4.203326000 | -0.750666000 |
| H | 0.315567000  | -3.383613000 | 0.281950000  |
| C | -1.970322000 | -1.880922000 | -1.746580000 |
| H | -2.160743000 | -2.672860000 | -2.478740000 |
| H | -2.779147000 | -1.857912000 | -1.014982000 |
| H | -1.922075000 | -0.915263000 | -2.247914000 |

## Et<sub>2</sub>a

|    |              |              |              |
|----|--------------|--------------|--------------|
| Pd | -2.508575000 | -0.058877000 | -0.758845000 |
| C  | -0.070510000 | -1.783409000 | -0.465903000 |
| O  | -0.856191000 | -1.282194000 | -1.312791000 |
| C  | 6.798552000  | -0.640954000 | -0.384192000 |
| C  | 5.458755000  | -1.324341000 | -0.290994000 |
| O  | 5.283529000  | -2.387342000 | 0.273498000  |
| O  | 4.382140000  | -0.734134000 | -0.862693000 |
| H  | 7.557787000  | -1.319576000 | 0.004042000  |
| H  | 7.040361000  | -0.365550000 | -1.414914000 |
| H  | 6.794533000  | 0.271197000  | 0.221122000  |
| C  | -0.178523000 | 1.883472000  | 3.433859000  |
| C  | 0.118066000  | 1.549838000  | 1.993511000  |
| O  | -0.349124000 | 0.598585000  | 1.399033000  |
| O  | 0.950449000  | 2.471108000  | 1.474657000  |
| H  | -0.745711000 | 1.071625000  | 3.889790000  |
| H  | 0.749365000  | 2.050566000  | 3.988070000  |
| H  | -0.762802000 | 2.808614000  | 3.479096000  |
| C  | 3.135937000  | 1.292094000  | -1.332481000 |
| C  | 0.857593000  | 1.046788000  | -1.879320000 |
| C  | 2.738183000  | 1.647936000  | 0.094017000  |
| C  | 1.401158000  | 2.423778000  | 0.095248000  |
| C  | 0.435675000  | 1.920401000  | -0.955744000 |
| O  | 2.118088000  | 0.527741000  | -1.985318000 |
| C  | 4.458513000  | 0.562617000  | -1.484235000 |
| H  | 0.217947000  | 0.654548000  | -2.658952000 |
| H  | 1.631027000  | 3.475275000  | -0.105024000 |
| H  | 3.251527000  | 2.248695000  | -1.866839000 |
| H  | 5.236976000  | 1.181762000  | -1.036033000 |
| H  | 4.678397000  | 0.426705000  | -2.547758000 |
| I  | -3.801210000 | -2.093015000 | 0.762988000  |
| C  | -3.435786000 | 1.987726000  | -1.366909000 |
| C  | -0.935690000 | 2.588504000  | -1.098753000 |
| C  | -3.654924000 | 3.133212000  | -0.379664000 |
| C  | -2.568305000 | 3.072580000  | 0.680351000  |
| H  | -0.821437000 | 3.398950000  | -1.842345000 |
| H  | -2.621071000 | 2.106678000  | 1.208608000  |
| H  | -3.884156000 | 1.039146000  | -0.774062000 |
| H  | -4.645113000 | 3.069599000  | 0.081458000  |
| H  | -2.685988000 | 3.870697000  | 1.418790000  |
| H  | -3.591169000 | 4.084313000  | -0.920802000 |
| H  | -4.099621000 | 1.999352000  | -2.234312000 |
| H  | 3.517822000  | 2.268520000  | 0.539039000  |
| O  | 2.562899000  | 0.474032000  | 0.906119000  |
| C  | 3.525060000  | 0.195416000  | 1.813442000  |
| C  | 3.135535000  | -0.954742000 | 2.698034000  |
| H  | 3.499118000  | -0.763017000 | 3.709864000  |

|   |              |              |              |
|---|--------------|--------------|--------------|
| H | 2.057393000  | -1.114850000 | 2.702602000  |
| H | 3.633170000  | -1.854619000 | 2.323574000  |
| O | 4.583421000  | 0.792410000  | 1.884743000  |
| H | -0.271443000 | -1.718839000 | 0.605139000  |
| N | 1.041922000  | -2.427079000 | -0.798255000 |
| C | 1.870266000  | -3.081018000 | 0.208221000  |
| H | 1.889269000  | -4.161127000 | 0.021989000  |
| H | 2.891189000  | -2.694948000 | 0.160014000  |
| H | 1.456946000  | -2.904224000 | 1.201652000  |
| C | 1.491075000  | -2.546204000 | -2.180363000 |
| H | 1.508908000  | -3.601773000 | -2.473289000 |
| H | 0.814670000  | -1.998064000 | -2.833284000 |
| H | 2.496255000  | -2.126093000 | -2.262498000 |
| C | -2.021226000 | 1.693388000  | -1.693501000 |
| H | -1.820212000 | 1.457588000  | -2.738837000 |
| O | -1.270865000 | 3.260298000  | 0.120585000  |

### **EIII<sub>2a</sub>**

|    |              |              |              |
|----|--------------|--------------|--------------|
| Pd | 2.616224000  | -0.567223000 | -0.208972000 |
| O  | 1.446325000  | 1.088551000  | -0.837404000 |
| C  | 1.075473000  | 1.926355000  | 0.029340000  |
| C  | -4.432835000 | 3.108735000  | 2.121965000  |
| C  | -5.118791000 | 2.053870000  | 1.288933000  |
| O  | -6.035147000 | 1.368985000  | 1.697258000  |
| O  | -4.751447000 | 1.900580000  | -0.009058000 |
| H  | -4.929009000 | 3.152839000  | 3.091289000  |
| H  | -3.376240000 | 2.871002000  | 2.262218000  |
| H  | -4.499771000 | 4.087345000  | 1.635020000  |
| C  | -2.704539000 | -4.134972000 | -1.923046000 |
| C  | -2.321141000 | -3.117712000 | -0.880755000 |
| O  | -2.617235000 | -3.174296000 | 0.292424000  |
| O  | -1.572808000 | -2.138345000 | -1.460046000 |
| H  | -1.823413000 | -4.463744000 | -2.481483000 |
| H  | -3.188081000 | -4.987623000 | -1.446039000 |
| H  | -3.394104000 | -3.671320000 | -2.636742000 |
| C  | -2.371063000 | 1.378165000  | -0.368916000 |
| C  | -1.298532000 | 0.172695000  | 1.391276000  |
| C  | -2.581899000 | 0.038334000  | -1.065876000 |
| C  | -1.339057000 | -0.839202000 | -0.852803000 |
| C  | -0.889846000 | -0.816661000 | 0.587823000  |
| O  | -2.126949000 | 1.205290000  | 1.036974000  |
| C  | -3.501288000 | 2.386869000  | -0.521930000 |
| H  | -0.992757000 | 0.251755000  | 2.427039000  |
| H  | -0.536146000 | -0.435261000 | -1.478065000 |
| H  | -1.487729000 | 1.838671000  | -0.824040000 |
| H  | -3.666105000 | 2.570742000  | -1.585901000 |
| H  | -3.211619000 | 3.330109000  | -0.053332000 |
| I  | 5.062194000  | 0.890943000  | -0.422931000 |
| C  | 1.286405000  | -2.673686000 | 2.906983000  |
| C  | 0.087104000  | -1.866804000 | 1.062892000  |
| C  | 2.647291000  | -2.742405000 | 2.217871000  |
| C  | 2.505593000  | -2.682855000 | 0.679589000  |
| C  | 1.270774000  | -2.068562000 | 0.127232000  |
| O  | 0.506378000  | -1.589653000 | 2.392333000  |
| H  | -0.450231000 | -2.831889000 | 1.069796000  |
| H  | 2.772075000  | -3.612427000 | 0.166357000  |
| H  | 0.734218000  | -3.617702000 | 2.778448000  |
| H  | 3.163971000  | -3.662659000 | 2.507221000  |
| H  | 3.445198000  | -2.052390000 | 0.284273000  |
| H  | 3.258145000  | -1.904377000 | 2.564200000  |
| H  | 1.405024000  | -2.492399000 | 3.978381000  |

|   |              |              |              |
|---|--------------|--------------|--------------|
| H | 0.963631000  | -2.449128000 | -0.849211000 |
| H | -2.746601000 | 0.196704000  | -2.133097000 |
| O | -3.711905000 | -0.631350000 | -0.494719000 |
| C | -4.828075000 | -0.780608000 | -1.252561000 |
| C | -5.926029000 | -1.382978000 | -0.425488000 |
| H | -6.761754000 | -1.670613000 | -1.064025000 |
| H | -5.549866000 | -2.247932000 | 0.127492000  |
| H | -6.249143000 | -0.628826000 | 0.301529000  |
| O | -4.904197000 | -0.454738000 | -2.419399000 |
| H | 1.146274000  | 1.711238000  | 1.098607000  |
| N | 0.564848000  | 3.115722000  | -0.271696000 |
| C | 0.434266000  | 3.582805000  | -1.649860000 |
| H | -0.619171000 | 3.782653000  | -1.872729000 |
| H | 1.002433000  | 4.509805000  | -1.773562000 |
| H | 0.814724000  | 2.825187000  | -2.333174000 |
| C | 0.080980000  | 4.013739000  | 0.773242000  |
| H | 0.223390000  | 3.558100000  | 1.754113000  |
| H | 0.628006000  | 4.960370000  | 0.731075000  |
| H | -0.984737000 | 4.213048000  | 0.621911000  |

## EIV<sub>2a</sub>

|    |              |              |              |
|----|--------------|--------------|--------------|
| Pd | -2.556800000 | -0.028368000 | 0.508305000  |
| O  | -1.289967000 | -1.652741000 | -0.037353000 |
| C  | -0.721198000 | -2.348471000 | 0.847014000  |
| C  | 4.563231000  | -3.045120000 | 1.479086000  |
| C  | 5.127604000  | -1.975468000 | 0.575451000  |
| O  | 6.140248000  | -1.353339000 | 0.827622000  |
| O  | 4.520091000  | -1.730261000 | -0.612668000 |
| H  | 5.232654000  | -3.157730000 | 2.331632000  |
| H  | 3.565568000  | -2.772922000 | 1.829914000  |
| H  | 4.490041000  | -3.999733000 | 0.948026000  |
| C  | 1.962036000  | 4.683013000  | -1.167662000 |
| C  | 1.931936000  | 3.380778000  | -0.406465000 |
| O  | 2.397375000  | 3.215993000  | 0.699913000  |
| O  | 1.294071000  | 2.444395000  | -1.147233000 |
| H  | 2.587098000  | 5.402787000  | -0.638362000 |
| H  | 2.341510000  | 4.529777000  | -2.181874000 |
| H  | 0.943138000  | 5.075550000  | -1.251060000 |
| C  | 2.126918000  | -1.151931000 | -0.487813000 |
| C  | 1.341042000  | -0.085712000 | 1.479077000  |
| C  | 2.246309000  | 0.230463000  | -1.113368000 |
| C  | 1.056228000  | 1.100303000  | -0.665608000 |
| C  | 0.774770000  | 0.925780000  | 0.809504000  |
| O  | 2.148244000  | -1.056668000 | 0.946922000  |
| C  | 3.182309000  | -2.166445000 | -0.901824000 |
| H  | 1.180494000  | -0.252114000 | 2.540327000  |
| H  | 0.176290000  | 0.791433000  | -1.239878000 |
| H  | 1.157977000  | -1.558899000 | -0.802983000 |
| H  | 3.138485000  | -2.293925000 | -1.985730000 |
| H  | 2.964940000  | -3.129647000 | -0.434850000 |
| I  | -4.608873000 | -0.772811000 | -1.331512000 |
| C  | -2.813145000 | 1.716050000  | 1.999164000  |
| C  | -0.260466000 | 1.778583000  | 1.531280000  |
| C  | -2.867135000 | 3.194772000  | 1.545388000  |
| C  | -1.467324000 | 3.789434000  | 1.452275000  |
| H  | 0.193759000  | 2.136456000  | 2.473789000  |
| H  | -1.053105000 | 3.984784000  | 2.453969000  |
| H  | -3.350684000 | 1.519958000  | 2.930583000  |
| H  | -3.475641000 | 3.771183000  | 2.249011000  |
| H  | -1.479086000 | 4.732968000  | 0.900182000  |

|   |              |              |              |
|---|--------------|--------------|--------------|
| H | -3.346841000 | 3.265130000  | 0.565530000  |
| H | -3.586955000 | 1.162640000  | 1.256289000  |
| H | 2.257987000  | 0.155287000  | -2.201821000 |
| O | 3.456386000  | 0.848538000  | -0.658509000 |
| C | 4.420630000  | 1.129975000  | -1.568011000 |
| C | 5.644381000  | 1.646351000  | -0.867273000 |
| H | 6.346975000  | 2.057933000  | -1.592601000 |
| H | 5.366977000  | 2.402966000  | -0.128589000 |
| H | 6.104256000  | 0.805805000  | -0.334420000 |
| O | 4.300261000  | 0.961408000  | -2.764467000 |
| H | -0.696951000 | -2.031284000 | 1.892643000  |
| N | -0.104686000 | -3.497104000 | 0.593275000  |
| C | -0.084421000 | -4.093073000 | -0.740455000 |
| H | 0.943198000  | -4.136922000 | -1.114078000 |
| H | -0.482617000 | -5.110758000 | -0.685792000 |
| H | -0.694476000 | -3.497836000 | -1.417870000 |
| C | 0.633889000  | -4.200523000 | 1.637921000  |
| H | 0.544088000  | -3.666351000 | 2.585387000  |
| H | 0.238312000  | -5.213878000 | 1.755612000  |
| H | 1.691047000  | -4.260752000 | 1.362611000  |
| C | -1.514176000 | 0.999451000  | 1.939365000  |
| H | -1.316219000 | 0.301266000  | 2.755568000  |
| O | -0.600064000 | 2.907826000  | 0.739741000  |

### TS3I<sub>2a</sub>

|    |              |              |              |
|----|--------------|--------------|--------------|
| Pd | 2.910825000  | 0.186450000  | -0.275949000 |
| O  | 1.444238000  | -1.354627000 | -0.719783000 |
| C  | 0.343843000  | -1.179434000 | -1.306844000 |
| C  | -6.423362000 | -2.359989000 | 1.555846000  |
| C  | -5.320098000 | -2.354327000 | 0.530201000  |
| O  | -5.411349000 | -2.857144000 | -0.571736000 |
| O  | -4.148516000 | -1.748460000 | 0.846519000  |
| H  | -7.220864000 | -3.014233000 | 1.204466000  |
| H  | -6.066713000 | -2.700884000 | 2.532084000  |
| H  | -6.822688000 | -1.347351000 | 1.676983000  |
| C  | -2.409365000 | 3.669801000  | -2.423795000 |
| C  | -1.805214000 | 2.649375000  | -1.496458000 |
| O  | -1.163078000 | 1.682565000  | -1.854833000 |
| O  | -2.074217000 | 2.982059000  | -0.212038000 |
| H  | -3.501088000 | 3.602412000  | -2.364553000 |
| H  | -2.124512000 | 4.681160000  | -2.120150000 |
| H  | -2.085427000 | 3.477627000  | -3.446654000 |
| C  | -2.840909000 | -0.030549000 | 1.921864000  |
| C  | -0.560972000 | 0.020515000  | 1.299527000  |
| C  | -3.127700000 | 1.125090000  | 0.962789000  |
| C  | -1.898126000 | 2.055598000  | 0.894919000  |
| C  | -0.587577000 | 1.315183000  | 0.958119000  |
| O  | -1.650244000 | -0.752428000 | 1.569653000  |
| C  | -3.963886000 | -1.039023000 | 2.085395000  |
| H  | 0.361635000  | -0.536893000 | 1.407762000  |
| H  | -1.954595000 | 2.730462000  | 1.755705000  |
| H  | -2.685899000 | 0.426082000  | 2.911210000  |
| H  | -4.866860000 | -0.500286000 | 2.378935000  |
| H  | -3.698342000 | -1.753570000 | 2.870528000  |
| I  | 4.917644000  | -1.701152000 | -0.050587000 |
| C  | 2.688049000  | 2.609166000  | 2.192696000  |
| C  | 0.688989000  | 2.121928000  | 0.861882000  |
| C  | 3.170510000  | 3.282041000  | 0.905424000  |
| C  | 2.841236000  | 2.464091000  | -0.321371000 |
| C  | 1.563343000  | 1.877788000  | -0.362464000 |

|   |              |              |              |
|---|--------------|--------------|--------------|
| O | 1.430369000  | 1.915413000  | 2.074089000  |
| H | 0.391214000  | 3.185165000  | 0.794939000  |
| H | 4.014074000  | 1.201273000  | 0.055536000  |
| H | 3.423831000  | 1.857097000  | 2.501494000  |
| H | 4.239481000  | 3.496030000  | 0.985772000  |
| H | 3.340146000  | 2.733065000  | -1.249571000 |
| H | 2.657221000  | 4.244127000  | 0.766500000  |
| H | 1.049975000  | 1.752905000  | -1.309921000 |
| H | 2.605779000  | 3.355170000  | 2.993887000  |
| H | -3.988507000 | 1.682954000  | 1.336368000  |
| O | -3.415069000 | 0.668259000  | -0.367181000 |
| C | -4.714972000 | 0.594751000  | -0.745462000 |
| C | -4.835109000 | 0.135124000  | -2.170035000 |
| H | -4.003447000 | 0.497424000  | -2.776805000 |
| H | -4.823110000 | -0.960493000 | -2.172300000 |
| H | -5.788252000 | 0.471776000  | -2.580497000 |
| O | -5.647453000 | 0.840538000  | -0.005369000 |
| H | 0.157410000  | -0.302594000 | -1.930933000 |
| N | -0.678379000 | -2.022078000 | -1.221501000 |
| C | -0.641984000 | -3.211244000 | -0.378148000 |
| H | -1.403382000 | -3.117628000 | 0.401524000  |
| H | -0.853071000 | -4.098656000 | -0.983455000 |
| H | 0.341795000  | -3.308177000 | 0.078461000  |
| C | -1.938115000 | -1.745703000 | -1.906223000 |
| H | -2.122625000 | -2.504032000 | -2.675128000 |
| H | -2.748252000 | -1.764446000 | -1.176083000 |
| H | -1.898304000 | -0.757076000 | -2.362534000 |

### TS3II<sub>2a</sub>

|    |              |              |              |
|----|--------------|--------------|--------------|
| Pd | -2.622788000 | -0.045214000 | -0.687695000 |
| C  | -0.121902000 | -1.757759000 | -0.511493000 |
| O  | -0.945264000 | -1.274332000 | -1.328336000 |
| C  | 6.825810000  | -0.653494000 | -0.379180000 |
| C  | 5.489363000  | -1.340088000 | -0.265434000 |
| O  | 5.321574000  | -2.399129000 | 0.308181000  |
| O  | 4.404646000  | -0.755279000 | -0.827488000 |
| H  | 7.591860000  | -1.325607000 | 0.006952000  |
| H  | 7.055745000  | -0.386522000 | -1.414855000 |
| H  | 6.824672000  | 0.264630000  | 0.217137000  |
| C  | -0.135637000 | 1.942619000  | 3.424101000  |
| C  | 0.128052000  | 1.590860000  | 1.981617000  |
| O  | -0.356052000 | 0.636209000  | 1.406227000  |
| O  | 0.948667000  | 2.505699000  | 1.433511000  |
| H  | -0.720088000 | 1.151745000  | 3.894688000  |
| H  | 0.807108000  | 2.082478000  | 3.960763000  |
| H  | -0.688808000 | 2.886336000  | 3.473526000  |
| C  | 3.144050000  | 1.251742000  | -1.333358000 |
| C  | 0.870287000  | 0.990272000  | -1.879716000 |
| C  | 2.743348000  | 1.639146000  | 0.084502000  |
| C  | 1.408744000  | 2.417583000  | 0.059142000  |
| C  | 0.447980000  | 1.890597000  | -0.982493000 |
| O  | 2.129299000  | 0.462130000  | -1.961749000 |
| C  | 4.472657000  | 0.530566000  | -1.470706000 |
| H  | 0.234460000  | 0.586287000  | -2.656902000 |
| H  | 1.642436000  | 3.462454000  | -0.168983000 |
| H  | 3.249703000  | 2.195198000  | -1.892469000 |
| H  | 5.245431000  | 1.163500000  | -1.031629000 |
| H  | 4.695328000  | 0.378611000  | -2.531567000 |
| I  | -3.724768000 | -2.108904000 | 0.793816000  |
| C  | -3.357469000 | 2.003313000  | -1.401799000 |

|   |              |              |              |
|---|--------------|--------------|--------------|
| C | -0.895732000 | 2.597977000  | -1.181751000 |
| C | -3.634375000 | 3.077710000  | -0.373099000 |
| C | -2.486723000 | 3.124487000  | 0.624114000  |
| H | -0.730832000 | 3.355225000  | -1.968306000 |
| H | -2.454547000 | 2.181664000  | 1.188756000  |
| H | -3.905261000 | 0.742205000  | -0.373813000 |
| H | -4.586147000 | 2.912171000  | 0.140211000  |
| H | -2.610877000 | 3.947944000  | 1.332418000  |
| H | -3.702681000 | 4.036130000  | -0.905001000 |
| H | -4.134864000 | 1.799692000  | -2.134723000 |
| H | 3.521613000  | 2.267268000  | 0.521182000  |
| O | 2.563034000  | 0.479687000  | 0.916418000  |
| C | 3.537264000  | 0.198211000  | 1.810654000  |
| C | 3.165193000  | -0.964639000 | 2.685512000  |
| H | 3.580512000  | -0.807372000 | 3.683032000  |
| H | 2.085127000  | -1.103734000 | 2.737099000  |
| H | 3.624398000  | -1.864192000 | 2.263074000  |
| O | 4.593448000  | 0.799675000  | 1.874261000  |
| H | -0.265293000 | -1.658650000 | 0.566814000  |
| N | 0.970712000  | -2.422652000 | -0.874585000 |
| C | 1.863916000  | -3.010901000 | 0.115820000  |
| H | 1.913617000  | -4.095948000 | -0.031381000 |
| H | 2.867368000  | -2.591564000 | 0.014283000  |
| H | 1.486388000  | -2.810896000 | 1.118968000  |
| C | 1.347224000  | -2.594530000 | -2.271777000 |
| H | 1.380336000  | -3.661331000 | -2.518811000 |
| H | 0.618400000  | -2.096591000 | -2.909048000 |
| H | 2.333445000  | -2.152422000 | -2.434080000 |
| C | -2.017796000 | 1.735044000  | -1.748876000 |
| H | -1.819672000 | 1.342297000  | -2.743497000 |
| O | -1.239160000 | 3.369971000  | -0.025359000 |

### TS3III<sub>2a</sub>

|    |              |              |              |
|----|--------------|--------------|--------------|
| Pd | -2.798372000 | 0.672427000  | -0.250932000 |
| O  | -1.576752000 | -0.920582000 | -1.110252000 |
| C  | -1.180582000 | -1.862557000 | -0.380579000 |
| C  | 4.216237000  | -3.262296000 | 2.175732000  |
| C  | 5.014147000  | -2.203450000 | 1.455636000  |
| O  | 5.912283000  | -1.571930000 | 1.975551000  |
| O  | 4.773224000  | -1.981201000 | 0.138387000  |
| H  | 4.596265000  | -3.342473000 | 3.193917000  |
| H  | 3.155299000  | -3.005562000 | 2.199637000  |
| H  | 4.320128000  | -4.229606000 | 1.672596000  |
| C  | 2.956780000  | 4.214006000  | -1.602733000 |
| C  | 2.466708000  | 3.124249000  | -0.685121000 |
| O  | 2.629518000  | 3.099006000  | 0.515149000  |
| O  | 1.808163000  | 2.181271000  | -1.412691000 |
| H  | 2.176879000  | 4.512477000  | -2.308086000 |
| H  | 3.285528000  | 5.071441000  | -1.015018000 |
| H  | 3.800735000  | 3.827628000  | -2.185209000 |
| C  | 2.444346000  | -1.399421000 | -0.433609000 |
| C  | 1.170513000  | -0.280174000 | 1.245172000  |
| C  | 2.753248000  | -0.026254000 | -1.020402000 |
| C  | 1.499229000  | 0.852813000  | -0.913382000 |
| C  | 0.870214000  | 0.757927000  | 0.454932000  |
| O  | 2.036294000  | -1.297713000 | 0.940962000  |
| C  | 3.571995000  | -2.419150000 | -0.516150000 |
| H  | 0.733040000  | -0.416402000 | 2.226058000  |
| H  | 0.781662000  | 0.490546000  | -1.657479000 |
| H  | 1.612670000  | -1.813980000 | -1.015391000 |

|   |              |              |              |
|---|--------------|--------------|--------------|
| H | 3.839178000  | -2.556649000 | -1.566376000 |
| H | 3.225111000  | -3.378759000 | -0.125477000 |
| I | -4.982898000 | -0.994392000 | -0.024745000 |
| C | -1.779332000 | 2.266745000  | 2.607187000  |
| C | -0.156679000 | 1.790905000  | 0.857099000  |
| C | -2.291394000 | 3.330643000  | 1.627810000  |
| C | -2.297305000 | 2.852601000  | 0.193730000  |
| C | -1.188320000 | 2.093784000  | -0.223756000 |
| O | -0.798379000 | 1.367030000  | 2.058569000  |
| H | 0.377302000  | 2.737269000  | 1.047955000  |
| H | -2.823164000 | 3.470214000  | -0.530480000 |
| H | -1.362231000 | 2.754332000  | 3.498108000  |
| H | -1.623394000 | 4.203158000  | 1.638335000  |
| H | -3.687258000 | 1.804934000  | 0.295463000  |
| H | -3.276750000 | 3.676702000  | 1.950171000  |
| H | -2.613381000 | 1.631305000  | 2.923396000  |
| H | -0.849536000 | 2.162712000  | -1.254319000 |
| H | 3.048269000  | -0.125430000 | -2.066392000 |
| O | 3.808676000  | 0.591723000  | -0.274930000 |
| C | 4.998737000  | 0.802070000  | -0.892582000 |
| C | 5.992034000  | 1.348235000  | 0.090957000  |
| H | 6.891448000  | 1.678115000  | -0.429736000 |
| H | 5.549086000  | 2.175218000  | 0.652730000  |
| H | 6.238491000  | 0.549066000  | 0.799352000  |
| O | 5.205892000  | 0.566635000  | -2.065303000 |
| H | -1.309553000 | -1.840462000 | 0.705581000  |
| N | -0.576444000 | -2.956370000 | -0.842788000 |
| C | -0.377098000 | -3.185725000 | -2.270798000 |
| H | -0.633294000 | -2.284492000 | -2.825959000 |
| H | 0.669554000  | -3.445569000 | -2.457070000 |
| H | -1.009828000 | -4.014659000 | -2.605266000 |
| C | -0.122809000 | -4.006852000 | 0.063190000  |
| H | -0.318262000 | -3.718081000 | 1.097038000  |
| H | -0.647730000 | -4.942277000 | -0.155904000 |
| H | 0.952170000  | -4.167502000 | -0.065873000 |

### TS3IV<sub>2a</sub>

|    |              |              |              |
|----|--------------|--------------|--------------|
| Pd | 2.584489000  | -0.082335000 | -0.486583000 |
| O  | 1.275927000  | -1.827413000 | -0.253642000 |
| C  | 0.655804000  | -2.413692000 | -1.174308000 |
| C  | -4.805952000 | -2.751772000 | -1.326726000 |
| C  | -5.173517000 | -1.680390000 | -0.328452000 |
| O  | -6.153954000 | -0.971759000 | -0.440236000 |
| O  | -4.417868000 | -1.535160000 | 0.788806000  |
| H  | -5.571526000 | -2.770434000 | -2.102177000 |
| H  | -3.832681000 | -2.547957000 | -1.777641000 |
| H  | -4.757637000 | -3.732165000 | -0.841309000 |
| C  | -1.475698000 | 4.675021000  | 1.125376000  |
| C  | -1.604217000 | 3.384389000  | 0.354852000  |
| O  | -2.228974000 | 3.250835000  | -0.673681000 |
| O  | -0.906370000 | 2.414036000  | 0.994811000  |
| H  | -2.127846000 | 5.431449000  | 0.687910000  |
| H  | -1.732919000 | 4.520757000  | 2.177233000  |
| H  | -0.437016000 | 5.019210000  | 1.085165000  |
| C  | -2.017222000 | -1.120969000 | 0.389824000  |
| C  | -1.378553000 | -0.060612000 | -1.636007000 |
| C  | -1.976485000 | 0.249533000  | 1.049487000  |
| C  | -0.797532000 | 1.065147000  | 0.480838000  |
| C  | -0.683895000 | 0.902583000  | -1.017007000 |
| O  | -2.182250000 | -0.991124000 | -1.034429000 |

|   |              |              |              |
|---|--------------|--------------|--------------|
| C | -3.089878000 | -2.072373000 | 0.899322000  |
| H | -1.337168000 | -0.218246000 | -2.710221000 |
| H | 0.123631000  | 0.704636000  | 0.952378000  |
| H | -1.051468000 | -1.600343000 | 0.593205000  |
| H | -2.925393000 | -2.241593000 | 1.965861000  |
| H | -3.001442000 | -3.030817000 | 0.383683000  |
| I | 4.058323000  | -0.835990000 | 1.732980000  |
| C | 2.876202000  | 1.484245000  | -2.129964000 |
| C | 0.346349000  | 1.673122000  | -1.829485000 |
| C | 3.008394000  | 2.990844000  | -1.879092000 |
| C | 1.629349000  | 3.645809000  | -1.923469000 |
| H | -0.109486000 | 1.912722000  | -2.807902000 |
| H | 1.280544000  | 3.740930000  | -2.963707000 |
| H | 3.655652000  | 1.037583000  | -2.743772000 |
| H | 3.648467000  | 3.411495000  | -2.662198000 |
| H | 1.652492000  | 4.644446000  | -1.480000000 |
| H | 3.491533000  | 3.202763000  | -0.922481000 |
| H | 3.598400000  | 1.056386000  | -0.689510000 |
| H | -1.862612000 | 0.144829000  | 2.129710000  |
| O | -3.194133000 | 0.945182000  | 0.757791000  |
| C | -4.003534000 | 1.292912000  | 1.786314000  |
| C | -5.255529000 | 1.930457000  | 1.255584000  |
| H | -5.820136000 | 2.382681000  | 2.071528000  |
| H | -5.004445000 | 2.679709000  | 0.500018000  |
| H | -5.852842000 | 1.148906000  | 0.771727000  |
| O | -3.744482000 | 1.094721000  | 2.956137000  |
| H | 0.616317000  | -2.008784000 | -2.190185000 |
| N | -0.010981000 | -3.553231000 | -1.004617000 |
| C | -0.027695000 | -4.256483000 | 0.274837000  |
| H | -1.042591000 | -4.267541000 | 0.683863000  |
| H | 0.301684000  | -5.289066000 | 0.123716000  |
| H | 0.641473000  | -3.758517000 | 0.974734000  |
| C | -0.817273000 | -4.122201000 | -2.078846000 |
| H | -0.710735000 | -3.521562000 | -2.983723000 |
| H | -0.494156000 | -5.146995000 | -2.286240000 |
| H | -1.871496000 | -4.135567000 | -1.783279000 |
| C | 1.605985000  | 0.862290000  | -2.153612000 |
| H | 1.451457000  | 0.027985000  | -2.835945000 |
| O | 0.688424000  | 2.883611000  | -1.169310000 |

## Fl<sub>2a</sub>

|    |              |              |              |
|----|--------------|--------------|--------------|
| Pd | -2.804084000 | 0.198488000  | 0.241563000  |
| O  | -1.939747000 | -0.445265000 | 2.280769000  |
| C  | -0.694325000 | -0.445804000 | 2.449709000  |
| C  | 5.679060000  | -3.146518000 | -1.533185000 |
| C  | 4.726047000  | -2.789520000 | -0.422410000 |
| O  | 4.867923000  | -3.136788000 | 0.732753000  |
| O  | 3.646673000  | -2.023717000 | -0.719955000 |
| H  | 6.386256000  | -3.886815000 | -1.159878000 |
| H  | 5.153855000  | -3.540310000 | -2.408041000 |
| H  | 6.231799000  | -2.254508000 | -1.847831000 |
| C  | 2.989113000  | 3.909765000  | 1.772947000  |
| C  | 2.096739000  | 2.924711000  | 1.066087000  |
| O  | 1.326762000  | 2.166047000  | 1.618136000  |
| O  | 2.271867000  | 3.028695000  | -0.276649000 |
| H  | 2.904448000  | 4.902503000  | 1.322363000  |
| H  | 2.729948000  | 3.950733000  | 2.831018000  |
| H  | 4.029347000  | 3.583693000  | 1.662625000  |
| C  | 2.452348000  | -0.336715000 | -1.961147000 |
| C  | 0.284767000  | 0.086368000  | -1.095649000 |

|   |              |              |              |
|---|--------------|--------------|--------------|
| C | 2.959965000  | 0.906582000  | -1.229350000 |
| C | 1.858100000  | 1.985222000  | -1.200160000 |
| C | 0.482737000  | 1.406163000  | -0.981084000 |
| O | 1.232042000  | -0.843917000 | -1.395591000 |
| C | 3.435204000  | -1.491770000 | -2.041142000 |
| H | -0.691168000 | -0.373330000 | -0.963587000 |
| H | 1.880572000  | 2.509010000  | -2.161186000 |
| H | 2.247892000  | -0.025260000 | -2.996204000 |
| H | 4.364566000  | -1.119035000 | -2.476966000 |
| H | 3.022799000  | -2.275726000 | -2.683799000 |
| I | -4.126521000 | -2.118913000 | -0.293740000 |
| C | -2.424557000 | 3.541036000  | -1.790278000 |
| C | -0.660683000 | 2.368200000  | -0.749412000 |
| C | -3.490864000 | 3.190222000  | -0.736902000 |
| C | -2.885940000 | 2.431273000  | 0.430841000  |
| C | -1.553741000 | 2.048446000  | 0.430541000  |
| O | -1.435353000 | 2.515662000  | -1.946735000 |
| H | -0.211014000 | 3.348629000  | -0.512980000 |
| H | -3.226973000 | 0.523375000  | -1.158685000 |
| H | -2.878217000 | 3.681600000  | -2.774357000 |
| H | -4.319611000 | 2.630100000  | -1.178498000 |
| H | -3.426440000 | 2.471981000  | 1.375324000  |
| H | -3.921617000 | 4.120393000  | -0.345590000 |
| H | -1.035745000 | 1.865165000  | 1.362952000  |
| H | -1.923878000 | 4.481267000  | -1.510940000 |
| H | 3.839272000  | 1.287537000  | -1.752140000 |
| O | 3.314596000  | 0.614035000  | 0.130389000  |
| C | 4.622367000  | 0.395800000  | 0.416917000  |
| C | 4.799827000  | 0.075212000  | 1.872587000  |
| H | 5.834897000  | 0.257422000  | 2.164172000  |
| H | 4.115761000  | 0.655875000  | 2.494209000  |
| H | 4.578526000  | -0.989592000 | 2.007063000  |
| O | 5.508522000  | 0.426152000  | -0.413901000 |
| H | -0.210933000 | 0.338876000  | 3.047444000  |
| N | 0.159735000  | -1.342807000 | 1.962996000  |
| C | -0.274329000 | -2.509024000 | 1.203137000  |
| H | 0.013165000  | -3.419337000 | 1.741130000  |
| H | -1.354144000 | -2.487728000 | 1.074685000  |
| H | 0.215289000  | -2.510939000 | 0.225513000  |
| C | 1.597879000  | -1.217473000 | 2.189442000  |
| H | 1.945080000  | -2.013436000 | 2.857782000  |
| H | 2.118537000  | -1.298022000 | 1.234000000  |
| H | 1.818519000  | -0.242866000 | 2.623101000  |

### **FIII<sub>2a</sub>**

|    |              |              |              |
|----|--------------|--------------|--------------|
| Pd | 2.648633000  | -0.606049000 | 0.095479000  |
| O  | 2.030397000  | 1.527321000  | 0.131738000  |
| C  | 1.846018000  | 2.405980000  | 1.000976000  |
| C  | -4.667706000 | 3.317154000  | -0.473485000 |
| C  | -5.128730000 | 1.904148000  | -0.734501000 |
| O  | -6.135240000 | 1.428923000  | -0.247530000 |
| O  | -4.427565000 | 1.133255000  | -1.604098000 |
| H  | -5.403115000 | 3.801756000  | 0.168284000  |
| H  | -3.692991000 | 3.321863000  | 0.018833000  |
| H  | -4.577788000 | 3.876505000  | -1.410348000 |
| C  | -2.095123000 | -4.459929000 | 1.013371000  |
| C  | -1.831532000 | -2.994637000 | 1.242713000  |
| O  | -2.241197000 | -2.350704000 | 2.183614000  |
| O  | -1.046521000 | -2.512680000 | 0.241025000  |
| H  | -1.156938000 | -4.997637000 | 0.848287000  |

|   |              |              |              |
|---|--------------|--------------|--------------|
| H | -2.621529000 | -4.878529000 | 1.871248000  |
| H | -2.705359000 | -4.576360000 | 0.111442000  |
| C | -2.026311000 | 0.862209000  | -1.097378000 |
| C | -1.294619000 | 1.028700000  | 1.150990000  |
| C | -2.079066000 | -0.651375000 | -0.915875000 |
| C | -0.896715000 | -1.093906000 | -0.041398000 |
| C | -0.694383000 | -0.167540000 | 1.132752000  |
| O | -2.115220000 | 1.526033000  | 0.173943000  |
| C | -3.087679000 | 1.450396000  | -2.016204000 |
| H | -1.161128000 | 1.739959000  | 1.956259000  |
| H | 0.005433000  | -1.080793000 | -0.663095000 |
| H | -1.053266000 | 1.104258000  | -1.549025000 |
| H | -2.971060000 | 1.007795000  | -3.008142000 |
| H | -2.936344000 | 2.528483000  | -2.103750000 |
| C | 1.702128000  | 0.379384000  | 3.892573000  |
| C | 0.269827000  | -0.553681000 | 2.237097000  |
| C | 3.009145000  | -0.092010000 | 3.249329000  |
| C | 2.718379000  | -1.205227000 | 2.264439000  |
| C | 1.435681000  | -1.415917000 | 1.778769000  |
| O | 0.703813000  | 0.629549000  | 2.900879000  |
| H | -0.274514000 | -1.186190000 | 2.961258000  |
| H | 3.438198000  | -2.017847000 | 2.212500000  |
| H | 1.339898000  | -0.376681000 | 4.605474000  |
| H | 3.686835000  | -0.469516000 | 4.023053000  |
| H | 3.038969000  | -2.046503000 | -0.140922000 |
| H | 3.527017000  | 0.744475000  | 2.768128000  |
| H | 1.838616000  | 1.320094000  | 4.431975000  |
| H | 1.162109000  | -2.392921000 | 1.390748000  |
| H | -2.032549000 | -1.150283000 | -1.885060000 |
| O | -3.293584000 | -1.011176000 | -0.243827000 |
| C | -4.194247000 | -1.782948000 | -0.904320000 |
| C | -5.424444000 | -1.961595000 | -0.062833000 |
| H | -6.064824000 | -2.730611000 | -0.495868000 |
| H | -5.148925000 | -2.223824000 | 0.962262000  |
| H | -5.954584000 | -1.002658000 | -0.037409000 |
| O | -4.015508000 | -2.236798000 | -2.015512000 |
| H | 2.349424000  | 2.374155000  | 1.970615000  |
| N | 1.056168000  | 3.466202000  | 0.825222000  |
| C | 0.319945000  | 3.679886000  | -0.415590000 |
| H | 0.565052000  | 2.888096000  | -1.121495000 |
| H | -0.755470000 | 3.668595000  | -0.216892000 |
| H | 0.595800000  | 4.649606000  | -0.842649000 |
| C | 0.868218000  | 4.454771000  | 1.879102000  |
| H | 1.446986000  | 4.178478000  | 2.762551000  |
| H | 1.192055000  | 5.442582000  | 1.534249000  |
| H | -0.190983000 | 4.509643000  | 2.152765000  |
| I | 3.530509000  | -0.303851000 | -2.465828000 |

## GI<sub>2a</sub>

|    |              |              |              |
|----|--------------|--------------|--------------|
| Pd | -3.083324000 | -0.205199000 | 0.416195000  |
| O  | -1.992477000 | -0.597164000 | 2.417787000  |
| C  | -0.746417000 | -0.671169000 | 2.533383000  |
| C  | 5.666926000  | -2.723497000 | -1.461678000 |
| C  | 4.685098000  | -2.431633000 | -0.356782000 |
| O  | 4.874722000  | -2.704236000 | 0.811606000  |
| O  | 3.515708000  | -1.825252000 | -0.676788000 |
| H  | 6.468557000  | -3.341444000 | -1.057889000 |
| H  | 5.190446000  | -3.235979000 | -2.302582000 |
| H  | 6.094493000  | -1.787524000 | -1.837174000 |
| C  | 2.292527000  | 4.249695000  | 1.463958000  |

|   |              |              |              |
|---|--------------|--------------|--------------|
| C | 1.499551000  | 3.114632000  | 0.871453000  |
| O | 0.814724000  | 2.341305000  | 1.506979000  |
| O | 1.658017000  | 3.104010000  | -0.477345000 |
| H | 3.357638000  | 3.996450000  | 1.413777000  |
| H | 2.143652000  | 5.169517000  | 0.892228000  |
| H | 2.004989000  | 4.399266000  | 2.504889000  |
| C | 2.130637000  | -0.326537000 | -1.957637000 |
| C | -0.047285000 | -0.077967000 | -1.048874000 |
| C | 2.519189000  | 0.984345000  | -1.274911000 |
| C | 1.323751000  | 1.954634000  | -1.300092000 |
| C | 0.020507000  | 1.258887000  | -0.994474000 |
| O | 0.974298000  | -0.926359000 | -1.350615000 |
| C | 3.220439000  | -1.383303000 | -2.013864000 |
| H | -0.968477000 | -0.620268000 | -0.859175000 |
| H | 1.275296000  | 2.396932000  | -2.300516000 |
| H | 1.882915000  | -0.073523000 | -2.999075000 |
| H | 4.097311000  | -0.947300000 | -2.497447000 |
| H | 2.869119000  | -2.235144000 | -2.604482000 |
| C | -3.103955000 | 3.051539000  | -1.801651000 |
| C | -1.208459000 | 2.108308000  | -0.762909000 |
| C | -4.109763000 | 2.626317000  | -0.718450000 |
| C | -3.403814000 | 1.996102000  | 0.471439000  |
| C | -2.039517000 | 1.750652000  | 0.453188000  |
| O | -2.016870000 | 2.130639000  | -1.946611000 |
| H | -0.855422000 | 3.137384000  | -0.575008000 |
| H | -3.648800000 | -0.074579000 | -0.964131000 |
| H | -3.585357000 | 3.116167000  | -2.780712000 |
| H | -4.870037000 | 1.953207000  | -1.124213000 |
| H | -3.921338000 | 2.047435000  | 1.428509000  |
| H | -4.643012000 | 3.517638000  | -0.364577000 |
| H | -1.484119000 | 1.669182000  | 1.379568000  |
| H | -2.700043000 | 4.046955000  | -1.557295000 |
| H | 3.368025000  | 1.424193000  | -1.801445000 |
| O | 2.873657000  | 0.777700000  | 0.101042000  |
| C | 4.191099000  | 0.744294000  | 0.420979000  |
| C | 4.375214000  | 0.519092000  | 1.893608000  |
| H | 3.585483000  | 1.003453000  | 2.470550000  |
| H | 4.330602000  | -0.561182000 | 2.071308000  |
| H | 5.357025000  | 0.883689000  | 2.198823000  |
| O | 5.086125000  | 0.851105000  | -0.393962000 |
| H | -0.203334000 | 0.060756000  | 3.146917000  |
| N | 0.046294000  | -1.588648000 | 1.979062000  |
| C | -0.463044000 | -2.699780000 | 1.181702000  |
| H | 0.024755000  | -2.697229000 | 0.202827000  |
| H | -0.224082000 | -3.643220000 | 1.686329000  |
| H | -1.541425000 | -2.616584000 | 1.056042000  |
| C | 1.495570000  | -1.544542000 | 2.159622000  |
| H | 1.839863000  | -2.479971000 | 2.613950000  |
| H | 1.985354000  | -1.416731000 | 1.192722000  |
| H | 1.764207000  | -0.712696000 | 2.811344000  |
| O | -3.683662000 | -2.177071000 | 0.380728000  |
| C | -3.955088000 | -2.792722000 | -0.738268000 |
| O | -3.942566000 | -2.296462000 | -1.868330000 |
| C | -4.290416000 | -4.265940000 | -0.532073000 |
| H | -3.410942000 | -4.788763000 | -0.140508000 |
| H | -5.089010000 | -4.375336000 | 0.208286000  |
| H | -4.595367000 | -4.729235000 | -1.472183000 |

### GIII<sub>2a</sub>

|    |              |             |             |
|----|--------------|-------------|-------------|
| Pd | -2.831774000 | 0.153119000 | 0.182814000 |
|----|--------------|-------------|-------------|

|   |              |              |              |
|---|--------------|--------------|--------------|
| O | -2.134802000 | -0.410508000 | -1.908663000 |
| C | -1.502214000 | -1.494598000 | -1.975171000 |
| C | 3.194394000  | -2.639440000 | 3.330782000  |
| C | 4.058686000  | -2.069077000 | 2.234129000  |
| O | 5.130557000  | -1.534209000 | 2.436537000  |
| O | 3.662045000  | -2.208080000 | 0.943653000  |
| H | 3.720692000  | -2.517617000 | 4.277250000  |
| H | 2.233981000  | -2.121191000 | 3.376143000  |
| H | 2.998559000  | -3.702615000 | 3.157132000  |
| C | 3.032315000  | 3.592608000  | -2.015548000 |
| C | 2.263653000  | 2.888495000  | -0.928072000 |
| O | 2.342544000  | 3.136179000  | 0.254722000  |
| O | 1.459314000  | 1.939683000  | -1.480668000 |
| H | 2.371044000  | 3.878667000  | -2.837976000 |
| H | 3.530552000  | 4.472069000  | -1.606954000 |
| H | 3.781779000  | 2.902626000  | -2.419524000 |
| C | 1.424089000  | -1.314208000 | 0.404957000  |
| C | 0.469817000  | 0.425815000  | 1.692298000  |
| C | 1.925818000  | -0.271667000 | -0.590007000 |
| C | 0.886158000  | 0.854205000  | -0.706050000 |
| C | 0.278374000  | 1.213039000  | 0.626114000  |
| O | 1.211574000  | -0.725692000 | 1.698715000  |
| C | 2.313647000  | -2.537944000 | 0.572462000  |
| H | 0.033236000  | 0.631232000  | 2.662115000  |
| H | 0.097037000  | 0.496479000  | -1.368722000 |
| H | 0.457429000  | -1.680360000 | 0.028878000  |
| H | 2.390838000  | -3.041884000 | -0.393837000 |
| H | 1.854633000  | -3.230460000 | 1.282085000  |
| C | -2.170523000 | 3.601341000  | 2.018669000  |
| C | -0.699421000 | 2.367617000  | 0.650383000  |
| C | -3.471185000 | 3.135002000  | 1.351613000  |
| C | -3.164857000 | 2.393185000  | 0.062203000  |
| C | -1.863084000 | 2.092397000  | -0.289306000 |
| O | -1.149932000 | 2.597969000  | 1.976181000  |
| H | -0.189104000 | 3.274045000  | 0.280877000  |
| H | -3.933306000 | 2.398135000  | -0.709112000 |
| H | -1.802841000 | 4.511811000  | 1.520155000  |
| H | -4.076624000 | 4.015493000  | 1.102858000  |
| H | -3.149360000 | 0.430560000  | 1.631213000  |
| H | -4.071193000 | 2.525829000  | 2.032325000  |
| H | -2.328314000 | 3.833657000  | 3.074562000  |
| H | -1.613032000 | 1.921383000  | -1.332313000 |
| H | 2.081528000  | -0.731525000 | -1.567102000 |
| O | 3.156688000  | 0.292407000  | -0.122061000 |
| C | 4.270983000  | 0.118220000  | -0.878513000 |
| C | 5.460219000  | 0.700131000  | -0.171598000 |
| H | 6.316897000  | 0.733813000  | -0.845201000 |
| H | 5.226240000  | 1.700971000  | 0.201454000  |
| H | 5.682516000  | 0.060576000  | 0.690409000  |
| O | 4.280279000  | -0.442204000 | -1.955139000 |
| H | -1.707333000 | -2.305733000 | -1.267456000 |
| N | -0.541599000 | -1.747576000 | -2.863175000 |
| C | -0.135540000 | -0.771995000 | -3.870237000 |
| H | -0.741785000 | 0.127204000  | -3.772670000 |
| H | 0.920990000  | -0.518871000 | -3.732952000 |
| H | -0.269123000 | -1.197226000 | -4.870049000 |
| C | 0.175984000  | -3.017866000 | -2.856044000 |
| H | -0.195457000 | -3.652219000 | -2.049385000 |
| H | 0.037972000  | -3.533703000 | -3.811871000 |
| H | 1.245368000  | -2.835941000 | -2.706513000 |
| O | -3.054045000 | -1.863622000 | 0.597883000  |
| C | -4.255457000 | -2.348977000 | 0.451109000  |

|   |              |              |              |
|---|--------------|--------------|--------------|
| C | -4.323667000 | -3.856582000 | 0.662938000  |
| H | -5.359125000 | -4.201424000 | 0.641892000  |
| H | -3.759961000 | -4.364231000 | -0.127726000 |
| H | -3.862547000 | -4.128912000 | 1.617373000  |
| O | -5.264036000 | -1.696833000 | 0.160435000  |

**TS4I<sub>2a</sub>**

|    |              |              |              |
|----|--------------|--------------|--------------|
| Pd | -3.046619000 | -0.259863000 | 0.566807000  |
| O  | -1.727560000 | -0.602806000 | 2.658227000  |
| C  | -0.483316000 | -0.662863000 | 2.650825000  |
| C  | 5.765825000  | -2.560691000 | -1.609749000 |
| C  | 4.809082000  | -2.359638000 | -0.463511000 |
| O  | 5.067609000  | -2.622147000 | 0.693840000  |
| O  | 3.581247000  | -1.850642000 | -0.730877000 |
| H  | 6.635887000  | -3.105185000 | -1.243567000 |
| H  | 5.301763000  | -3.112185000 | -2.432691000 |
| H  | 6.091222000  | -1.588438000 | -1.994867000 |
| C  | 2.294424000  | 4.221964000  | 1.416088000  |
| C  | 1.492084000  | 3.077851000  | 0.853246000  |
| O  | 0.819138000  | 2.313310000  | 1.511525000  |
| O  | 1.625839000  | 3.050053000  | -0.497804000 |
| H  | 3.359907000  | 3.980831000  | 1.329420000  |
| H  | 2.116213000  | 5.138567000  | 0.847219000  |
| H  | 2.040025000  | 4.372173000  | 2.465513000  |
| C  | 2.083673000  | -0.394776000 | -1.939074000 |
| C  | -0.053867000 | -0.156598000 | -0.948166000 |
| C  | 2.489148000  | 0.935388000  | -1.305514000 |
| C  | 1.279289000  | 1.887990000  | -1.297676000 |
| C  | -0.004727000 | 1.181799000  | -0.942087000 |
| O  | 0.976690000  | -0.997506000 | -1.249611000 |
| C  | 3.186659000  | -1.432745000 | -2.049293000 |
| H  | -0.962517000 | -0.705944000 | -0.716363000 |
| H  | 1.189844000  | 2.319064000  | -2.300379000 |
| H  | 1.767918000  | -0.164908000 | -2.967927000 |
| H  | 4.018157000  | -0.988369000 | -2.599972000 |
| H  | 2.814109000  | -2.301486000 | -2.601086000 |
| C  | -3.140515000 | 2.873927000  | -1.874275000 |
| C  | -1.244387000 | 2.025606000  | -0.750633000 |
| C  | -4.171695000 | 2.408581000  | -0.838012000 |
| C  | -3.480060000 | 1.902763000  | 0.420811000  |
| C  | -2.101987000 | 1.709717000  | 0.462019000  |
| O  | -2.019040000 | 1.990082000  | -1.958990000 |
| H  | -0.902577000 | 3.065108000  | -0.601014000 |
| H  | -3.747177000 | -0.459833000 | -0.842898000 |
| H  | -3.577447000 | 2.917668000  | -2.875754000 |
| H  | -4.830184000 | 1.645746000  | -1.264019000 |
| H  | -4.020789000 | 2.035392000  | 1.357451000  |
| H  | -4.813670000 | 3.258047000  | -0.572144000 |
| H  | -1.570330000 | 1.730626000  | 1.408367000  |
| H  | -2.786084000 | 3.885365000  | -1.616298000 |
| H  | 3.305787000  | 1.373924000  | -1.881586000 |
| O  | 2.913127000  | 0.765085000  | 0.056362000  |
| C  | 4.244715000  | 0.757860000  | 0.309326000  |
| C  | 4.509175000  | 0.579395000  | 1.776213000  |
| H  | 3.739487000  | 1.062107000  | 2.380916000  |
| H  | 4.500087000  | -0.495961000 | 1.985383000  |
| H  | 5.496654000  | 0.974153000  | 2.019289000  |
| O  | 5.096127000  | 0.849731000  | -0.553518000 |
| H  | 0.123356000  | 0.100332000  | 3.160356000  |
| N  | 0.256296000  | -1.607653000 | 2.053697000  |

|   |              |              |              |
|---|--------------|--------------|--------------|
| C | -0.341492000 | -2.728179000 | 1.340075000  |
| H | 0.127977000  | -2.822881000 | 0.356785000  |
| H | -0.176639000 | -3.658463000 | 1.897620000  |
| H | -1.412312000 | -2.569200000 | 1.217926000  |
| C | 1.712520000  | -1.594036000 | 2.137563000  |
| H | 2.068250000  | -2.515505000 | 2.613546000  |
| H | 2.147150000  | -1.517765000 | 1.140105000  |
| H | 2.038227000  | -0.742333000 | 2.735825000  |
| O | -3.773466000 | -2.318525000 | 0.391822000  |
| C | -4.307564000 | -2.466958000 | -0.756615000 |
| O | -4.391109000 | -1.536220000 | -1.618027000 |
| C | -4.876285000 | -3.826413000 | -1.092840000 |
| H | -4.102954000 | -4.588712000 | -0.957966000 |
| H | -5.688975000 | -4.057433000 | -0.396532000 |
| H | -5.252961000 | -3.860202000 | -2.115596000 |

### TS4III<sub>2a</sub>

|    |              |              |              |
|----|--------------|--------------|--------------|
| Pd | -2.846408000 | 0.011639000  | 0.398128000  |
| O  | -1.763965000 | -0.090033000 | 2.661397000  |
| C  | -1.002559000 | 0.874367000  | 2.871272000  |
| C  | 2.809637000  | 3.417813000  | -2.604765000 |
| C  | 3.758945000  | 2.494406000  | -1.882108000 |
| O  | 4.752637000  | 2.020690000  | -2.396119000 |
| O  | 3.540161000  | 2.222315000  | -0.570835000 |
| H  | 3.195988000  | 3.584765000  | -3.609976000 |
| H  | 1.810440000  | 2.981208000  | -2.664453000 |
| H  | 2.730885000  | 4.376988000  | -2.082531000 |
| C  | 2.774545000  | -4.229287000 | 0.608260000  |
| C  | 1.980248000  | -3.176348000 | -0.121318000 |
| O  | 1.928926000  | -3.051458000 | -1.324970000 |
| O  | 1.321672000  | -2.400304000 | 0.780069000  |
| H  | 2.155758000  | -4.733345000 | 1.355710000  |
| H  | 3.170962000  | -4.953155000 | -0.104127000 |
| H  | 3.602213000  | -3.745005000 | 1.138250000  |
| C  | 1.327226000  | 1.272814000  | -0.031792000 |
| C  | 0.119480000  | 0.048787000  | -1.651052000 |
| C  | 1.863053000  | -0.045177000 | 0.520008000  |
| C  | 0.756264000  | -1.106751000 | 0.438836000  |
| C  | -0.016649000 | -1.017994000 | -0.852283000 |
| O  | 0.934963000  | 1.122738000  | -1.404901000 |
| C  | 2.275909000  | 2.458127000  | 0.071384000  |
| H  | -0.435502000 | 0.165240000  | -2.573108000 |
| H  | 0.073668000  | -0.932397000 | 1.272629000  |
| H  | 0.434287000  | 1.532993000  | 0.556066000  |
| H  | 2.508244000  | 2.625193000  | 1.125490000  |
| H  | 1.786346000  | 3.354848000  | -0.315435000 |
| C  | -2.830324000 | -2.635562000 | -2.596452000 |
| C  | -1.088822000 | -2.057577000 | -1.100528000 |
| C  | -3.989747000 | -2.175529000 | -1.710797000 |
| C  | -3.498456000 | -2.011165000 | -0.280350000 |
| C  | -2.138310000 | -2.010163000 | 0.006692000  |
| O  | -1.661524000 | -1.841727000 | -2.383526000 |
| H  | -0.628760000 | -3.060771000 | -1.079234000 |
| H  | -4.199063000 | -2.265346000 | 0.513862000  |
| H  | -2.599991000 | -3.693516000 | -2.392317000 |
| H  | -4.781583000 | -2.934546000 | -1.733668000 |
| H  | -3.226591000 | 0.588059000  | -1.036962000 |
| H  | -4.425744000 | -1.251887000 | -2.103173000 |
| H  | -3.075452000 | -2.541265000 | -3.657768000 |
| H  | -1.791998000 | -2.309529000 | 0.994357000  |

|   |              |              |              |
|---|--------------|--------------|--------------|
| H | 2.182321000  | 0.081016000  | 1.554438000  |
| O | 2.973677000  | -0.480422000 | -0.274441000 |
| C | 4.186679000  | -0.588575000 | 0.323796000  |
| C | 5.227581000  | -0.949143000 | -0.695795000 |
| H | 6.150879000  | -1.247837000 | -0.198474000 |
| H | 4.864213000  | -1.750246000 | -1.345025000 |
| H | 5.404985000  | -0.063759000 | -1.317575000 |
| O | 4.381187000  | -0.397666000 | 1.507073000  |
| H | -1.244082000 | 1.881810000  | 2.503336000  |
| N | 0.166513000  | 0.799999000  | 3.525641000  |
| C | 0.644399000  | -0.452730000 | 4.098683000  |
| H | -0.032360000 | -1.259168000 | 3.819109000  |
| H | 1.650354000  | -0.672916000 | 3.727571000  |
| H | 0.684177000  | -0.374042000 | 5.190907000  |
| C | 0.998855000  | 1.977277000  | 3.735113000  |
| H | 0.550174000  | 2.845353000  | 3.248103000  |
| H | 1.101535000  | 2.184142000  | 4.806263000  |
| H | 1.996403000  | 1.808904000  | 3.316070000  |
| O | -3.131044000 | 2.167911000  | 0.540722000  |
| C | -3.391217000 | 2.622587000  | -0.621831000 |
| C | -3.618978000 | 4.109389000  | -0.759076000 |
| H | -4.576572000 | 4.364629000  | -0.292209000 |
| H | -2.836121000 | 4.655029000  | -0.225253000 |
| H | -3.639971000 | 4.414107000  | -1.805977000 |
| O | -3.486365000 | 1.889414000  | -1.656174000 |

## HI<sub>2a</sub>

|    |              |              |              |
|----|--------------|--------------|--------------|
| Pd | -2.935796000 | -0.370642000 | 0.284105000  |
| O  | -1.415080000 | -2.029263000 | 0.676455000  |
| C  | -0.364366000 | -1.682247000 | 1.265150000  |
| C  | 6.210206000  | -1.900563000 | -1.762704000 |
| C  | 5.153463000  | -2.003356000 | -0.694581000 |
| O  | 5.323980000  | -2.540113000 | 0.382038000  |
| O  | 3.932646000  | -1.468951000 | -0.941204000 |
| H  | 7.055493000  | -2.525967000 | -1.476302000 |
| H  | 5.829802000  | -2.212515000 | -2.739619000 |
| H  | 6.548861000  | -0.862565000 | -1.848967000 |
| C  | 1.545281000  | 3.598260000  | 2.692731000  |
| C  | 1.165016000  | 2.551026000  | 1.677501000  |
| O  | 0.660869000  | 1.479895000  | 1.943785000  |
| O  | 1.462077000  | 2.995958000  | 0.432374000  |
| H  | 2.635442000  | 3.701881000  | 2.711482000  |
| H  | 1.126523000  | 4.570417000  | 2.417808000  |
| H  | 1.189736000  | 3.300499000  | 3.679386000  |
| C  | 2.461511000  | 0.192215000  | -1.881851000 |
| C  | 0.197859000  | 0.028304000  | -1.238300000 |
| C  | 2.679137000  | 1.323408000  | -0.874924000 |
| C  | 1.374207000  | 2.138954000  | -0.739458000 |
| C  | 0.123528000  | 1.307297000  | -0.852104000 |
| O  | 1.348264000  | -0.643659000 | -1.539241000 |
| C  | 3.658628000  | -0.707256000 | -2.131663000 |
| H  | -0.678570000 | -0.598332000 | -1.360210000 |
| H  | 1.373336000  | 2.875251000  | -1.550560000 |
| H  | 2.239517000  | 0.686390000  | -2.840725000 |
| H  | 4.508047000  | -0.080020000 | -2.408951000 |
| H  | 3.430690000  | -1.394919000 | -2.951794000 |
| C  | -3.020402000 | 2.790085000  | -2.052805000 |
| C  | -1.203778000 | 2.030335000  | -0.741232000 |
| C  | -4.126287000 | 2.103875000  | -1.251070000 |
| C  | -3.586076000 | 1.637509000  | 0.107900000  |

|   |              |              |              |
|---|--------------|--------------|--------------|
| C | -2.176095000 | 1.560637000  | 0.338914000  |
| O | -1.816405000 | 2.021429000  | -2.043184000 |
| H | -0.968126000 | 3.083414000  | -0.496878000 |
| H | -3.303135000 | 2.911843000  | -3.103448000 |
| H | -4.526406000 | 1.269067000  | -1.838117000 |
| H | -4.209081000 | 1.908844000  | 0.963753000  |
| H | -4.954791000 | 2.809085000  | -1.107003000 |
| H | -1.799084000 | 1.760330000  | 1.342130000  |
| H | -2.818609000 | 3.792649000  | -1.638655000 |
| H | 3.475943000  | 1.970050000  | -1.247662000 |
| O | 3.054466000  | 0.843925000  | 0.426266000  |
| C | 4.372223000  | 0.840229000  | 0.736828000  |
| C | 4.601824000  | 0.378279000  | 2.147882000  |
| H | 3.738381000  | 0.575294000  | 2.784384000  |
| H | 4.788339000  | -0.701004000 | 2.122132000  |
| H | 5.492658000  | 0.868810000  | 2.544493000  |
| O | 5.252624000  | 1.146997000  | -0.044796000 |
| H | -0.342310000 | -0.812000000 | 1.930411000  |
| N | 0.811522000  | -2.300230000 | 1.145786000  |
| C | 1.007300000  | -3.425969000 | 0.243348000  |
| H | 1.810849000  | -3.183343000 | -0.457556000 |
| H | 1.282495000  | -4.322727000 | 0.810288000  |
| H | 0.085188000  | -3.613832000 | -0.305621000 |
| C | 1.975968000  | -1.846205000 | 1.897266000  |
| H | 2.227475000  | -2.567146000 | 2.684754000  |
| H | 2.822091000  | -1.750005000 | 1.216991000  |
| H | 1.767793000  | -0.872343000 | 2.340883000  |
| O | -4.475145000 | -2.144824000 | 0.071445000  |
| C | -5.656913000 | -1.794997000 | 0.101901000  |
| O | -6.008558000 | -0.522167000 | 0.264056000  |
| C | -6.815228000 | -2.733169000 | -0.047365000 |
| H | -7.489365000 | -2.631291000 | 0.808346000  |
| H | -7.382031000 | -2.468918000 | -0.946272000 |
| H | -6.459498000 | -3.760298000 | -0.123569000 |
| H | -5.151636000 | -0.009158000 | 0.323216000  |

### III<sub>2a</sub>

|    |              |              |              |
|----|--------------|--------------|--------------|
| Pd | 2.723171000  | -0.360008000 | -0.463380000 |
| O  | 1.536489000  | 1.505721000  | -1.146112000 |
| C  | 1.226687000  | 2.304526000  | -0.237696000 |
| C  | -3.490124000 | 3.333460000  | 1.879592000  |
| C  | -4.386222000 | 2.308870000  | 1.226929000  |
| O  | -5.350558000 | 1.816642000  | 1.778540000  |
| O  | -4.153009000 | 1.955041000  | -0.061723000 |
| H  | -3.882600000 | 3.542488000  | 2.874547000  |
| H  | -2.467264000 | 2.959970000  | 1.958625000  |
| H  | -3.471641000 | 4.259642000  | 1.295748000  |
| C  | -2.851912000 | -4.494877000 | -1.263748000 |
| C  | -2.253063000 | -3.381535000 | -0.442911000 |
| O  | -2.384085000 | -3.254148000 | 0.754556000  |
| O  | -1.541607000 | -2.554078000 | -1.253375000 |
| H  | -2.109803000 | -4.923392000 | -1.942712000 |
| H  | -3.252238000 | -5.265240000 | -0.604141000 |
| H  | -3.662164000 | -4.082680000 | -1.875565000 |
| C  | -1.882415000 | 1.124164000  | -0.543762000 |
| C  | -0.714975000 | 0.029783000  | 1.219865000  |
| C  | -2.307875000 | -0.255584000 | -1.034281000 |
| C  | -1.125631000 | -1.217877000 | -0.857990000 |
| C  | -0.487176000 | -1.072522000 | 0.499659000  |
| O  | -1.512849000 | 1.085483000  | 0.844192000  |

|   |              |              |              |
|---|--------------|--------------|--------------|
| C | -2.908470000 | 2.231959000  | -0.725799000 |
| H | -0.265598000 | 0.196060000  | 2.191683000  |
| H | -0.385513000 | -0.973251000 | -1.626846000 |
| H | -1.004466000 | 1.408720000  | -1.137377000 |
| H | -3.150294000 | 2.314250000  | -1.787772000 |
| H | -2.482177000 | 3.181645000  | -0.397868000 |
| C | 2.248558000  | -1.446531000 | 2.557273000  |
| C | 0.549444000  | -2.102314000 | 0.915620000  |
| C | 3.317038000  | -2.277222000 | 1.854175000  |
| C | 3.053198000  | -2.294850000 | 0.357699000  |
| C | 1.709361000  | -2.145791000 | -0.082923000 |
| O | 0.932569000  | -1.934669000 | 2.286597000  |
| H | 0.068155000  | -3.088525000 | 0.883810000  |
| H | 3.728204000  | -2.913318000 | -0.238173000 |
| H | 2.354169000  | -1.501075000 | 3.645488000  |
| H | 3.292833000  | -3.302489000 | 2.252811000  |
| H | 4.307913000  | -1.867612000 | 2.086202000  |
| H | 2.344313000  | -0.390631000 | 2.255923000  |
| H | 1.417269000  | -2.601749000 | -1.030175000 |
| H | -2.600729000 | -0.210095000 | -2.084461000 |
| O | -3.407771000 | -0.728880000 | -0.246244000 |
| C | -4.612273000 | -0.893469000 | -0.846068000 |
| C | -5.645434000 | -1.260169000 | 0.179731000  |
| H | -6.559556000 | -1.594369000 | -0.312000000 |
| H | -5.260528000 | -2.037447000 | 0.845270000  |
| H | -5.848580000 | -0.367123000 | 0.782499000  |
| O | -4.806965000 | -0.743688000 | -2.035310000 |
| H | 1.443927000  | 2.085348000  | 0.815073000  |
| N | 0.601056000  | 3.472700000  | -0.432694000 |
| C | 0.255061000  | 3.945081000  | -1.767688000 |
| H | 0.559525000  | 3.203495000  | -2.504936000 |
| H | -0.825175000 | 4.108168000  | -1.838222000 |
| H | 0.765418000  | 4.892814000  | -1.971374000 |
| C | 0.228561000  | 4.330126000  | 0.685214000  |
| H | 0.506199000  | 3.857563000  | 1.629262000  |
| H | 0.736722000  | 5.297399000  | 0.606802000  |
| H | -0.852709000 | 4.501554000  | 0.681486000  |
| O | 4.467949000  | 1.228179000  | -0.516011000 |
| C | 5.592697000  | 0.758216000  | -0.330835000 |
| C | 6.845391000  | 1.575934000  | -0.266878000 |
| H | 7.297534000  | 1.467903000  | 0.724538000  |
| H | 7.567745000  | 1.204602000  | -1.000146000 |
| H | 6.621780000  | 2.624780000  | -0.459938000 |
| O | 5.788813000  | -0.546541000 | -0.158629000 |
| H | 4.881708000  | -0.964698000 | -0.196666000 |

### 5e+[Pd(DMF)<sub>2</sub>]

|    |              |              |              |
|----|--------------|--------------|--------------|
| Pd | 2.745796000  | 0.812201000  | -0.317864000 |
| O  | 1.768352000  | -1.109000000 | -1.397558000 |
| C  | 1.344412000  | -2.027781000 | -0.666356000 |
| C  | -5.142608000 | -3.448804000 | 1.880938000  |
| C  | -4.243733000 | -3.114731000 | 0.719447000  |
| O  | -4.272241000 | -3.684652000 | -0.352518000 |
| O  | -3.348654000 | -2.106870000 | 0.870280000  |
| H  | -5.711038000 | -4.345850000 | 1.636770000  |
| H  | -4.568054000 | -3.611566000 | 2.797744000  |
| H  | -5.838950000 | -2.623933000 | 2.067649000  |
| C  | -3.335443000 | 3.475873000  | -2.497274000 |
| C  | -2.313571000 | 2.787325000  | -1.629328000 |
| O  | -1.352607000 | 2.176336000  | -2.043917000 |

|   |              |              |              |
|---|--------------|--------------|--------------|
| O | -2.627905000 | 2.970951000  | -0.320762000 |
| H | -2.971227000 | 3.534170000  | -3.523335000 |
| H | -4.262939000 | 2.892019000  | -2.473468000 |
| H | -3.563265000 | 4.474950000  | -2.116710000 |
| C | -2.419483000 | -0.101669000 | 1.827036000  |
| C | -0.283954000 | 0.483668000  | 0.978787000  |
| C | -3.031567000 | 0.901954000  | 0.851372000  |
| C | -2.105299000 | 2.121618000  | 0.737656000  |
| C | -0.651016000 | 1.728530000  | 0.644056000  |
| O | -1.115561000 | -0.520021000 | 1.400337000  |
| C | -3.249981000 | -1.345517000 | 2.087954000  |
| H | 0.751290000  | 0.155870000  | 0.938871000  |
| H | -2.253348000 | 2.742134000  | 1.627508000  |
| H | -2.323828000 | 0.418337000  | 2.792239000  |
| H | -4.235200000 | -1.035446000 | 2.445602000  |
| H | -2.763436000 | -1.951252000 | 2.858819000  |
| C | 1.741981000  | 2.939727000  | 2.356497000  |
| C | 0.339039000  | 2.856325000  | 0.406483000  |
| C | 3.022982000  | 3.265021000  | 1.595675000  |
| C | 2.895248000  | 2.852057000  | 0.137364000  |
| C | 1.607795000  | 2.577418000  | -0.410901000 |
| O | 0.619281000  | 3.496209000  | 1.677619000  |
| H | -0.200843000 | 3.635100000  | -0.140718000 |
| H | 1.623893000  | 1.850083000  | 2.474155000  |
| H | 3.881630000  | 2.782059000  | 2.079909000  |
| H | 3.660104000  | 3.271050000  | -0.521088000 |
| H | 3.194812000  | 4.350559000  | 1.655543000  |
| H | 1.443901000  | 2.767241000  | -1.472307000 |
| H | 1.748259000  | 3.384140000  | 3.357224000  |
| H | 1.993296000  | -2.508458000 | 0.082734000  |
| N | 0.106822000  | -2.530421000 | -0.703114000 |
| C | -0.917236000 | -1.978099000 | -1.582860000 |
| H | -1.325052000 | -2.773269000 | -2.216266000 |
| H | -1.716373000 | -1.548958000 | -0.978492000 |
| H | -0.471903000 | -1.205022000 | -2.206919000 |
| C | -0.319177000 | -3.575438000 | 0.217084000  |
| H | -1.085004000 | -3.183182000 | 0.890482000  |
| H | -0.738755000 | -4.418391000 | -0.342601000 |
| H | 0.533394000  | -3.928284000 | 0.801522000  |
| O | 4.505026000  | -0.617152000 | 0.106125000  |
| C | 4.689498000  | -1.675239000 | -0.529095000 |
| H | 4.045896000  | -1.945554000 | -1.374929000 |
| N | 5.651052000  | -2.567766000 | -0.257932000 |
| C | 6.592616000  | -2.376285000 | 0.837320000  |
| H | 6.484122000  | -3.182733000 | 1.571226000  |
| H | 7.618319000  | -2.390054000 | 0.453407000  |
| H | 6.398636000  | -1.419000000 | 1.319573000  |
| C | 5.782747000  | -3.793529000 | -1.034508000 |
| H | 6.776445000  | -3.847129000 | -1.492423000 |
| H | 5.649687000  | -4.667389000 | -0.386904000 |
| H | 5.027108000  | -3.818479000 | -1.822424000 |
| O | -3.148086000 | 0.330380000  | -0.461293000 |
| H | -4.018777000 | 1.206093000  | 1.203386000  |
| C | -4.369119000 | -0.086935000 | -0.878464000 |
| C | -4.267216000 | -0.748522000 | -2.223083000 |
| H | -5.225826000 | -0.682567000 | -2.739948000 |
| H | -3.471437000 | -0.305842000 | -2.825066000 |
| H | -4.031968000 | -1.805075000 | -2.049914000 |
| O | -5.385954000 | 0.033556000  | -0.225385000 |

**4e+[Pd(DMF)<sub>2</sub>]**

|    |              |              |              |
|----|--------------|--------------|--------------|
| Pd | 2.684467000  | -1.161789000 | -0.331895000 |
| C  | -3.984329000 | 2.793567000  | 2.803979000  |
| C  | -4.691932000 | 2.127456000  | 1.650040000  |
| O  | -5.758240000 | 1.555482000  | 1.759930000  |
| O  | -4.154704000 | 2.218811000  | 0.407386000  |
| H  | -4.603044000 | 2.680515000  | 3.693924000  |
| H  | -3.006910000 | 2.338217000  | 2.976326000  |
| H  | -3.832376000 | 3.858808000  | 2.600703000  |
| C  | -2.752180000 | -3.599967000 | -2.459591000 |
| C  | -2.289521000 | -2.857067000 | -1.232085000 |
| O  | -2.634708000 | -3.106558000 | -0.097642000 |
| O  | -1.424798000 | -1.876201000 | -1.597694000 |
| H  | -3.385053000 | -2.935760000 | -3.058447000 |
| H  | -1.900307000 | -3.890572000 | -3.080921000 |
| H  | -3.322152000 | -4.481498000 | -2.165176000 |
| C  | -1.830297000 | 1.410137000  | 0.191766000  |
| C  | -1.066309000 | -0.271069000 | 1.683969000  |
| C  | -2.134633000 | 0.302392000  | -0.812282000 |
| C  | -1.043069000 | -0.776969000 | -0.725421000 |
| C  | -0.690929000 | -1.105907000 | 0.705827000  |
| O  | -1.779050000 | 0.891618000  | 1.527602000  |
| C  | -2.786915000 | 2.595021000  | 0.176422000  |
| H  | -0.822702000 | -0.444532000 | 2.724920000  |
| H  | -0.149344000 | -0.390292000 | -1.223523000 |
| H  | -0.842652000 | 1.814595000  | -0.063385000 |
| H  | -2.769462000 | 3.042828000  | -0.819749000 |
| H  | -2.448048000 | 3.346154000  | 0.893413000  |
| C  | 1.509593000  | -3.306771000 | 2.681111000  |
| C  | 0.155181000  | -2.327806000 | 1.013495000  |
| C  | 2.804097000  | -3.358855000 | 1.868794000  |
| C  | 2.504418000  | -3.124866000 | 0.384230000  |
| C  | 1.232719000  | -2.623258000 | -0.027423000 |
| O  | 0.715731000  | -2.175908000 | 2.321281000  |
| H  | -0.524243000 | -3.198334000 | 1.042272000  |
| H  | 3.022123000  | -3.800672000 | -0.299860000 |
| H  | 0.927920000  | -4.230070000 | 2.521908000  |
| H  | 3.271573000  | -4.342201000 | 2.011243000  |
| H  | 3.511558000  | -2.619186000 | 2.263092000  |
| H  | 1.709088000  | -3.215262000 | 3.753410000  |
| H  | 0.823894000  | -2.957117000 | -0.982078000 |
| O  | 4.772060000  | -0.040578000 | -0.367475000 |
| C  | 4.681982000  | 0.927242000  | 0.414047000  |
| H  | 4.525465000  | 0.779660000  | 1.493749000  |
| N  | 4.755165000  | 2.217130000  | 0.055155000  |
| C  | 4.919826000  | 2.615305000  | -1.336300000 |
| H  | 4.985328000  | 1.725053000  | -1.959357000 |
| H  | 4.062840000  | 3.219989000  | -1.652207000 |
| H  | 5.831611000  | 3.212025000  | -1.447767000 |
| C  | 4.625204000  | 3.288015000  | 1.033713000  |
| H  | 4.467097000  | 2.867384000  | 2.028966000  |
| H  | 5.530853000  | 3.904272000  | 1.047228000  |
| H  | 3.771569000  | 3.924921000  | 0.778313000  |
| O  | 1.984946000  | 0.888271000  | -1.200549000 |
| C  | 1.714354000  | 1.841596000  | -0.444790000 |
| H  | 1.819865000  | 1.761023000  | 0.645116000  |
| N  | 1.280025000  | 3.041081000  | -0.860702000 |
| C  | 1.043630000  | 3.313995000  | -2.272791000 |
| H  | 1.497080000  | 2.527859000  | -2.874947000 |
| H  | -0.033285000 | 3.350217000  | -2.476024000 |
| H  | 1.483279000  | 4.279924000  | -2.537887000 |
| C  | 0.889662000  | 4.077642000  | 0.086471000  |
| H  | 1.084610000  | 3.743876000  | 1.107424000  |

|   |              |              |              |
|---|--------------|--------------|--------------|
| H | 1.455375000  | 4.995215000  | -0.104336000 |
| H | -0.179609000 | 4.297103000  | -0.015686000 |
| O | -3.395645000 | -0.300239000 | -0.489927000 |
| H | -2.172142000 | 0.710291000  | -1.823725000 |
| C | -4.419679000 | -0.165016000 | -1.368617000 |
| O | -4.322877000 | 0.383118000  | -2.447696000 |
| C | -5.666049000 | -0.775369000 | -0.796012000 |
| H | -6.008537000 | -0.132059000 | 0.022723000  |
| H | -6.436422000 | -0.843443000 | -1.564698000 |
| H | -5.447332000 | -1.763319000 | -0.381987000 |

## 5e

|   |              |              |              |
|---|--------------|--------------|--------------|
| C | 5.548878000  | -0.935956000 | -0.319513000 |
| C | 4.512661000  | -0.535881000 | 0.700398000  |
| O | 4.766883000  | 0.085261000  | 1.713433000  |
| O | 3.222578000  | -0.883898000 | 0.481960000  |
| H | 6.535728000  | -0.698731000 | 0.077105000  |
| H | 5.490594000  | -2.002953000 | -0.554622000 |
| H | 5.397413000  | -0.380855000 | -1.251620000 |
| C | -2.085833000 | 3.271258000  | -0.341918000 |
| C | -1.611571000 | 1.863192000  | -0.084089000 |
| O | -1.576766000 | 1.333521000  | 1.003510000  |
| O | -1.265303000 | 1.286828000  | -1.264182000 |
| H | -2.255304000 | 3.780065000  | 0.607416000  |
| H | -1.352055000 | 3.820733000  | -0.938433000 |
| H | -3.021167000 | 3.240039000  | -0.910490000 |
| C | 1.316015000  | -1.430537000 | -0.904735000 |
| C | -0.693543000 | -1.998331000 | 0.173389000  |
| C | 0.789795000  | -0.012327000 | -1.112451000 |
| C | -0.734916000 | -0.063018000 | -1.356448000 |
| C | -1.423529000 | -1.120439000 | -0.528548000 |
| O | 0.671274000  | -2.059731000 | 0.211407000  |
| C | 2.817995000  | -1.556171000 | -0.724480000 |
| H | -1.150708000 | -2.776939000 | 0.774525000  |
| H | -0.882227000 | -0.287761000 | -2.418745000 |
| H | 1.067763000  | -1.995953000 | -1.816968000 |
| H | 3.303173000  | -1.125525000 | -1.604226000 |
| H | 3.083615000  | -2.616113000 | -0.655707000 |
| O | 1.038838000  | 0.781267000  | 0.054012000  |
| C | 2.038986000  | 1.690317000  | 0.011310000  |
| H | 1.284872000  | 0.444713000  | -1.971139000 |
| C | 2.195184000  | 2.351576000  | 1.350562000  |
| H | 2.819843000  | 1.695222000  | 1.967781000  |
| H | 2.698762000  | 3.312426000  | 1.235185000  |
| H | 1.227322000  | 2.475477000  | 1.840963000  |
| O | 2.725409000  | 1.905522000  | -0.968909000 |
| C | -2.937705000 | -1.356875000 | -0.650017000 |
| C | -3.774753000 | -0.134349000 | -0.956057000 |
| C | -4.683335000 | 0.337123000  | -0.099184000 |
| C | -3.709465000 | -1.202646000 | 1.592767000  |
| C | -4.871772000 | -0.265784000 | 1.268092000  |
| H | -3.941877000 | -1.856191000 | 2.438589000  |
| H | -2.813037000 | -0.618939000 | 1.833129000  |
| H | -4.930629000 | 0.524178000  | 2.028209000  |
| H | -5.827806000 | -0.807414000 | 1.310084000  |
| O | -3.441033000 | -2.071689000 | 0.480976000  |
| H | -3.628879000 | 0.321935000  | -1.930958000 |
| H | -5.315978000 | 1.177733000  | -0.378566000 |
| H | -3.083021000 | -2.048709000 | -1.493639000 |

**5e'**

|   |              |              |              |
|---|--------------|--------------|--------------|
| C | 5.414590000  | -1.237084000 | -0.288708000 |
| C | 4.397353000  | -0.877892000 | 0.764783000  |
| O | 4.683352000  | -0.374922000 | 1.833137000  |
| O | 3.088318000  | -1.116940000 | 0.511352000  |
| H | 6.410324000  | -1.125843000 | 0.140079000  |
| H | 5.280449000  | -2.258900000 | -0.655270000 |
| H | 5.318761000  | -0.558552000 | -1.143357000 |
| C | -2.076055000 | 3.539199000  | -0.428889000 |
| C | -1.465639000 | 2.189896000  | -0.143633000 |
| O | -1.290145000 | 1.730631000  | 0.961315000  |
| O | -1.156394000 | 1.586096000  | -1.322865000 |
| H | -2.169486000 | 4.104228000  | 0.499168000  |
| H | -1.473770000 | 4.097452000  | -1.150865000 |
| H | -3.069279000 | 3.391158000  | -0.865504000 |
| C | 1.178029000  | -1.366441000 | -0.955051000 |
| C | -0.906246000 | -1.751270000 | 0.076891000  |
| C | 0.817718000  | 0.109725000  | -1.129869000 |
| C | -0.697217000 | 0.214580000  | -1.401573000 |
| C | -1.518376000 | -0.778929000 | -0.615866000 |
| O | 0.438940000  | -1.964744000 | 0.123551000  |
| C | 2.651875000  | -1.665614000 | -0.745494000 |
| H | -1.446834000 | -2.495282000 | 0.653389000  |
| H | -0.832048000 | -0.000946000 | -2.467897000 |
| H | 0.893448000  | -1.872481000 | -1.890551000 |
| H | 3.204093000  | -1.238451000 | -1.585847000 |
| H | 2.803044000  | -2.749887000 | -0.733911000 |
| O | 1.145590000  | 0.852599000  | 0.048976000  |
| C | 2.291094000  | 1.568252000  | 0.054148000  |
| H | 1.372026000  | 0.519628000  | -1.976829000 |
| C | 2.494942000  | 2.214702000  | 1.393949000  |
| H | 2.919691000  | 1.457349000  | 2.062431000  |
| H | 3.200284000  | 3.041891000  | 1.304072000  |
| H | 1.544857000  | 2.554347000  | 1.811500000  |
| O | 3.056768000  | 1.639372000  | -0.889023000 |
| C | -3.030142000 | -0.738461000 | -0.794780000 |
| C | -3.849631000 | 0.146816000  | 1.255443000  |
| C | -4.575642000 | -2.131926000 | 0.582523000  |
| C | -4.886847000 | -0.953952000 | 1.468628000  |
| H | -5.081550000 | -3.074199000 | 0.785646000  |
| H | -4.894682000 | -1.258323000 | 2.523389000  |
| H | -5.896160000 | -0.577844000 | 1.247552000  |
| H | -2.895294000 | -0.124364000 | 1.725187000  |
| H | -3.211363000 | -0.547903000 | -1.862933000 |
| O | -3.653470000 | 0.379758000  | -0.142068000 |
| C | -3.712366000 | -2.038219000 | -0.432932000 |
| H | -4.172819000 | 1.100339000  | 1.681356000  |
| H | -3.472000000 | -2.898507000 | -1.053207000 |

**4e**

|   |              |              |              |
|---|--------------|--------------|--------------|
| C | 5.224469000  | -1.840088000 | -0.656358000 |
| C | 4.408044000  | -1.262647000 | 0.472393000  |
| O | 4.891401000  | -0.725043000 | 1.448935000  |
| O | 3.057649000  | -1.341585000 | 0.400619000  |
| H | 6.276715000  | -1.809801000 | -0.374641000 |
| H | 4.931236000  | -2.870039000 | -0.881020000 |
| H | 5.083093000  | -1.247367000 | -1.566718000 |
| C | -0.705804000 | 4.010730000  | -0.386700000 |
| C | -0.949144000 | 2.575070000  | 0.003892000  |

|   |              |              |              |
|---|--------------|--------------|--------------|
| O | -1.130522000 | 2.185287000  | 1.135957000  |
| O | -0.945435000 | 1.795518000  | -1.110372000 |
| H | -0.952496000 | 4.667751000  | 0.447957000  |
| H | 0.354952000  | 4.128698000  | -0.637019000 |
| H | -1.286695000 | 4.283881000  | -1.271357000 |
| C | 0.949601000  | -1.443247000 | -0.783355000 |
| C | -0.989234000 | -1.468421000 | 0.569934000  |
| C | 0.747615000  | 0.061020000  | -0.966734000 |
| C | -0.757042000 | 0.354962000  | -1.075204000 |
| C | -1.551667000 | -0.426308000 | -0.057256000 |
| O | 0.289283000  | -1.919500000 | 0.396878000  |
| C | 2.395035000  | -1.906269000 | -0.745376000 |
| H | -1.529324000 | -2.066833000 | 1.293681000  |
| H | -1.069657000 | 0.066166000  | -2.083844000 |
| H | 0.495451000  | -1.930778000 | -1.659879000 |
| H | 2.872784000  | -1.596394000 | -1.678074000 |
| H | 2.423125000  | -2.998751000 | -0.677279000 |
| O | 1.256066000  | 0.779359000  | 0.166222000  |
| C | 2.440164000  | 1.424254000  | 0.037115000  |
| H | 1.259405000  | 0.396079000  | -1.870554000 |
| C | 2.850106000  | 2.028234000  | 1.348958000  |
| H | 3.342312000  | 1.238844000  | 1.928750000  |
| H | 3.561020000  | 2.838108000  | 1.179862000  |
| H | 1.981566000  | 2.384017000  | 1.907045000  |
| O | 3.082326000  | 1.466718000  | -0.993750000 |
| C | -3.021047000 | -0.094947000 | 0.127364000  |
| C | -3.815475000 | -0.430438000 | -1.121662000 |
| H | -3.108039000 | 0.988051000  | 0.313719000  |
| C | -4.953589000 | -1.128412000 | -1.082177000 |
| C | -4.924579000 | -0.791675000 | 1.370535000  |
| C | -5.554986000 | -1.579786000 | 0.223508000  |
| H | -5.163807000 | -1.230556000 | 2.343474000  |
| H | -5.297972000 | 0.244942000  | 1.363221000  |
| H | -6.641725000 | -1.426403000 | 0.220987000  |
| H | -5.392461000 | -2.656969000 | 0.369559000  |
| O | -3.500292000 | -0.798197000 | 1.271502000  |
| H | -3.417580000 | -0.064824000 | -2.065644000 |
| H | -5.480502000 | -1.370462000 | -2.003425000 |

#### 4e'

|   |              |              |              |
|---|--------------|--------------|--------------|
| C | -4.296349000 | -2.193187000 | -1.043499000 |
| C | -4.196427000 | -0.742349000 | -0.641575000 |
| O | -4.611705000 | 0.170486000  | -1.327562000 |
| O | -3.672234000 | -0.429832000 | 0.569915000  |
| H | -4.821788000 | -2.247569000 | -1.996689000 |
| H | -3.303611000 | -2.637005000 | -1.145466000 |
| H | -4.848971000 | -2.766793000 | -0.292107000 |
| C | 2.410307000  | 3.040444000  | -0.221716000 |
| C | 1.476840000  | 1.869020000  | -0.397404000 |
| O | 0.881521000  | 1.600848000  | -1.414701000 |
| O | 1.419378000  | 1.174584000  | 0.770710000  |
| H | 2.354812000  | 3.691479000  | -1.094853000 |
| H | 2.163690000  | 3.603222000  | 0.683111000  |
| H | 3.432769000  | 2.663858000  | -0.111165000 |
| C | -1.407262000 | -1.319893000 | 1.026074000  |
| C | 0.089750000  | -1.870311000 | -0.713659000 |
| C | -0.743559000 | 0.050643000  | 1.129333000  |
| C | 0.769252000  | -0.112848000 | 0.884060000  |
| C | 1.068746000  | -1.098067000 | -0.221842000 |
| O | -1.208873000 | -1.873187000 | -0.289360000 |

|   |              |              |              |
|---|--------------|--------------|--------------|
| C | -2.895443000 | -1.356678000 | 1.346667000  |
| H | 0.255627000  | -2.607216000 | -1.495099000 |
| H | 1.199683000  | -0.497338000 | 1.815043000  |
| H | -0.916440000 | -1.982545000 | 1.754952000  |
| H | -3.027709000 | -1.047100000 | 2.386200000  |
| H | -3.265186000 | -2.380012000 | 1.247938000  |
| C | 4.399442000  | -1.420936000 | 1.070758000  |
| C | 2.507645000  | -1.410383000 | -0.577432000 |
| C | 5.107846000  | -0.343363000 | 0.292857000  |
| C | 4.560131000  | -0.315551000 | -1.132477000 |
| H | 2.499783000  | -2.215244000 | -1.335226000 |
| H | 4.902169000  | -1.209501000 | -1.678965000 |
| H | 4.869454000  | -1.804676000 | 1.974355000  |
| H | 6.188890000  | -0.530649000 | 0.273094000  |
| H | 4.901766000  | 0.567070000  | -1.680873000 |
| H | 4.967828000  | 0.635557000  | 0.772832000  |
| H | -0.912794000 | 0.482076000  | 2.117651000  |
| O | -1.307491000 | 0.904232000  | 0.130789000  |
| C | -1.874380000 | 2.068776000  | 0.518373000  |
| C | -2.438965000 | 2.780882000  | -0.677199000 |
| H | -2.745324000 | 3.790639000  | -0.401948000 |
| H | -1.693910000 | 2.808168000  | -1.476738000 |
| H | -3.302590000 | 2.209556000  | -1.035809000 |
| O | -1.922278000 | 2.456650000  | 1.668929000  |
| C | 3.237998000  | -1.927262000 | 0.648729000  |
| H | 2.745835000  | -2.740611000 | 1.177828000  |
| O | 3.134505000  | -0.251155000 | -1.133515000 |

### DMF

|   |              |              |              |
|---|--------------|--------------|--------------|
| C | -0.864407000 | -0.644192000 | -0.000003000 |
| O | -1.961589000 | -0.089115000 | -0.000004000 |
| H | -0.760810000 | -1.745543000 | -0.000032000 |
| N | 0.340577000  | -0.022007000 | 0.000042000  |
| C | 0.434810000  | 1.428884000  | -0.000012000 |
| H | 0.973735000  | 1.777600000  | 0.889170000  |
| H | 0.973750000  | 1.777534000  | -0.889206000 |
| H | -0.572251000 | 1.846651000  | -0.000002000 |
| C | 1.587378000  | -0.767601000 | -0.000006000 |
| H | 2.183234000  | -0.525319000 | -0.888585000 |
| H | 2.183135000  | -0.525656000 | 0.888734000  |
| H | 1.381198000  | -1.840847000 | -0.000217000 |

### AcOAg

|    |              |              |              |
|----|--------------|--------------|--------------|
| Ag | 1.136500000  | -0.002863000 | -0.000020000 |
| O  | -0.946005000 | -1.100529000 | 0.000050000  |
| C  | -1.555425000 | 0.015233000  | 0.000237000  |
| O  | -0.963920000 | 1.136493000  | -0.000104000 |
| C  | -3.074939000 | -0.017734000 | -0.000005000 |
| H  | -3.427551000 | -0.562291000 | 0.881909000  |
| H  | -3.498972000 | 0.987568000  | -0.000657000 |
| H  | -3.427405000 | -0.563437000 | -0.881261000 |

### AcOH

|   |             |              |              |
|---|-------------|--------------|--------------|
| H | 1.726458000 | -0.814063000 | 0.000102000  |
| O | 0.778685000 | -1.042755000 | 0.000047000  |
| C | 0.091256000 | 0.122003000  | -0.000054000 |
| O | 0.642838000 | 1.204275000  | -0.000033000 |

|   |              |              |              |
|---|--------------|--------------|--------------|
| C | -1.394402000 | -0.111542000 | -0.000004000 |
| H | -1.680587000 | -0.691833000 | 0.882936000  |
| H | -1.918632000 | 0.843945000  | -0.000597000 |
| H | -1.680542000 | -0.692972000 | -0.882200000 |

### AgCl

|    |             |             |              |
|----|-------------|-------------|--------------|
| Ag | 0.000000000 | 0.000000000 | 0.641321000  |
| Cl | 0.000000000 | 0.000000000 | -1.773064000 |

## (2) Computational investigation of the Pd-catalyzed C–C coupling of between 1a and 3a

### 1a

|   |              |              |              |
|---|--------------|--------------|--------------|
| C | 5.122435000  | -0.821687000 | -0.138412000 |
| C | 4.147188000  | -0.991992000 | 1.001849000  |
| O | 4.379597000  | -0.650199000 | 2.140959000  |
| O | 2.939250000  | -1.565243000 | 0.752762000  |
| H | 6.059232000  | -0.445988000 | 0.272374000  |
| H | 5.304497000  | -1.767419000 | -0.657376000 |
| H | 4.746967000  | -0.101059000 | -0.872807000 |
| C | -1.077932000 | 3.362532000  | 1.228228000  |
| C | -0.858814000 | 1.890081000  | 1.015902000  |
| O | -0.668009000 | 1.067436000  | 1.885274000  |
| O | -0.902556000 | 1.600980000  | -0.312868000 |
| H | -1.130488000 | 3.576361000  | 2.295783000  |
| H | -0.245456000 | 3.915888000  | 0.781989000  |
| H | -1.997197000 | 3.687040000  | 0.732108000  |
| C | 1.080728000  | -1.592490000 | -0.772280000 |
| C | -1.050403000 | -2.010019000 | 0.183054000  |
| C | 0.839183000  | -0.109640000 | -0.490477000 |
| C | -0.622909000 | 0.257496000  | -0.764282000 |
| C | -1.513891000 | -0.814530000 | -0.199408000 |
| O | 0.255377000  | -2.387919000 | 0.100348000  |
| C | 2.527658000  | -1.994631000 | -0.556746000 |
| H | -1.673339000 | -2.794866000 | 0.598638000  |
| H | -0.769267000 | 0.337351000  | -1.845505000 |
| H | 0.810778000  | -1.826451000 | -1.811665000 |
| H | 3.126731000  | -1.545226000 | -1.348439000 |
| H | 2.622814000  | -3.082951000 | -0.617307000 |
| I | -3.620539000 | -0.412655000 | -0.105122000 |
| H | 1.092085000  | 0.107706000  | 0.544997000  |
| O | 1.684509000  | 0.643468000  | -1.376601000 |
| C | 2.328965000  | 1.730474000  | -0.865884000 |
| C | 3.171607000  | 2.382023000  | -1.925577000 |
| H | 3.735902000  | 3.206310000  | -1.489937000 |
| H | 3.854670000  | 1.651571000  | -2.369242000 |
| H | 2.526183000  | 2.758491000  | -2.725806000 |
| O | 2.219530000  | 2.100011000  | 0.283609000  |

### B<sub>1a</sub>

|    |              |              |              |
|----|--------------|--------------|--------------|
| Pd | 1.472078000  | -1.079032000 | -0.502524000 |
| C  | 4.151637000  | -2.671494000 | 0.146134000  |
| O  | 2.927618000  | -2.652455000 | -0.120800000 |
| C  | -5.787779000 | -2.696766000 | 0.044026000  |
| C  | -5.372484000 | -1.747783000 | -1.055186000 |
| O  | -6.150471000 | -1.041781000 | -1.660142000 |

|   |              |              |              |
|---|--------------|--------------|--------------|
| O | -4.059867000 | -1.676151000 | -1.398336000 |
| H | -6.875549000 | -2.685206000 | 0.107797000  |
| H | -5.444864000 | -3.716791000 | -0.153225000 |
| H | -5.375705000 | -2.383969000 | 1.009462000  |
| C | -2.417694000 | 3.994830000  | 0.383551000  |
| C | -2.005758000 | 2.673792000  | -0.205638000 |
| O | -2.253302000 | 2.293915000  | -1.331497000 |
| O | -1.303293000 | 1.955994000  | 0.706863000  |
| H | -2.942517000 | 4.585243000  | -0.367659000 |
| H | -3.071692000 | 3.819870000  | 1.243135000  |
| H | -1.537594000 | 4.538996000  | 0.739426000  |
| C | -1.808166000 | -1.582997000 | -0.545777000 |
| C | -0.139247000 | -0.453495000 | -1.791530000 |
| C | -2.135514000 | -0.276733000 | 0.174888000  |
| C | -0.891758000 | 0.597914000  | 0.418266000  |
| C | 0.116981000  | 0.426943000  | -0.722020000 |
| O | -1.254366000 | -1.266261000 | -1.828314000 |
| C | -3.034882000 | -2.451482000 | -0.748551000 |
| H | 0.243793000  | -0.289393000 | -2.793444000 |
| H | -0.437212000 | 0.289021000  | 1.360362000  |
| H | -1.066295000 | -2.163597000 | 0.025974000  |
| H | -3.354567000 | -2.819058000 | 0.226513000  |
| H | -2.784929000 | -3.305923000 | -1.384927000 |
| I | 1.340586000  | 2.241742000  | -1.215434000 |
| H | 4.552041000  | -3.504685000 | 0.737234000  |
| C | 6.474555000  | -1.969509000 | 0.155948000  |
| H | 7.087374000  | -2.087116000 | -0.743923000 |
| H | 6.831561000  | -1.098372000 | 0.713927000  |
| H | 6.579001000  | -2.859882000 | 0.778598000  |
| C | 4.789949000  | -0.624304000 | -1.061484000 |
| H | 5.174320000  | -0.798601000 | -2.072680000 |
| H | 3.711467000  | -0.446268000 | -1.115779000 |
| H | 5.278304000  | 0.259097000  | -0.642361000 |
| N | 5.074274000  | -1.777870000 | -0.215231000 |
| H | -2.858006000 | 0.266653000  | -0.427635000 |
| O | -2.721501000 | -0.607038000 | 1.449312000  |
| C | -3.803418000 | 0.112397000  | 1.852316000  |
| C | -4.278054000 | -0.365043000 | 3.196604000  |
| H | -4.440148000 | -1.446713000 | 3.183003000  |
| H | -3.508762000 | -0.156812000 | 3.947710000  |
| H | -5.200531000 | 0.149545000  | 3.465578000  |
| O | -4.296111000 | 1.013512000  | 1.206123000  |
| O | 0.755609000  | -0.906977000 | 3.037141000  |
| C | 1.890982000  | -0.620384000 | 2.646694000  |
| N | 2.378142000  | 0.632688000  | 2.492608000  |
| C | 1.581917000  | 1.798232000  | 2.847250000  |
| H | 2.120977000  | 2.408002000  | 3.581731000  |
| H | 1.379131000  | 2.411282000  | 1.963648000  |
| H | 0.638654000  | 1.464803000  | 3.279067000  |
| C | 3.726720000  | 0.872403000  | 2.003210000  |
| H | 3.696942000  | 1.465967000  | 1.083428000  |
| H | 4.315418000  | 1.415944000  | 2.752070000  |
| H | 4.220053000  | -0.078874000 | 1.791467000  |
| H | 2.633297000  | -1.394958000 | 2.388973000  |

### TS1<sub>1a</sub>

|    |              |              |              |
|----|--------------|--------------|--------------|
| Pd | 1.515881000  | -1.008851000 | -0.589115000 |
| C  | 4.293026000  | -2.506273000 | 0.093891000  |
| O  | 3.102771000  | -2.526630000 | -0.290708000 |
| C  | -6.232166000 | -2.277352000 | 0.099246000  |

|   |              |              |              |
|---|--------------|--------------|--------------|
| C | -5.789769000 | -1.316849000 | -0.978636000 |
| O | -6.529726000 | -0.518906000 | -1.511955000 |
| O | -4.491883000 | -1.339035000 | -1.383118000 |
| H | -7.307951000 | -2.166743000 | 0.232454000  |
| H | -6.001767000 | -3.313883000 | -0.165219000 |
| H | -5.735289000 | -2.055090000 | 1.049741000  |
| C | -1.704780000 | 4.086554000  | 0.348013000  |
| C | -1.669441000 | 2.690427000  | -0.210702000 |
| O | -2.033035000 | 2.363034000  | -1.321378000 |
| O | -1.156329000 | 1.836530000  | 0.709340000  |
| H | -2.159712000 | 4.762842000  | -0.375868000 |
| H | -2.271515000 | 4.102778000  | 1.283641000  |
| H | -0.683925000 | 4.413259000  | 0.570905000  |
| C | -2.203449000 | -1.526042000 | -0.659908000 |
| C | -0.479177000 | -0.523561000 | -1.902471000 |
| C | -2.353529000 | -0.228903000 | 0.133543000  |
| C | -0.986526000 | 0.435342000  | 0.390703000  |
| C | -0.060413000 | 0.138641000  | -0.773608000 |
| O | -1.662663000 | -1.202403000 | -1.954435000 |
| C | -3.519473000 | -2.253596000 | -0.846288000 |
| H | 0.012502000  | -0.471215000 | -2.867035000 |
| H | -0.573582000 | 0.026063000  | 1.313971000  |
| H | -1.499163000 | -2.207915000 | -0.156941000 |
| H | -3.820085000 | -2.654959000 | 0.121478000  |
| H | -3.390471000 | -3.084119000 | -1.546981000 |
| I | 1.699357000  | 1.908437000  | -1.155115000 |
| H | 4.674187000  | -3.338097000 | 0.700736000  |
| C | 6.544771000  | -1.649132000 | 0.417000000  |
| H | 7.295014000  | -1.659295000 | -0.380260000 |
| H | 6.726949000  | -0.781313000 | 1.059695000  |
| H | 6.642060000  | -2.559071000 | 1.011939000  |
| C | 4.941063000  | -0.409325000 | -1.006667000 |
| H | 5.716341000  | -0.344519000 | -1.776840000 |
| H | 3.967341000  | -0.508726000 | -1.485092000 |
| H | 4.955248000  | 0.507319000  | -0.409806000 |
| N | 5.206239000  | -1.566401000 | -0.159936000 |
| H | -2.994086000 | 0.444235000  | -0.430273000 |
| O | -2.965220000 | -0.539306000 | 1.397845000  |
| C | -3.950183000 | 0.292038000  | 1.840652000  |
| C | -4.462184000 | -0.168820000 | 3.176602000  |
| H | -4.664460000 | -1.243125000 | 3.164934000  |
| H | -3.694000000 | 0.014323000  | 3.936115000  |
| H | -5.365107000 | 0.384381000  | 3.435562000  |
| O | -4.331998000 | 1.269314000  | 1.233322000  |
| O | 0.659222000  | -1.310393000 | 2.749804000  |
| C | 1.819460000  | -0.942567000 | 2.534953000  |
| N | 2.265460000  | 0.332175000  | 2.605236000  |
| C | 1.378599000  | 1.419555000  | 2.991709000  |
| H | 1.842251000  | 2.004721000  | 3.793592000  |
| H | 1.178718000  | 2.080461000  | 2.142160000  |
| H | 0.437335000  | 1.001461000  | 3.347833000  |
| C | 3.644185000  | 0.679053000  | 2.297960000  |
| H | 3.678485000  | 1.396802000  | 1.471414000  |
| H | 4.130249000  | 1.128972000  | 3.171924000  |
| H | 4.198658000  | -0.216008000 | 2.008562000  |
| H | 2.618261000  | -1.656735000 | 2.275273000  |

### C<sub>1a</sub>

|    |             |              |              |
|----|-------------|--------------|--------------|
| Pd | 1.761781000 | 0.576708000  | -0.876020000 |
| C  | 4.573969000 | -0.949494000 | -0.715270000 |

|   |              |              |              |
|---|--------------|--------------|--------------|
| O | 3.818999000  | -0.091232000 | -1.234291000 |
| C | -6.650950000 | 0.180017000  | -0.110471000 |
| C | -5.755294000 | 1.242258000  | 0.481766000  |
| O | -5.924649000 | 1.725051000  | 1.580726000  |
| O | -4.711235000 | 1.706249000  | -0.254088000 |
| H | -7.464395000 | -0.004950000 | 0.590449000  |
| H | -7.063345000 | 0.501610000  | -1.071958000 |
| H | -6.107270000 | -0.755331000 | -0.275336000 |
| C | 0.018256000  | -1.077577000 | 3.106417000  |
| C | -0.519914000 | -0.240582000 | 1.976192000  |
| O | -0.921684000 | 0.899112000  | 2.080459000  |
| O | -0.468437000 | -0.931347000 | 0.810168000  |
| H | -0.300492000 | -0.650223000 | 4.057936000  |
| H | -0.320094000 | -2.112650000 | 3.023998000  |
| H | 1.112673000  | -1.074807000 | 3.067599000  |
| C | -2.858794000 | 0.853178000  | -1.538907000 |
| C | -0.790339000 | 1.996513000  | -1.306125000 |
| C | -2.447014000 | -0.021091000 | -0.352422000 |
| C | -0.948128000 | -0.321567000 | -0.421016000 |
| C | -0.166416000 | 0.905021000  | -0.840235000 |
| O | -2.145686000 | 2.096627000  | -1.510786000 |
| C | -4.345405000 | 1.165096000  | -1.536792000 |
| H | -0.285585000 | 2.920943000  | -1.564939000 |
| H | -0.804253000 | -1.125790000 | -1.146153000 |
| H | -2.619767000 | 0.332009000  | -2.478253000 |
| H | -4.893839000 | 0.254810000  | -1.775772000 |
| H | -4.564122000 | 1.917719000  | -2.299834000 |
| I | 2.332688000  | 2.767534000  | 0.509307000  |
| H | 5.405369000  | -1.347232000 | -1.309210000 |
| C | 5.490524000  | -2.402383000 | 0.999731000  |
| H | 6.030258000  | -1.972366000 | 1.849359000  |
| H | 4.998234000  | -3.325019000 | 1.321462000  |
| H | 6.201724000  | -2.634521000 | 0.205527000  |
| C | 3.487540000  | -0.999679000 | 1.478168000  |
| H | 3.765028000  | -0.029492000 | 1.900889000  |
| H | 2.509098000  | -0.903065000 | 1.000093000  |
| H | 3.416855000  | -1.738113000 | 2.276972000  |
| N | 4.489694000  | -1.452071000 | 0.514222000  |
| H | -2.697385000 | 0.480007000  | 0.579649000  |
| O | -3.186286000 | -1.255820000 | -0.470952000 |
| C | -3.574902000 | -1.879258000 | 0.673695000  |
| C | -4.276962000 | -3.170293000 | 0.354409000  |
| H | -4.997211000 | -3.032942000 | -0.456236000 |
| H | -3.535832000 | -3.903754000 | 0.018239000  |
| H | -4.776524000 | -3.546957000 | 1.247077000  |
| O | -3.362507000 | -1.444726000 | 1.785926000  |
| O | 0.463776000  | -2.556043000 | -2.643272000 |
| C | 1.194433000  | -2.867165000 | -1.696007000 |
| N | 0.799354000  | -3.507756000 | -0.575135000 |
| C | -0.588631000 | -3.895470000 | -0.370761000 |
| H | -0.658388000 | -4.978509000 | -0.217420000 |
| H | -0.992022000 | -3.386361000 | 0.509540000  |
| H | -1.168871000 | -3.616880000 | -1.249807000 |
| C | 1.729162000  | -3.797476000 | 0.503810000  |
| H | 1.438953000  | -3.257781000 | 1.411570000  |
| H | 1.735747000  | -4.871642000 | 0.722458000  |
| H | 2.737039000  | -3.492100000 | 0.215291000  |
| H | 2.275561000  | -2.638922000 | -1.691365000 |

**DI<sub>1a</sub>**

|    |              |              |              |
|----|--------------|--------------|--------------|
| Pd | 1.601644000  | -0.064916000 | -0.241602000 |
| C  | 0.251252000  | 2.545997000  | 0.406524000  |
| O  | 0.884492000  | 1.942910000  | -0.501979000 |
| C  | -4.312504000 | 2.278773000  | -2.565417000 |
| C  | -4.295582000 | 2.062307000  | -1.073379000 |
| O  | -4.127155000 | 2.956529000  | -0.267363000 |
| O  | -4.539035000 | 0.820416000  | -0.583070000 |
| H  | -4.201110000 | 3.345315000  | -2.758608000 |
| H  | -3.499289000 | 1.730246000  | -3.044679000 |
| H  | -5.256728000 | 1.930261000  | -2.996684000 |
| C  | -0.008912000 | -1.181704000 | 3.659112000  |
| C  | -0.555456000 | -0.735968000 | 2.330864000  |
| O  | -0.843650000 | 0.408521000  | 2.041683000  |
| O  | -0.653242000 | -1.784807000 | 1.483032000  |
| H  | -0.117453000 | -0.380091000 | 4.390101000  |
| H  | -0.521975000 | -2.082443000 | 4.004933000  |
| H  | 1.053624000  | -1.423830000 | 3.542544000  |
| C  | -3.062074000 | -0.955864000 | -1.345824000 |
| C  | -0.881921000 | 0.013445000  | -1.724324000 |
| C  | -2.583521000 | -1.171843000 | 0.095884000  |
| C  | -1.111627000 | -1.583555000 | 0.118366000  |
| C  | -0.289939000 | -0.623726000 | -0.708915000 |
| O  | -2.217426000 | -0.057981000 | -2.072533000 |
| C  | -4.469043000 | -0.370902000 | -1.388847000 |
| H  | -0.374128000 | 0.705653000  | -2.384645000 |
| H  | -1.041569000 | -2.594299000 | -0.291638000 |
| H  | -3.077837000 | -1.926949000 | -1.860044000 |
| H  | -5.170609000 | -1.076238000 | -0.939462000 |
| H  | -4.772007000 | -0.189371000 | -2.421871000 |
| I  | 4.032087000  | 1.130226000  | 0.831464000  |
| C  | 1.627125000  | -2.739791000 | -2.811999000 |
| C  | 1.672306000  | -2.709205000 | -0.455697000 |
| C  | 3.146818000  | -2.786083000 | -2.788360000 |
| C  | 3.689307000  | -1.848157000 | -1.699123000 |
| C  | 2.828984000  | -1.950892000 | -0.443120000 |
| O  | 1.076662000  | -3.188306000 | -1.539669000 |
| H  | 1.193103000  | -3.031552000 | 0.463106000  |
| H  | 3.726084000  | -0.818694000 | -2.067254000 |
| H  | 1.255998000  | -1.719449000 | -2.971989000 |
| H  | 3.526309000  | -2.506261000 | -3.775568000 |
| H  | 4.717613000  | -2.118824000 | -1.436820000 |
| H  | 3.459377000  | -3.818598000 | -2.593140000 |
| H  | 3.315348000  | -1.889973000 | 0.525577000  |
| H  | 1.192668000  | -3.407084000 | -3.557152000 |
| H  | 0.427175000  | 2.335100000  | 1.461936000  |
| N  | -0.663872000 | 3.473066000  | 0.155598000  |
| C  | -1.322799000 | 4.202156000  | 1.236607000  |
| H  | -1.130439000 | 5.275118000  | 1.132457000  |
| H  | -2.400104000 | 4.022172000  | 1.187054000  |
| H  | -0.941019000 | 3.866150000  | 2.202230000  |
| C  | -1.033504000 | 3.843026000  | -1.209108000 |
| H  | -0.766361000 | 3.038364000  | -1.892479000 |
| H  | -2.111008000 | 4.011328000  | -1.242641000 |
| H  | -0.513569000 | 4.760555000  | -1.507056000 |
| H  | -2.732432000 | -0.276364000 | 0.695263000  |
| O  | -3.394945000 | -2.252648000 | 0.603234000  |
| C  | -3.795715000 | -2.210581000 | 1.900935000  |
| C  | -4.636736000 | -3.415703000 | 2.221554000  |
| H  | -4.043645000 | -4.325614000 | 2.084193000  |
| H  | -4.988479000 | -3.357328000 | 3.251538000  |
| H  | -5.488515000 | -3.471877000 | 1.536978000  |
| O  | -3.509064000 | -1.320023000 | 2.672460000  |

**DII<sub>1a</sub>**

|    |              |              |              |
|----|--------------|--------------|--------------|
| Pd | 1.625407000  | 0.074716000  | -0.695587000 |
| C  | 0.676294000  | 2.662342000  | 0.553816000  |
| O  | 0.934397000  | 2.111481000  | -0.548309000 |
| C  | -4.812759000 | 2.290885000  | -2.256174000 |
| C  | -4.679872000 | 1.947881000  | -0.793153000 |
| O  | -4.547492000 | 2.778993000  | 0.082318000  |
| O  | -4.780297000 | 0.646323000  | -0.411426000 |
| H  | -4.830629000 | 3.376571000  | -2.350220000 |
| H  | -3.972305000 | 1.888813000  | -2.825309000 |
| H  | -5.735954000 | 1.872944000  | -2.670646000 |
| C  | 0.360318000  | -0.569053000 | 3.355589000  |
| C  | -0.405739000 | -0.289717000 | 2.091695000  |
| O  | -0.901725000 | 0.778781000  | 1.795525000  |
| O  | -0.436291000 | -1.390081000 | 1.306471000  |
| H  | 0.202788000  | 0.240270000  | 4.069044000  |
| H  | 0.056855000  | -1.524556000 | 3.790635000  |
| H  | 1.426906000  | -0.633660000 | 3.110686000  |
| C  | -3.089309000 | -0.819525000 | -1.363549000 |
| C  | -1.036217000 | 0.311546000  | -1.863896000 |
| C  | -2.519203000 | -1.057522000 | 0.038283000  |
| C  | -1.013749000 | -1.330449000 | -0.029342000 |
| C  | -0.326503000 | -0.366702000 | -0.957716000 |
| O  | -2.409112000 | 0.256871000  | -2.017212000 |
| C  | -4.566025000 | -0.446800000 | -1.323172000 |
| H  | -0.609752000 | 1.018436000  | -2.566599000 |
| H  | -0.877950000 | -2.356428000 | -0.375761000 |
| H  | -2.975513000 | -1.734730000 | -1.962709000 |
| H  | -5.142408000 | -1.284584000 | -0.927131000 |
| H  | -4.925801000 | -0.222596000 | -2.329404000 |
| I  | 4.187224000  | 0.988793000  | 0.309321000  |
| C  | 1.129560000  | -4.177494000 | -0.871735000 |
| C  | 1.568268000  | -2.162597000 | -2.087464000 |
| C  | 1.881149000  | -3.582717000 | 0.307853000  |
| C  | 3.084018000  | -2.770576000 | -0.182708000 |
| C  | 2.668468000  | -1.841122000 | -1.303896000 |
| O  | 0.733957000  | -3.168168000 | -1.865415000 |
| H  | 1.338241000  | -1.632339000 | -3.006565000 |
| H  | 3.862231000  | -3.445104000 | -0.566058000 |
| H  | 1.743408000  | -4.907578000 | -1.409853000 |
| H  | 2.201345000  | -4.407191000 | 0.953058000  |
| H  | 3.532357000  | -2.203169000 | 0.636460000  |
| H  | 1.211284000  | -2.947161000 | 0.891628000  |
| H  | 3.440579000  | -1.265110000 | -1.808279000 |
| H  | 0.193199000  | -4.652392000 | -0.575234000 |
| H  | 1.233079000  | 2.408648000  | 1.459712000  |
| N  | -0.251162000 | 3.600558000  | 0.699313000  |
| C  | -0.518622000 | 4.196578000  | 2.002056000  |
| H  | -0.436173000 | 5.286269000  | 1.938325000  |
| H  | -1.531587000 | 3.936979000  | 2.327046000  |
| H  | 0.197495000  | 3.827401000  | 2.737986000  |
| C  | -1.144249000 | 3.978941000  | -0.391746000 |
| H  | -2.169029000 | 3.671897000  | -0.154056000 |
| H  | -1.120746000 | 5.064994000  | -0.525461000 |
| H  | -0.824734000 | 3.491022000  | -1.310948000 |
| O  | -3.187935000 | -2.228613000 | 0.552152000  |
| H  | -2.720151000 | -0.199550000 | 0.675233000  |
| C  | -3.485048000 | -2.269925000 | 1.878140000  |
| C  | -4.123614000 | -3.586332000 | 2.226123000  |

|   |              |              |             |
|---|--------------|--------------|-------------|
| H | -3.390479000 | -4.389450000 | 2.094742000 |
| H | -4.464041000 | -3.569192000 | 3.261413000 |
| O | -3.251306000 | -1.369257000 | 2.655470000 |
| H | -4.962529000 | -3.792779000 | 1.555440000 |

### DIII<sub>1a</sub>

|    |              |              |              |
|----|--------------|--------------|--------------|
| Pd | -1.739626000 | -0.337941000 | -0.254887000 |
| C  | -1.387031000 | 2.578793000  | -0.727512000 |
| O  | -1.429699000 | 1.489894000  | -1.362301000 |
| C  | 6.731440000  | -0.299284000 | -0.357806000 |
| C  | 5.835128000  | -1.388084000 | 0.184352000  |
| O  | 6.050743000  | -1.975328000 | 1.222654000  |
| O  | 4.742596000  | -1.759739000 | -0.533132000 |
| H  | 7.562200000  | -0.170518000 | 0.335268000  |
| H  | 7.119425000  | -0.570030000 | -1.345088000 |
| H  | 6.202558000  | 0.652725000  | -0.458207000 |
| C  | 0.476394000  | 1.557096000  | 3.231210000  |
| C  | 0.803725000  | 0.594746000  | 2.122699000  |
| O  | 1.031171000  | -0.590650000 | 2.266679000  |
| O  | 0.802527000  | 1.232529000  | 0.932292000  |
| H  | 0.503111000  | 1.038320000  | 4.189544000  |
| H  | 1.198337000  | 2.378897000  | 3.231631000  |
| H  | -0.517869000 | 1.985462000  | 3.067920000  |
| C  | 2.871274000  | -0.665916000 | -1.609400000 |
| C  | 0.730229000  | -1.678802000 | -1.317850000 |
| C  | 2.592020000  | 0.092036000  | -0.309214000 |
| C  | 1.125646000  | 0.513896000  | -0.290096000 |
| C  | 0.222741000  | -0.651861000 | -0.627052000 |
| O  | 2.052611000  | -1.836898000 | -1.687744000 |
| C  | 4.324718000  | -1.091700000 | -1.737817000 |
| H  | 0.154667000  | -2.536901000 | -1.641552000 |
| H  | 1.002034000  | 1.298600000  | -1.038611000 |
| H  | 2.638043000  | -0.012887000 | -2.464247000 |
| H  | 4.930256000  | -0.212766000 | -1.955322000 |
| H  | 4.424771000  | -1.797691000 | -2.567380000 |
| I  | -4.423578000 | 0.647830000  | 0.311765000  |
| C  | -1.334384000 | -4.556830000 | -0.349486000 |
| C  | -0.998024000 | -2.627483000 | 1.046086000  |
| C  | -2.505178000 | -3.816679000 | -0.973174000 |
| C  | -3.271027000 | -3.043245000 | 0.104469000  |
| C  | -2.301669000 | -2.167476000 | 0.878117000  |
| O  | -0.474953000 | -3.684406000 | 0.465798000  |
| H  | -0.294063000 | -2.133177000 | 1.707122000  |
| H  | -3.748033000 | -3.747617000 | 0.800407000  |
| H  | -1.675603000 | -5.351128000 | 0.322018000  |
| H  | -3.146145000 | -4.553583000 | -1.467150000 |
| H  | -4.068383000 | -2.443298000 | -0.337904000 |
| H  | -2.143620000 | -3.123788000 | -1.741605000 |
| H  | -2.677002000 | -1.589846000 | 1.721019000  |
| H  | -0.661720000 | -4.986240000 | -1.093423000 |
| H  | -1.869521000 | 2.688430000  | 0.247461000  |
| N  | -0.773688000 | 3.664457000  | -1.183171000 |
| C  | -0.067689000 | 3.677195000  | -2.461083000 |
| H  | -0.514687000 | 4.428381000  | -3.119996000 |
| H  | 0.983533000  | 3.932832000  | -2.294423000 |
| H  | -0.136337000 | 2.696157000  | -2.928264000 |
| C  | -0.762306000 | 4.906177000  | -0.415572000 |
| H  | 0.270814000  | 5.189896000  | -0.190255000 |
| H  | -1.231146000 | 5.707334000  | -0.995519000 |
| H  | -1.308681000 | 4.773401000  | 0.519679000  |

|   |             |              |              |
|---|-------------|--------------|--------------|
| H | 2.834652000 | -0.523791000 | 0.554707000  |
| O | 3.421843000 | 1.273801000  | -0.327353000 |
| C | 3.921681000 | 1.721541000  | 0.855110000  |
| C | 4.632594000 | 3.032477000  | 0.664217000  |
| H | 3.879958000 | 3.828159000  | 0.613694000  |
| H | 5.290588000 | 3.221151000  | 1.512976000  |
| H | 5.197035000 | 3.047857000  | -0.270808000 |
| O | 3.784084000 | 1.141441000  | 1.911678000  |

### DIV<sub>1a</sub>

|    |              |              |              |
|----|--------------|--------------|--------------|
| Pd | -1.723432000 | -0.361232000 | -0.286821000 |
| C  | -1.625630000 | 2.699638000  | -0.418964000 |
| O  | -1.886571000 | 1.647283000  | -1.057310000 |
| C  | 6.936924000  | 0.352535000  | -0.778427000 |
| C  | 6.026104000  | -0.840157000 | -0.945565000 |
| O  | 6.366472000  | -1.981259000 | -0.718625000 |
| O  | 4.758492000  | -0.636867000 | -1.387436000 |
| H  | 7.923071000  | -0.010837000 | -0.490113000 |
| H  | 7.017315000  | 0.926343000  | -1.707077000 |
| H  | 6.567312000  | 1.026462000  | 0.000829000  |
| C  | -0.153784000 | -0.452145000 | 3.837334000  |
| C  | -0.085834000 | 0.360096000  | 2.575676000  |
| O  | -0.853379000 | 1.264392000  | 2.292521000  |
| O  | 0.911363000  | -0.059809000 | 1.774680000  |
| H  | -0.792050000 | -1.322209000 | 3.643982000  |
| H  | 0.831784000  | -0.812106000 | 4.138024000  |
| H  | -0.607586000 | 0.140691000  | 4.632754000  |
| C  | 2.783457000  | 0.726141000  | -1.350516000 |
| C  | 0.786072000  | -0.485901000 | -1.772848000 |
| C  | 2.540709000  | 0.440706000  | 0.134868000  |
| C  | 1.053783000  | 0.542670000  | 0.456748000  |
| C  | 0.242948000  | -0.176450000 | -0.590597000 |
| O  | 2.083133000  | -0.226692000 | -2.158757000 |
| C  | 4.252853000  | 0.666587000  | -1.723445000 |
| H  | 0.250610000  | -1.004580000 | -2.561954000 |
| H  | 0.769522000  | 1.595816000  | 0.538859000  |
| H  | 2.415126000  | 1.735927000  | -1.586762000 |
| H  | 4.775927000  | 1.464026000  | -1.193860000 |
| H  | 4.367779000  | 0.826170000  | -2.800143000 |
| I  | -4.582105000 | -0.256166000 | 0.196292000  |
| C  | 0.322664000  | -3.714699000 | -1.144613000 |
| C  | -1.803423000 | -2.625671000 | -0.861710000 |
| C  | 0.144113000  | -4.182311000 | 0.288736000  |
| C  | -0.361015000 | -3.021108000 | 1.157968000  |
| C  | -1.596226000 | -2.421388000 | 0.504600000  |
| O  | -0.914954000 | -3.162872000 | -1.701462000 |
| H  | -2.782732000 | -2.525974000 | -1.322371000 |
| H  | 0.430114000  | -2.280530000 | 1.280817000  |
| H  | 1.090017000  | -2.940465000 | -1.211009000 |
| H  | 1.107377000  | -4.556684000 | 0.649471000  |
| H  | -0.626352000 | -3.374812000 | 2.158515000  |
| H  | -0.569670000 | -5.014198000 | 0.317047000  |
| H  | -2.495398000 | -2.343475000 | 1.108726000  |
| H  | 0.580315000  | -4.531870000 | -1.821247000 |
| H  | -1.354511000 | 2.662112000  | 0.639287000  |
| N  | -1.652823000 | 3.911154000  | -0.966093000 |
| C  | -1.998076000 | 4.122190000  | -2.368425000 |
| H  | -2.917102000 | 4.713513000  | -2.437960000 |
| H  | -1.189625000 | 4.667623000  | -2.865500000 |
| H  | -2.145878000 | 3.161434000  | -2.859282000 |

|   |              |              |              |
|---|--------------|--------------|--------------|
| C | -1.352131000 | 5.101319000  | -0.177678000 |
| H | -0.498443000 | 5.629377000  | -0.614784000 |
| H | -2.216300000 | 5.773590000  | -0.170752000 |
| H | -1.110381000 | 4.819913000  | 0.848705000  |
| H | 2.914492000  | -0.552760000 | 0.385201000  |
| O | 3.234012000  | 1.436680000  | 0.910199000  |
| C | 4.228325000  | 1.035049000  | 1.748573000  |
| C | 4.794450000  | 2.217218000  | 2.484596000  |
| H | 3.998369000  | 2.737213000  | 3.025942000  |
| H | 5.563990000  | 1.884323000  | 3.180873000  |
| H | 5.223705000  | 2.926537000  | 1.769777000  |
| O | 4.596516000  | -0.114745000 | 1.863577000  |

### TS2I<sub>1a</sub>

|    |              |              |              |
|----|--------------|--------------|--------------|
| Pd | 1.756976000  | -0.097064000 | -0.270203000 |
| C  | -0.296553000 | 2.157743000  | -1.083356000 |
| O  | 0.456951000  | 1.267902000  | -1.540819000 |
| C  | -6.385272000 | -0.076761000 | -0.766719000 |
| C  | -5.115820000 | 0.548161000  | -1.288022000 |
| O  | -5.048529000 | 1.701426000  | -1.666285000 |
| O  | -3.995473000 | -0.208943000 | -1.356367000 |
| H  | -7.197807000 | 0.636882000  | -0.900864000 |
| H  | -6.623898000 | -1.006703000 | -1.291598000 |
| H  | -6.284115000 | -0.303505000 | 0.299196000  |
| C  | 0.777965000  | 0.750034000  | 3.600437000  |
| C  | -0.055688000 | 0.403662000  | 2.397481000  |
| O  | -0.596086000 | 1.215290000  | 1.671482000  |
| O  | -0.104777000 | -0.935158000 | 2.225202000  |
| H  | 0.528112000  | 1.754558000  | 3.943850000  |
| H  | 0.643940000  | 0.023677000  | 4.404871000  |
| H  | 1.830914000  | 0.733609000  | 3.295059000  |
| C  | -2.595249000 | -1.953332000 | -0.475970000 |
| C  | -0.389071000 | -1.679348000 | -1.385641000 |
| C  | -2.095966000 | -1.083431000 | 0.690389000  |
| C  | -0.682901000 | -1.547120000 | 1.047666000  |
| C  | 0.191248000  | -1.453455000 | -0.187247000 |
| O  | -1.713638000 | -1.877940000 | -1.616896000 |
| C  | -3.988907000 | -1.585021000 | -0.944679000 |
| H  | 0.165977000  | -1.717389000 | -2.317147000 |
| H  | -0.759299000 | -2.591411000 | 1.370727000  |
| H  | -2.629950000 | -2.999474000 | -0.144286000 |
| H  | -4.684922000 | -1.773705000 | -0.125581000 |
| H  | -4.270132000 | -2.217653000 | -1.792600000 |
| I  | 3.554133000  | 2.003344000  | 0.362276000  |
| C  | 2.950847000  | -3.197585000 | -1.881750000 |
| C  | 1.903003000  | -2.679337000 | 0.169554000  |
| C  | 4.311018000  | -2.966525000 | -1.246869000 |
| C  | 4.245266000  | -1.749181000 | -0.312504000 |
| C  | 2.905416000  | -1.669289000 | 0.443689000  |
| O  | 1.993838000  | -3.539410000 | -0.847260000 |
| H  | 1.345937000  | -3.106854000 | 0.997926000  |
| H  | 4.403903000  | -0.839615000 | -0.897481000 |
| H  | 2.588748000  | -2.300274000 | -2.403598000 |
| H  | 5.061837000  | -2.817857000 | -2.028938000 |
| H  | 5.055324000  | -1.785116000 | 0.423868000  |
| H  | 4.583937000  | -3.872124000 | -0.692423000 |
| H  | 2.983680000  | -1.463475000 | 1.512366000  |
| H  | 2.937580000  | -4.043199000 | -2.570498000 |
| H  | -0.047346000 | 2.707114000  | -0.171169000 |
| N  | -1.449603000 | 2.500864000  | -1.657002000 |

|   |              |              |              |
|---|--------------|--------------|--------------|
| C | -2.245890000 | 3.619359000  | -1.164482000 |
| H | -2.256416000 | 4.430587000  | -1.901853000 |
| H | -3.271697000 | 3.284613000  | -0.991206000 |
| H | -1.821090000 | 3.996032000  | -0.231664000 |
| C | -1.899023000 | 1.834951000  | -2.878259000 |
| H | -1.486353000 | 2.334570000  | -3.763327000 |
| H | -1.572546000 | 0.795367000  | -2.864054000 |
| H | -2.987725000 | 1.865008000  | -2.906909000 |
| H | -2.128160000 | -0.029246000 | 0.428821000  |
| O | -2.931863000 | -1.341062000 | 1.835310000  |
| C | -3.842841000 | -0.402133000 | 2.206164000  |
| C | -4.529381000 | -0.818032000 | 3.477236000  |
| H | -3.789751000 | -0.977457000 | 4.267586000  |
| H | -5.239540000 | -0.048355000 | 3.778989000  |
| H | -5.054179000 | -1.765843000 | 3.320125000  |
| O | -4.065536000 | 0.612744000  | 1.580240000  |

**TS2II<sub>1a</sub>**

|    |              |              |              |
|----|--------------|--------------|--------------|
| Pd | 1.791997000  | 0.082185000  | -0.621699000 |
| C  | 0.253783000  | 2.728513000  | 0.167813000  |
| O  | 0.581757000  | 1.993170000  | -0.788689000 |
| C  | -6.373481000 | 0.682210000  | -0.434721000 |
| C  | -5.068135000 | 1.417021000  | -0.608130000 |
| O  | -4.895936000 | 2.567429000  | -0.258722000 |
| O  | -4.032081000 | 0.776302000  | -1.202704000 |
| H  | -7.115612000 | 1.387365000  | -0.061002000 |
| H  | -6.720426000 | 0.250608000  | -1.378438000 |
| H  | -6.256306000 | -0.128421000 | 0.290558000  |
| C  | 0.746441000  | -0.616874000 | 3.257995000  |
| C  | -0.115828000 | -0.429602000 | 2.039076000  |
| O  | -0.649782000 | 0.614568000  | 1.722073000  |
| O  | -0.196156000 | -1.585162000 | 1.339548000  |
| H  | 0.543704000  | 0.176447000  | 3.978347000  |
| H  | 0.590400000  | -1.597408000 | 3.713189000  |
| H  | 1.794849000  | -0.551740000 | 2.943527000  |
| C  | -2.739956000 | -1.220726000 | -1.483731000 |
| C  | -0.543296000 | -0.580512000 | -2.190822000 |
| C  | -2.198604000 | -1.145108000 | -0.051743000 |
| C  | -0.760658000 | -1.664337000 | 0.005809000  |
| C  | 0.087543000  | -1.026559000 | -1.074436000 |
| O  | -1.871854000 | -0.549949000 | -2.422673000 |
| C  | -4.116062000 | -0.595764000 | -1.621143000 |
| H  | -0.002983000 | -0.188670000 | -3.047716000 |
| H  | -0.792260000 | -2.745932000 | -0.152235000 |
| H  | -2.811444000 | -2.273297000 | -1.787341000 |
| H  | -4.821362000 | -1.171131000 | -1.019764000 |
| H  | -4.436772000 | -0.634701000 | -2.666716000 |
| I  | 4.028934000  | 1.451300000  | 0.341258000  |
| C  | 1.708682000  | -4.217454000 | -0.101990000 |
| C  | 1.601141000  | -2.349498000 | -1.666414000 |
| C  | 2.478937000  | -3.302300000 | 0.835175000  |
| C  | 3.467604000  | -2.447030000 | 0.043654000  |
| C  | 2.755925000  | -1.688845000 | -1.069922000 |
| O  | 1.132925000  | -3.541385000 | -1.267916000 |
| H  | 1.427070000  | -2.203972000 | -2.726301000 |
| H  | 4.223685000  | -3.100634000 | -0.417006000 |
| H  | 2.361958000  | -4.996653000 | -0.510403000 |
| H  | 2.998867000  | -3.935193000 | 1.562267000  |
| H  | 4.003419000  | -1.758252000 | 0.700861000  |
| H  | 1.784857000  | -2.664822000 | 1.384199000  |
| H  | 3.423120000  | -1.300468000 | -1.845565000 |

|   |              |              |              |
|---|--------------|--------------|--------------|
| H | 0.862675000  | -4.698862000 | 0.393787000  |
| H | 0.832917000  | 2.749801000  | 1.096673000  |
| N | -0.795087000 | 3.553027000  | 0.146186000  |
| C | -1.147210000 | 4.361821000  | 1.304281000  |
| H | -1.186025000 | 5.421128000  | 1.028058000  |
| H | -2.130335000 | 4.063309000  | 1.685258000  |
| H | -0.405147000 | 4.229461000  | 2.094310000  |
| C | -1.695047000 | 3.617297000  | -1.000935000 |
| H | -2.707565000 | 3.329590000  | -0.700286000 |
| H | -1.713383000 | 4.638318000  | -1.398753000 |
| H | -1.341706000 | 2.933535000  | -1.771777000 |
| H | -2.264320000 | -0.128801000 | 0.325748000  |
| O | -2.993441000 | -2.034585000 | 0.762110000  |
| C | -3.876770000 | -1.503664000 | 1.647440000  |
| C | -4.515753000 | -2.594317000 | 2.461196000  |
| H | -5.264611000 | -2.166157000 | 3.127311000  |
| H | -4.979209000 | -3.332063000 | 1.799245000  |
| H | -3.749358000 | -3.112696000 | 3.046285000  |
| O | -4.105929000 | -0.316126000 | 1.748369000  |

### TS2III<sub>1a</sub>

|    |              |              |              |
|----|--------------|--------------|--------------|
| Pd | -1.941287000 | -0.149623000 | -0.177412000 |
| C  | -1.143138000 | 2.822936000  | -0.366796000 |
| O  | -1.112127000 | 1.785958000  | -1.071993000 |
| C  | 6.441613000  | 0.377457000  | -1.439031000 |
| C  | 5.728088000  | -0.941046000 | -1.260068000 |
| O  | 6.251046000  | -1.928579000 | -0.791274000 |
| O  | 4.428104000  | -1.043333000 | -1.645648000 |
| H  | 7.486422000  | 0.234941000  | -1.164534000 |
| H  | 6.380053000  | 0.731797000  | -2.472453000 |
| H  | 6.010971000  | 1.149880000  | -0.792681000 |
| C  | 1.757739000  | -1.174884000 | 4.024434000  |
| C  | 1.601006000  | -1.288987000 | 2.533509000  |
| O  | 1.943853000  | -2.238999000 | 1.858745000  |
| O  | 1.012226000  | -0.175061000 | 2.031494000  |
| H  | 2.056425000  | -2.138651000 | 4.437347000  |
| H  | 2.532546000  | -0.431283000 | 4.237350000  |
| H  | 0.827877000  | -0.834992000 | 4.488559000  |
| C  | 2.300383000  | 0.070466000  | -1.536083000 |
| C  | 0.405710000  | -1.343100000 | -1.379382000 |
| C  | 2.368442000  | 0.056714000  | -0.009146000 |
| C  | 0.959688000  | 0.045038000  | 0.592002000  |
| C  | 0.013797000  | -0.858050000 | -0.178746000 |
| O  | 1.578298000  | -1.084937000 | -2.006550000 |
| C  | 3.675208000  | 0.061236000  | -2.177316000 |
| H  | -0.188067000 | -2.041666000 | -1.959134000 |
| H  | 0.592503000  | 1.070729000  | 0.547157000  |
| H  | 1.768048000  | 0.965427000  | -1.879663000 |
| H  | 4.150998000  | 1.022221000  | -1.980787000 |
| H  | 3.579128000  | -0.069130000 | -3.259459000 |
| I  | -4.512899000 | 0.941304000  | 0.029471000  |
| C  | -1.529604000 | -4.223978000 | -0.878945000 |
| C  | -1.026442000 | -2.470035000 | 0.745156000  |
| C  | -2.750835000 | -3.406464000 | -1.268728000 |
| C  | -3.396682000 | -2.812440000 | -0.015531000 |
| C  | -2.382403000 | -1.946164000 | 0.718165000  |
| O  | -0.667330000 | -3.590320000 | 0.119328000  |
| H  | -0.422843000 | -2.319452000 | 1.628745000  |
| H  | -3.713501000 | -3.629008000 | 0.651352000  |
| H  | -1.829982000 | -5.175554000 | -0.428648000 |

|   |              |              |              |
|---|--------------|--------------|--------------|
| H | -3.440272000 | -4.070210000 | -1.800353000 |
| H | -4.290116000 | -2.236594000 | -0.264210000 |
| H | -2.472846000 | -2.600849000 | -1.957490000 |
| H | -2.692253000 | -1.593415000 | 1.706322000  |
| H | -0.882278000 | -4.436176000 | -1.733646000 |
| H | -1.933410000 | 2.978777000  | 0.377611000  |
| N | -0.248373000 | 3.808191000  | -0.448752000 |
| C | 0.882761000  | 3.733567000  | -1.369301000 |
| H | 1.057315000  | 4.721340000  | -1.803862000 |
| H | 1.784986000  | 3.411698000  | -0.837355000 |
| H | 0.660482000  | 3.022690000  | -2.164420000 |
| C | -0.296642000 | 4.958584000  | 0.447240000  |
| H | 0.617185000  | 4.998330000  | 1.049914000  |
| H | -0.375318000 | 5.883495000  | -0.133093000 |
| H | -1.157318000 | 4.881522000  | 1.114075000  |
| H | 2.946349000  | -0.801974000 | 0.323353000  |
| O | 3.030447000  | 1.280666000  | 0.376641000  |
| C | 3.918872000  | 1.234976000  | 1.406764000  |
| C | 4.485729000  | 2.601926000  | 1.666767000  |
| H | 3.684506000  | 3.270386000  | 1.999197000  |
| H | 5.255997000  | 2.541872000  | 2.435490000  |
| H | 4.903022000  | 3.021046000  | 0.746516000  |
| O | 4.191118000  | 0.222412000  | 2.016668000  |

### TS2IV<sub>1a</sub>

|    |              |              |              |
|----|--------------|--------------|--------------|
| Pd | -1.810485000 | -0.199883000 | -0.667535000 |
| C  | -1.766596000 | 2.763015000  | 0.306846000  |
| O  | -2.053772000 | 2.045445000  | -0.679510000 |
| C  | 6.720933000  | 0.404983000  | -0.743632000 |
| C  | 5.705657000  | -0.384477000 | -1.533175000 |
| O  | 5.889331000  | -1.515881000 | -1.925498000 |
| O  | 4.518430000  | 0.202191000  | -1.845223000 |
| H  | 7.637064000  | -0.182505000 | -0.687482000 |
| H  | 6.933769000  | 1.369730000  | -1.214050000 |
| H  | 6.361479000  | 0.594111000  | 0.272375000  |
| C  | 0.132481000  | -1.371926000 | 3.595541000  |
| C  | -0.021306000 | -0.356997000 | 2.497888000  |
| O  | -0.759591000 | 0.608081000  | 2.532718000  |
| O  | 0.803312000  | -0.641837000 | 1.461651000  |
| H  | -0.666630000 | -1.249847000 | 4.326787000  |
| H  | 0.127045000  | -2.389165000 | 3.196655000  |
| H  | 1.100763000  | -1.214402000 | 4.084026000  |
| C  | 2.697964000  | 1.482409000  | -0.961880000 |
| C  | 0.781192000  | 0.469677000  | -2.017374000 |
| C  | 2.451252000  | 0.449585000  | 0.142648000  |
| C  | 0.959878000  | 0.335399000  | 0.412482000  |
| C  | 0.243326000  | -0.029319000 | -0.871225000 |
| O  | 1.902642000  | 1.206018000  | -2.139423000 |
| C  | 4.152029000  | 1.517682000  | -1.399213000 |
| H  | 0.351391000  | 0.280577000  | -2.997033000 |
| H  | 0.587076000  | 1.292322000  | 0.787981000  |
| H  | 2.421471000  | 2.477907000  | -0.594523000 |
| H  | 4.755899000  | 1.860758000  | -0.557957000 |
| H  | 4.276465000  | 2.219683000  | -2.229044000 |
| I  | -4.532940000 | -0.622152000 | -0.152618000 |
| C  | 0.986412000  | -3.484426000 | 0.298962000  |
| C  | 0.005772000  | -2.022843000 | -1.364487000 |
| C  | -0.392038000 | -4.105897000 | 0.457852000  |
| C  | -1.470915000 | -3.012154000 | 0.445572000  |
| C  | -1.345648000 | -2.192911000 | -0.835933000 |

|   |              |              |              |
|---|--------------|--------------|--------------|
| O | 1.088418000  | -2.671066000 | -0.908636000 |
| H | 0.084818000  | -1.872972000 | -2.435536000 |
| H | -1.352252000 | -2.383110000 | 1.331697000  |
| H | 1.244982000  | -2.851275000 | 1.148964000  |
| H | -0.409115000 | -4.668956000 | 1.397205000  |
| H | -2.474890000 | -3.440606000 | 0.503110000  |
| H | -0.568828000 | -4.817179000 | -0.358463000 |
| H | -2.016641000 | -2.516515000 | -1.637799000 |
| H | 1.764018000  | -4.240988000 | 0.172786000  |
| H | -1.511358000 | 2.318356000  | 1.274432000  |
| N | -1.734849000 | 4.097619000  | 0.278662000  |
| C | -2.039836000 | 4.853921000  | -0.929512000 |
| H | -2.902933000 | 5.504676000  | -0.753188000 |
| H | -1.181364000 | 5.476648000  | -1.203052000 |
| H | -2.264398000 | 4.165571000  | -1.743232000 |
| C | -1.404794000 | 4.867203000  | 1.472225000  |
| H | -0.529558000 | 5.497546000  | 1.281757000  |
| H | -2.246148000 | 5.510979000  | 1.750389000  |
| H | -1.183714000 | 4.192520000  | 2.301607000  |
| H | 2.858196000  | -0.523454000 | -0.134860000 |
| O | 3.103490000  | 0.936563000  | 1.327532000  |
| C | 4.026184000  | 0.132415000  | 1.926064000  |
| C | 4.500553000  | 0.752064000  | 3.209782000  |
| H | 3.663338000  | 0.821887000  | 3.912127000  |
| H | 5.293855000  | 0.142459000  | 3.641838000  |
| H | 4.863856000  | 1.767383000  | 3.025872000  |
| O | 4.397665000  | -0.927164000 | 1.466982000  |

### El<sub>1a</sub>

|    |              |              |              |
|----|--------------|--------------|--------------|
| Pd | -2.726126000 | 0.202209000  | 0.281516000  |
| O  | -1.411743000 | -1.452421000 | 0.269617000  |
| C  | -0.440771000 | -1.532093000 | 1.075428000  |
| C  | 6.287812000  | -2.172605000 | -0.824620000 |
| C  | 4.956327000  | -2.460879000 | -0.177198000 |
| O  | 4.837311000  | -3.030955000 | 0.887337000  |
| O  | 3.817001000  | -2.078453000 | -0.811770000 |
| H  | 7.063357000  | -2.659863000 | -0.234388000 |
| H  | 6.322008000  | -2.542284000 | -1.853665000 |
| H  | 6.487980000  | -1.095988000 | -0.844947000 |
| C  | 2.126384000  | 2.823890000  | 2.934665000  |
| C  | 1.805781000  | 1.909545000  | 1.785961000  |
| O  | 1.368766000  | 0.779043000  | 1.886708000  |
| O  | 2.066044000  | 2.518451000  | 0.608206000  |
| H  | 1.799376000  | 2.369043000  | 3.869775000  |
| H  | 3.207965000  | 2.989852000  | 2.964027000  |
| H  | 1.642794000  | 3.795099000  | 2.796566000  |
| C  | 2.797010000  | -0.205076000 | -1.930113000 |
| C  | 0.467016000  | 0.065607000  | -1.581335000 |
| C  | 3.000247000  | 0.644950000  | -0.675745000 |
| C  | 1.977909000  | 1.775949000  | -0.644055000 |
| C  | 0.603640000  | 1.257627000  | -0.985920000 |
| O  | 1.481125000  | -0.781670000 | -1.917481000 |
| C  | 3.809517000  | -1.329600000 | -2.042705000 |
| H  | -0.496943000 | -0.339387000 | -1.861428000 |
| H  | 2.279634000  | 2.541264000  | -1.366716000 |
| H  | 2.891554000  | 0.424465000  | -2.826261000 |
| H  | 4.784268000  | -0.897086000 | -2.264973000 |
| H  | 3.526181000  | -2.003133000 | -2.856356000 |
| I  | -5.104035000 | -1.347824000 | 0.014446000  |
| C  | -2.629553000 | 2.864505000  | -1.930206000 |

|   |              |              |              |
|---|--------------|--------------|--------------|
| C | -0.595170000 | 2.152775000  | -0.758212000 |
| C | -2.948860000 | 3.515358000  | -0.589869000 |
| C | -2.737872000 | 2.516675000  | 0.547411000  |
| C | -1.449369000 | 1.785956000  | 0.451414000  |
| O | -1.356127000 | 2.189437000  | -1.972381000 |
| H | -0.206372000 | 3.165424000  | -0.540326000 |
| H | -3.636327000 | 1.731664000  | 0.425185000  |
| H | -3.403115000 | 2.117078000  | -2.157441000 |
| H | -3.975994000 | 3.890644000  | -0.609183000 |
| H | -2.958873000 | 2.910042000  | 1.542381000  |
| H | -2.287028000 | 4.371189000  | -0.410476000 |
| H | -0.874301000 | 1.668793000  | 1.368527000  |
| H | -2.637785000 | 3.614982000  | -2.729863000 |
| H | -0.358982000 | -0.867573000 | 1.935800000  |
| N | 0.541160000  | -2.412653000 | 0.951987000  |
| C | 0.599157000  | -3.368377000 | -0.150395000 |
| H | 1.561639000  | -3.266385000 | -0.655728000 |
| H | 0.497881000  | -4.386606000 | 0.240482000  |
| H | -0.207884000 | -3.166628000 | -0.852275000 |
| C | 1.580648000  | -2.522125000 | 1.974370000  |
| H | 1.428342000  | -3.433755000 | 2.563555000  |
| H | 2.561213000  | -2.573609000 | 1.495193000  |
| H | 1.547269000  | -1.652242000 | 2.630969000  |
| H | 2.900155000  | 0.017692000  | 0.207731000  |
| O | 4.328974000  | 1.196161000  | -0.747016000 |
| C | 5.064558000  | 1.233927000  | 0.396452000  |
| C | 6.409590000  | 1.851233000  | 0.134144000  |
| H | 7.067008000  | 1.673939000  | 0.985375000  |
| H | 6.851989000  | 1.449546000  | -0.780947000 |
| H | 6.282112000  | 2.930569000  | -0.005646000 |
| O | 4.664200000  | 0.835583000  | 1.470400000  |

### EH<sub>1a</sub>

|    |              |              |              |
|----|--------------|--------------|--------------|
| Pd | 2.826475000  | -0.043272000 | -0.737381000 |
| C  | 0.663276000  | 1.673758000  | 0.324589000  |
| O  | 1.450276000  | 1.565443000  | -0.658966000 |
| C  | -6.395568000 | 2.106946000  | -0.247354000 |
| C  | -4.959064000 | 2.398886000  | 0.107942000  |
| O  | -4.625761000 | 3.073790000  | 1.059838000  |
| O  | -3.972408000 | 1.895977000  | -0.677891000 |
| H  | -7.034245000 | 2.702218000  | 0.404791000  |
| H  | -6.608507000 | 2.350192000  | -1.292428000 |
| H  | -6.626406000 | 1.047209000  | -0.093113000 |
| C  | -1.050664000 | -2.578292000 | 2.997531000  |
| C  | -1.278366000 | -1.707881000 | 1.792845000  |
| O  | -1.058138000 | -0.514717000 | 1.737683000  |
| O  | -1.772558000 | -2.443003000 | 0.771728000  |
| H  | -0.767631000 | -1.961843000 | 3.851144000  |
| H  | -1.952181000 | -3.151907000 | 3.231475000  |
| H  | -0.249814000 | -3.289871000 | 2.773337000  |
| C  | -3.143875000 | -0.041067000 | -1.817993000 |
| C  | -0.763352000 | -0.108312000 | -1.842910000 |
| C  | -3.059605000 | -0.800633000 | -0.496525000 |
| C  | -1.937619000 | -1.834595000 | -0.535080000 |
| C  | -0.679162000 | -1.241354000 | -1.130077000 |
| O  | -1.893412000 | 0.607053000  | -2.095065000 |
| C  | -4.222655000 | 1.026140000  | -1.799217000 |
| H  | 0.090954000  | 0.370248000  | -2.300788000 |
| H  | -2.267321000 | -2.686728000 | -1.139420000 |
| H  | -3.366492000 | -0.739892000 | -2.636609000 |

|   |              |              |              |
|---|--------------|--------------|--------------|
| H | -5.194541000 | 0.536494000  | -1.731640000 |
| H | -4.182946000 | 1.617024000  | -2.718848000 |
| I | 4.782061000  | 1.242600000  | 0.874043000  |
| C | 3.061483000  | -2.197051000 | -1.555676000 |
| C | 0.598569000  | -2.044996000 | -1.059539000 |
| C | 2.896483000  | -3.459607000 | -0.706159000 |
| C | 2.016633000  | -3.211525000 | 0.526354000  |
| H | 0.370804000  | -3.035339000 | -1.502381000 |
| H | 2.622321000  | -2.811234000 | 1.346348000  |
| H | 3.813187000  | -1.491829000 | -0.933599000 |
| H | 3.864845000  | -3.855935000 | -0.388658000 |
| H | 1.571387000  | -4.159161000 | 0.860398000  |
| H | 2.434724000  | -4.212345000 | -1.354933000 |
| H | 3.665377000  | -2.351993000 | -2.452634000 |
| H | 0.779001000  | 1.061203000  | 1.219812000  |
| N | -0.354700000 | 2.522693000  | 0.353153000  |
| C | -1.182657000 | 2.667360000  | 1.549410000  |
| H | -0.984121000 | 3.636242000  | 2.021988000  |
| H | -2.238939000 | 2.624663000  | 1.270893000  |
| H | -0.962757000 | 1.863431000  | 2.250815000  |
| C | -0.689551000 | 3.380691000  | -0.779523000 |
| H | -0.005396000 | 3.185179000  | -1.603482000 |
| H | -1.714088000 | 3.166908000  | -1.093324000 |
| H | -0.611109000 | 4.431387000  | -0.480903000 |
| C | 1.793492000  | -1.471281000 | -1.803114000 |
| H | 1.608243000  | -1.149329000 | -2.827691000 |
| O | 0.977027000  | -2.240215000 | 0.313987000  |
| O | -4.317302000 | -1.480143000 | -0.317773000 |
| H | -2.891112000 | -0.101007000 | 0.318515000  |
| C | -4.935357000 | -1.373153000 | 0.889518000  |
| C | -6.219224000 | -2.155247000 | 0.886996000  |
| H | -6.781414000 | -1.943913000 | 1.796625000  |
| H | -6.817621000 | -1.909582000 | 0.005360000  |
| H | -5.987999000 | -3.225025000 | 0.841426000  |
| O | -4.492683000 | -0.740973000 | 1.825031000  |

### EIII<sub>1a</sub>

|    |              |              |              |
|----|--------------|--------------|--------------|
| Pd | 2.610222000  | 0.560549000  | 0.337115000  |
| O  | 1.424416000  | -0.999824000 | 1.150957000  |
| C  | 1.023574000  | -1.948798000 | 0.426105000  |
| C  | -4.273966000 | -2.917041000 | -2.894762000 |
| C  | -4.985366000 | -1.753498000 | -2.247832000 |
| O  | -5.716991000 | -0.995474000 | -2.847206000 |
| O  | -4.850161000 | -1.563602000 | -0.905681000 |
| H  | -4.540928000 | -2.931470000 | -3.951266000 |
| H  | -3.190880000 | -2.821999000 | -2.792751000 |
| H  | -4.577773000 | -3.862235000 | -2.432567000 |
| C  | -2.851189000 | 4.338736000  | 0.881713000  |
| C  | -2.594899000 | 3.027464000  | 0.192917000  |
| O  | -2.977574000 | 2.719236000  | -0.916077000 |
| O  | -1.855505000 | 2.216630000  | 0.994920000  |
| H  | -1.913373000 | 4.769827000  | 1.243717000  |
| H  | -3.340930000 | 5.028278000  | 0.193961000  |
| H  | -3.495665000 | 4.161017000  | 1.748102000  |
| C  | -2.596219000 | -1.365680000 | -0.011370000 |
| C  | -1.078175000 | -0.304825000 | -1.529623000 |
| C  | -2.883070000 | 0.032384000  | 0.541119000  |
| C  | -1.592812000 | 0.847918000  | 0.586121000  |
| C  | -0.829879000 | 0.720583000  | -0.708748000 |
| O  | -2.010831000 | -1.285793000 | -1.320075000 |

|   |              |              |              |
|---|--------------|--------------|--------------|
| C | -3.842647000 | -2.227876000 | -0.126255000 |
| H | -0.554047000 | -0.452235000 | -2.465047000 |
| H | -0.979899000 | 0.475171000  | 1.413434000  |
| H | -1.892905000 | -1.871879000 | 0.658597000  |
| H | -4.270801000 | -2.372020000 | 0.867677000  |
| H | -3.582356000 | -3.207144000 | -0.532094000 |
| I | 4.983748000  | -0.981752000 | 0.136547000  |
| C | 1.915119000  | 2.284101000  | -2.687585000 |
| C | 0.220728000  | 1.760769000  | -1.021537000 |
| C | 2.321552000  | 3.359151000  | -1.678704000 |
| C | 2.389023000  | 2.801069000  | -0.255454000 |
| C | 1.195628000  | 2.008564000  | 0.122443000  |
| O | 0.913741000  | 1.367722000  | -2.202292000 |
| H | -0.303198000 | 2.718270000  | -1.205377000 |
| H | 2.691823000  | 3.537585000  | 0.491670000  |
| H | 1.550868000  | 2.755691000  | -3.609676000 |
| H | 1.582093000  | 4.168073000  | -1.665298000 |
| H | 3.346697000  | 2.075512000  | -0.253322000 |
| H | 3.276851000  | 3.794492000  | -1.984105000 |
| H | 2.784218000  | 1.666127000  | -2.941062000 |
| H | 0.730039000  | 2.236071000  | 1.081128000  |
| H | 1.242333000  | -1.986131000 | -0.644192000 |
| N | 0.311242000  | -2.970125000 | 0.891953000  |
| C | -0.030034000 | -3.090363000 | 2.307348000  |
| H | 0.206487000  | -2.160809000 | 2.822870000  |
| H | -1.098917000 | -3.302099000 | 2.405555000  |
| H | 0.535570000  | -3.913577000 | 2.756090000  |
| C | -0.109208000 | -4.060011000 | 0.015697000  |
| H | 0.199533000  | -3.854453000 | -1.010333000 |
| H | 0.343540000  | -4.999507000 | 0.347910000  |
| H | -1.198474000 | -4.161259000 | 0.049605000  |
| H | -3.634240000 | 0.534849000  | -0.065391000 |
| O | -3.371161000 | -0.158049000 | 1.883579000  |
| C | -4.333883000 | 0.686873000  | 2.340199000  |
| C | -4.711921000 | 0.331530000  | 3.750757000  |
| H | -5.473334000 | 1.021953000  | 4.113315000  |
| H | -5.091121000 | -0.694629000 | 3.787030000  |
| H | -3.828481000 | 0.379399000  | 4.394966000  |
| O | -4.808989000 | 1.589317000  | 1.683575000  |

### EIV<sub>1a</sub>

|    |              |              |              |
|----|--------------|--------------|--------------|
| Pd | 2.712053000  | 0.333664000  | -0.439841000 |
| O  | 1.694464000  | -1.308246000 | 0.432289000  |
| C  | 1.242464000  | -2.313031000 | -0.174747000 |
| C  | -3.468717000 | -3.776672000 | -1.889154000 |
| C  | -4.496229000 | -2.718695000 | -1.566706000 |
| O  | -5.345580000 | -2.347142000 | -2.347621000 |
| O  | -4.512653000 | -2.173725000 | -0.318861000 |
| H  | -3.653429000 | -4.127649000 | -2.904296000 |
| H  | -2.456804000 | -3.372305000 | -1.819006000 |
| H  | -3.547221000 | -4.620304000 | -1.195665000 |
| C  | -3.838488000 | 4.221178000  | -0.623393000 |
| C  | -3.191595000 | 2.867326000  | -0.736087000 |
| O  | -3.219902000 | 2.150864000  | -1.716442000 |
| O  | -2.571166000 | 2.550790000  | 0.423975000  |
| H  | -3.127104000 | 4.957210000  | -0.238661000 |
| H  | -4.215417000 | 4.533461000  | -1.597595000 |
| H  | -4.668021000 | 4.152836000  | 0.087761000  |
| C  | -2.443183000 | -1.224169000 | 0.544681000  |
| C  | -0.895066000 | -0.312230000 | -0.995391000 |

|   |              |              |              |
|---|--------------|--------------|--------------|
| C | -3.081686000 | 0.162859000  | 0.616704000  |
| C | -1.989025000 | 1.231320000  | 0.593798000  |
| C | -0.915689000 | 0.891336000  | -0.414222000 |
| O | -1.750780000 | -1.339785000 | -0.709761000 |
| C | -3.446749000 | -2.360332000 | 0.626506000  |
| H | -0.188660000 | -0.599704000 | -1.763734000 |
| H | -1.551418000 | 1.302458000  | 1.592634000  |
| H | -1.716180000 | -1.346903000 | 1.358979000  |
| H | -3.912593000 | -2.351175000 | 1.613483000  |
| H | -2.938542000 | -3.317334000 | 0.495073000  |
| I | 5.238181000  | -0.545126000 | 0.585349000  |
| C | 2.530254000  | 2.401113000  | -1.400413000 |
| C | 0.079819000  | 1.970960000  | -0.756578000 |
| C | 2.524218000  | 3.563636000  | -0.379410000 |
| C | 1.109431000  | 3.892603000  | 0.096264000  |
| H | -0.417395000 | 2.671122000  | -1.458062000 |
| H | 0.556142000  | 4.448261000  | -0.677284000 |
| H | 2.876184000  | 2.682434000  | -2.400425000 |
| H | 2.979605000  | 4.451494000  | -0.828872000 |
| H | 1.139699000  | 4.508135000  | 0.999004000  |
| H | 3.132785000  | 3.291774000  | 0.487122000  |
| H | 3.497333000  | 1.732883000  | -1.143846000 |
| H | 1.345190000  | -2.419827000 | -1.258641000 |
| N | 0.612019000  | -3.313313000 | 0.430956000  |
| C | 0.387312000  | -3.328239000 | 1.873194000  |
| H | -0.682538000 | -3.443894000 | 2.072678000  |
| H | 0.922795000  | -4.171242000 | 2.321936000  |
| H | 0.742908000  | -2.396681000 | 2.310275000  |
| C | 0.088045000  | -4.446234000 | -0.324393000 |
| H | 0.300924000  | -4.322490000 | -1.387633000 |
| H | 0.550420000  | -5.373853000 | 0.027691000  |
| H | -0.994660000 | -4.513982000 | -0.182160000 |
| C | 1.347088000  | 1.505521000  | -1.449505000 |
| H | 1.160510000  | 1.049392000  | -2.423948000 |
| O | 0.389142000  | 2.703722000  | 0.429807000  |
| H | -3.760723000 | 0.289678000  | -0.224625000 |
| O | -3.810675000 | 0.248669000  | 1.854971000  |
| C | -4.980426000 | 0.942028000  | 1.851970000  |
| C | -5.602373000 | 0.918113000  | 3.220227000  |
| H | -6.528494000 | 1.492746000  | 3.215284000  |
| H | -5.808477000 | -0.115669000 | 3.515293000  |
| H | -4.906016000 | 1.338227000  | 3.952560000  |
| O | -5.441521000 | 1.489460000  | 0.872528000  |

### TS3I<sub>1a</sub>

|    |              |              |              |
|----|--------------|--------------|--------------|
| Pd | -2.853295000 | 0.288039000  | 0.296555000  |
| O  | -1.449496000 | -1.369416000 | 0.427813000  |
| C  | -0.466162000 | -1.408681000 | 1.212717000  |
| C  | 6.193659000  | -2.346085000 | -0.855638000 |
| C  | 4.878435000  | -2.536299000 | -0.142681000 |
| O  | 4.775999000  | -3.051416000 | 0.951199000  |
| O  | 3.733942000  | -2.126900000 | -0.749977000 |
| H  | 6.968483000  | -2.846479000 | -0.275442000 |
| H  | 6.164867000  | -2.761198000 | -1.867234000 |
| H  | 6.445283000  | -1.282737000 | -0.932408000 |
| C  | 2.301061000  | 2.984075000  | 2.790491000  |
| C  | 1.900541000  | 2.028567000  | 1.701956000  |
| O  | 1.432226000  | 0.919712000  | 1.877124000  |
| O  | 2.135970000  | 2.567186000  | 0.485516000  |
| H  | 1.924546000  | 2.629610000  | 3.750234000  |

|   |              |              |              |
|---|--------------|--------------|--------------|
| H | 3.394716000  | 3.031733000  | 2.824624000  |
| H | 1.927392000  | 3.989822000  | 2.581284000  |
| C | 2.724412000  | -0.293711000 | -1.934863000 |
| C | 0.412078000  | 0.040651000  | -1.522735000 |
| C | 2.981088000  | 0.607396000  | -0.726421000 |
| C | 1.987298000  | 1.762771000  | -0.722187000 |
| C | 0.591902000  | 1.254798000  | -0.986244000 |
| O | 1.396885000  | -0.838449000 | -1.862144000 |
| C | 3.710028000  | -1.444115000 | -2.018472000 |
| H | -0.568924000 | -0.360717000 | -1.741800000 |
| H | 2.279745000  | 2.481684000  | -1.494537000 |
| H | 2.808714000  | 0.291843000  | -2.861263000 |
| H | 4.686672000  | -1.041944000 | -2.286280000 |
| H | 3.392470000  | -2.151624000 | -2.789643000 |
| I | -4.963705000 | -1.455824000 | -0.071818000 |
| C | -2.603488000 | 2.985554000  | -1.850860000 |
| C | -0.578944000 | 2.177619000  | -0.735048000 |
| C | -2.956605000 | 3.522129000  | -0.460692000 |
| C | -2.620802000 | 2.537456000  | 0.634182000  |
| C | -1.392616000 | 1.863047000  | 0.516307000  |
| O | -1.411718000 | 2.176915000  | -1.901762000 |
| H | -0.168728000 | 3.191847000  | -0.576068000 |
| H | -3.905331000 | 1.408166000  | 0.219789000  |
| H | -3.419231000 | 2.344958000  | -2.205772000 |
| H | -4.008773000 | 3.817737000  | -0.443183000 |
| H | -3.041271000 | 2.722255000  | 1.619997000  |
| H | -2.363872000 | 4.421359000  | -0.240710000 |
| H | -0.841268000 | 1.574772000  | 1.406183000  |
| H | -2.493990000 | 3.821252000  | -2.554247000 |
| H | -0.360014000 | -0.693893000 | 2.031274000  |
| N | 0.514725000  | -2.299977000 | 1.125232000  |
| C | 0.540133000  | -3.325887000 | 0.087542000  |
| H | 1.501881000  | -3.284837000 | -0.427679000 |
| H | 0.412143000  | -4.315237000 | 0.540987000  |
| H | -0.264901000 | -3.145958000 | -0.622613000 |
| C | 1.574319000  | -2.353651000 | 2.130552000  |
| H | 1.422521000  | -3.216954000 | 2.789191000  |
| H | 2.543390000  | -2.457134000 | 1.636373000  |
| H | 1.570379000  | -1.437915000 | 2.722292000  |
| H | 2.887740000  | 0.024269000  | 0.187635000  |
| O | 4.319451000  | 1.122257000  | -0.855823000 |
| C | 5.093878000  | 1.172229000  | 0.261026000  |
| C | 6.445044000  | 1.744654000  | -0.063267000 |
| H | 7.121274000  | 1.588070000  | 0.777177000  |
| H | 6.851943000  | 1.291413000  | -0.970895000 |
| H | 6.340263000  | 2.819522000  | -0.248700000 |
| O | 4.719888000  | 0.815099000  | 1.358759000  |

### TS3II<sub>1a</sub>

|    |              |              |              |
|----|--------------|--------------|--------------|
| Pd | -2.958016000 | 0.170084000  | -0.704080000 |
| C  | -0.710961000 | -1.598453000 | 0.265030000  |
| O  | -1.459317000 | -1.403715000 | -0.728920000 |
| C  | 6.332058000  | -2.139217000 | -0.236847000 |
| C  | 4.881705000  | -2.428519000 | 0.059601000  |
| O  | 4.510964000  | -3.150134000 | 0.961944000  |
| O  | 3.927245000  | -1.874938000 | -0.731536000 |
| H  | 6.943643000  | -2.762641000 | 0.415029000  |
| H  | 6.576659000  | -2.350116000 | -1.282264000 |
| H  | 6.566551000  | -1.088528000 | -0.039371000 |
| C  | 0.987657000  | 2.513203000  | 3.061352000  |

|   |              |              |              |
|---|--------------|--------------|--------------|
| C | 1.273065000  | 1.674553000  | 1.846429000  |
| O | 1.098563000  | 0.475159000  | 1.765076000  |
| O | 1.764970000  | 2.446318000  | 0.850265000  |
| H | 0.758056000  | 1.868484000  | 3.910203000  |
| H | 1.839861000  | 3.157087000  | 3.296213000  |
| H | 0.129120000  | 3.157936000  | 2.847571000  |
| C | 3.161603000  | 0.124495000  | -1.806331000 |
| C | 0.779453000  | 0.206391000  | -1.850295000 |
| C | 3.072307000  | 0.848667000  | -0.464126000 |
| C | 1.950217000  | 1.882606000  | -0.475010000 |
| C | 0.695162000  | 1.313043000  | -1.097967000 |
| O | 1.908449000  | -0.499246000 | -2.125510000 |
| C | 4.223233000  | -0.960417000 | -1.803889000 |
| H | -0.075136000 | -0.256849000 | -2.322550000 |
| H | 2.283878000  | 2.756762000  | -1.044692000 |
| H | 3.407318000  | 0.844944000  | -2.599084000 |
| H | 5.201436000  | -0.491543000 | -1.691301000 |
| H | 4.199884000  | -1.509085000 | -2.749949000 |
| I | -4.648024000 | -1.379341000 | 0.827302000  |
| C | -2.980787000 | 2.292278000  | -1.532662000 |
| C | -0.577212000 | 2.115396000  | -0.986298000 |
| C | -2.960962000 | 3.426343000  | -0.531648000 |
| C | -1.997897000 | 3.182100000  | 0.648880000  |
| H | -0.336339000 | 3.142499000  | -1.325405000 |
| H | -2.550263000 | 2.803352000  | 1.513327000  |
| H | -4.092466000 | 1.200537000  | -0.696471000 |
| H | -3.963134000 | 3.650971000  | -0.158105000 |
| H | -1.518063000 | 4.128439000  | 0.935525000  |
| H | -2.631403000 | 4.303789000  | -1.104363000 |
| H | -3.734767000 | 2.349962000  | -2.314084000 |
| H | -0.845083000 | -1.047330000 | 1.198295000  |
| N | 0.292775000  | -2.469008000 | 0.273078000  |
| C | 1.070286000  | -2.712995000 | 1.485691000  |
| H | 0.818347000  | -3.697847000 | 1.896477000  |
| H | 2.137435000  | -2.696184000 | 1.247295000  |
| H | 0.855684000  | -1.940948000 | 2.224046000  |
| C | 0.636987000  | -3.271991000 | -0.895966000 |
| H | -0.023648000 | -3.016131000 | -1.722712000 |
| H | 1.673062000  | -3.066934000 | -1.175805000 |
| H | 0.527059000  | -4.335610000 | -0.657917000 |
| C | -1.767488000 | 1.637680000  | -1.805774000 |
| H | -1.599728000 | 1.223605000  | -2.796387000 |
| O | -0.992726000 | 2.191302000  | 0.389530000  |
| O | 4.320265000  | 1.540921000  | -0.260080000 |
| H | 2.908589000  | 0.127155000  | 0.331975000  |
| C | 5.054730000  | 1.229602000  | 0.840630000  |
| C | 6.301297000  | 2.067814000  | 0.889424000  |
| H | 6.875023000  | 1.824399000  | 1.783486000  |
| H | 6.906157000  | 1.878905000  | -0.003173000 |
| H | 6.038339000  | 3.129993000  | 0.890160000  |
| O | 4.739309000  | 0.381798000  | 1.649455000  |

### TS3III<sub>1a</sub>

|    |              |              |              |
|----|--------------|--------------|--------------|
| Pd | 2.728167000  | 0.638838000  | 0.254908000  |
| O  | 1.429806000  | -0.892974000 | 1.112371000  |
| C  | 1.046971000  | -1.864829000 | 0.415762000  |
| C  | -4.336790000 | -2.878414000 | -2.918031000 |
| C  | -5.040406000 | -1.733522000 | -2.230723000 |
| O  | -5.794014000 | -0.971255000 | -2.796578000 |
| O  | -4.871438000 | -1.566262000 | -0.889595000 |

|   |              |              |              |
|---|--------------|--------------|--------------|
| H | -4.631750000 | -2.874412000 | -3.967198000 |
| H | -3.252099000 | -2.776156000 | -2.842243000 |
| H | -4.621094000 | -3.834992000 | -2.466973000 |
| C | -2.838535000 | 4.313874000  | 0.960286000  |
| C | -2.595856000 | 3.015040000  | 0.243859000  |
| O | -2.996651000 | 2.727304000  | -0.864240000 |
| O | -1.845862000 | 2.188358000  | 1.019363000  |
| H | -1.896420000 | 4.728367000  | 1.330186000  |
| H | -3.323514000 | 5.022407000  | 0.288636000  |
| H | -3.483575000 | 4.123530000  | 1.823717000  |
| C | -2.599781000 | -1.374635000 | -0.039772000 |
| C | -1.107199000 | -0.286497000 | -1.562488000 |
| C | -2.882064000 | 0.013423000  | 0.539009000  |
| C | -1.590992000 | 0.827163000  | 0.581343000  |
| C | -0.846393000 | 0.723463000  | -0.726359000 |
| O | -2.035248000 | -1.272156000 | -1.356324000 |
| C | -3.843697000 | -2.240682000 | -0.146106000 |
| H | -0.597303000 | -0.416318000 | -2.508492000 |
| H | -0.965824000 | 0.437109000  | 1.391584000  |
| H | -1.883636000 | -1.886717000 | 0.611336000  |
| H | -4.249710000 | -2.406872000 | 0.853580000  |
| H | -3.587092000 | -3.210099000 | -0.577022000 |
| I | 4.883668000  | -1.076439000 | 0.171599000  |
| C | 1.920989000  | 2.278406000  | -2.680651000 |
| C | 0.191973000  | 1.774339000  | -1.042202000 |
| C | 2.381055000  | 3.321612000  | -1.653895000 |
| C | 2.287922000  | 2.824867000  | -0.228991000 |
| C | 1.145850000  | 2.074549000  | 0.108136000  |
| O | 0.913153000  | 1.368786000  | -2.201795000 |
| H | -0.340277000 | 2.720159000  | -1.258837000 |
| H | 2.771709000  | 3.428421000  | 0.535245000  |
| H | 1.550435000  | 2.784304000  | -3.581718000 |
| H | 1.724740000  | 4.201991000  | -1.693672000 |
| H | 3.652307000  | 1.750381000  | -0.280419000 |
| H | 3.388838000  | 3.660679000  | -1.906326000 |
| H | 2.768736000  | 1.647062000  | -2.966547000 |
| H | 0.733112000  | 2.144618000  | 1.110915000  |
| H | 1.267370000  | -1.925238000 | -0.654294000 |
| N | 0.349663000  | -2.891837000 | 0.899547000  |
| C | 0.008963000  | -2.991553000 | 2.315696000  |
| H | 0.285062000  | -2.069118000 | 2.824088000  |
| H | -1.066858000 | -3.161071000 | 2.423276000  |
| H | 0.544535000  | -3.833644000 | 2.766495000  |
| C | -0.052514000 | -4.003602000 | 0.043335000  |
| H | 0.249209000  | -3.809155000 | -0.987121000 |
| H | 0.418116000  | -4.929670000 | 0.388673000  |
| H | -1.139743000 | -4.126060000 | 0.080266000  |
| H | -3.640943000 | 0.525557000  | -0.049481000 |
| O | -3.352960000 | -0.199948000 | 1.884146000  |
| C | -4.312045000 | 0.634798000  | 2.366240000  |
| C | -4.670609000 | 0.255194000  | 3.775547000  |
| H | -5.445856000 | 0.922551000  | 4.151654000  |
| H | -5.022523000 | -0.780687000 | 3.804809000  |
| H | -3.783091000 | 0.320181000  | 4.412769000  |
| O | -4.796990000 | 1.547211000  | 1.730873000  |

### TS3IV<sub>1a</sub>

|    |              |              |             |
|----|--------------|--------------|-------------|
| Pd | -2.645110000 | 0.049891000  | 0.501758000 |
| O  | -1.330204000 | -1.648315000 | 0.048328000 |
| C  | -0.757344000 | -2.332007000 | 0.931469000 |

|   |              |              |              |
|---|--------------|--------------|--------------|
| C | 4.527959000  | -3.062230000 | 1.459002000  |
| C | 5.090849000  | -1.988483000 | 0.559210000  |
| O | 6.102585000  | -1.365871000 | 0.813831000  |
| O | 4.482806000  | -1.739979000 | -0.628052000 |
| H | 5.199594000  | -3.179748000 | 2.309153000  |
| H | 3.531811000  | -2.790056000 | 1.813991000  |
| H | 4.451831000  | -4.014235000 | 0.923697000  |
| C | 2.079479000  | 4.631368000  | -1.220637000 |
| C | 1.925223000  | 3.370440000  | -0.406695000 |
| O | 2.319845000  | 3.227743000  | 0.730239000  |
| O | 1.282053000  | 2.438597000  | -1.146773000 |
| H | 1.096266000  | 4.998638000  | -1.530680000 |
| H | 2.589192000  | 5.391392000  | -0.627922000 |
| H | 2.655309000  | 4.420319000  | -2.127406000 |
| C | 2.091202000  | -1.160828000 | -0.494058000 |
| C | 1.318156000  | -0.094527000 | 1.475027000  |
| C | 2.214331000  | 0.223478000  | -1.115226000 |
| C | 1.028241000  | 1.097001000  | -0.665868000 |
| C | 0.752647000  | 0.919227000  | 0.808947000  |
| O | 2.120045000  | -1.068020000 | 0.940270000  |
| C | 3.144101000  | -2.174660000 | -0.915992000 |
| H | 1.161460000  | -0.261315000 | 2.536727000  |
| H | 0.145069000  | 0.796886000  | -1.239499000 |
| H | 1.118507000  | -1.564638000 | -0.803429000 |
| H | 3.097289000  | -2.297373000 | -2.000333000 |
| H | 2.927896000  | -3.139674000 | -0.452625000 |
| I | -4.431975000 | -0.805292000 | -1.429718000 |
| C | -2.727196000 | 1.674496000  | 2.118302000  |
| C | -0.260036000 | 1.787655000  | 1.540298000  |
| C | -2.866462000 | 3.155894000  | 1.760206000  |
| C | -1.503547000 | 3.773667000  | 1.428493000  |
| H | 0.237014000  | 2.208273000  | 2.432725000  |
| H | -0.985153000 | 4.076397000  | 2.351074000  |
| H | -3.451892000 | 1.291701000  | 2.833788000  |
| H | -3.300534000 | 3.667990000  | 2.626397000  |
| H | -1.617684000 | 4.658266000  | 0.797333000  |
| H | -3.562146000 | 3.296482000  | 0.929781000  |
| H | -3.685271000 | 1.125668000  | 0.829169000  |
| H | 2.231143000  | 0.153640000  | -2.203867000 |
| O | 3.422559000  | 0.839332000  | -0.650027000 |
| C | 4.386573000  | 1.140157000  | -1.553739000 |
| C | 5.604157000  | 1.657512000  | -0.842902000 |
| H | 6.305749000  | 2.083675000  | -1.560656000 |
| H | 5.318550000  | 2.402645000  | -0.095573000 |
| H | 6.068951000  | 0.813980000  | -0.319163000 |
| O | 4.270192000  | 0.985949000  | -2.752374000 |
| H | -0.722664000 | -2.003870000 | 1.974843000  |
| N | -0.145037000 | -3.489857000 | 0.691833000  |
| C | -0.140064000 | -4.103678000 | -0.632784000 |
| H | 0.881324000  | -4.144055000 | -1.024215000 |
| H | -0.528990000 | -5.124083000 | -0.560461000 |
| H | -0.765802000 | -3.521565000 | -1.307478000 |
| C | 0.597358000  | -4.182780000 | 1.739225000  |
| H | 0.538375000  | -3.622746000 | 2.674275000  |
| H | 0.183738000  | -5.184668000 | 1.891846000  |
| H | 1.648122000  | -4.274513000 | 1.446914000  |
| C | -1.479680000 | 1.019103000  | 2.044799000  |
| H | -1.275104000 | 0.205432000  | 2.738985000  |
| O | -0.677708000 | 2.860665000  | 0.705992000  |

**FI<sub>1a</sub>**

|    |              |              |              |
|----|--------------|--------------|--------------|
| Pd | -2.633343000 | 0.316351000  | 0.205242000  |
| O  | -2.071659000 | -0.306164000 | 2.294850000  |
| C  | -1.039378000 | -0.731650000 | 2.866698000  |
| C  | 5.127461000  | -3.115832000 | -0.746434000 |
| C  | 3.723718000  | -2.960650000 | -0.215138000 |
| O  | 3.355468000  | -3.395790000 | 0.855631000  |
| O  | 2.799748000  | -2.319427000 | -0.976927000 |
| H  | 5.672355000  | -3.778934000 | -0.074811000 |
| H  | 5.128545000  | -3.533323000 | -1.757518000 |
| H  | 5.645795000  | -2.151529000 | -0.780989000 |
| C  | 2.604177000  | 2.859154000  | 2.633066000  |
| C  | 2.020912000  | 2.013734000  | 1.536215000  |
| O  | 1.402403000  | 0.980010000  | 1.698092000  |
| O  | 2.285425000  | 2.557102000  | 0.324759000  |
| H  | 2.227916000  | 2.519719000  | 3.598405000  |
| H  | 3.694070000  | 2.755297000  | 2.609659000  |
| H  | 2.364493000  | 3.914785000  | 2.479894000  |
| C  | 2.388713000  | -0.294645000 | -2.189869000 |
| C  | 0.146035000  | 0.414233000  | -1.753349000 |
| C  | 2.777303000  | 0.535606000  | -0.964741000 |
| C  | 1.970244000  | 1.827299000  | -0.895760000 |
| C  | 0.505918000  | 1.536709000  | -1.116051000 |
| O  | 0.975550000  | -0.559524000 | -2.215207000 |
| C  | 3.104514000  | -1.636239000 | -2.207016000 |
| H  | -0.890001000 | 0.174933000  | -1.963120000 |
| H  | 2.339565000  | 2.517239000  | -1.661591000 |
| H  | 2.657221000  | 0.251929000  | -3.104108000 |
| H  | 4.173798000  | -1.463595000 | -2.332691000 |
| H  | 2.742217000  | -2.242958000 | -3.041691000 |
| I  | -3.815926000 | -2.000625000 | -0.569304000 |
| C  | -2.326701000 | 3.904787000  | -1.375491000 |
| C  | -0.528104000 | 2.548776000  | -0.669923000 |
| C  | -3.338253000 | 3.402329000  | -0.334481000 |
| C  | -2.665720000 | 2.499696000  | 0.682780000  |
| C  | -1.344449000 | 2.105594000  | 0.533375000  |
| O  | -1.381184000 | 2.899258000  | -1.761520000 |
| H  | 0.016716000  | 3.452983000  | -0.342870000 |
| H  | -2.988374000 | 0.769206000  | -1.183539000 |
| H  | -2.829953000 | 4.219127000  | -2.293057000 |
| H  | -4.179646000 | 2.891671000  | -0.811887000 |
| H  | -3.137964000 | 2.419520000  | 1.660484000  |
| H  | -3.760181000 | 4.264441000  | 0.196820000  |
| H  | -0.775038000 | 1.758258000  | 1.388018000  |
| H  | -1.782158000 | 4.773184000  | -0.972436000 |
| H  | -0.882691000 | -0.487569000 | 3.925407000  |
| N  | -0.079447000 | -1.487711000 | 2.343378000  |
| C  | -0.093886000 | -1.932361000 | 0.953055000  |
| H  | 0.931040000  | -2.075655000 | 0.610826000  |
| H  | -0.638792000 | -2.878488000 | 0.861351000  |
| H  | -0.581737000 | -1.190686000 | 0.321746000  |
| C  | 1.093136000  | -1.852779000 | 3.132309000  |
| H  | 1.234586000  | -2.936980000 | 3.110731000  |
| H  | 1.979815000  | -1.368433000 | 2.715297000  |
| H  | 0.962238000  | -1.529822000 | 4.167177000  |
| H  | 2.620377000  | -0.045199000 | -0.058383000 |
| O  | 4.174197000  | 0.855260000  | -1.114230000 |
| C  | 4.971934000  | 0.756491000  | -0.017554000 |
| C  | 6.381856000  | 1.147686000  | -0.359435000 |
| H  | 7.040478000  | 0.920896000  | 0.478912000  |
| H  | 6.717050000  | 0.624944000  | -1.259349000 |
| H  | 6.415041000  | 2.222262000  | -0.569582000 |
| O  | 4.577627000  | 0.409284000  | 1.076767000  |

**FIII<sub>1a</sub>**

|    |              |              |              |
|----|--------------|--------------|--------------|
| Pd | -2.492798000 | -0.408595000 | 0.135697000  |
| O  | -2.258196000 | 1.762885000  | 0.727602000  |
| C  | -1.958946000 | 2.698355000  | -0.053793000 |
| C  | 4.405897000  | -3.011873000 | -2.611043000 |
| C  | 4.927205000  | -1.911350000 | -1.719827000 |
| O  | 5.895984000  | -2.029875000 | -1.001015000 |
| O  | 4.317762000  | -0.693857000 | -1.752125000 |
| H  | 5.045114000  | -3.884697000 | -2.479627000 |
| H  | 3.375948000  | -3.270347000 | -2.355900000 |
| H  | 4.428040000  | -2.702856000 | -3.661389000 |
| C  | 2.313760000  | 1.203184000  | 4.117707000  |
| C  | 2.165066000  | 0.280139000  | 2.941021000  |
| O  | 2.816040000  | -0.721050000 | 2.731570000  |
| O  | 1.179258000  | 0.728424000  | 2.118925000  |
| H  | 2.687243000  | 2.167319000  | 3.759103000  |
| H  | 1.344883000  | 1.375310000  | 4.595154000  |
| H  | 3.017119000  | 0.779390000  | 4.834741000  |
| C  | 1.917427000  | -0.608469000 | -1.350772000 |
| C  | 0.995694000  | -2.274484000 | 0.073736000  |
| C  | 2.142519000  | 0.246045000  | -0.099716000 |
| C  | 0.956366000  | 0.072982000  | 0.843067000  |
| C  | 0.550420000  | -1.376993000 | 0.958957000  |
| O  | 1.824685000  | -1.993274000 | -0.978193000 |
| C  | 3.037606000  | -0.479224000 | -2.369692000 |
| H  | 0.728738000  | -3.323546000 | 0.105428000  |
| H  | 0.125237000  | 0.656709000  | 0.438173000  |
| H  | 0.975630000  | -0.310278000 | -1.833800000 |
| H  | 3.054515000  | 0.542866000  | -2.751794000 |
| H  | 2.861184000  | -1.156189000 | -3.207562000 |
| I  | -2.636673000 | -0.069666000 | -2.542588000 |
| C  | -1.971806000 | -3.423667000 | 2.712090000  |
| C  | -0.436416000 | -1.749730000 | 2.046782000  |
| C  | -3.242699000 | -2.626724000 | 2.403177000  |
| C  | -2.896322000 | -1.157785000 | 2.237571000  |
| C  | -1.577822000 | -0.751959000 | 2.122758000  |
| O  | -0.901734000 | -3.073161000 | 1.827359000  |
| H  | 0.077786000  | -1.707456000 | 3.026512000  |
| H  | -3.648203000 | -0.428534000 | 2.533446000  |
| H  | -1.661025000 | -3.244488000 | 3.753071000  |
| H  | -3.943580000 | -2.727029000 | 3.240452000  |
| H  | -2.471364000 | -1.869750000 | -0.216470000 |
| H  | -3.747855000 | -3.025611000 | 1.519117000  |
| H  | -2.133579000 | -4.496606000 | 2.584705000  |
| H  | -1.301918000 | 0.267417000  | 2.372315000  |
| H  | -2.399975000 | 2.767349000  | -1.054913000 |
| N  | -1.094652000 | 3.666657000  | 0.241284000  |
| C  | -0.381497000 | 3.696125000  | 1.514689000  |
| H  | -0.430895000 | 2.718135000  | 1.988946000  |
| H  | 0.664994000  | 3.953876000  | 1.331733000  |
| H  | -0.820436000 | 4.450025000  | 2.177981000  |
| C  | -0.903482000 | 4.804837000  | -0.652178000 |
| H  | -1.460303000 | 4.649005000  | -1.578064000 |
| H  | -1.258869000 | 5.722248000  | -0.170564000 |
| H  | 0.158443000  | 4.920038000  | -0.886087000 |
| H  | 3.076017000  | -0.035835000 | 0.384459000  |
| O  | 2.207028000  | 1.616152000  | -0.544399000 |
| C  | 3.015022000  | 2.469430000  | 0.136763000  |
| C  | 3.046778000  | 3.823272000  | -0.517944000 |

|   |             |             |              |
|---|-------------|-------------|--------------|
| H | 3.988369000 | 3.911630000 | -1.071858000 |
| H | 2.218178000 | 3.961137000 | -1.212389000 |
| H | 3.036594000 | 4.598544000 | 0.250970000  |
| O | 3.651711000 | 2.157582000 | 1.121539000  |

### GI<sub>1a</sub>

|    |              |              |              |
|----|--------------|--------------|--------------|
| Pd | 2.717276000  | -0.276044000 | -0.006298000 |
| O  | 2.478481000  | 0.180537000  | 2.182453000  |
| C  | 1.538923000  | 0.587520000  | 2.905661000  |
| C  | -1.450073000 | 4.051015000  | -1.434667000 |
| C  | -2.367295000 | 3.461644000  | -0.392951000 |
| O  | -2.369857000 | 3.802542000  | 0.771905000  |
| O  | -3.278738000 | 2.524423000  | -0.767410000 |
| H  | -0.843167000 | 4.819262000  | -0.956291000 |
| H  | -0.802731000 | 3.283188000  | -1.864592000 |
| H  | -2.025970000 | 4.502214000  | -2.249327000 |
| C  | -2.389816000 | -2.754927000 | 2.661201000  |
| C  | -1.930578000 | -1.851029000 | 1.552883000  |
| O  | -1.308085000 | -0.816433000 | 1.699226000  |
| O  | -2.294139000 | -2.350437000 | 0.349195000  |
| H  | -3.483575000 | -2.744147000 | 2.697299000  |
| H  | -2.070754000 | -3.783583000 | 2.470342000  |
| H  | -1.987358000 | -2.404847000 | 3.611902000  |
| C  | -2.522136000 | 0.586041000  | -2.047950000 |
| C  | -0.261636000 | -0.102998000 | -1.689149000 |
| C  | -2.885117000 | -0.294219000 | -0.850048000 |
| C  | -2.055957000 | -1.576042000 | -0.860814000 |
| C  | -0.602103000 | -1.273446000 | -1.136416000 |
| O  | -1.119086000 | 0.904074000  | -2.024722000 |
| C  | -3.290808000 | 1.898956000  | -2.062774000 |
| H  | 0.763346000  | 0.158643000  | -1.923207000 |
| H  | -2.454353000 | -2.244448000 | -1.631140000 |
| H  | -2.741272000 | 0.050648000  | -2.982180000 |
| H  | -4.340291000 | 1.693591000  | -2.281124000 |
| H  | -2.898304000 | 2.552181000  | -2.844586000 |
| C  | 2.100370000  | -3.730465000 | -1.733512000 |
| C  | 0.432938000  | -2.333481000 | -0.823455000 |
| C  | 3.213636000  | -3.322745000 | -0.756349000 |
| C  | 2.667068000  | -2.447939000 | 0.357764000  |
| C  | 1.360781000  | -1.979853000 | 0.327497000  |
| O  | 1.175429000  | -2.667810000 | -1.997040000 |
| H  | -0.115707000 | -3.231827000 | -0.487674000 |
| H  | 2.877824000  | -0.623161000 | -1.465370000 |
| H  | 2.514584000  | -4.023312000 | -2.701426000 |
| H  | 4.032081000  | -2.817990000 | -1.278452000 |
| H  | 3.204700000  | -2.458796000 | 1.304433000  |
| H  | 3.641481000  | -4.228550000 | -0.309081000 |
| H  | 0.868371000  | -1.661738000 | 1.239905000  |
| H  | 1.548971000  | -4.592506000 | -1.325663000 |
| H  | 1.498936000  | 0.267055000  | 3.955349000  |
| N  | 0.554944000  | 1.414559000  | 2.560463000  |
| C  | 0.420370000  | 1.964013000  | 1.213797000  |
| H  | -0.219139000 | 1.313710000  | 0.610536000  |
| H  | -0.048740000 | 2.946888000  | 1.285536000  |
| H  | 1.399115000  | 2.061361000  | 0.745290000  |
| C  | -0.546445000 | 1.683002000  | 3.480157000  |
| H  | -0.648367000 | 2.761339000  | 3.636380000  |
| H  | -1.475228000 | 1.286897000  | 3.060747000  |
| H  | -0.358772000 | 1.198491000  | 4.440381000  |
| O  | 3.331189000  | 1.665760000  | -0.460849000 |

|   |              |              |              |
|---|--------------|--------------|--------------|
| C | 4.617813000  | 1.842765000  | -0.528236000 |
| O | 5.474290000  | 0.960376000  | -0.387379000 |
| C | 5.016629000  | 3.287733000  | -0.806779000 |
| H | 4.582799000  | 3.949824000  | -0.050274000 |
| H | 6.102859000  | 3.396392000  | -0.806765000 |
| H | 4.621469000  | 3.603070000  | -1.778543000 |
| H | -2.719311000 | 0.255101000  | 0.074744000  |
| O | -4.280368000 | -0.621510000 | -0.986141000 |
| C | -5.034487000 | -0.678405000 | 0.143977000  |
| O | -4.600068000 | -0.476534000 | 1.258428000  |
| C | -6.458000000 | -1.020126000 | -0.196301000 |
| H | -6.492255000 | -1.964427000 | -0.748308000 |
| H | -7.045558000 | -1.101186000 | 0.718067000  |
| H | -6.881840000 | -0.245219000 | -0.842961000 |

### GIII<sub>1a</sub>

|    |              |              |              |
|----|--------------|--------------|--------------|
| Pd | -2.781381000 | 0.139963000  | 0.121431000  |
| O  | -1.981841000 | -0.868454000 | -1.739690000 |
| C  | -1.305138000 | -1.907075000 | -1.531475000 |
| C  | 3.238515000  | -1.235539000 | 4.270954000  |
| C  | 4.086606000  | -0.832815000 | 3.089878000  |
| O  | 5.047390000  | -0.098216000 | 3.168883000  |
| O  | 3.802369000  | -1.359939000 | 1.865636000  |
| H  | 3.659529000  | -0.774139000 | 5.164024000  |
| H  | 2.205276000  | -0.905746000 | 4.142120000  |
| H  | 3.234767000  | -2.323770000 | 4.393158000  |
| C  | 2.967840000  | 3.465448000  | -2.325075000 |
| C  | 2.430514000  | 2.687927000  | -1.155590000 |
| O  | 2.724511000  | 2.862203000  | 0.007915000  |
| O  | 1.557707000  | 1.739071000  | -1.585054000 |
| H  | 2.154819000  | 3.794266000  | -2.978137000 |
| H  | 3.536413000  | 4.323924000  | -1.966970000 |
| H  | 3.621787000  | 2.808936000  | -2.908005000 |
| C  | 1.547644000  | -1.020863000 | 1.009551000  |
| C  | 0.338467000  | 0.890557000  | 1.735763000  |
| C  | 2.122656000  | -0.145094000 | -0.106179000 |
| C  | 1.029101000  | 0.777483000  | -0.635428000 |
| C  | 0.246317000  | 1.391918000  | 0.499352000  |
| O  | 1.116217000  | -0.178613000 | 2.091743000  |
| C  | 2.557607000  | -2.011860000 | 1.564296000  |
| H  | -0.208198000 | 1.292228000  | 2.579618000  |
| H  | 0.362762000  | 0.184002000  | -1.265482000 |
| H  | 0.681298000  | -1.583202000 | 0.631852000  |
| H  | 2.786608000  | -2.752272000 | 0.796126000  |
| H  | 2.136620000  | -2.531329000 | 2.427425000  |
| C  | -2.336882000 | 3.974778000  | 1.029563000  |
| C  | -0.740497000 | 2.482679000  | 0.146163000  |
| C  | -3.573692000 | 3.286080000  | 0.441154000  |
| C  | -3.155742000 | 2.252658000  | -0.591351000 |
| C  | -1.823349000 | 1.929106000  | -0.766944000 |
| O  | -1.290702000 | 3.042020000  | 1.327344000  |
| H  | -0.215441000 | 3.274300000  | -0.419740000 |
| H  | -3.863825000 | 2.028432000  | -1.387307000 |
| H  | -1.957480000 | 4.728953000  | 0.322598000  |
| H  | -4.194588000 | 4.039171000  | -0.059570000 |
| H  | -3.169006000 | 0.757899000  | 1.443577000  |
| H  | -4.190701000 | 2.843203000  | 1.227127000  |
| H  | -2.572676000 | 4.479516000  | 1.969481000  |
| H  | -1.486551000 | 1.504790000  | -1.708422000 |
| H  | -1.478866000 | -2.517139000 | -0.637969000 |

|   |              |              |              |
|---|--------------|--------------|--------------|
| N | -0.342927000 | -2.342919000 | -2.341853000 |
| C | 0.022845000  | -1.619533000 | -3.556093000 |
| H | -0.744908000 | -0.882272000 | -3.787121000 |
| H | 0.981530000  | -1.111547000 | -3.412143000 |
| H | 0.115177000  | -2.326297000 | -4.385530000 |
| C | 0.451010000  | -3.521286000 | -2.009216000 |
| H | 0.090375000  | -3.963141000 | -1.078611000 |
| H | 0.375456000  | -4.262717000 | -2.810804000 |
| H | 1.498158000  | -3.233180000 | -1.884135000 |
| O | -2.965101000 | -1.725535000 | 1.003587000  |
| C | -4.111992000 | -2.323104000 | 0.836041000  |
| C | -4.119032000 | -3.759913000 | 1.343729000  |
| H | -5.126753000 | -4.177632000 | 1.304743000  |
| H | -3.454693000 | -4.370197000 | 0.721521000  |
| H | -3.739185000 | -3.806464000 | 2.368808000  |
| O | -5.113662000 | -1.822767000 | 0.313189000  |
| O | 2.567340000  | -1.027505000 | -1.154703000 |
| H | 2.963019000  | 0.431446000  | 0.275975000  |
| C | 3.693776000  | -0.685738000 | -1.840882000 |
| C | 4.055023000  | -1.763374000 | -2.824060000 |
| H | 4.899605000  | -1.437478000 | -3.431259000 |
| H | 4.325466000  | -2.674404000 | -2.280013000 |
| H | 3.201665000  | -2.001561000 | -3.465113000 |
| O | 4.309144000  | 0.341600000  | -1.653795000 |

#### TS4I<sub>1a</sub>

|    |              |              |              |
|----|--------------|--------------|--------------|
| Pd | 3.036839000  | 0.113195000  | 0.519519000  |
| O  | 1.943078000  | 0.746752000  | 2.664308000  |
| C  | 0.715891000  | 0.923767000  | 2.786382000  |
| C  | -5.661826000 | 2.319322000  | -0.971853000 |
| C  | -4.428195000 | 2.479627000  | -0.117163000 |
| O  | -4.454794000 | 2.824125000  | 1.045205000  |
| O  | -3.208596000 | 2.246293000  | -0.671616000 |
| H  | -6.522022000 | 2.649992000  | -0.390616000 |
| H  | -5.590770000 | 2.908926000  | -1.890725000 |
| H  | -5.813144000 | 1.273057000  | -1.256627000 |
| C  | -2.127908000 | -3.330676000 | 2.291422000  |
| C  | -1.604026000 | -2.246417000 | 1.392501000  |
| O  | -1.132396000 | -1.190144000 | 1.764301000  |
| O  | -1.740187000 | -2.600787000 | 0.093087000  |
| H  | -3.220267000 | -3.343246000 | 2.216596000  |
| H  | -1.757538000 | -4.309973000 | 1.977408000  |
| H  | -1.837816000 | -3.125566000 | 3.322133000  |
| C  | -2.048709000 | 0.571829000  | -1.956061000 |
| C  | 0.201669000  | 0.160707000  | -1.308346000 |
| C  | -2.442274000 | -0.483556000 | -0.921505000 |
| C  | -1.448980000 | -1.639306000 | -0.960619000 |
| C  | -0.032557000 | -1.115046000 | -0.972152000 |
| O  | -0.740265000 | 1.086982000  | -1.653319000 |
| C  | -3.020799000 | 1.736617000  | -2.004061000 |
| H  | 1.201980000  | 0.579843000  | -1.345469000 |
| H  | -1.638911000 | -2.236392000 | -1.858702000 |
| H  | -2.017461000 | 0.117281000  | -2.956258000 |
| H  | -3.952203000 | 1.392832000  | -2.452161000 |
| H  | -2.606211000 | 2.537282000  | -2.623093000 |
| C  | 2.958047000  | -3.181476000 | -1.619212000 |
| C  | 1.096022000  | -2.080622000 | -0.679184000 |
| C  | 3.970032000  | -2.756423000 | -0.546145000 |
| C  | 3.268181000  | -2.075358000 | 0.619565000  |
| C  | 1.913795000  | -1.755283000 | 0.561862000  |

|   |              |              |              |
|---|--------------|--------------|--------------|
| O | 1.937011000  | -2.202310000 | -1.832034000 |
| H | 0.633203000  | -3.064967000 | -0.485249000 |
| H | 3.673247000  | 0.120307000  | -0.944519000 |
| H | 3.446488000  | -3.331793000 | -2.585814000 |
| H | 4.742480000  | -2.109584000 | -0.973527000 |
| H | 3.748012000  | -2.163798000 | 1.593985000  |
| H | 4.486254000  | -3.651374000 | -0.175452000 |
| H | 1.334867000  | -1.633679000 | 1.473599000  |
| H | 2.487828000  | -4.134311000 | -1.326177000 |
| H | 0.129178000  | 0.327957000  | 3.498795000  |
| N | -0.024998000 | 1.810796000  | 2.109070000  |
| C | 0.554438000  | 2.739326000  | 1.148230000  |
| H | 0.051164000  | 2.630151000  | 0.182928000  |
| H | 0.420650000  | 3.770272000  | 1.498677000  |
| H | 1.618490000  | 2.538504000  | 1.028702000  |
| C | -1.452255000 | 1.953990000  | 2.371383000  |
| H | -1.647658000 | 2.856486000  | 2.964475000  |
| H | -1.995618000 | 2.044403000  | 1.430016000  |
| H | -1.822469000 | 1.079180000  | 2.907251000  |
| O | 3.918892000  | 2.081079000  | 0.098636000  |
| C | 4.400962000  | 2.059184000  | -1.079987000 |
| O | 4.354086000  | 1.037686000  | -1.838523000 |
| C | 5.098500000  | 3.299756000  | -1.586043000 |
| H | 6.130144000  | 3.292001000  | -1.215850000 |
| H | 5.123831000  | 3.320885000  | -2.676700000 |
| H | 4.609850000  | 4.197475000  | -1.200890000 |
| O | -3.754509000 | -0.957899000 | -1.280047000 |
| H | -2.463085000 | -0.038505000 | 0.071922000  |
| C | -4.626576000 | -1.234661000 | -0.273130000 |
| C | -5.917289000 | -1.768390000 | -0.827978000 |
| H | -5.765988000 | -2.814100000 | -1.119454000 |
| H | -6.693265000 | -1.720859000 | -0.063700000 |
| H | -6.221521000 | -1.216611000 | -1.720414000 |
| O | -4.370847000 | -1.082535000 | 0.903266000  |

### TS4III<sub>1a</sub>

|    |              |              |              |
|----|--------------|--------------|--------------|
| Pd | -2.801590000 | -0.121598000 | 0.589432000  |
| O  | -1.430379000 | -0.251629000 | 2.645032000  |
| C  | -0.661551000 | 0.712917000  | 2.827748000  |
| C  | 2.632747000  | 3.682587000  | -2.879098000 |
| C  | 3.609725000  | 2.604498000  | -2.477968000 |
| O  | 4.429256000  | 2.125384000  | -3.231737000 |
| O  | 3.617120000  | 2.169901000  | -1.187401000 |
| H  | 2.817604000  | 3.935308000  | -3.922931000 |
| H  | 1.602016000  | 3.340179000  | -2.762734000 |
| H  | 2.765517000  | 4.577453000  | -2.262131000 |
| C  | 2.761174000  | -4.243812000 | -0.655893000 |
| C  | 2.163202000  | -2.904139000 | -0.987133000 |
| O  | 2.243120000  | -2.336966000 | -2.055988000 |
| O  | 1.513772000  | -2.399568000 | 0.093917000  |
| H  | 3.121318000  | -4.722652000 | -1.566814000 |
| H  | 3.598865000  | -4.088818000 | 0.031758000  |
| H  | 2.029201000  | -4.883104000 | -0.155046000 |
| C  | 1.525152000  | 1.373283000  | -0.230006000 |
| C  | -0.043215000 | 0.364498000  | -1.700465000 |
| C  | 2.126366000  | -0.021903000 | -0.042982000 |
| C  | 0.995853000  | -1.043925000 | 0.045129000  |
| C  | -0.021251000 | -0.801019000 | -1.044038000 |
| O  | 0.811607000  | 1.411944000  | -1.476105000 |
| C  | 2.567399000  | 2.477817000  | -0.255710000 |

|   |              |              |              |
|---|--------------|--------------|--------------|
| H | -0.755782000 | 0.587156000  | -2.484411000 |
| H | 0.520364000  | -0.950709000 | 1.025024000  |
| H | 0.820638000  | 1.585430000  | 0.586027000  |
| H | 3.043095000  | 2.542810000  | 0.724383000  |
| H | 2.088570000  | 3.435683000  | -0.467670000 |
| C | -2.923902000 | -2.433961000 | -2.619631000 |
| C | -1.069233000 | -1.866605000 | -1.274416000 |
| C | -3.994743000 | -2.249676000 | -1.541488000 |
| C | -3.339193000 | -2.148272000 | -0.172261000 |
| C | -1.959616000 | -2.022482000 | -0.046372000 |
| O | -1.824207000 | -1.539542000 | -2.432512000 |
| H | -0.562556000 | -2.835108000 | -1.440528000 |
| H | -3.908571000 | -2.531777000 | 0.673205000  |
| H | -2.555613000 | -3.472308000 | -2.608844000 |
| H | -4.664114000 | -3.119216000 | -1.552894000 |
| H | -3.465044000 | 0.464984000  | -0.731327000 |
| H | -4.613976000 | -1.374805000 | -1.760842000 |
| H | -3.321305000 | -2.226436000 | -3.616621000 |
| H | -1.458967000 | -2.357643000 | 0.860055000  |
| H | -0.911142000 | 1.722287000  | 2.469662000  |
| N | 0.517727000  | 0.634296000  | 3.458885000  |
| C | 0.998269000  | -0.636807000 | 3.989184000  |
| H | 0.155133000  | -1.312169000 | 4.133281000  |
| H | 1.709967000  | -1.094171000 | 3.295052000  |
| H | 1.496048000  | -0.463071000 | 4.947077000  |
| C | 1.402579000  | 1.786567000  | 3.575273000  |
| H | 0.954526000  | 2.650285000  | 3.079581000  |
| H | 1.573967000  | 2.028516000  | 4.629736000  |
| H | 2.362309000  | 1.564536000  | 3.100593000  |
| O | -3.395132000 | 1.955676000  | 0.928151000  |
| C | -3.901722000 | 2.415521000  | -0.147530000 |
| C | -4.422909000 | 3.833503000  | -0.133144000 |
| H | -3.792001000 | 4.466771000  | 0.494606000  |
| H | -4.483800000 | 4.241969000  | -1.143032000 |
| H | -5.429910000 | 3.827099000  | 0.299800000  |
| O | -4.022121000 | 1.734051000  | -1.214254000 |
| O | 2.873572000  | -0.008404000 | 1.188026000  |
| H | 2.787994000  | -0.250708000 | -0.876627000 |
| C | 4.031370000  | -0.723738000 | 1.241674000  |
| C | 4.699699000  | -0.540752000 | 2.575322000  |
| H | 5.646319000  | -1.080891000 | 2.585959000  |
| H | 4.873089000  | 0.522772000  | 2.765403000  |
| H | 4.052491000  | -0.918099000 | 3.372933000  |
| O | 4.445345000  | -1.403688000 | 0.327258000  |

### III<sub>1a</sub>

|    |              |              |              |
|----|--------------|--------------|--------------|
| Pd | 2.886633000  | 0.267365000  | 0.218859000  |
| O  | 1.422769000  | 2.026935000  | 0.370143000  |
| C  | 0.443301000  | 1.878366000  | 1.136112000  |
| C  | -5.953984000 | 2.523484000  | -1.455314000 |
| C  | -4.877521000 | 2.433070000  | -0.404982000 |
| O  | -4.927432000 | 2.990696000  | 0.671787000  |
| O  | -3.785552000 | 1.668975000  | -0.668414000 |
| H  | -6.697942000 | 3.249546000  | -1.128951000 |
| H  | -5.543900000 | 2.824243000  | -2.423975000 |
| H  | -6.438070000 | 1.549538000  | -1.586961000 |
| C  | -1.199039000 | -3.018651000 | 2.997792000  |
| C  | -1.133790000 | -2.040997000 | 1.856021000  |
| O  | -0.869313000 | -0.859368000 | 1.957913000  |
| O  | -1.401864000 | -2.666581000 | 0.688292000  |

|   |              |              |              |
|---|--------------|--------------|--------------|
| H | -2.217021000 | -3.411505000 | 3.081558000  |
| H | -0.529545000 | -3.863042000 | 2.807973000  |
| H | -0.918560000 | -2.520185000 | 3.925871000  |
| C | -2.492682000 | -0.010351000 | -1.786010000 |
| C | -0.151423000 | -0.031177000 | -1.476611000 |
| C | -2.596910000 | -0.894325000 | -0.542323000 |
| C | -1.459425000 | -1.912289000 | -0.557808000 |
| C | -0.155699000 | -1.259693000 | -0.944011000 |
| O | -1.258869000 | 0.722250000  | -1.747049000 |
| C | -3.635603000 | 0.974076000  | -1.920832000 |
| H | 0.758855000  | 0.484681000  | -1.756723000 |
| H | -1.711821000 | -2.701691000 | -1.274090000 |
| H | -2.494120000 | -0.640133000 | -2.687750000 |
| H | -4.543142000 | 0.420932000  | -2.171288000 |
| H | -3.413153000 | 1.684530000  | -2.722789000 |
| C | 2.962317000  | -2.895730000 | -2.030079000 |
| C | 1.119070000  | -2.066980000 | -0.807252000 |
| C | 4.060348000  | -2.276567000 | -1.163632000 |
| C | 3.473586000  | -1.766391000 | 0.158999000  |
| C | 2.059088000  | -1.636366000 | 0.318389000  |
| O | 1.794686000  | -2.073344000 | -2.074257000 |
| H | 0.815562000  | -3.107311000 | -0.585272000 |
| H | 3.293376000  | -3.019842000 | -3.066005000 |
| H | 4.553071000  | -1.473704000 | -1.724503000 |
| H | 4.046134000  | -2.037168000 | 1.049493000  |
| H | 4.828337000  | -3.036020000 | -0.968345000 |
| H | 1.630430000  | -1.796133000 | 1.308779000  |
| H | 2.691555000  | -3.891906000 | -1.640667000 |
| H | 0.462041000  | 1.149784000  | 1.952098000  |
| N | -0.701911000 | 2.561100000  | 1.051907000  |
| C | -0.933426000 | 3.554717000  | 0.013146000  |
| H | -1.834090000 | 3.289170000  | -0.545649000 |
| H | -1.067516000 | 4.545302000  | 0.463373000  |
| H | -0.078519000 | 3.576230000  | -0.661138000 |
| C | -1.750885000 | 2.389712000  | 2.052350000  |
| H | -1.784975000 | 3.258905000  | 2.721343000  |
| H | -2.720627000 | 2.295912000  | 1.558057000  |
| H | -1.557738000 | 1.490027000  | 2.638422000  |
| O | 4.516050000  | 1.964413000  | -0.009122000 |
| C | 5.674279000  | 1.578578000  | 0.160461000  |
| O | 5.955153000  | 0.317258000  | 0.478898000  |
| C | 6.881519000  | 2.455938000  | 0.029128000  |
| H | 7.434616000  | 2.464303000  | 0.973643000  |
| H | 7.547660000  | 2.049141000  | -0.738231000 |
| H | 6.583543000  | 3.469935000  | -0.236074000 |
| H | 5.075622000  | -0.158456000 | 0.504848000  |
| O | -3.866413000 | -1.572875000 | -0.605755000 |
| H | -2.547711000 | -0.275553000 | 0.350860000  |
| C | -4.545398000 | -1.757750000 | 0.556851000  |
| C | -5.873484000 | -2.408332000 | 0.285877000  |
| H | -5.727858000 | -3.350603000 | -0.250832000 |
| H | -6.393524000 | -2.591700000 | 1.226057000  |
| H | -6.479494000 | -1.756312000 | -0.351712000 |
| O | -4.126545000 | -1.427292000 | 1.646323000  |

### III<sub>1a</sub>

|    |              |              |              |
|----|--------------|--------------|--------------|
| Pd | 2.596519000  | -0.376120000 | -0.453703000 |
| O  | 1.292841000  | 1.387563000  | -1.203045000 |
| C  | 1.089895000  | 2.306373000  | -0.383103000 |
| C  | -3.491245000 | 3.345494000  | 2.345671000  |

|   |              |              |              |
|---|--------------|--------------|--------------|
| C | -4.344134000 | 2.175889000  | 1.914651000  |
| O | -5.157446000 | 1.637379000  | 2.634644000  |
| O | -4.244080000 | 1.725038000  | 0.634182000  |
| H | -3.751329000 | 3.591674000  | 3.375082000  |
| H | -2.428728000 | 3.099984000  | 2.284495000  |
| H | -3.677661000 | 4.216500000  | 1.708544000  |
| C | -2.721384000 | -4.617128000 | -0.380543000 |
| C | -2.357505000 | -3.265443000 | 0.169918000  |
| O | -2.719496000 | -2.815090000 | 1.236324000  |
| O | -1.559191000 | -2.601807000 | -0.704743000 |
| H | -1.833502000 | -5.137867000 | -0.749189000 |
| H | -3.214314000 | -5.208861000 | 0.391132000  |
| H | -3.403704000 | -4.475107000 | -1.224747000 |
| C | -2.029932000 | 1.114181000  | -0.168594000 |
| C | -0.641477000 | 0.148677000  | 1.521375000  |
| C | -2.446178000 | -0.315842000 | -0.517992000 |
| C | -1.214262000 | -1.214250000 | -0.444849000 |
| C | -0.463155000 | -0.985896000 | 0.842457000  |
| O | -1.488332000 | 1.170691000  | 1.159224000  |
| C | -3.169645000 | 2.115514000  | -0.235953000 |
| H | -0.120059000 | 0.373342000  | 2.443916000  |
| H | -0.566014000 | -0.978149000 | -1.294697000 |
| H | -1.262838000 | 1.426602000  | -0.884720000 |
| H | -3.581621000 | 2.122090000  | -1.246579000 |
| H | -2.798272000 | 3.116446000  | -0.010484000 |
| C | 2.386444000  | -1.238808000 | 2.693773000  |
| C | 0.580451000  | -2.014986000 | 1.239123000  |
| C | 3.421617000  | -2.088799000 | 1.965128000  |
| C | 3.037547000  | -2.228860000 | 0.501034000  |
| C | 1.660141000  | -2.139278000 | 0.159369000  |
| O | 1.070636000  | -1.784523000 | 2.564024000  |
| H | 0.079104000  | -2.992071000 | 1.300505000  |
| H | 3.678016000  | -2.879395000 | -0.098533000 |
| H | 2.579538000  | -1.212840000 | 3.770764000  |
| H | 3.466483000  | -3.081248000 | 2.438080000  |
| H | 4.412728000  | -1.633821000 | 2.082939000  |
| H | 2.419742000  | -0.205217000 | 2.313559000  |
| H | 1.301139000  | -2.674342000 | -0.720848000 |
| H | 1.467567000  | 2.252697000  | 0.645915000  |
| N | 0.398869000  | 3.423933000  | -0.646740000 |
| C | -0.168136000 | 3.687434000  | -1.963640000 |
| H | 0.110314000  | 2.885348000  | -2.646105000 |
| H | -1.260168000 | 3.745594000  | -1.897235000 |
| H | 0.210585000  | 4.640988000  | -2.346337000 |
| C | 0.133467000  | 4.412043000  | 0.390439000  |
| H | 0.588024000  | 4.098139000  | 1.331897000  |
| H | 0.545764000  | 5.384650000  | 0.101220000  |
| H | -0.946472000 | 4.519611000  | 0.538855000  |
| O | 4.270618000  | 1.236581000  | -0.821837000 |
| C | 5.421980000  | 0.827009000  | -0.655806000 |
| C | 6.645699000  | 1.674970000  | -0.817084000 |
| H | 7.193724000  | 1.709152000  | 0.129941000  |
| H | 7.308301000  | 1.227361000  | -1.564264000 |
| H | 6.366655000  | 2.683366000  | -1.121373000 |
| O | 5.674824000  | -0.432052000 | -0.308869000 |
| H | 4.781948000  | -0.875122000 | -0.229221000 |
| O | -2.927421000 | -0.276949000 | -1.876686000 |
| C | -3.944606000 | -1.108034000 | -2.222723000 |
| C | -4.283726000 | -0.936067000 | -3.677306000 |
| H | -3.418042000 | -1.208222000 | -4.289897000 |
| H | -5.132247000 | -1.569193000 | -3.936294000 |
| H | -4.519085000 | 0.111664000  | -3.887261000 |

|   |              |              |              |
|---|--------------|--------------|--------------|
| O | -4.489123000 | -1.871363000 | -1.452545000 |
| H | -3.229322000 | -0.668675000 | 0.150974000  |

### 5e+[Pd(DMF)<sub>2</sub>]

|    |              |              |              |
|----|--------------|--------------|--------------|
| Pd | 2.766507000  | -0.330063000 | 0.528628000  |
| O  | 1.540370000  | 1.575271000  | 1.141822000  |
| C  | 0.420045000  | 1.424453000  | 1.674184000  |
| C  | -5.631893000 | 2.807288000  | -1.548542000 |
| C  | -4.522540000 | 2.835440000  | -0.527130000 |
| O  | -4.635099000 | 3.331421000  | 0.574548000  |
| O  | -3.322917000 | 2.281120000  | -0.843997000 |
| H  | -6.471809000 | 3.378210000  | -1.153753000 |
| H  | -5.311017000 | 3.236886000  | -2.502159000 |
| H  | -5.960885000 | 1.779232000  | -1.735570000 |
| C  | -2.934113000 | -3.109131000 | 2.665260000  |
| C  | -2.218244000 | -2.182812000 | 1.720799000  |
| O  | -1.575499000 | -1.205063000 | 2.049144000  |
| O  | -2.392441000 | -2.586430000 | 0.442190000  |
| H  | -2.657497000 | -2.874629000 | 3.693406000  |
| H  | -4.012707000 | -2.971812000 | 2.536757000  |
| H  | -2.699063000 | -4.152315000 | 2.437093000  |
| C  | -2.215458000 | 0.403745000  | -1.860092000 |
| C  | -0.076345000 | -0.171953000 | -1.022130000 |
| C  | -2.777875000 | -0.494212000 | -0.759075000 |
| C  | -1.927314000 | -1.754364000 | -0.659482000 |
| C  | -0.459523000 | -1.391291000 | -0.615950000 |
| O  | -0.891493000 | 0.818661000  | -1.496540000 |
| C  | -3.064287000 | 1.635689000  | -2.105345000 |
| H  | 0.958633000  | 0.153804000  | -0.978632000 |
| H  | -2.139318000 | -2.394841000 | -1.521743000 |
| H  | -2.159320000 | -0.156636000 | -2.804854000 |
| H  | -3.984731000 | 1.325718000  | -2.598695000 |
| H  | -2.529068000 | 2.334258000  | -2.755234000 |
| C  | 2.077950000  | -2.650916000 | -2.080364000 |
| C  | 0.524328000  | -2.492860000 | -0.251233000 |
| C  | 3.308812000  | -2.873124000 | -1.206360000 |
| C  | 3.059094000  | -2.377270000 | 0.211002000  |
| C  | 1.719217000  | -2.133748000 | 0.648317000  |
| O  | 0.922229000  | -3.199564000 | -1.452363000 |
| H  | -0.047095000 | -3.251647000 | 0.293565000  |
| H  | 1.934182000  | -1.578721000 | -2.290023000 |
| H  | 4.181767000  | -2.384661000 | -1.659032000 |
| H  | 3.780982000  | -2.740770000 | 0.946955000  |
| H  | 3.526348000  | -3.952006000 | -1.184384000 |
| H  | 1.486493000  | -2.295806000 | 1.702725000  |
| H  | 2.174840000  | -3.165598000 | -3.042063000 |
| H  | 0.185043000  | 0.539830000  | 2.277614000  |
| N  | -0.598282000 | 2.286961000  | 1.567167000  |
| C  | -0.495215000 | 3.494028000  | 0.759524000  |
| H  | -1.336754000 | 3.532169000  | 0.063261000  |
| H  | -0.519209000 | 4.384802000  | 1.398933000  |
| H  | 0.442021000  | 3.474837000  | 0.204863000  |
| C  | -1.836068000 | 2.094472000  | 2.315759000  |
| H  | -1.900362000 | 2.818898000  | 3.137814000  |
| H  | -2.693329000 | 2.246955000  | 1.655634000  |
| H  | -1.870450000 | 1.082924000  | 2.721676000  |
| H  | -2.771907000 | 0.042259000  | 0.188790000  |
| O  | -4.129148000 | -0.834760000 | -1.123130000 |
| C  | -5.061020000 | -0.870464000 | -0.134499000 |
| C  | -6.405206000 | -1.239322000 | -0.697214000 |

|   |              |              |              |
|---|--------------|--------------|--------------|
| H | -6.376429000 | -2.276186000 | -1.049197000 |
| H | -7.167900000 | -1.137733000 | 0.074837000  |
| H | -6.647488000 | -0.606796000 | -1.555886000 |
| O | -4.819523000 | -0.642994000 | 1.032967000  |
| O | 4.484019000  | 1.152415000  | 0.188999000  |
| C | 5.605200000  | 0.785165000  | -0.216145000 |
| H | 5.817790000  | -0.271306000 | -0.429799000 |
| N | 6.645708000  | 1.601444000  | -0.428838000 |
| C | 6.554446000  | 3.038290000  | -0.202546000 |
| H | 7.337846000  | 3.353922000  | 0.494584000  |
| H | 6.689135000  | 3.576481000  | -1.147540000 |
| H | 5.577653000  | 3.278743000  | 0.215180000  |
| C | 7.919370000  | 1.093315000  | -0.921958000 |
| H | 8.170905000  | 1.569244000  | -1.876201000 |
| H | 8.717238000  | 1.310128000  | -0.203250000 |
| H | 7.859993000  | 0.013124000  | -1.070649000 |

#### 4e+[Pd(DMF)<sub>2</sub>]

|    |              |              |              |
|----|--------------|--------------|--------------|
| Pd | -2.455025000 | 0.558558000  | -0.581776000 |
| C  | 4.423536000  | -1.369220000 | 3.864356000  |
| C  | 5.091776000  | -0.849028000 | 2.614476000  |
| O  | 6.044891000  | -0.099741000 | 2.625265000  |
| O  | 4.641563000  | -1.270626000 | 1.400973000  |
| H  | 4.936985000  | -0.941682000 | 4.725397000  |
| H  | 3.367566000  | -1.091932000 | 3.889824000  |
| H  | 4.488745000  | -2.461676000 | 3.913156000  |
| C  | 2.763775000  | 3.517122000  | -2.552486000 |
| C  | 2.524621000  | 2.683492000  | -1.323157000 |
| O  | 3.057828000  | 2.844183000  | -0.244583000 |
| O  | 1.620077000  | 1.709873000  | -1.588716000 |
| H  | 3.264219000  | 2.898399000  | -3.304130000 |
| H  | 1.815283000  | 3.857880000  | -2.977245000 |
| H  | 3.393232000  | 4.371864000  | -2.303674000 |
| C  | 2.262723000  | -1.071094000 | 0.904886000  |
| C  | 1.114372000  | 0.765082000  | 1.881076000  |
| C  | 2.538880000  | -0.168285000 | -0.299525000 |
| C  | 1.319299000  | 0.709403000  | -0.575809000 |
| C  | 0.744300000  | 1.272023000  | 0.699942000  |
| O  | 2.002368000  | -0.266047000 | 2.061437000  |
| C  | 3.415606000  | -2.003194000 | 1.236217000  |
| H  | 0.736812000  | 1.132865000  | 2.826902000  |
| H  | 0.562931000  | 0.099580000  | -1.076894000 |
| H  | 1.379740000  | -1.688813000 | 0.698894000  |
| H  | 3.580686000  | -2.679847000 | 0.395877000  |
| H  | 3.169473000  | -2.601914000 | 2.114887000  |
| C  | -1.871978000 | 3.582910000  | 1.870661000  |
| C  | -0.253024000 | 2.409532000  | 0.602313000  |
| C  | -3.090703000 | 3.161070000  | 1.052701000  |
| C  | -2.638274000 | 2.624713000  | -0.309701000 |
| C  | -1.270827000 | 2.264136000  | -0.529988000 |
| O  | -0.881253000 | 2.555002000  | 1.876852000  |
| H  | 0.322356000  | 3.336648000  | 0.405168000  |
| H  | -3.184844000 | 3.036518000  | -1.161151000 |
| H  | -1.440239000 | 4.510826000  | 1.459748000  |
| H  | -3.749688000 | 4.029245000  | 0.921746000  |
| H  | -3.662898000 | 2.417127000  | 1.620115000  |
| H  | -2.129333000 | 3.766670000  | 2.918679000  |
| H  | -0.833120000 | 2.455445000  | -1.510580000 |
| H  | 3.423344000  | 0.438534000  | -0.113915000 |
| O  | 2.762007000  | -1.036809000 | -1.428707000 |

|   |              |              |              |
|---|--------------|--------------|--------------|
| C | 3.655520000  | -0.644355000 | -2.374754000 |
| C | 3.724939000  | -1.664095000 | -3.477745000 |
| H | 4.049346000  | -2.628203000 | -3.073738000 |
| H | 2.732285000  | -1.806280000 | -3.915801000 |
| H | 4.425054000  | -1.330686000 | -4.243719000 |
| O | 4.297433000  | 0.383141000  | -2.314872000 |
| O | -4.274182000 | -0.841258000 | -0.391051000 |
| C | -5.282713000 | -0.560524000 | 0.287038000  |
| H | -5.419233000 | 0.438067000  | 0.724837000  |
| N | -6.283312000 | -1.411103000 | 0.550907000  |
| C | -6.274737000 | -2.781535000 | 0.055423000  |
| H | -5.388410000 | -2.939011000 | -0.557786000 |
| H | -6.266915000 | -3.484463000 | 0.895873000  |
| H | -7.171935000 | -2.965026000 | -0.545407000 |
| C | -7.423425000 | -1.012151000 | 1.365524000  |
| H | -7.312714000 | 0.027893000  | 1.679089000  |
| H | -8.351738000 | -1.114737000 | 0.792984000  |
| H | -7.491262000 | -1.645958000 | 2.256676000  |
| O | -1.375924000 | -1.405992000 | -1.192382000 |
| C | -1.035507000 | -2.288373000 | -0.381887000 |
| H | -1.425240000 | -2.308000000 | 0.645022000  |
| N | -0.173080000 | -3.279903000 | -0.653529000 |
| C | 0.457009000  | -3.410741000 | -1.961915000 |
| H | 0.122012000  | -2.599141000 | -2.605886000 |
| H | 1.544183000  | -3.361636000 | -1.855772000 |
| H | 0.183566000  | -4.371574000 | -2.411313000 |
| C | 0.182722000  | -4.273139000 | 0.350629000  |
| H | -0.340431000 | -4.062960000 | 1.285914000  |
| H | -0.092356000 | -5.276253000 | 0.006791000  |
| H | 1.262618000  | -4.250705000 | 0.536101000  |

## 5e

|   |              |              |              |
|---|--------------|--------------|--------------|
| C | 5.054070000  | -0.618622000 | 0.318412000  |
| C | 3.932646000  | -0.966108000 | 1.268535000  |
| O | 3.972651000  | -0.746753000 | 2.460010000  |
| O | 2.816555000  | -1.564806000 | 0.776413000  |
| H | 5.885205000  | -0.228944000 | 0.905580000  |
| H | 5.386200000  | -1.494565000 | -0.247098000 |
| H | 4.741314000  | 0.146887000  | -0.399415000 |
| C | -1.562840000 | 3.054656000  | 1.130308000  |
| C | -1.176742000 | 1.641358000  | 0.787652000  |
| O | -1.058260000 | 0.732349000  | 1.583274000  |
| O | -0.971309000 | 1.527356000  | -0.546518000 |
| H | -1.777505000 | 3.128670000  | 2.196589000  |
| H | -0.741637000 | 3.730098000  | 0.871013000  |
| H | -2.440050000 | 3.355363000  | 0.550462000  |
| C | 1.222190000  | -1.512261000 | -1.027489000 |
| C | -1.006324000 | -2.098556000 | -0.502940000 |
| C | 0.850158000  | -0.080623000 | -0.654150000 |
| C | -0.569310000 | 0.249056000  | -1.115014000 |
| C | -1.508651000 | -0.904111000 | -0.845582000 |
| O | 0.316272000  | -2.416099000 | -0.377672000 |
| C | 2.638698000  | -1.871780000 | -0.618331000 |
| H | -1.643067000 | -2.950248000 | -0.291266000 |
| H | -0.544812000 | 0.478761000  | -2.185743000 |
| H | 1.138650000  | -1.651814000 | -2.115393000 |
| H | 3.329950000  | -1.319243000 | -1.254382000 |
| H | 2.805548000  | -2.943408000 | -0.764356000 |
| C | -3.024953000 | -0.787927000 | -1.074480000 |
| C | -3.612038000 | 0.593942000  | -0.879977000 |

|   |              |              |              |
|---|--------------|--------------|--------------|
| C | -4.473523000 | 0.868618000  | 0.103021000  |
| C | -3.903313000 | -1.350787000 | 1.059298000  |
| C | -4.855440000 | -0.159290000 | 1.135625000  |
| H | -4.296282000 | -2.220177000 | 1.593838000  |
| H | -2.931481000 | -1.081882000 | 1.494163000  |
| H | -4.818078000 | 0.276469000  | 2.142504000  |
| H | -5.894256000 | -0.482192000 | 0.976200000  |
| O | -3.729526000 | -1.766094000 | -0.304349000 |
| H | -3.326852000 | 1.348539000  | -1.606593000 |
| H | -4.927620000 | 1.855371000  | 0.171580000  |
| H | -3.222407000 | -1.069833000 | -2.119370000 |
| H | 0.926389000  | 0.037553000  | 0.424665000  |
| O | 1.781932000  | 0.798336000  | -1.314391000 |
| C | 2.281294000  | 1.846764000  | -0.606356000 |
| C | 3.223637000  | 2.650201000  | -1.459820000 |
| H | 2.656952000  | 3.147775000  | -2.254238000 |
| H | 3.725767000  | 3.399687000  | -0.848059000 |
| H | 3.958628000  | 1.997395000  | -1.938835000 |
| O | 1.990697000  | 2.087280000  | 0.546468000  |

#### 4e

|   |              |              |              |
|---|--------------|--------------|--------------|
| C | 5.006596000  | -1.206026000 | -0.331475000 |
| C | 4.087196000  | -1.373002000 | 0.855031000  |
| O | 4.418798000  | -1.136779000 | 1.996851000  |
| O | 2.818948000  | -1.814968000 | 0.648022000  |
| H | 5.987879000  | -0.912803000 | 0.040778000  |
| H | 5.096342000  | -2.135395000 | -0.902427000 |
| H | 4.641134000  | -0.428801000 | -1.010860000 |
| C | -0.556974000 | 3.591164000  | 1.377838000  |
| C | -0.544217000 | 2.103132000  | 1.157184000  |
| O | -0.401950000 | 1.262529000  | 2.019916000  |
| O | -0.700962000 | 1.823671000  | -0.162210000 |
| H | -0.675221000 | 3.805148000  | 2.440440000  |
| H | 0.397784000  | 4.000612000  | 1.030658000  |
| H | -1.355394000 | 4.065837000  | 0.802053000  |
| C | 0.897728000  | -1.556781000 | -0.780467000 |
| C | -1.214229000 | -1.757308000 | 0.280074000  |
| C | 0.841744000  | -0.067791000 | -0.435658000 |
| C | -0.580192000 | 0.450955000  | -0.625494000 |
| C | -1.580432000 | -0.505771000 | -0.021048000 |
| O | 0.029889000  | -2.293020000 | 0.092557000  |
| C | 2.297493000  | -2.129548000 | -0.655970000 |
| H | -1.897643000 | -2.476164000 | 0.715068000  |
| H | -0.760454000 | 0.562570000  | -1.699336000 |
| H | 0.562961000  | -1.705744000 | -1.817533000 |
| H | 2.910256000  | -1.719622000 | -1.458312000 |
| H | 2.261671000  | -3.218087000 | -0.761888000 |
| C | -2.999490000 | -0.013852000 | 0.192720000  |
| C | -3.654119000 | 0.360228000  | -1.123818000 |
| H | -2.955704000 | 0.894225000  | 0.822220000  |
| C | -4.862833000 | -0.085804000 | -1.475361000 |
| C | -5.135298000 | -0.817385000 | 0.872082000  |
| C | -5.683124000 | -0.944255000 | -0.547979000 |
| H | -5.559837000 | -1.571627000 | 1.540730000  |
| H | -5.378115000 | 0.176569000  | 1.279910000  |
| H | -6.736406000 | -0.637350000 | -0.568974000 |
| H | -5.657107000 | -1.994352000 | -0.871200000 |
| O | -3.721834000 | -1.023196000 | 0.891422000  |
| H | -3.089770000 | 1.023455000  | -1.774771000 |
| H | -5.286518000 | 0.183579000  | -2.441060000 |

|   |             |             |              |
|---|-------------|-------------|--------------|
| H | 1.171710000 | 0.085714000 | 0.589800000  |
| O | 1.724936000 | 0.611512000 | -1.349631000 |
| C | 2.482596000 | 1.632478000 | -0.868098000 |
| C | 3.319066000 | 2.223240000 | -1.968960000 |
| H | 2.663770000 | 2.741946000 | -2.677103000 |
| H | 4.034591000 | 2.930970000 | -1.550534000 |
| H | 3.841199000 | 1.436558000 | -2.520478000 |
| O | 2.463901000 | 2.004090000 | 0.286725000  |

### 6a

|   |              |              |              |
|---|--------------|--------------|--------------|
| C | -5.932296000 | -0.564910000 | 0.171460000  |
| C | -4.874449000 | 0.219673000  | -0.563046000 |
| O | -5.111733000 | 1.029018000  | -1.435034000 |
| O | -3.576157000 | 0.007154000  | -0.231401000 |
| H | -6.910516000 | -0.270119000 | -0.207522000 |
| H | -5.793186000 | -1.640559000 | 0.022385000  |
| H | -5.886151000 | -0.372501000 | 1.248260000  |
| C | 1.889162000  | 3.586486000  | 0.114185000  |
| C | 1.087475000  | 2.321760000  | -0.051786000 |
| O | 0.495640000  | 1.993961000  | -1.059465000 |
| O | 1.118363000  | 1.596488000  | 1.093093000  |
| H | 1.866387000  | 4.158809000  | -0.813447000 |
| H | 1.474804000  | 4.186934000  | 0.930140000  |
| H | 2.923338000  | 3.342707000  | 0.375996000  |
| C | -1.695459000 | -0.944537000 | 0.903374000  |
| C | 0.125632000  | -1.530979000 | -0.502569000 |
| C | -1.062674000 | 0.433553000  | 1.056817000  |
| C | 0.464790000  | 0.302014000  | 1.158980000  |
| C | 0.947313000  | -0.685007000 | 0.131850000  |
| O | -1.212831000 | -1.608780000 | -0.290637000 |
| C | -3.207939000 | -0.916138000 | 0.810164000  |
| H | 0.459307000  | -2.245564000 | -1.248164000 |
| H | 0.747190000  | -0.041448000 | 2.158527000  |
| H | -1.429964000 | -1.579906000 | 1.760379000  |
| H | -3.616783000 | -0.594690000 | 1.773793000  |
| H | -3.576677000 | -1.921173000 | 0.582974000  |
| I | 3.063317000  | -0.801061000 | -0.239912000 |
| H | -1.317939000 | 1.038216000  | 0.187851000  |
| H | -1.451188000 | 0.921297000  | 1.955178000  |

### [Pd(DMSO)<sub>2</sub>]

|    |              |              |              |
|----|--------------|--------------|--------------|
| Pd | -0.000001000 | -0.048039000 | 0.000026000  |
| S  | -2.280754000 | -0.027086000 | 0.187675000  |
| S  | 2.280745000  | -0.027094000 | -0.187651000 |
| O  | 2.894420000  | -0.317803000 | -1.542355000 |
| O  | -2.894551000 | -0.317823000 | 1.542321000  |
| C  | -3.064015000 | -1.122580000 | -1.031429000 |
| H  | -4.149131000 | -1.000622000 | -0.968495000 |
| H  | -2.695653000 | -0.859791000 | -2.026605000 |
| H  | -2.777141000 | -2.146781000 | -0.785004000 |
| C  | -2.962146000 | 1.546314000  | -0.411750000 |
| H  | -4.054327000 | 1.490837000  | -0.388615000 |
| H  | -2.602203000 | 2.333119000  | 0.254027000  |
| H  | -2.597486000 | 1.721256000  | -1.427398000 |

|   |             |              |              |
|---|-------------|--------------|--------------|
| C | 2.962080000 | 1.546370000  | 0.411681000  |
| H | 2.597427000 | 1.721347000  | 1.427325000  |
| H | 4.054265000 | 1.490973000  | 0.388530000  |
| H | 2.602080000 | 2.333123000  | -0.254130000 |
| C | 3.064206000 | -1.122554000 | 1.031363000  |
| H | 4.149309000 | -1.000586000 | 0.968211000  |
| H | 2.696036000 | -0.859713000 | 2.026596000  |
| H | 2.777301000 | -2.146769000 | 0.785039000  |

**B<sub>2a</sub>**

|    |              |              |              |
|----|--------------|--------------|--------------|
| Pd | 1.639669000  | -0.615452000 | -0.137794000 |
| C  | -4.942783000 | -3.630457000 | 0.243938000  |
| C  | -4.929430000 | -2.314109000 | -0.491584000 |
| O  | -5.917041000 | -1.805813000 | -0.984408000 |
| O  | -3.752882000 | -1.651645000 | -0.607062000 |
| H  | -5.926539000 | -4.084399000 | 0.126971000  |
| H  | -4.173670000 | -4.312040000 | -0.131365000 |
| H  | -4.751100000 | -3.467247000 | 1.309865000  |
| C  | -2.510910000 | 4.398605000  | 0.047950000  |
| C  | -1.886880000 | 3.071163000  | -0.299091000 |
| O  | -1.940950000 | 2.534870000  | -1.382897000 |
| O  | -1.230973000 | 2.579859000  | 0.785377000  |
| H  | -3.038857000 | 4.793913000  | -0.820091000 |
| H  | -3.206891000 | 4.276708000  | 0.883620000  |
| H  | -1.737573000 | 5.105759000  | 0.364363000  |
| C  | -1.480650000 | -1.071066000 | 0.036326000  |
| C  | -0.011425000 | 0.053541000  | -1.406814000 |
| C  | -1.759019000 | 0.160749000  | 0.906591000  |
| C  | -0.634733000 | 1.261845000  | 0.770877000  |
| C  | 0.305691000  | 0.978523000  | -0.390719000 |
| O  | -1.158194000 | -0.724547000 | -1.310112000 |
| C  | -2.557888000 | -2.140028000 | 0.032668000  |
| H  | 0.285434000  | 0.185245000  | -2.441466000 |
| H  | -0.050842000 | 1.269476000  | 1.692241000  |
| H  | -0.593501000 | -1.555633000 | 0.483593000  |
| H  | -2.758032000 | -2.419203000 | 1.070136000  |
| H  | -2.184060000 | -3.013435000 | -0.511459000 |
| I  | 1.601793000  | 2.682681000  | -0.966177000 |
| O  | -3.018854000 | 0.760918000  | 0.574881000  |
| C  | -4.108000000 | 0.411790000  | 1.296579000  |
| C  | -5.330777000 | 1.092320000  | 0.751370000  |
| H  | -5.112535000 | 2.126300000  | 0.473501000  |
| H  | -5.638102000 | 0.550786000  | -0.150448000 |
| H  | -6.136415000 | 1.052808000  | 1.485222000  |
| O  | -4.085876000 | -0.369407000 | 2.228353000  |
| H  | -1.795894000 | -0.166066000 | 1.947943000  |
| O  | 2.118330000  | 0.817393000  | 2.877707000  |
| S  | 2.447053000  | -2.717589000 | -0.820345000 |
| O  | 3.555747000  | -3.418937000 | -0.050661000 |
| C  | 2.916598000  | -2.707114000 | -2.576692000 |
| H  | 3.784928000  | -2.052604000 | -2.677397000 |
| H  | 3.164910000  | -3.726781000 | -2.883533000 |
| H  | 2.081189000  | -2.310121000 | -3.158612000 |
| C  | 1.034841000  | -3.857994000 | -0.936033000 |
| H  | 0.261353000  | -3.386527000 | -1.546930000 |
| H  | 1.367666000  | -4.801998000 | -1.376379000 |
| H  | 0.664856000  | -4.017615000 | 0.078654000  |
| S  | 2.793933000  | -0.156409000 | 1.924538000  |
| C  | 4.497655000  | 0.412894000  | 1.649203000  |
| H  | 5.019047000  | -0.333035000 | 1.043223000  |

|   |             |              |             |
|---|-------------|--------------|-------------|
| H | 4.436979000 | 1.357646000  | 1.104844000 |
| H | 4.993083000 | 0.552030000  | 2.614091000 |
| C | 3.171104000 | -1.681810000 | 2.838359000 |
| H | 3.803716000 | -1.451700000 | 3.699854000 |
| H | 2.215317000 | -2.098095000 | 3.165746000 |
| H | 3.655169000 | -2.376145000 | 2.145616000 |

### TS1<sub>2a</sub>

|    |              |              |              |
|----|--------------|--------------|--------------|
| Pd | 1.731586267  | -0.494143918 | -0.229739839 |
| C  | -5.703878798 | -3.451136381 | -0.325603269 |
| C  | -5.498387418 | -2.095056508 | -0.950680062 |
| O  | -6.390565761 | -1.439462857 | -1.450674821 |
| O  | -4.249588463 | -1.567414587 | -0.956151681 |
| H  | -6.718122827 | -3.783529339 | -0.545428907 |
| H  | -4.983453996 | -4.184136837 | -0.699977176 |
| H  | -5.578620056 | -3.385784362 | 0.760679066  |
| C  | -2.052328763 | 4.321334675  | 0.575437596  |
| C  | -1.750613803 | 2.941216919  | 0.049433423  |
| O  | -1.901483285 | 2.580565008  | -1.095403473 |
| O  | -1.264655921 | 2.174083229  | 1.062123447  |
| H  | -2.461341156 | 4.937963338  | -0.225142786 |
| H  | -2.769065183 | 4.259557247  | 1.400195312  |
| H  | -1.137036376 | 4.778555311  | 0.964820631  |
| C  | -1.981974028 | -1.291375382 | -0.153221800 |
| C  | -0.429244889 | -0.111111462 | -1.444699579 |
| C  | -2.192292928 | -0.123006182 | 0.813263171  |
| C  | -0.907130018 | 0.787977235  | 0.875117361  |
| C  | -0.004914056 | 0.505783114  | -0.300992505 |
| O  | -1.575902601 | -0.848601480 | -1.460615701 |
| C  | -3.153716510 | -2.242768706 | -0.313149938 |
| H  | 0.032255255  | -0.018496825 | -2.420488953 |
| H  | -0.383348623 | 0.561956239  | 1.803809637  |
| H  | -1.156652125 | -1.886916395 | 0.271260116  |
| H  | -3.437520630 | -2.599064452 | 0.680124853  |
| H  | -2.839824087 | -3.094269034 | -0.925060919 |
| I  | 1.760823204  | 2.297906700  | -0.827018567 |
| O  | -3.313718538 | 0.679442447  | 0.434462598  |
| C  | -4.507231890 | 0.431920285  | 1.025955838  |
| C  | -5.573556941 | 1.304417939  | 0.429936428  |
| H  | -5.191560210 | 2.305484481  | 0.216858069  |
| H  | -5.884777141 | 0.843610634  | -0.514539840 |
| H  | -6.431882650 | 1.353181903  | 1.101015709  |
| O  | -4.677500719 | -0.409789318 | 1.886113490  |
| H  | -2.372585469 | -0.534124617 | 1.809180977  |
| O  | 1.192515250  | -0.011634599 | 3.256042388  |
| S  | 3.655118431  | -1.726961385 | -0.881541049 |
| O  | 4.510063544  | -2.372589924 | 0.201053043  |
| C  | 4.727530803  | -0.634958162 | -1.855244412 |
| H  | 5.024465260  | 0.189326045  | -1.203774417 |
| H  | 5.601929890  | -1.199313162 | -2.190321007 |
| H  | 4.157245414  | -0.249429799 | -2.704050487 |
| C  | 3.322839485  | -2.984966997 | -2.148529885 |
| H  | 2.789225317  | -2.511416803 | -2.976708779 |
| H  | 4.271595363  | -3.413654810 | -2.482652775 |
| H  | 2.694232762  | -3.750540926 | -1.688731668 |
| S  | 2.145861958  | -0.678606204 | 2.272255166  |
| C  | 3.834473889  | -0.128521674 | 2.654938356  |
| H  | 4.517622683  | -0.694539287 | 2.016113502  |
| H  | 3.888665264  | 0.936784905  | 2.421068873  |
| H  | 4.042550712  | -0.302915526 | 3.714442502  |

|   |             |              |             |
|---|-------------|--------------|-------------|
| C | 2.337056032 | -2.422046179 | 2.746880919 |
| H | 2.655882435 | -2.484479178 | 3.790929031 |
| H | 1.366066718 | -2.904054955 | 2.611901514 |
| H | 3.078679843 | -2.862105820 | 2.074424453 |

### C<sub>2a</sub>

|    |              |              |              |
|----|--------------|--------------|--------------|
| Pd | -1.663664000 | 0.073332000  | -0.419693000 |
| C  | 7.250386000  | 0.511938000  | -0.937462000 |
| C  | 6.234236000  | -0.543070000 | -0.580293000 |
| O  | 6.516475000  | -1.598668000 | -0.048233000 |
| O  | 4.931373000  | -0.307154000 | -0.861424000 |
| H  | 8.247518000  | 0.097927000  | -0.789415000 |
| H  | 7.138207000  | 0.849609000  | -1.971887000 |
| H  | 7.127514000  | 1.385167000  | -0.287478000 |
| C  | -0.738063000 | 1.205312000  | 3.458882000  |
| C  | 0.035794000  | 0.625695000  | 2.301239000  |
| O  | 0.238336000  | -0.555398000 | 2.127268000  |
| O  | 0.428390000  | 1.626129000  | 1.470703000  |
| H  | -0.811616000 | 0.467933000  | 4.258831000  |
| H  | -0.273653000 | 2.122519000  | 3.828885000  |
| H  | -1.746066000 | 1.458924000  | 3.110529000  |
| C  | 2.997708000  | 1.091279000  | -1.259004000 |
| C  | 1.023721000  | -0.174169000 | -1.721265000 |
| C  | 2.506731000  | 1.183457000  | 0.192571000  |
| C  | 0.994561000  | 1.418446000  | 0.146440000  |
| C  | 0.313227000  | 0.399240000  | -0.741892000 |
| O  | 2.363505000  | 0.025623000  | -1.976478000 |
| C  | 4.499358000  | 0.943275000  | -1.429150000 |
| H  | 0.615216000  | -0.891059000 | -2.424054000 |
| H  | 0.852280000  | 2.408191000  | -0.292367000 |
| H  | 2.734445000  | 2.046398000  | -1.738199000 |
| H  | 4.984437000  | 1.792382000  | -0.940981000 |
| H  | 4.742476000  | 0.958464000  | -2.496586000 |
| I  | -1.313334000 | -2.633251000 | -0.597018000 |
| O  | 2.778705000  | -0.031284000 | 0.900835000  |
| C  | 3.828803000  | -0.052302000 | 1.751940000  |
| C  | 4.042308000  | -1.439329000 | 2.285733000  |
| H  | 3.090115000  | -1.948443000 | 2.447602000  |
| H  | 4.613699000  | -1.993224000 | 1.532044000  |
| H  | 4.621486000  | -1.399207000 | 3.209233000  |
| O  | 4.515939000  | 0.917674000  | 2.010893000  |
| H  | 3.001440000  | 2.019502000  | 0.691710000  |
| O  | -0.953648000 | 3.156390000  | -1.566881000 |
| S  | -3.934301000 | -0.269035000 | 0.468595000  |
| O  | -4.748715000 | 0.984941000  | 0.743825000  |
| C  | -3.752945000 | -1.152888000 | 2.036994000  |
| H  | -3.135712000 | -0.526715000 | 2.684573000  |
| H  | -4.749999000 | -1.290681000 | 2.462817000  |
| H  | -3.258519000 | -2.108262000 | 1.854181000  |
| C  | -4.986447000 | -1.423638000 | -0.443297000 |
| H  | -4.469035000 | -2.379554000 | -0.538281000 |
| H  | -5.923892000 | -1.528181000 | 0.108455000  |
| H  | -5.162918000 | -0.988230000 | -1.429143000 |
| S  | -2.015641000 | 2.376520000  | -0.835917000 |
| C  | -2.426315000 | 3.241857000  | 0.698170000  |
| H  | -3.243798000 | 2.701806000  | 1.180470000  |
| H  | -1.523660000 | 3.230570000  | 1.310210000  |
| H  | -2.717211000 | 4.264697000  | 0.444386000  |
| C  | -3.564378000 | 2.540100000  | -1.758465000 |
| H  | -3.712995000 | 3.605216000  | -1.953814000 |

|   |              |             |              |
|---|--------------|-------------|--------------|
| H | -3.444162000 | 1.986494000 | -2.691617000 |
| H | -4.376257000 | 2.129808000 | -1.156021000 |

## 7. Characterization data of products

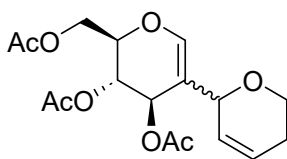

**4a**

The compound was synthesized according to the general procedure (1), affording **4a**, and purified by column chromatography giving a light yellowish sticky solid (34.3 mg, 77% yield).  $R_f$  (Hexane/ EtOAc = 70/30): 0.65;  $^1\text{H NMR}$  (600 MHz,  $\text{CDCl}_3$ )  $\delta$  6.53 (s, 1H), 6.45 (s, 1H), 5.94 – 5.90 (m, 1H), 5.81 – 5.77 (m, 1H), 5.58 – 5.50 (m, 4H), 5.14 – 5.11 (m, 1H), 5.04 (t,  $J = 4.3$  Hz, 1H), 4.52 (s, 1H), 4.49 (s, 1H), 4.38 – 4.33 (m, 2H), 4.29 (dd,  $J = 7.3, 3.7$  Hz, 1H), 4.24 (dt,  $J = 9.6, 4.9$  Hz, 1H), 4.14 (d,  $J = 3.4$  Hz, 0.5H), 4.11 (t,  $J = 3.1$  Hz, 1H), 4.09 (d,  $J = 3.6$  Hz, 0.5H), 3.88 – 3.84 (m, 1H), 3.70 (td,  $J = 6.9, 3.5$  Hz, 1H), 3.59 (dq,  $J = 8.5, 4.6$  Hz, 2H), 2.12 – 2.06 (m, 2H), 2.03 – 2.01 (m, 9H), 1.99 (d,  $J = 2.8$  Hz, 6H), 1.94 (s, 3H) 1.87 (dd,  $J = 23.3, 19.8$  Hz, 2H).  $^{13}\text{C NMR}$  (151 MHz,  $\text{CDCl}_3$ )  $\delta$  169.6, 169.5, 169.2, 168.9, 168.7, 168.6, 144.8, 144.1, 127.2, 126.4, 125.3, 124.4, 109.2, 108.9, 72.8, 72.6, 71.8, 68.8, 66.5, 66.4, 64.7, 63.8, 61.4, 60.4, 60.2, 58.9, 24.2, 23.8, 19.9, 19.9, 19.8, 19.7, 19.7. **HRMS (ESI)**  $m/z$ :  $[\text{M}+\text{H}]^+$  calcd for  $\text{C}_{17}\text{H}_{23}\text{O}_8$  355.1387; found 355.1383.

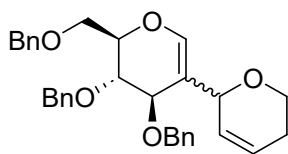

**4b**

The compound was synthesized according to the general procedure (1), affording **4b**, and purified by column chromatography giving a brownish oil (31.6 mg, 69% yield).  $R_f$  (Hexane/ EtOAc = 80/20): 0.50;  $^1\text{H NMR}$  (600 MHz,  $\text{CDCl}_3$ )  $\delta$  7.20 – 7.14 (m, 28H), 6.44 (s, 1H), 6.29 (s, 0.83H), 5.85 – 5.79 (m, 0.63H), 5.69 (ddd,  $J = 9.5, 4.4, 2.3$  Hz, 1.28H), 5.62 – 5.56 (m, 2H), 4.62 – 4.50

(m, 4.81H), 4.39 (ddd,  $J = 12.4, 10.3, 6.0$  Hz, 7.46H), 4.27 – 4.23 (m, 1.18H), 4.17 – 4.10 (m, 2.36H), 3.93 (d,  $J = 3.0$  Hz, 1.43H), 3.89 – 3.85 (m, 1.30H), 3.81 (dd,  $J = 11.1, 5.7$  Hz, 1H), 3.72 – 3.67 (m, 3H), 3.60 – 3.54 (m, 3.45H), 2.14 – 2.07 (m, 1.87H), 1.86 (ddd,  $J = 13.5, 6.7, 2.5$  Hz, 1.81H).  $^{13}\text{C}$  NMR (151 MHz,  $\text{CDCl}_3$ )  $\delta$  144.9, 143.9, 142.1, 138.6, 138.5, 138.4, 138.2, 138.2, 138.1, 138.1, 128.5, 128.5, 128.5, 128.5, 128.4, 128.4, 128.0, 127.9, 127.9, 127.9, 127.9, 127.8, 127.7, 127.6, 127.2, 126.6, 124.4, 112.3, 111.6, 76.7, 75.9, 75.8, 73.9, 73.8, 73.5, 73.3, 73.2, 73.0, 72.8, 72.7, 72.1, 71.8, 69.7, 68.4, 68.3, 68.2, 66.4, 62.9, 59.3, 25.5, 25.2. HRMS (ESI)  $m/z$ :  $[\text{M}+\text{Na}]^+$  calcd for  $\text{C}_{32}\text{H}_{32}\text{O}_5\text{Na}^+$  521.2298; found 521.2296.

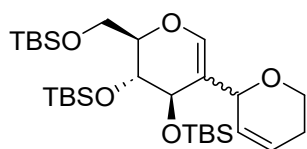

**4c**

The compound was synthesized according to the general procedure (1), affording **4c**, and purified by column chromatography giving a light yellowish sticky solid (31.6 mg, 68% yield).  $R_f$  (Hexane/EtOAc = 90/10): 0.45;  $^1\text{H}$  NMR (600 MHz,  $\text{CDCl}_3$ )  $\delta$  6.57 (s, 0.81H), 6.22 (s, 1H), 5.92 – 5.81 (m, 1.22H), 5.64 (d,  $J = 9.0$  Hz, 1.65H), 4.55 (s, 1.29H), 4.10 – 4.02 (m, 3H), 3.88 (t,  $J = 9.7$  Hz, 4.27H), 3.76 (d,  $J = 1.8$  Hz, 1.66H), 3.68 – 3.65 (m, 3.11H), 3.54 – 3.50 (m, 1.58H), 1.93 – 1.71 (m, 3.49H), 1.22 – 1.19 (m, 8.69H), 0.83 – 0.80 (m, 31H), -0.02 – -0.04 (m, 30.33H).  $^{13}\text{C}$  NMR (151 MHz,  $\text{CDCl}_3$ )  $\delta$  144.9, 142.3, 126.2, 125.3, 109.9, 78.9, 78.6, 73.2, 72.1, 69.6, 68.8, 68.2, 63.3, 60.6, 60.2, 59.4, 56.7, 30.4, 29.2, 27.9, 25.3, 25.2, 25.0, 24.9, 24.8, 24.7, 24.6, 17.5, 17.4, 17.3, 17.0, 16.9, 16.9, -4.1, -5.3, -5.3, -5.4, -5.6, -5.7, -5.7, -6.0, -6.1, -6.2, -6.3, -6.4. HRMS (ESI)  $m/z$ :  $[\text{M}+\text{Na}]^+$  calcd for  $\text{C}_{29}\text{H}_{58}\text{O}_5\text{NaSi}_3^+$  593.3484; found 593.3475.

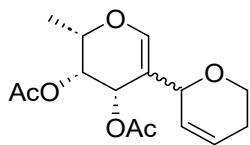

**4d**

The compound was synthesized according to the general procedure (1), affording **4d**, and purified by column chromatography giving a light yellowish gummy solid (30.1 mg, 69% yield).  $R_f$  (Hexane/EtOAc = 70/30): 0.50;  $^1\text{H}$  NMR (600 MHz,  $\text{CDCl}_3$ )  $\delta$  6.54 (s, 1H), 6.48 (s, 0.56H), 6.37

(s, 1H), 5.93 – 5.89 (m, 1H), 5.80 (d,  $J = 4.9$  Hz, 1H), 5.78 – 5.72 (m, 1.90H), 5.63 (dd,  $J = 19.1$ , 7.2 Hz, 2H), 5.30 – 5.25 (m, 2.43H), 4.63 (s, 1H), 4.23 (d,  $J = 6.5$  Hz, 1H), 4.17– 4.12 (m, 1.83H), 3.64– 3.60 (m, 3H), 2.12– 2.08 (m, 3.47H), 2.04 (s, 3.84H), 1.96 (s, 7H), 1.23– 1.20 (m, 5.07H).  $^{13}\text{C}$  NMR (151 MHz,  $\text{CDCl}_3$ )  $\delta$  169.9, 169.1, 168.7, 168.5, 138.4, 133.4, 125.8, 125.5, 123.7, 123.5, 91.3, 71.2, 70.8, 67.9, 65.4, 63.9, 63.5, 61.8, 29.9, 19.7, 19.6, 19.6, 19.4, 15.4, 15.1. HRMS (ESI)  $m/z$ :  $[\text{M}+\text{H}]^+$  calcd for  $\text{C}_{15}\text{H}_{21}\text{O}_6^+$  297.1333; found 297.1327.

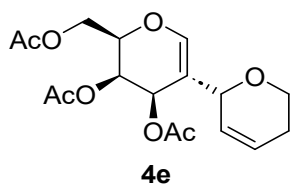

The compound was synthesized according to the general procedure (1), affording **4e**, and purified by column chromatography giving a brownish sticky solid (35.6 mg, 80% yield).  $R_f$  (Hexane/EtOAc = 70/30): 0.65;  $^1\text{H}$  NMR (600 MHz,  $\text{CDCl}_3$ )  $\delta$  6.53 (s, 1H), 5.75 – 5.70 (m, 1H), 5.67 – 5.62 (m, 2H), 5.37 – 5.31 (m, 1H), 4.30 (dd,  $J = 11.3$ , 8.1 Hz, 1H), 4.25 (dd,  $J = 7.8$ , 3.3 Hz, 1H), 4.20 – 4.17 (m, 1H), 4.15 (s, 2H), 3.93 (dd,  $J = 10.3$ , 2.5 Hz, 1H), 2.10 – 2.06 (m, 1H), 2.03 (s, 3H), 2.02 (s, 3H), 1.98 (s, 3H), 1.97 – 1.94 (m, 1H).  $^{13}\text{C}$  NMR (151 MHz,  $\text{CDCl}_3$ )  $\delta$  170.7, 170.4, 169.9, 142.5, 126.2, 123.8, 110.8, 72.5, 71.3, 66.2, 64.9, 63.3, 61.8, 30.6, 20.8, 20.8, 20.7. HRMS (ESI)  $m/z$ :  $[\text{M}+\text{Na}]^+$  calcd for  $\text{C}_{17}\text{H}_{22}\text{O}_8\text{Na}^+$  377.1207; found 377.1200.

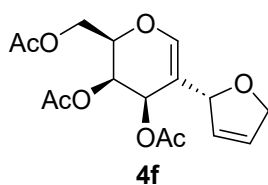

The compound was synthesized according to the general procedure (1), affording **4f**, and purified by column chromatography giving a light yellowish sticky solid (33.3 mg, 78% yield).  $R_f$  (Hexane/EtOAc = 70/30): 0.60;  $^1\text{H}$  NMR (600 MHz,  $\text{CDCl}_3$ )  $\delta$  6.46 (s, 1H), 5.82 – 5.79 (m, 1H), 5.61 (d,  $J = 4.3$  Hz, 2H), 5.31 (t,  $J = 4.4$  Hz, 1H), 5.13 (td,  $J = 4.2$ , 2.0 Hz, 1H), 4.63 – 4.58 (m, 1H), 4.52 – 4.49 (m, 1H), 4.40 (dd,  $J = 12.1$ , 8.9 Hz, 1H), 4.32 – 4.29 (m, 1H), 4.16 (dd,  $J = 12.1$ , 2.8 Hz, 1H), 2.02 (s, 3H), 2.00 (s, 3H), 1.93 (s, 3H).  $^{13}\text{C}$  NMR (151 MHz,  $\text{CDCl}_3$ )  $\delta$  169.8, 169.1, 168.5, 142.7, 127.0, 125.9, 109.5, 83.6, 74.5, 71.6, 64.8, 60.5, 60.4, 19.8, 19.7, 16.9. HRMS (ESI)  $m/z$ :  $[\text{M}+\text{Na}]^+$  calcd for  $\text{C}_{16}\text{H}_{20}\text{O}_8\text{Na}^+$  363.1050; found 363.1040.

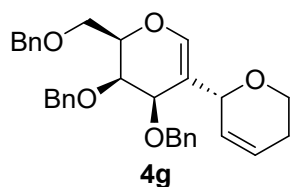

The compound was synthesized according to the general procedure (1), affording **4g**, and purified by column chromatography giving a colorless viscous solid (32.6 mg, 71% yield).  $R_f$  (Hexane/EtOAc = 80/20): 0.45;  $^1\text{H NMR}$  (600 MHz,  $\text{CDCl}_3$ )  $\delta$  7.28 – 7.16 (m, 15H), 6.31 (s, 1H), 5.74 (s, 1H), 5.75 – 5.58 (m, 1H), 4.81 (d,  $J = 12.0$  Hz, 1H), 4.60 (d,  $J = 11.9$  Hz, 1H), 4.54 (dd,  $J = 19.8$ , 11.9 Hz, 2H), 4.40 (d,  $J = 11.8$  Hz, 2H), 4.33 (d,  $J = 11.8$  Hz, 2H), 3.97 (t,  $J = 6.4$  Hz, 1H), 3.88 (d,  $J = 1.6$  Hz, 1H), 3.81 – 3.74 (m, 1H), 3.66 – 3.60 (m, 1H), 3.51 – 3.40 (m, 2H), 2.55 – 2.46 (m, 1H), 2.27 – 2.22 (m, 1H).  $^{13}\text{C NMR}$  (151 MHz,  $\text{CDCl}_3$ )  $\delta$  138.8, 138.5, 138.1, 133.2, 129.9, 128.4, 128.4, 128.3, 128.3, 128.3, 128.3, 128.2, 128.2, 127.9, 127.8, 127.7, 127.5, 127.4, 127.3, 125.2, 125.2, 92.7, 78.6, 75.2, 73.9, 73.6, 72.0, 70.5, 69.7, 62.9, 30.8. **HRMS (ESI)**  $m/z$ :  $[\text{M}+\text{Na}]^+$  calcd for  $\text{C}_{32}\text{H}_{34}\text{O}_5\text{Na}^+$  521.2298; found 521.2296.

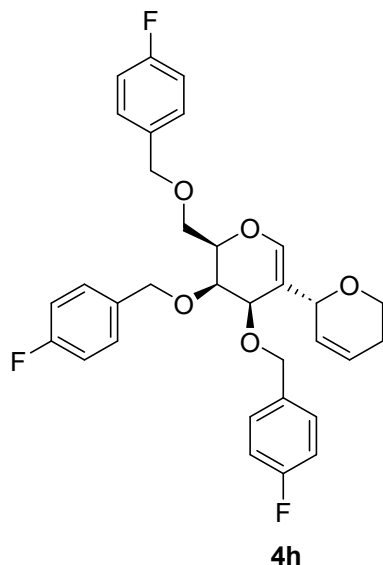

The compound was synthesized according to the general procedure (1), affording **4h**, and purified by column chromatography giving amber sticky solid (32.4 mg, 70% yield).  $R_f$  (Hexane/EtOAc = 80/20): 0.42;  $^1\text{H NMR}$  (600 MHz,  $\text{CDCl}_3$ )  $\delta$  7.19 – 7.13 (m, 6H), 6.95 – 6.89 (m, 6H), 6.33 (s, 1H), 5.74 – 5.68 (m, 1H), 5.65 – 5.61 (m, 1H), 4.68 (d,  $J = 10.9$  Hz, 1H), 4.60 (t,  $J = 11.9$  Hz, 1H), 4.53 (d,  $J = 11.7$  Hz, 1H), 4.46 (dd,  $J = 11.4$ , 5.1 Hz, 2H), 4.34 – 4.28 (m, 2H), 4.16 (s, 3H), 3.94 – 3.89 (m, 2H), 3.83 (dd,  $J = 11.0$ , 8.2 Hz, 1H), 3.67 (dd,  $J = 11.1$ , 3.0 Hz, 1H), 2.35 – 2.27 (m,

1H), 1.81 (dd,  $J = 17.2, 1.8$  Hz, 1H).  $^{13}\text{C}$  NMR (151 MHz,  $\text{CDCl}_3$ )  $\delta$  163.3, 163.0, 161.4, 141.5, 134.4, 133.9, 133.8, 129.6, 129.6, 129.5, 129.5, 129.4, 129.3, 125.9, 124.7, 115.4, 115.3, 115.3, 115.2, 115.1, 115.0, 112.7, 75.2, 74.6, 73.0, 72.9, 72.6, 71.9, 69.9, 67.7, 66.3, 31.0. HRMS (ESI)  $m/z$ :  $[\text{M}+\text{Na}]^+$  calcd for  $\text{C}_{32}\text{H}_{31}\text{F}_3\text{O}_5\text{Na}^+$  575.2016; found 575.2014.

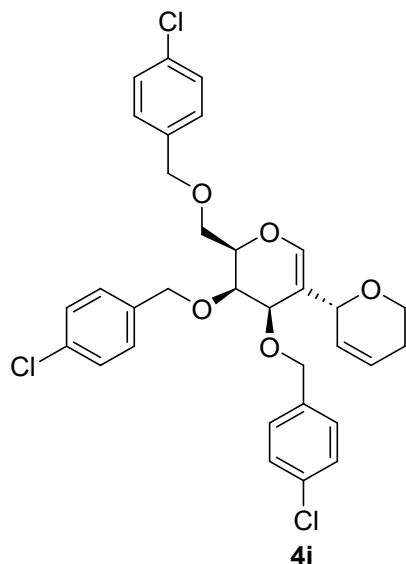

The compound was synthesized according to the general procedure (1), affording **4i**, and purified by column chromatography giving a light yellowish sticky solid (31.7 mg, 68% yield).  $R_f$  (Hexane/EtOAc = 80/20): 0.45;  $^1\text{H}$  NMR (600 MHz,  $\text{CDCl}_3$ )  $\delta$  7.20 – 7.13 (m, 6H), 2 6.9 – 6.90 (m, 6H), 6.35 (s, 1H), 5.77 – 5.69 (m, 1H), 5.67 – 5.60 (m, 1H), 4.66 (d,  $J = 10.3$  Hz, 1H), 4.61 (d,  $J = 11.7$  Hz, 1H), 4.53 (d,  $J = 11.7$  Hz, 1H), 4.46 (dd,  $J = 11.4, 5.1$  Hz, 2H), 4.34 – 4.28 (m, 2H), 4.16 (bs, 3H), 3.93 – 3.87 (m, 2H), 3.85 – 3.80 (m, 1H), 3.67 (dd,  $J = 11.1, 3.0$  Hz, 1H), 2.33 – 2.25 (m, 1H), 1.83 – 1.78 (m, 1H).  $^{13}\text{C}$  NMR (151 MHz,  $\text{CDCl}_3$ )  $\delta$  163.2, 161.6, 161.6, 141.6, 134.1, 134.0, 133.9, 129.3, 129.5, 129.5, 129.7, 129.6, 129.3, 126.0, 124.6, 115.1, 115.3, 115.3, 115.2, 115.1, 115.0, 112.8, 75.1, 74.8, 73.1, 72.9, 72.6, 71.9, 70.0, 67.5, 66., 431.1. HRMS (ESI)  $m/z$ :  $[\text{M}+\text{Na}]^+$  calcd for  $\text{C}_{32}\text{H}_{31}\text{Cl}_3\text{O}_5\text{Na}^+$  623.1129; found 623.1122.

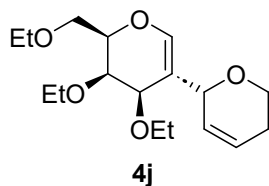

The compound was synthesized according to the general procedure (1), affording **4j**, and purified by column chromatography giving a light yellowish sticky solid (30.3 mg, 69% yield).  $R_f$  (Hexane/EtOAc = 80/20): 0.55;  $^1\text{H NMR}$  (600 MHz,  $\text{CDCl}_3$ )  $\delta$  6.23 (dd,  $J = 14.4, 6.3$  Hz, 1H), 6.17 (dd,  $J = 11.5, 1.8$  Hz, 1H), 5.72 (s, 1H), 4.09 (s, 1H), 3.92 (t,  $J = 6.5$  Hz, 1H), 3.79 (ddd,  $J = 13.7, 6.2, 3.6$  Hz, 2H), 3.73 – 3.68 (m, 2H), 3.64 – 3.59 (m, 2H), 3.57 – 3.54 (m, 2H), 3.47 – 3.44 (m, 4H), 2.48 (dd,  $J = 15.1, 8.0$  Hz, 1H), 2.26 – 2.21 (m, 1H), 1.17 – 1.14 (m, 6H), 1.09 (s, 3H).  $^{13}\text{C NMR}$  (151 MHz,  $\text{CDCl}_3$ )  $\delta$  132.7, 130.3, 125.3, 124.9, 92.5, 77.7, 75.9, 69.9, 69.4, 68.3, 66.9, 65.3, 62.9, 30.9, 15.3, 15.5, 15.2. **HRMS (ESI)**  $m/z$ :  $[\text{M}+\text{H}]^+$  calcd for  $\text{C}_{17}\text{H}_{29}\text{O}_5^+$  313.2010; found 313.2006.

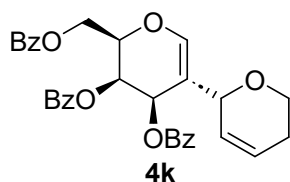

The compound was synthesized according to the general procedure (1), affording **4k**, and purified by column chromatography giving an amber sticky solid (29.6 mg, 64% yield).  $R_f$  (Hexane/EtOAc = 70/30): 0.45  $^1\text{H NMR}$  (600 MHz,  $\text{CDCl}_3$ )  $\delta$  8.04 (d,  $J = 7.1$  Hz, 2H), 7.96 – 7.95 (m, 2H), 7.89 (d,  $J = 1.2$  Hz, 1H), 7.83 (s, 1H), 7.54 (s, 1H), 7.47 (dd,  $J = 5.4, 1.9$  Hz, 2H), 7.40 (s, 3H), 7.34 (s, 2H), 7.28 (s, 1H), 6.71 (s, 1H), 6.08 (d,  $J = 4.4$  Hz, 1H), 5.81 – 5.78 (m, 1H), 5.69 (ddd,  $J = 10.0, 5.6, 2.1$  Hz, 1H), 5.61 – 5.58 (m, 1H), 4.89 – 4.86 (m, 1H), 4.66 – 4.61 (m, 1H), 4.52 – 4.49 (m, 1H), 4.13 (s, 2H), 4.04 – 4.01 (m, 1H), 2.18 – 2.13 (m, 1H), 2.09 – 2.06 (m, 1H).  $^{13}\text{C NMR}$  (151 MHz,  $\text{CDCl}_3$ )  $\delta$  166.5, 165.9, 165.3, 143.0, 133.8, 133.8, 133.7, 133.4, 133.4, 133.2, 130.2, 130.2, 130.2, 129.9, 129.8, 129.8, 128.6, 128.5, 128.5, 128.5, 128.5, 128.4, 126.1, 123.9, 111.0, 72.6, 71.5, 66.2, 66.0, 63.7, 62.5, 30.6. **HRMS (ESI)**  $m/z$ :  $[\text{M}+\text{Na}]^+$  calcd for  $\text{C}_{32}\text{H}_{28}\text{O}_8\text{Na}^+$  563.1676; found 563.1676.

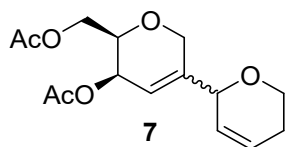

The compound was synthesized according to the general procedure (1), affording **7**, and purified by column chromatography giving a light red gummy liquid (27.0 mg, 62% yield).  $R_f$  (Hexane/

EtOAc = 70/30): 0.60;  $^1\text{H NMR}$  (600 MHz,  $\text{CDCl}_3$ )  $\delta$  5.94 – 5.88 (m, 0.23H), 5.76 (dd,  $J = 7.7$ , 5.4 Hz, 1H), 5.69 – 5.59 (m, 2.36H), 5.21 (d,  $J = 5.0$  Hz, 1.23H), 4.24 – 4.09 (m, 7.40H), 3.99 – 3.85 (m, 1.23H), 3.65 (dd,  $J = 8.3$ , 2.3 Hz, 1.26H), 2.22 – 2.12 (m, 1.22H), 2.04 (s, 3.67H), 2.01 (s, 3.79H), 1.99 – 1.92 (m, 1.24H).  $^{13}\text{C NMR}$  (151 MHz,  $\text{CDCl}_3$ )  $\delta$  170.9, 170.4, 142.1, 141.8, 126.3, 123.5, 118.8, 118.7, 74.1, 73.6, 73.2, 73.1, 66.2, 65.9, 65.5, 65.4, 64.9, 63.3, 29.3, 21.1, 20.9. **HRMS (ESI)**  $m/z$ :  $[\text{M}+\text{Na}]^+$  calcd for  $\text{C}_{15}\text{H}_{20}\text{O}_6\text{Na}^+$  319.1152; found 319.1150.

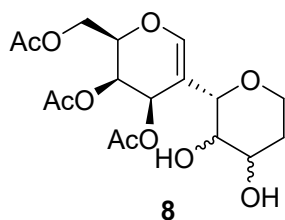

The compound was synthesized according to the general procedure (2), affording **8**, and purified by column chromatography giving a yellowish liquid (37.8 mg, 69% yield).  $R_f$  (Hexane/ EtOAc = 50/50): 0.50;  $^1\text{H NMR}$  (600 MHz,  $\text{CDCl}_3$ ) 5.60 (s, 0.60H), 5.59 (s, 1H), 5.57 (t,  $J = 5.0$  Hz, 1.65H), 5.51 – 5.49 (m, 1.78H), 4.34 (dd,  $J = 8.2$  Hz, 1.62H), 4.09 – 4.08 (m, 1.77H), 4.01 – 3.99 (m, 3.36H), 3.78 – 3.73 (m, 3.34H), 2.08 (bs, 5.62H), 2.05 (bs, 5.83H), 2.00 (s, 4.68H).  $^{13}\text{C NMR}$  (151 MHz,  $\text{CDCl}_3$ )  $\delta$  170.3, 169.8, 169.3, 159.5, 121.1, 78.8, 73.3, 69.3, 68.9, 68.7, 65.8, 62.1, 61.8, 30.5, 20.7, 20.6, 20.4. **HRMS (ESI)**  $m/z$ :  $[\text{M}+\text{Na}]^+$  calcd for  $\text{C}_{17}\text{H}_{24}\text{O}_{10}\text{Na}^+$  411.1262; found 411.1250.

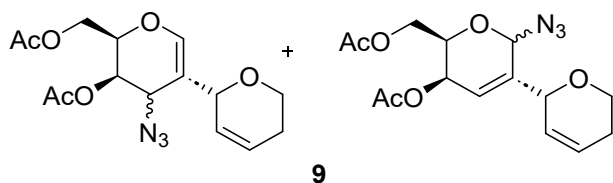

The compound was synthesized according to the general procedure (3), affording **9**, and purified by column chromatography giving beige sticky solid (39.1 mg, 82% yield).  $R_f$  (Hexane/ EtOAc = 70/30): 0.55;  $^1\text{H NMR}$  (600 MHz,  $\text{CDCl}_3$ )  $\delta$  6.66 (s, 0.71H), 6.59 (s, 1H), 6.04 – 5.96 (m, 1.73H), 5.79 (d,  $J = 4.2$  Hz, 2.85H), 5.67 (s, 1.89H), 5.06 – 5.02 (m, 2.33H), 4.96 (s, 1.76H), 4.18 (d,  $J = 6.9$  Hz, 12.54H), 4.10 – 4.07 (m, 1.62H), 2.27 – 2.14 (m, 4.24H), 2.04 – 2.00 (m, 14.14H).  $^{13}\text{C NMR}$  (151 MHz,  $\text{CDCl}_3$ )  $\delta$  169.7, 169.5, 169.3, 169.3, 168.9, 168.9, 143.5, 142.7, 140.8, 140.6, 125.4, 125.3, 125.2, 125.2, 122.5, 122.4, 119.2, 118.7, 108.5, 107.9, 83.8, 83.2, 71.7, 71.6, 70.2,

69.9, 68.9, 67.7, 67.5, 65.9, 65.9, 65.4, 65.2, 64.8, 61.8, 61.5, 61.5, 61.2, 53.1, 52.4, 29.5, 27.7, 27.2, 19.8, 19.7, 19.7. **HRMS (ESI)**  $m/z$ :  $[M+Na]^+$  calcd for  $C_{15}H_{19}N_3O_6Na^+$  360.1166; found 360.1160.

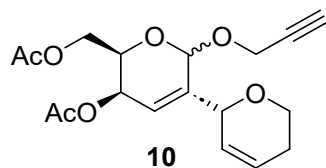

The compound was synthesized according to the general procedure (3), affording **10**, and purified by column chromatography giving a light yellowish gummy solid (41.5 mg, 84% yield).  $R_f$  (Hexane/ EtOAc = 70/30): 0.60;  **$^1H$  NMR (600 MHz,  $CDCl_3$ )**  $\delta$  6.12 (d,  $J$  = 5.6 Hz, 1H), 6.01 (d,  $J$  = 5.4 Hz, 1H), 5.77 (ddd,  $J$  = 9.3, 5.2, 2.2 Hz, 2H), 5.70 – 5.64 (m, 2H), 5.35 (s, 1H), 5.24 (s, 1H), 5.06 – 5.02 (m, 2H), 4.27 – 4.22 (m, 6H), 4.19 – 4.16 (m, 8H), 4.06 – 4.00 (m, 2H), 2.40 (d,  $J$  = 2.3 Hz, 2H), 2.20 – 2.09 (m, 4H), 2.01 – 2.00 (m, 12H).  **$^{13}C$  NMR (151 MHz,  $CDCl_3$ )**  $\delta$  169.6, 169.4, 169.3, 141.4, 141.2, 125.3, 125.1, 122.9, 122.7, 119.2, 118.4, 92.0, 90.9, 78.1, 77.9, 73.9, 73.7, 71.2, 70.4, 66.0, 65.8, 65.4, 65.2, 62.0, 61.9, 61.7, 61.7, 53.8, 53.5, 27.8, 19.9, 19.8. **HRMS (ESI)**  $m/z$ :  $[M+Na]^+$  calcd for  $C_{18}H_{22}O_7Na^+$  373.1258; found 373.1250.

### 8. NMR Spectra:

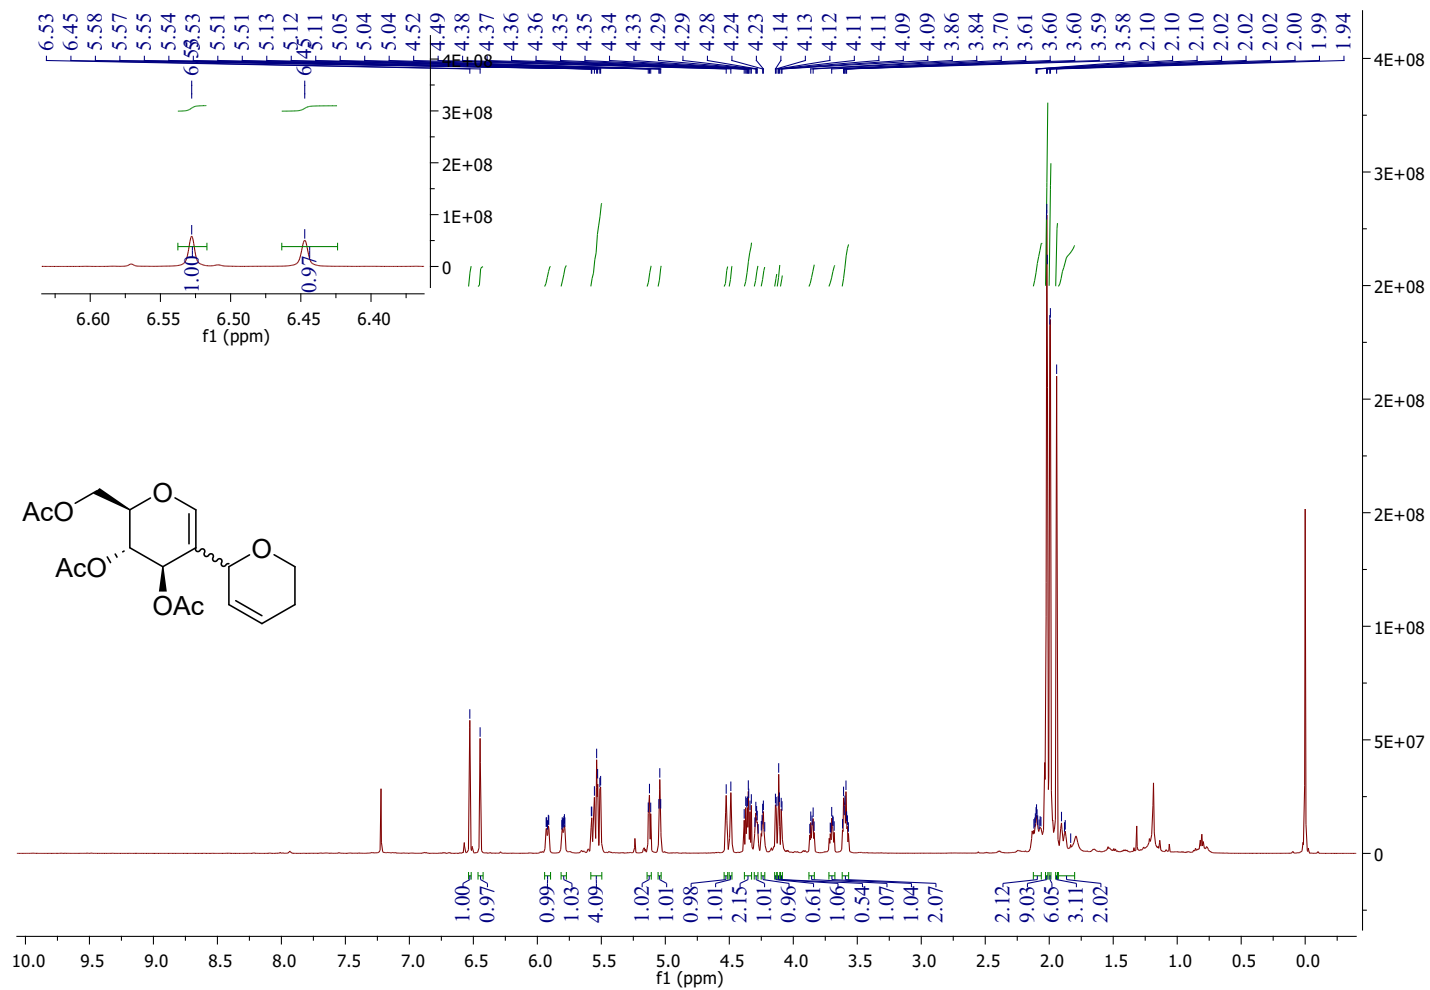

Fig.: <sup>1</sup>H NMR (600 MHz, CDCl<sub>3</sub>) of compound 4a

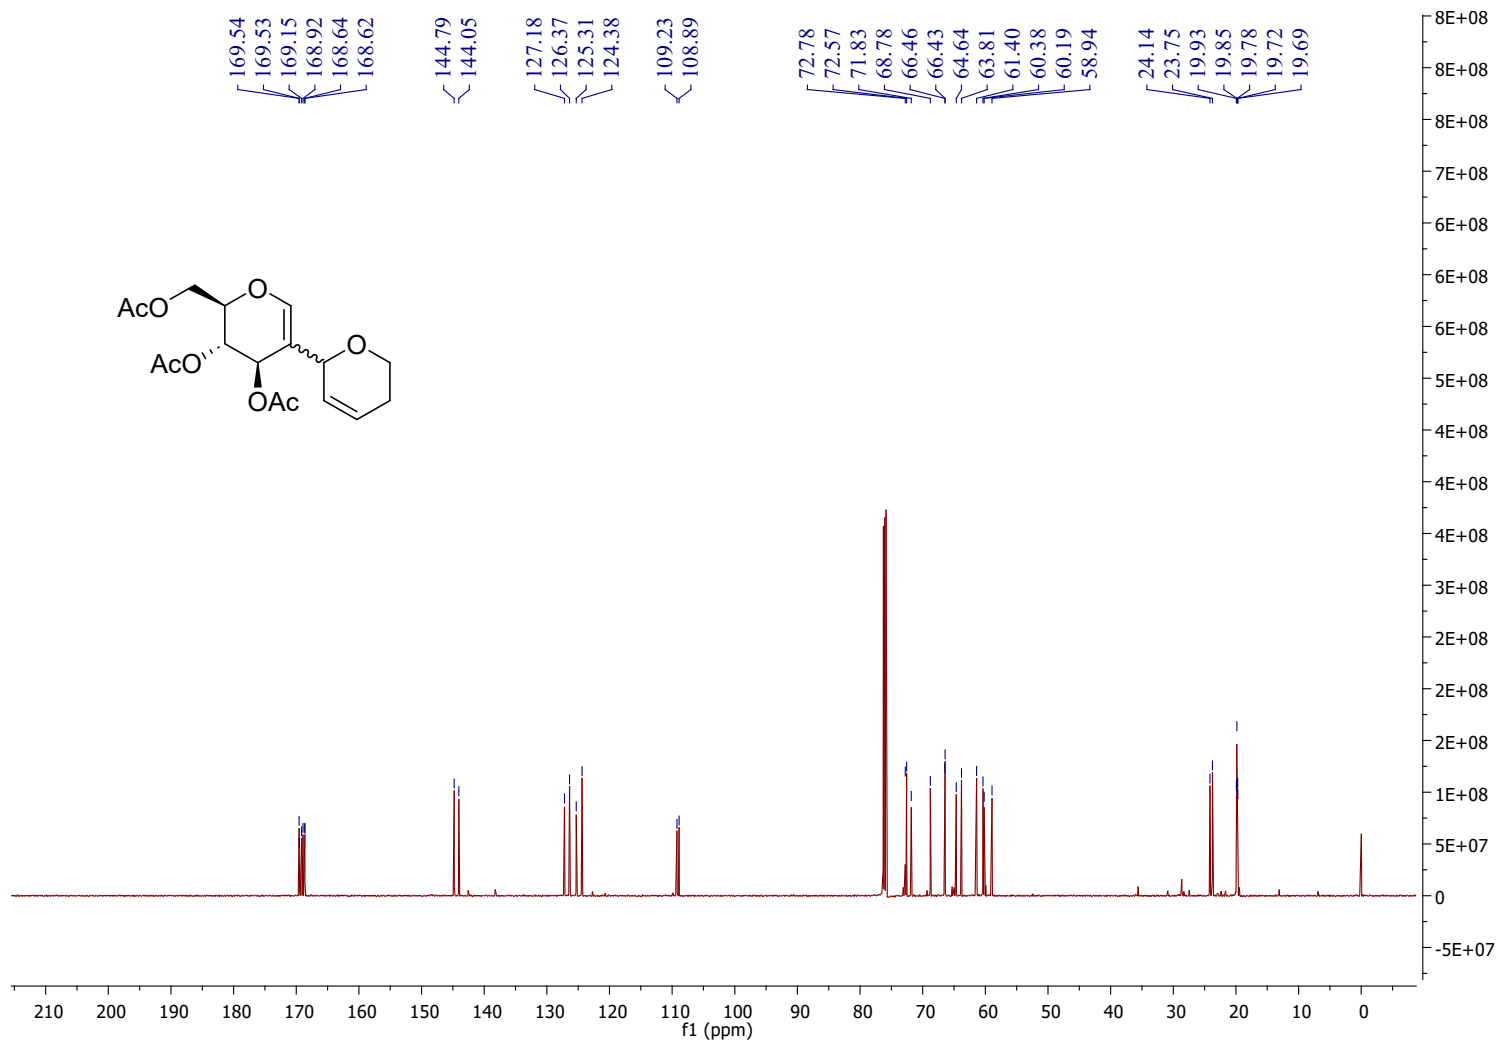

Fig.: <sup>13</sup>CNMR (151 MHz, CDCl<sub>3</sub>) of compound 4a

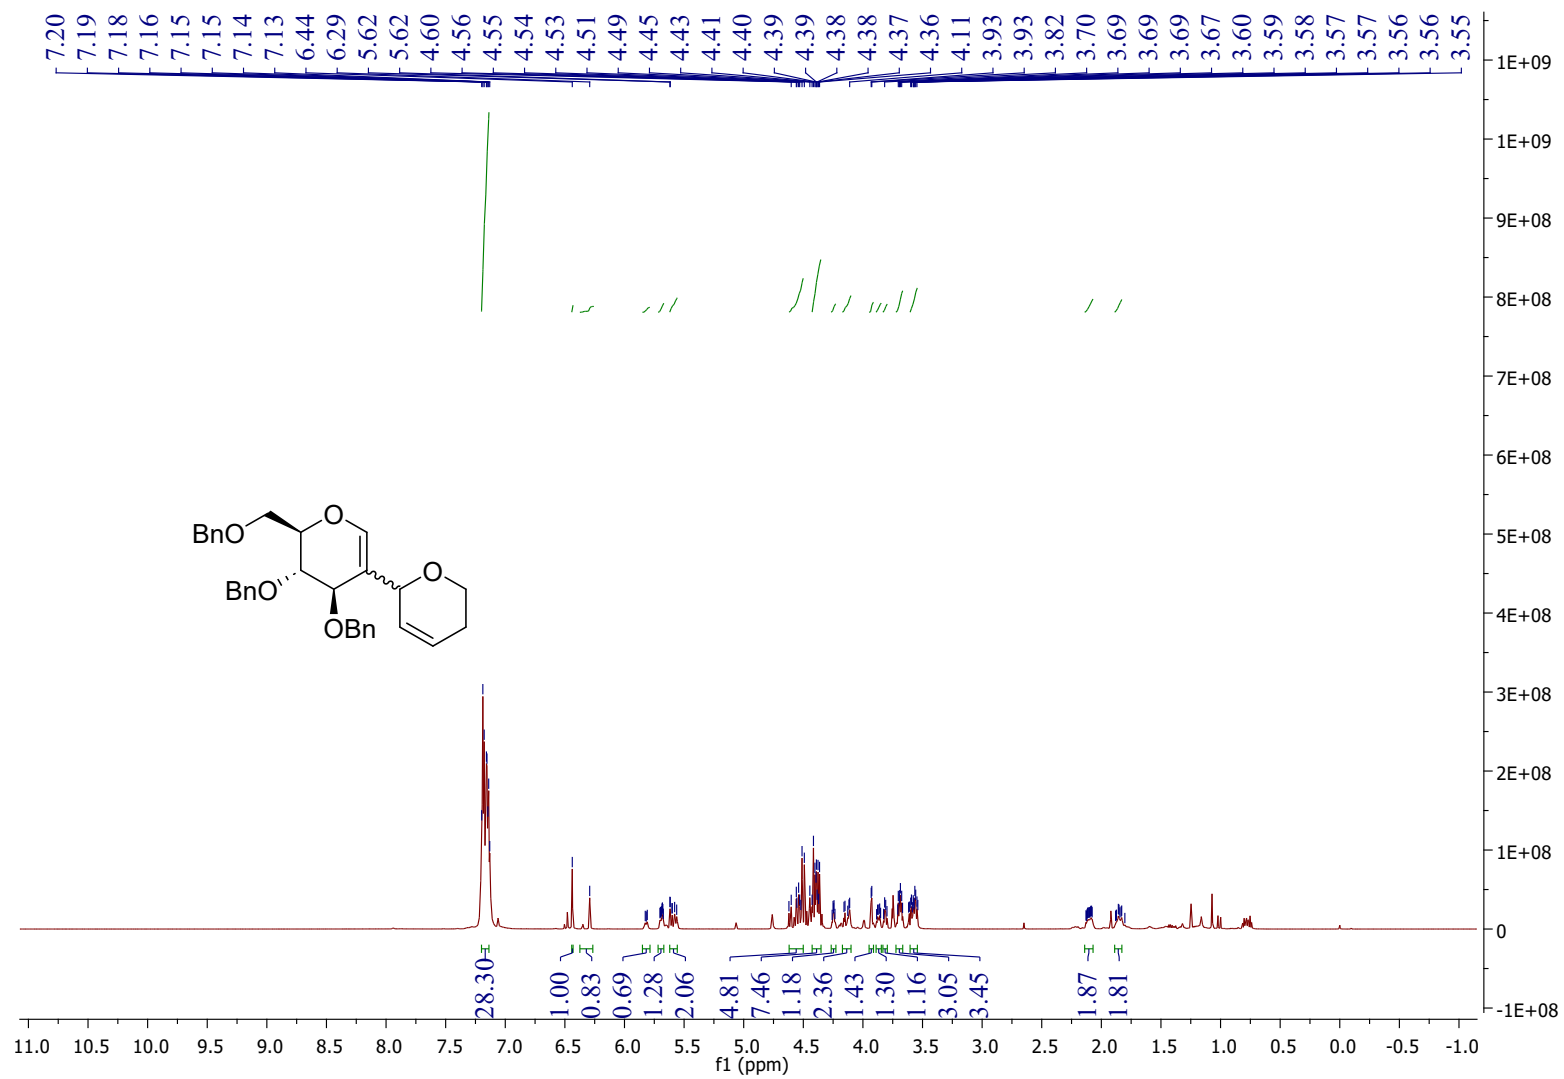

**Fig.:**  $^1\text{H NMR}$  (600 MHz,  $\text{CDCl}_3$ ) of compound **4b**

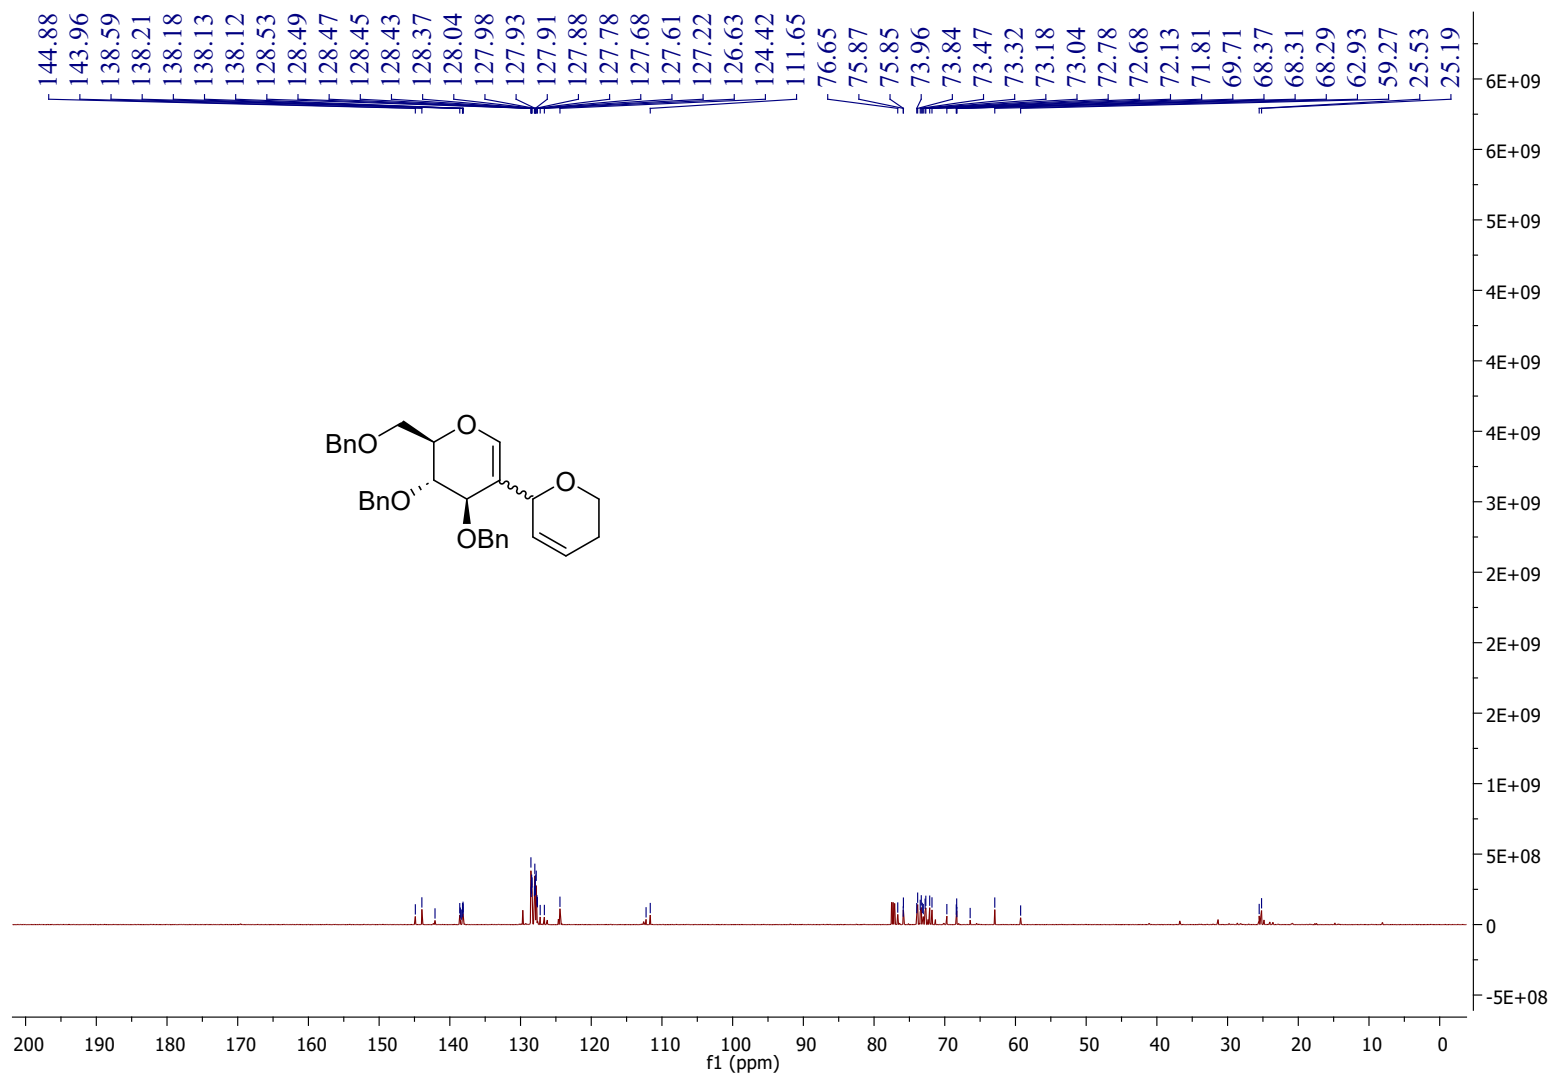

**Fig.:** <sup>13</sup>CNMR (151 MHz, CDCl<sub>3</sub>) of compound **4b**

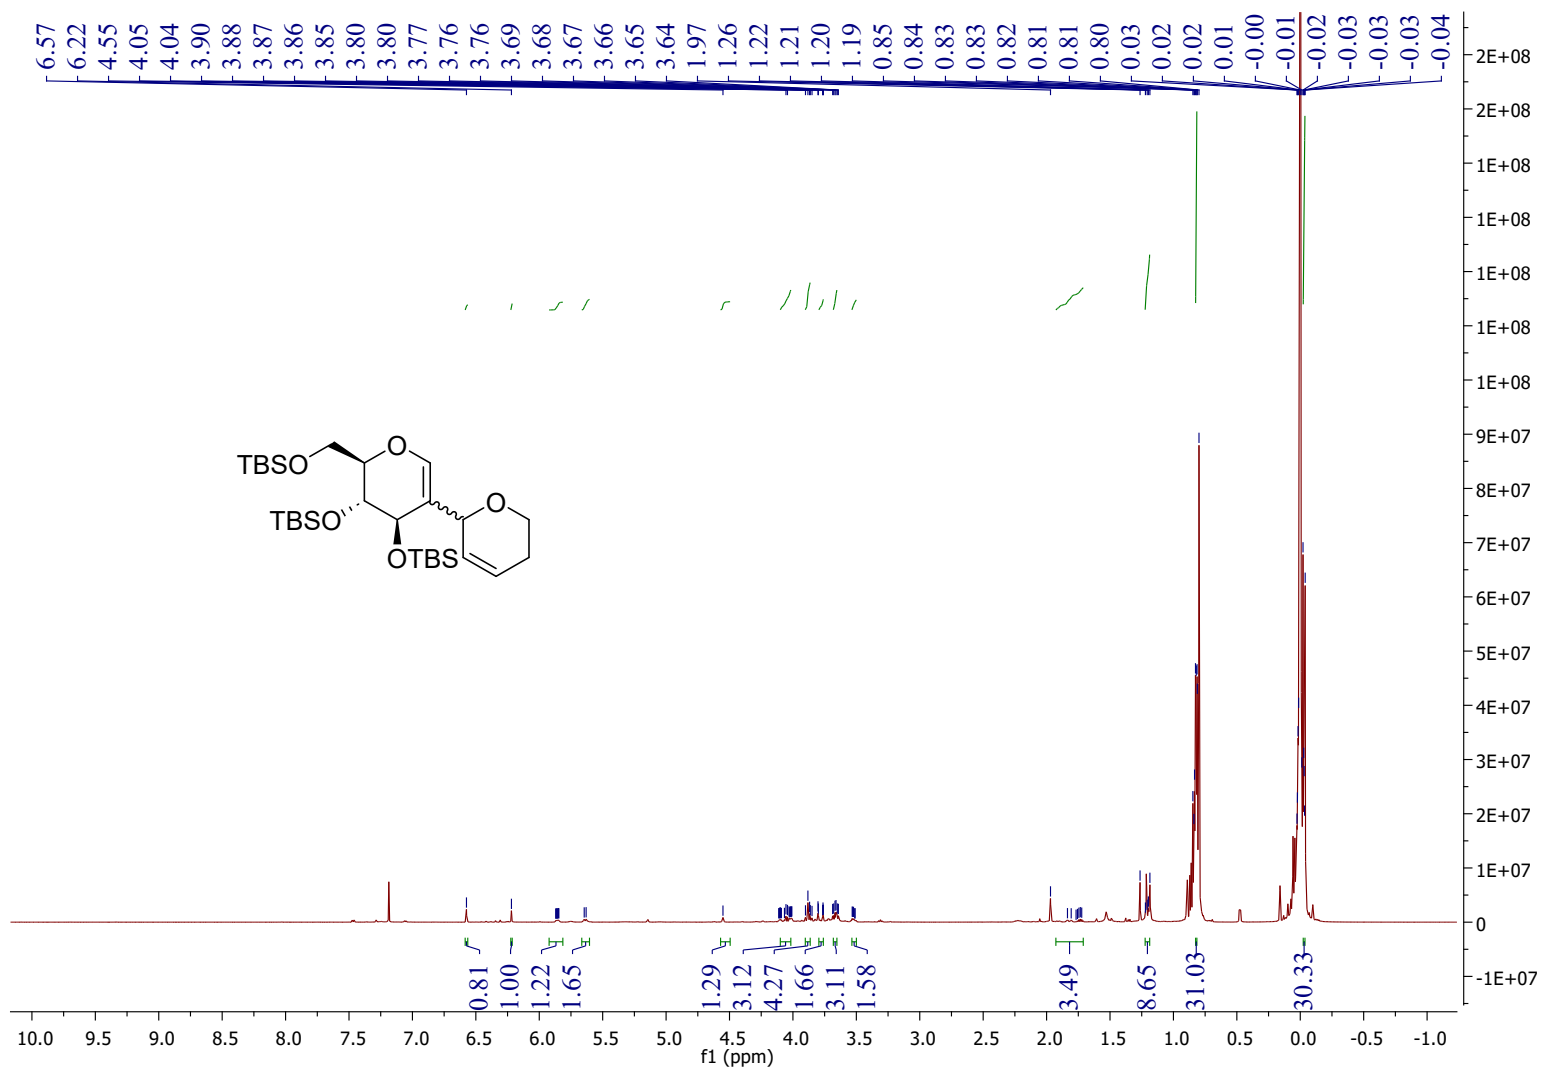

Fig.: <sup>1</sup>HNMR (600 MHz, CDCl<sub>3</sub>) of compound 4c

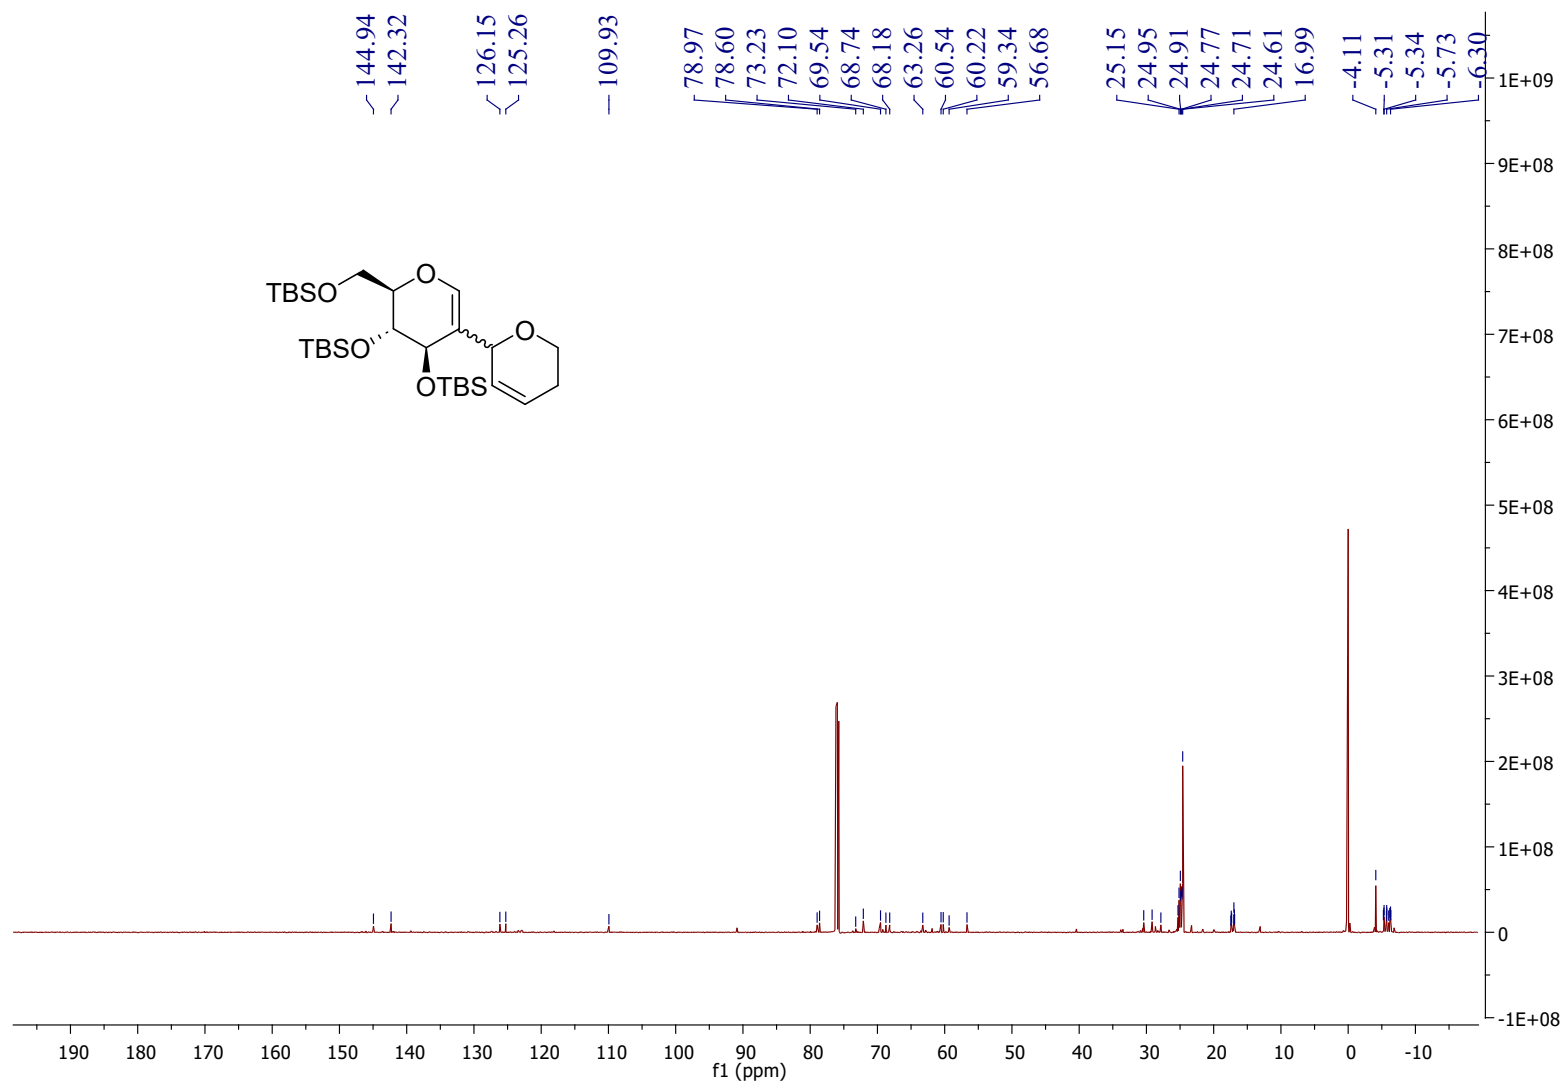

Fig.:  $^{13}\text{C}$ NMR (151 MHz,  $\text{CDCl}_3$ ) of compound 4c

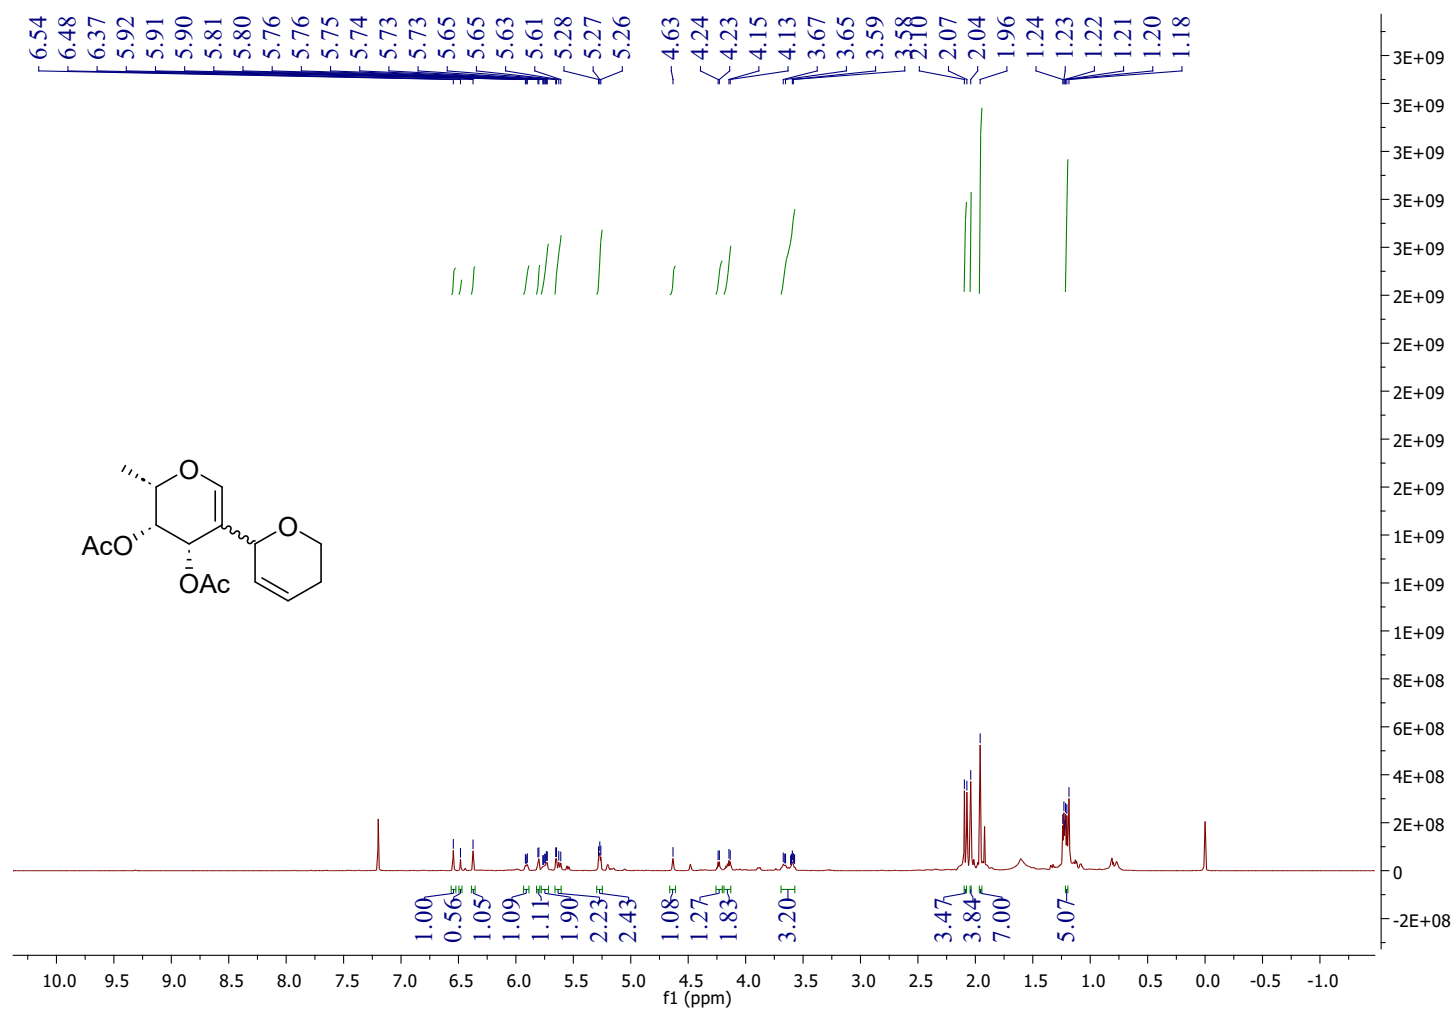

Fig.: <sup>1</sup>H NMR (600 MHz, CDCl<sub>3</sub>) of compound 4d

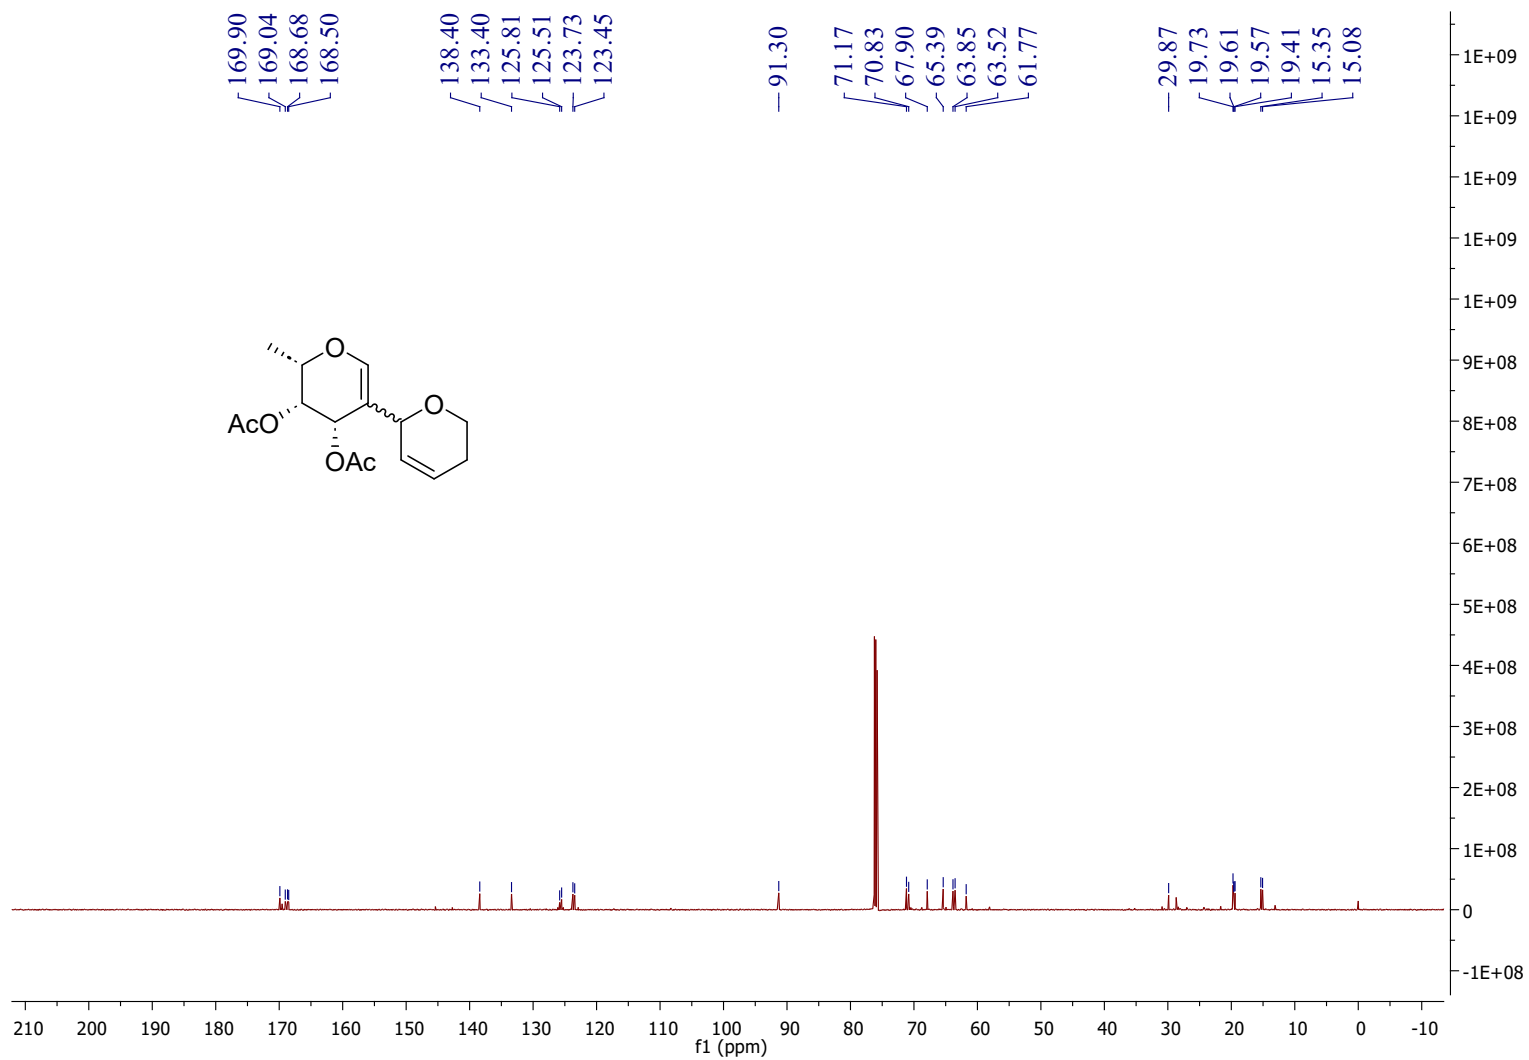

**Fig.:**  $^{13}\text{C}$ NMR (151 MHz,  $\text{CDCl}_3$ ) of compound **4d**

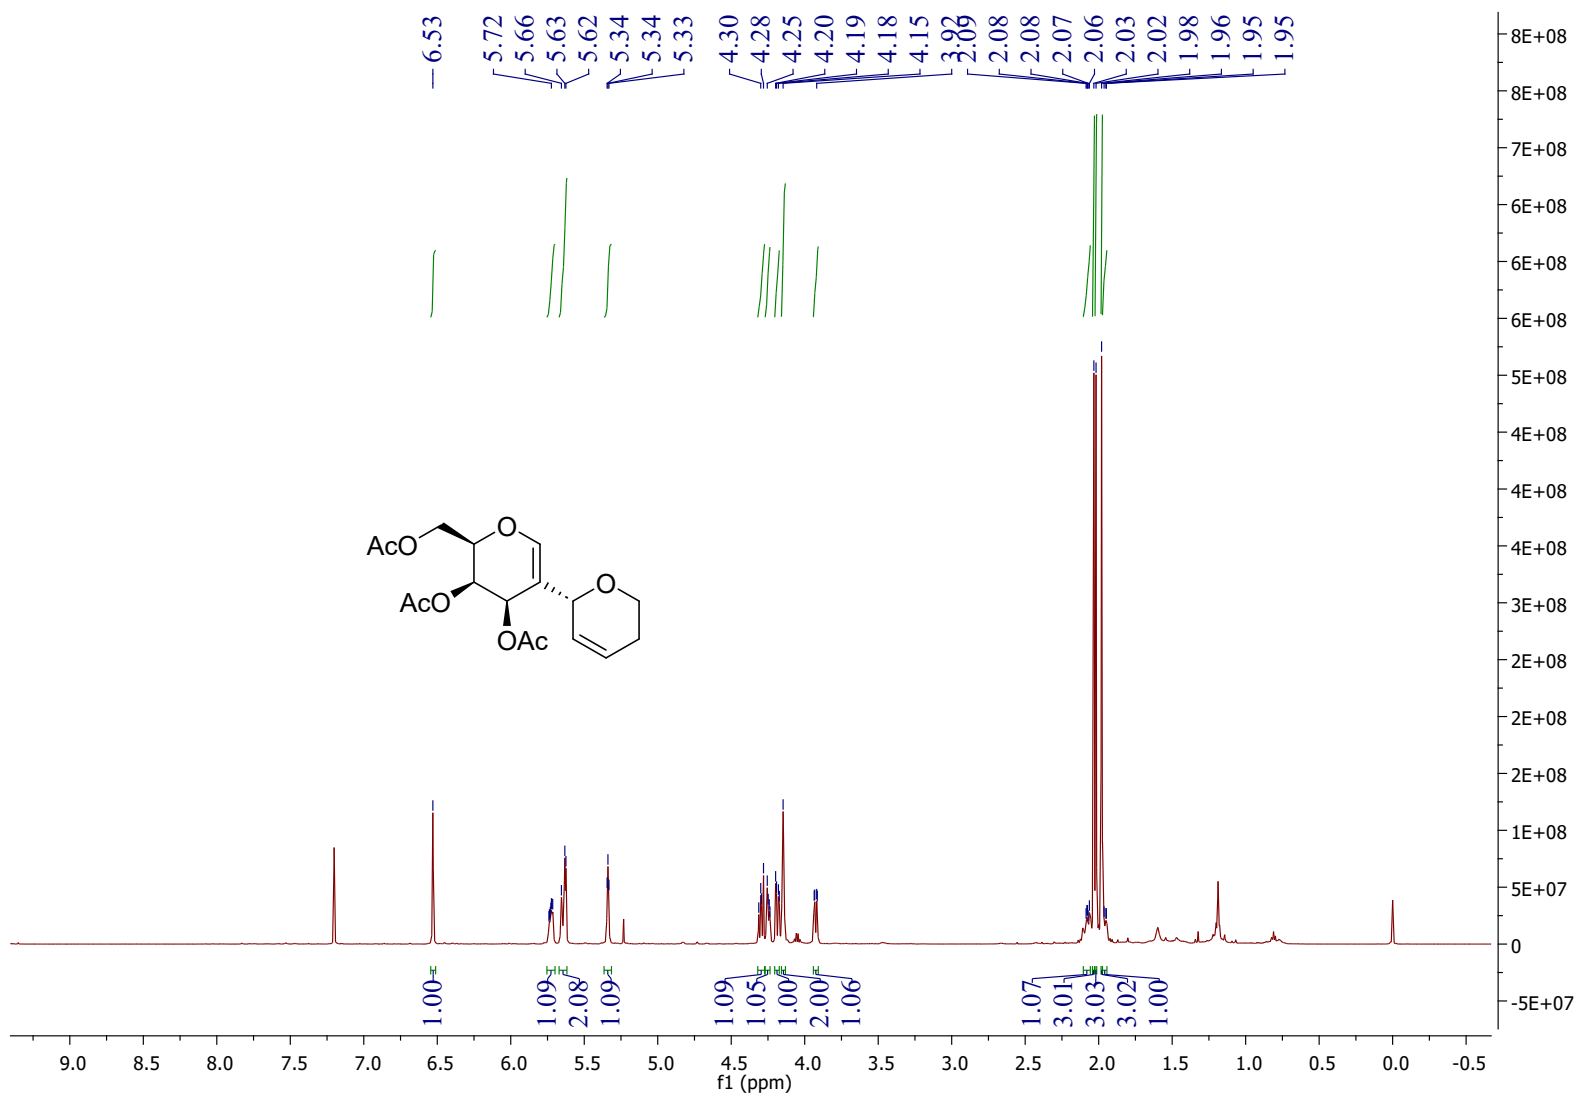

Fig.:  $^1\text{H}$ NMR (600 MHz,  $\text{CDCl}_3$ ) of compound 4e

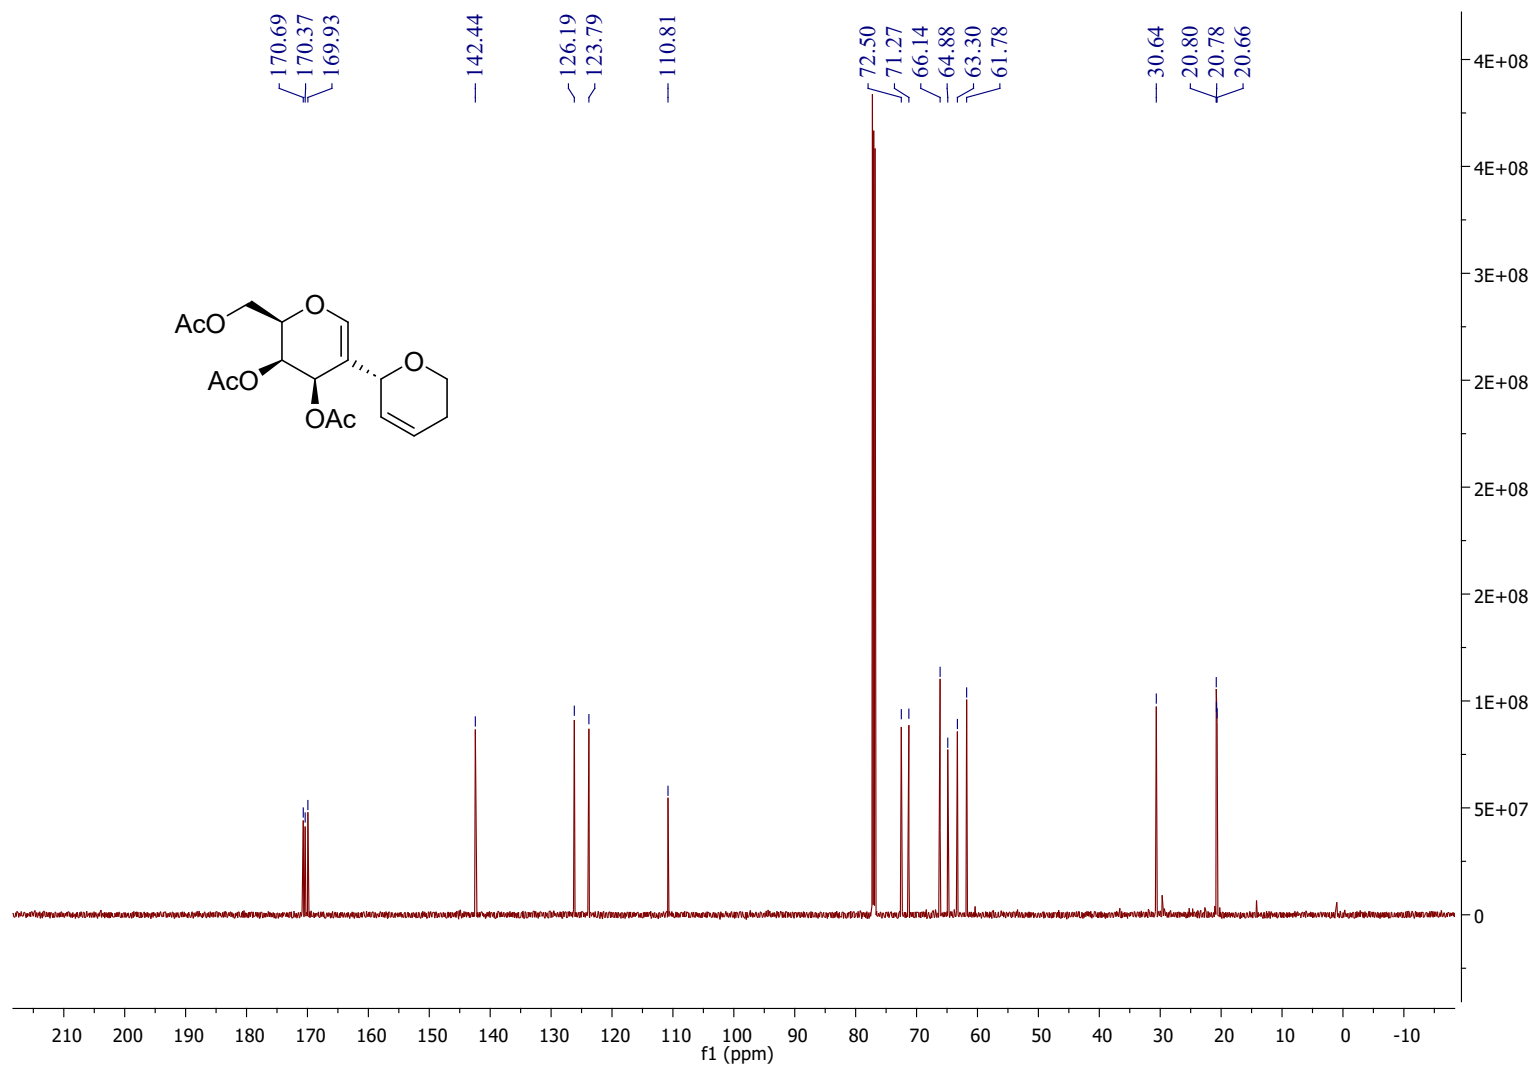

Fig.:  $^{13}\text{C}$ NMR (151 MHz,  $\text{CDCl}_3$ ) of compound 4e

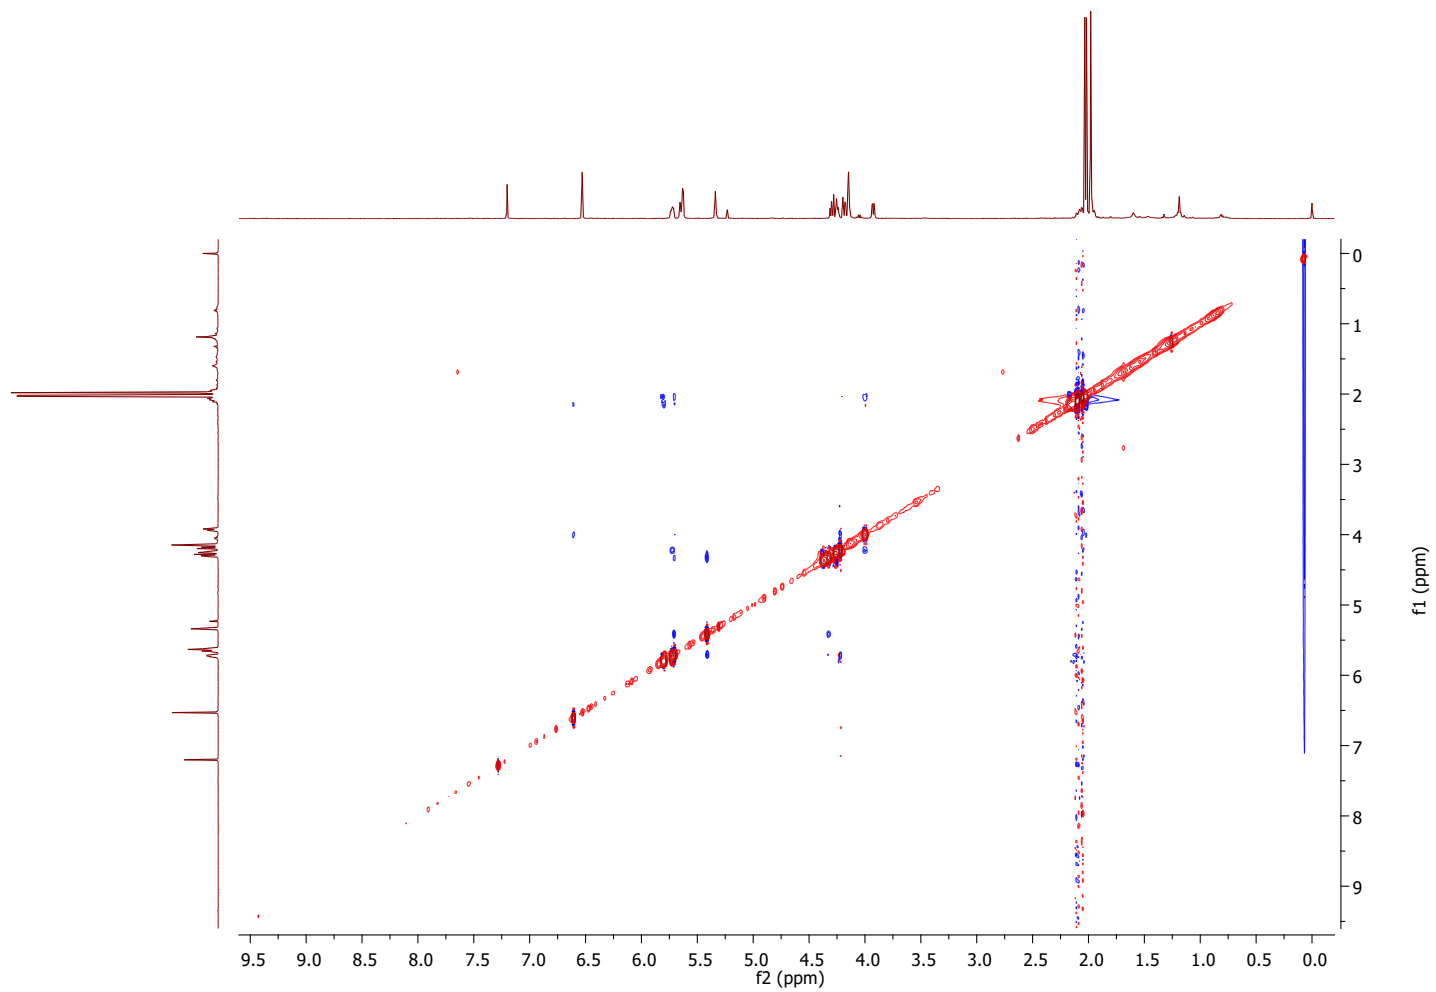

Fig.: NOESY of compound 4e

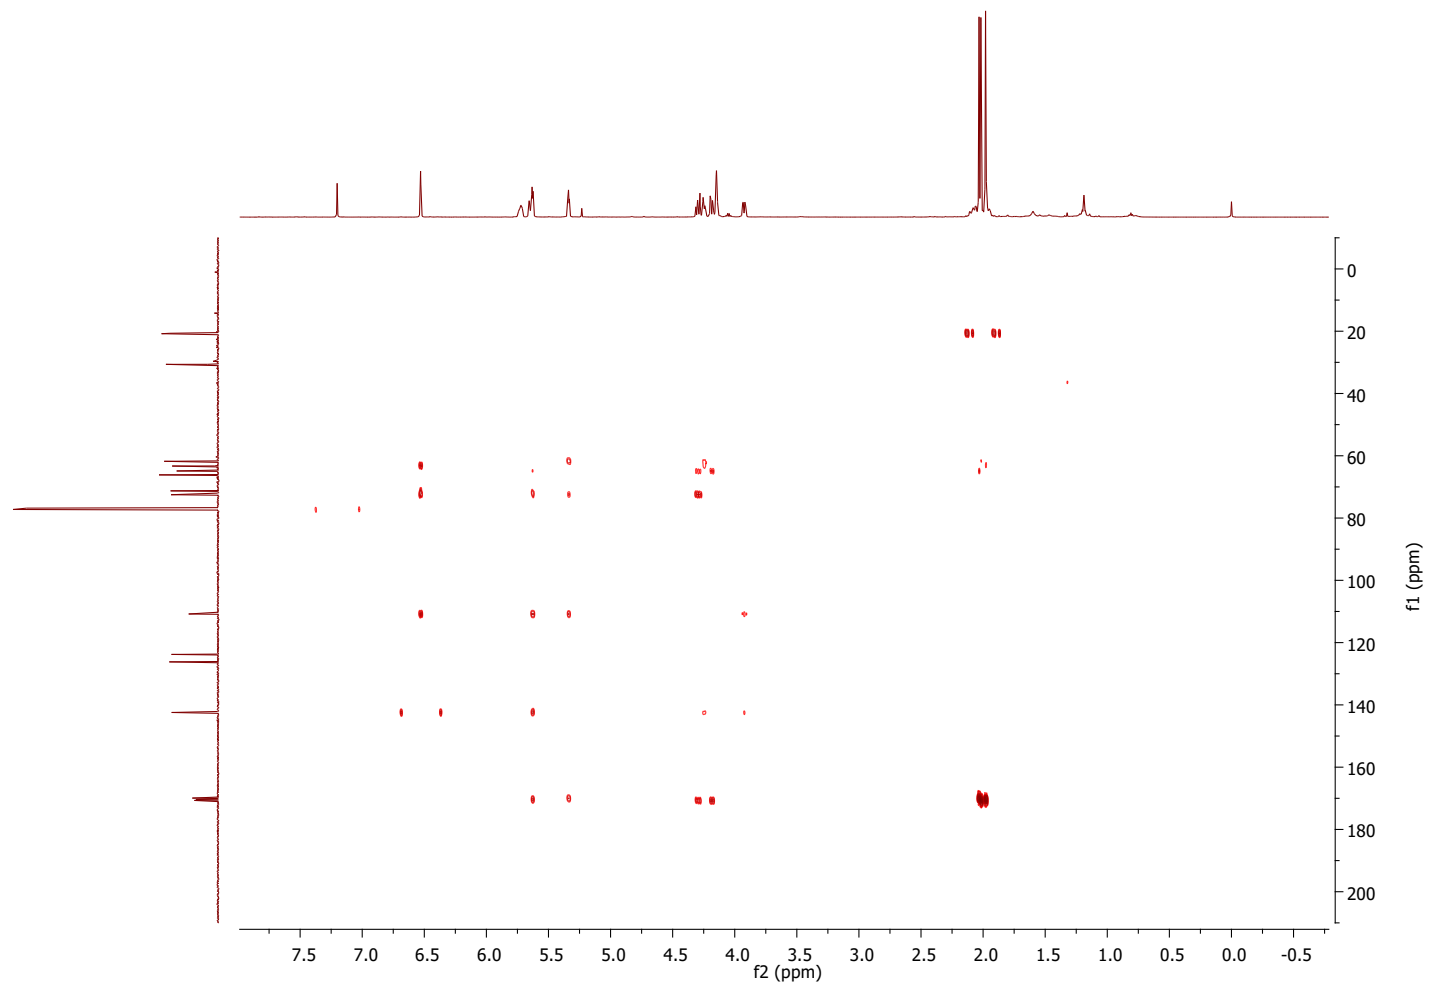

**Fig.:** HSQC of compound **4e**

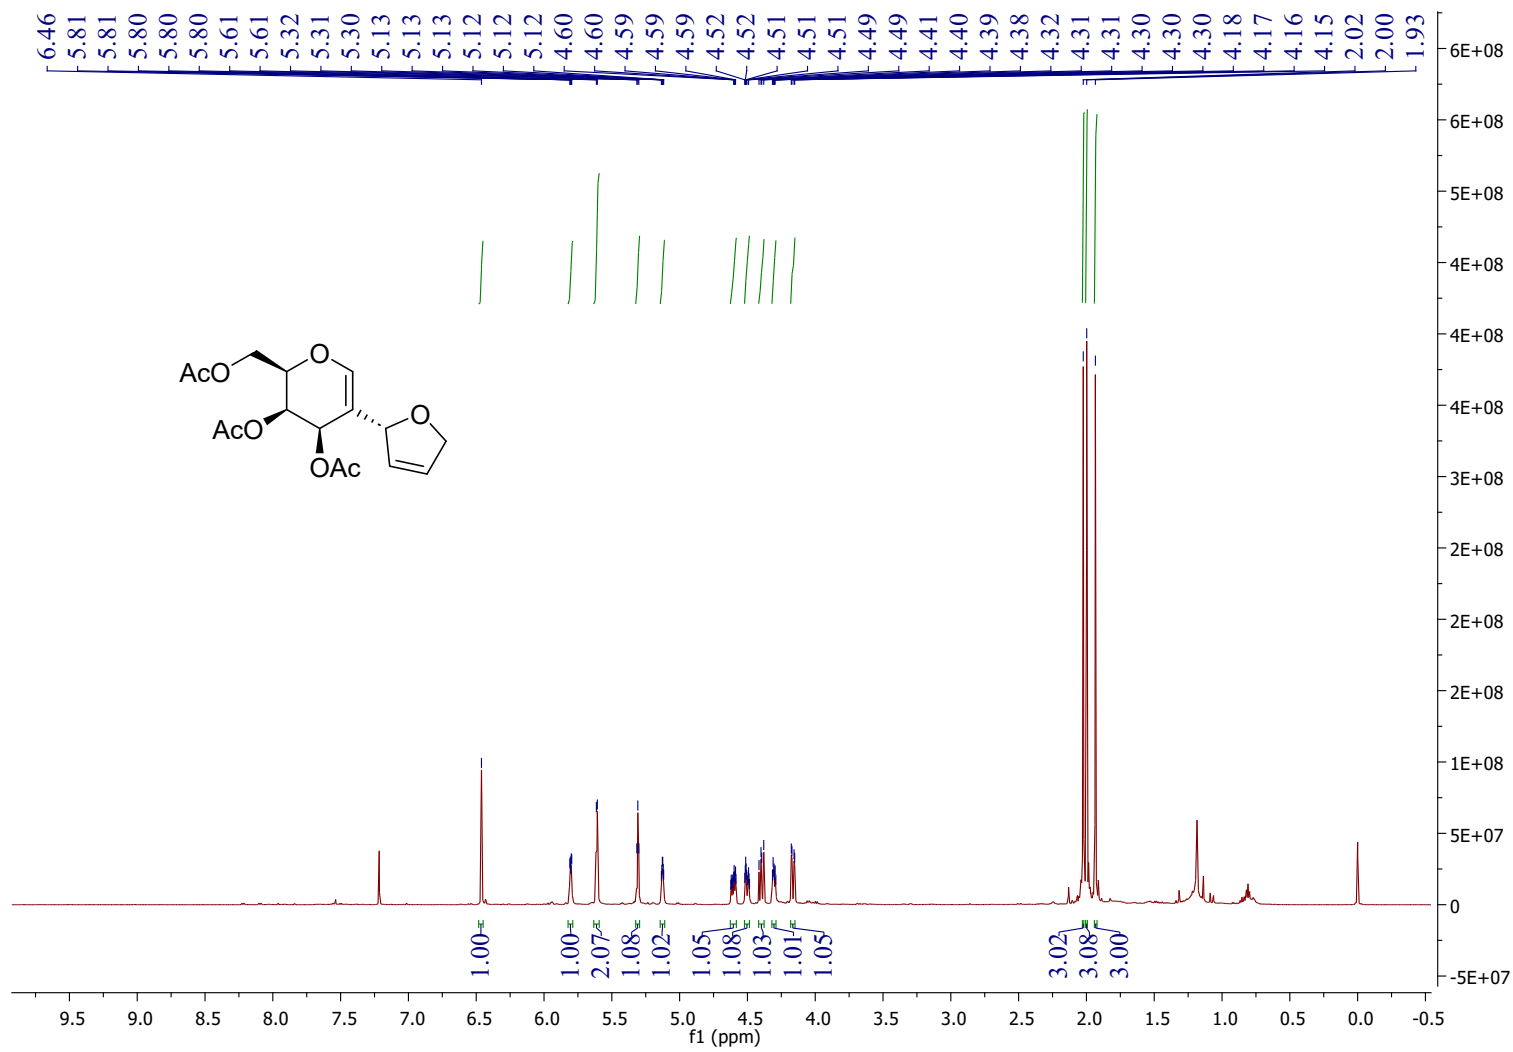

Fig.: <sup>1</sup>HNMR (600 MHz, CDCl<sub>3</sub>) of compound 4f

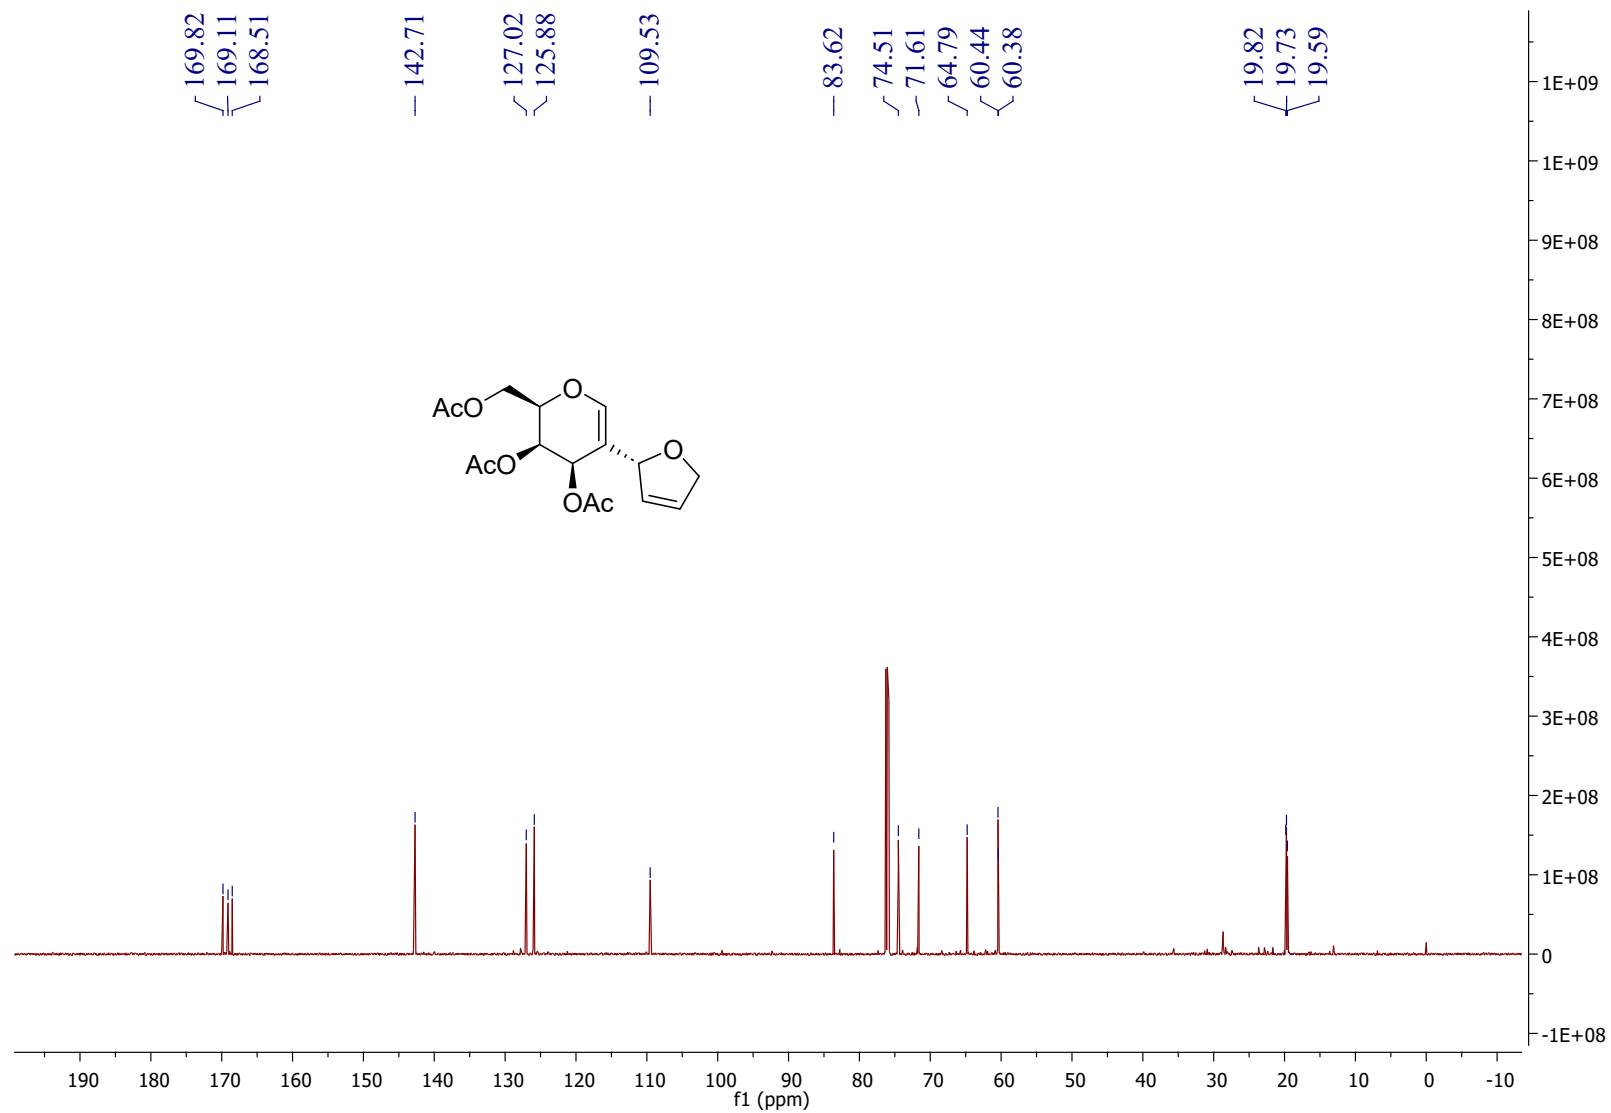

Fig.:  $^{13}\text{C}$ NMR (151 MHz,  $\text{CDCl}_3$ ) of compound 4f

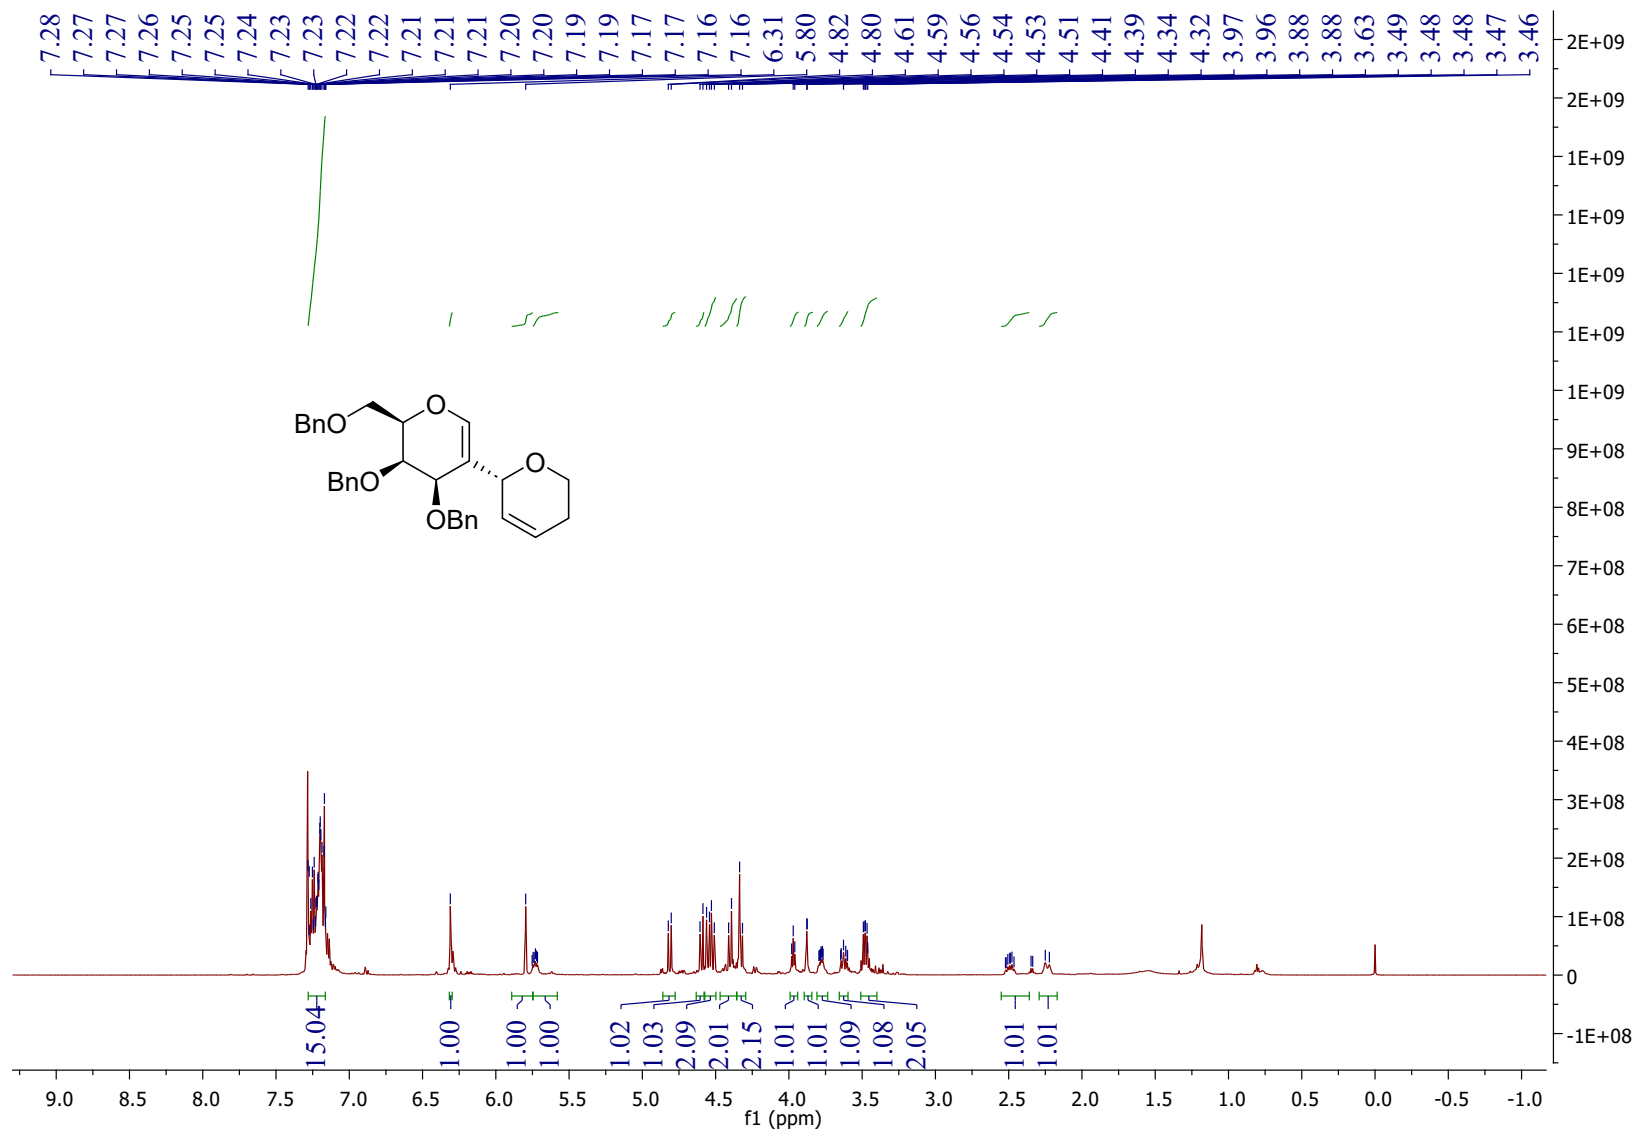

**Fig.:**  $^1\text{H}$ NMR (600 MHz,  $\text{CDCl}_3$ ) of compound **4g**

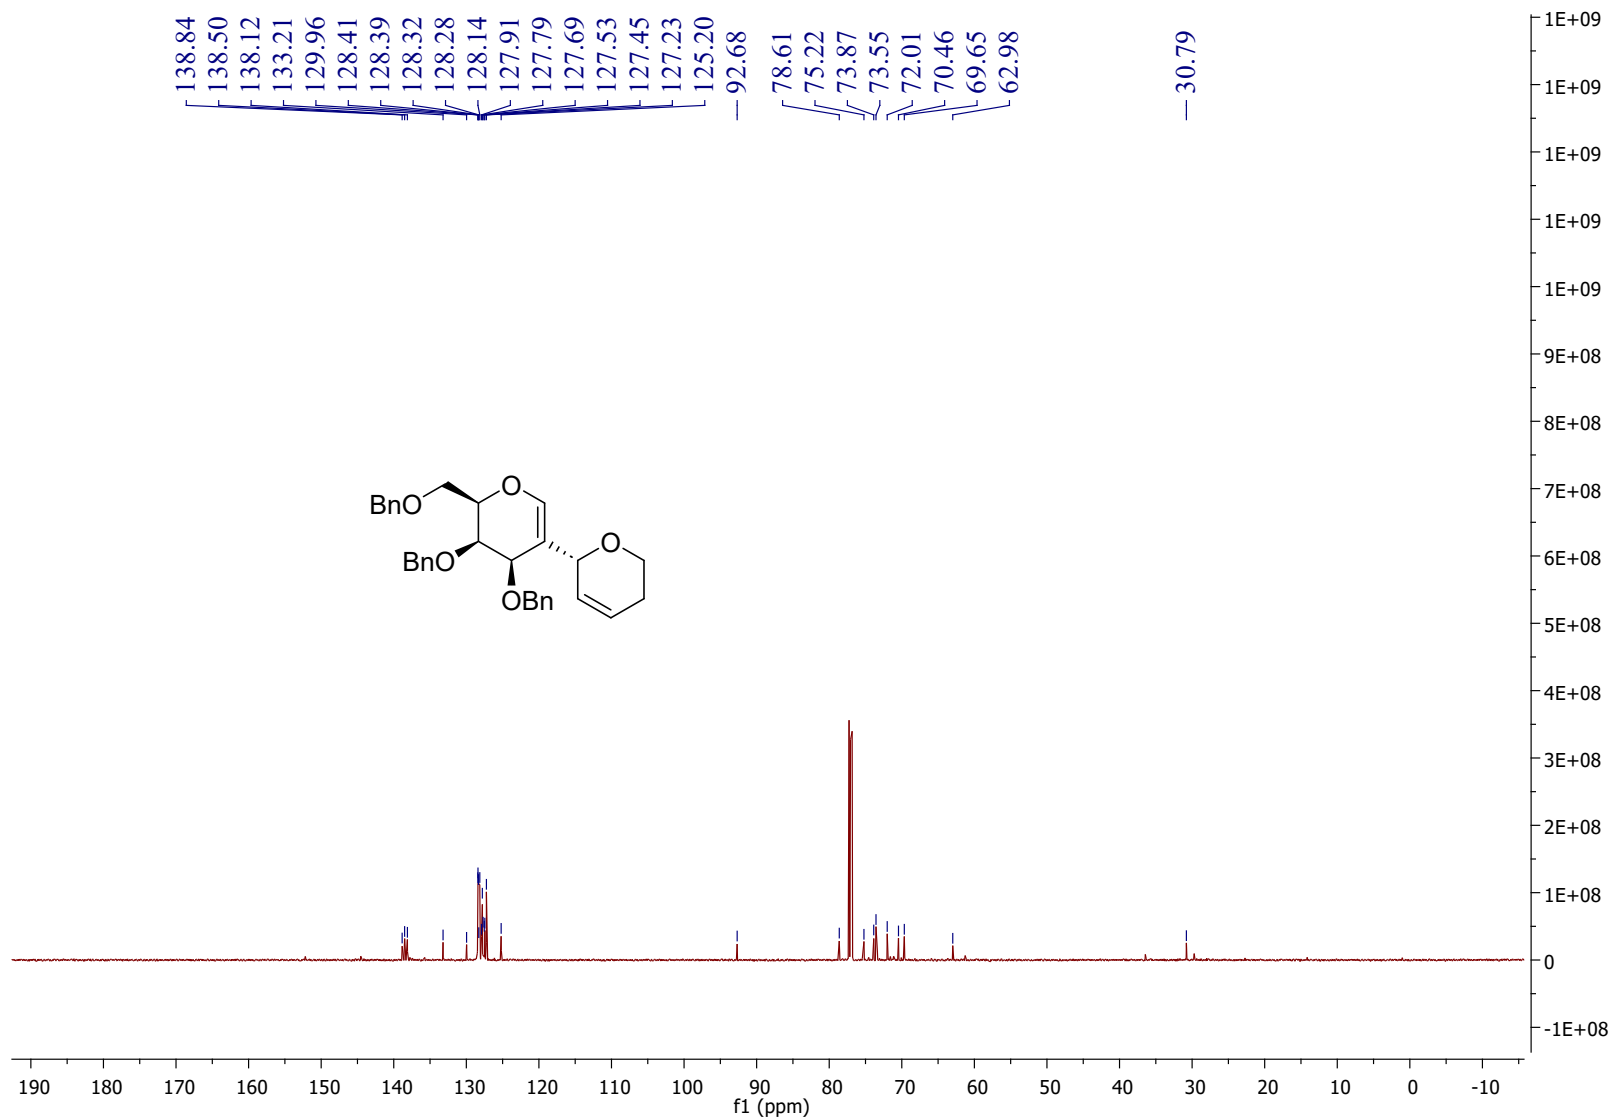

Fig.:  $^{13}\text{C}$ NMR (151 MHz,  $\text{CDCl}_3$ ) of compound 4g

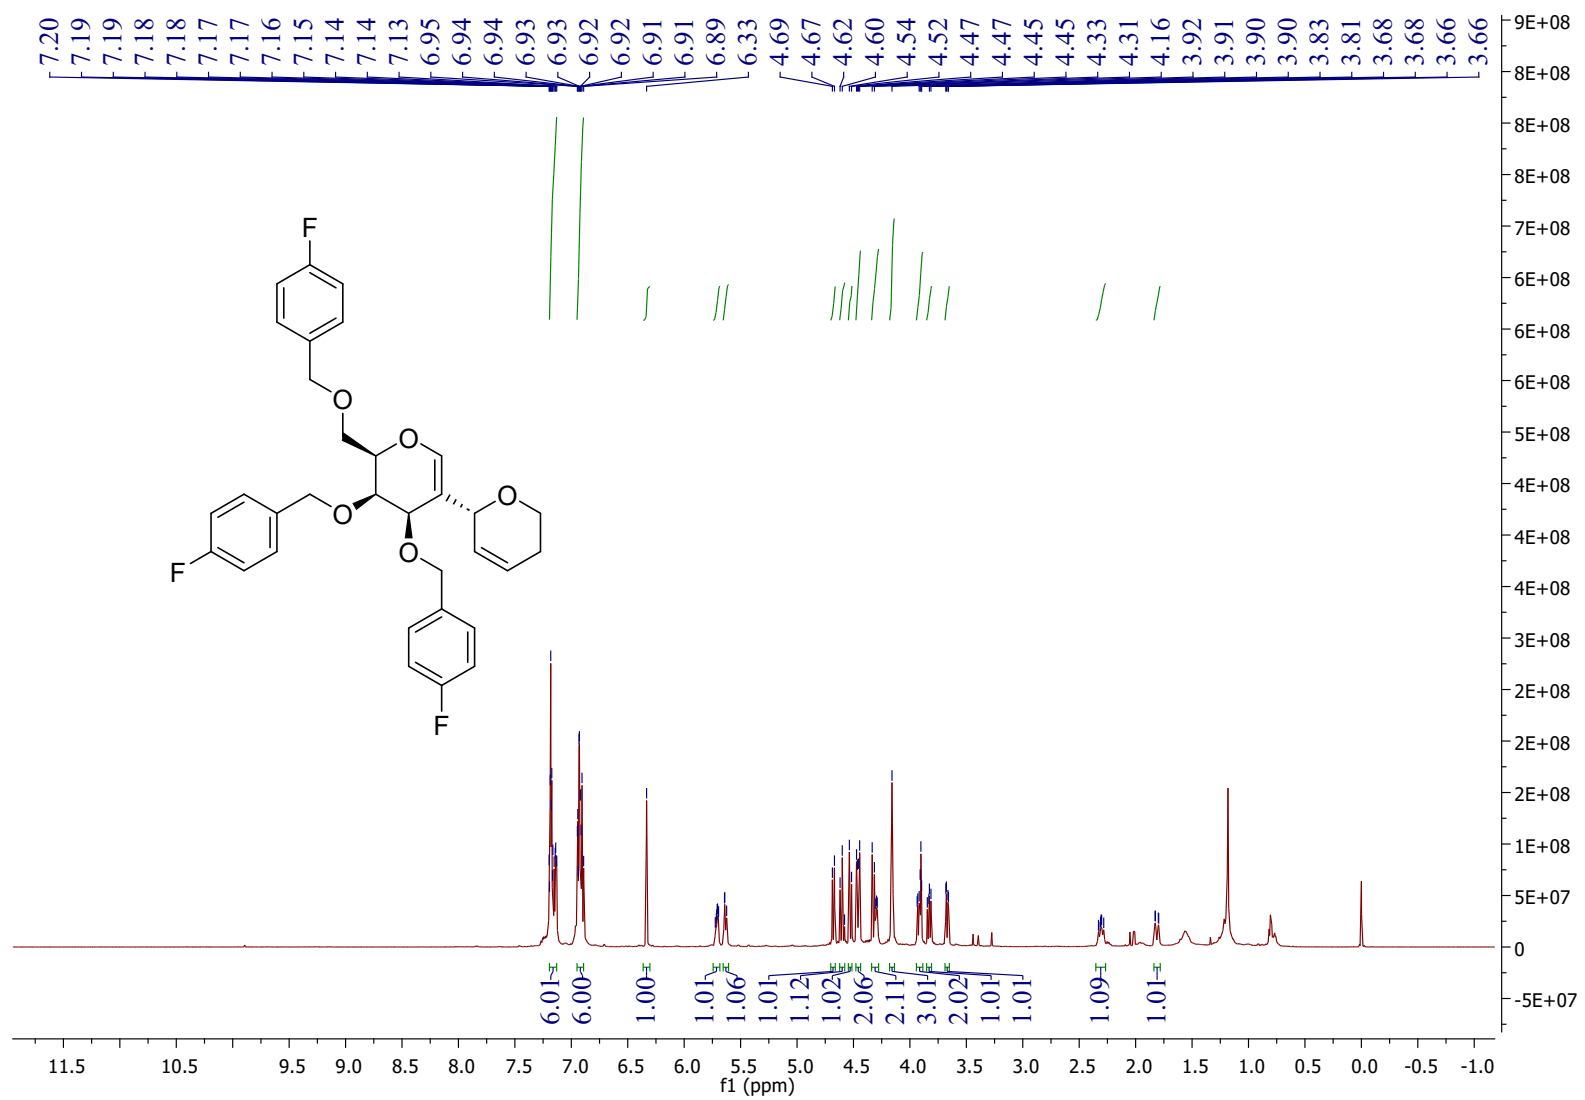

**Fig.:**  $^1\text{H NMR}$  (600 MHz,  $\text{CDCl}_3$ ) of compound **4h**

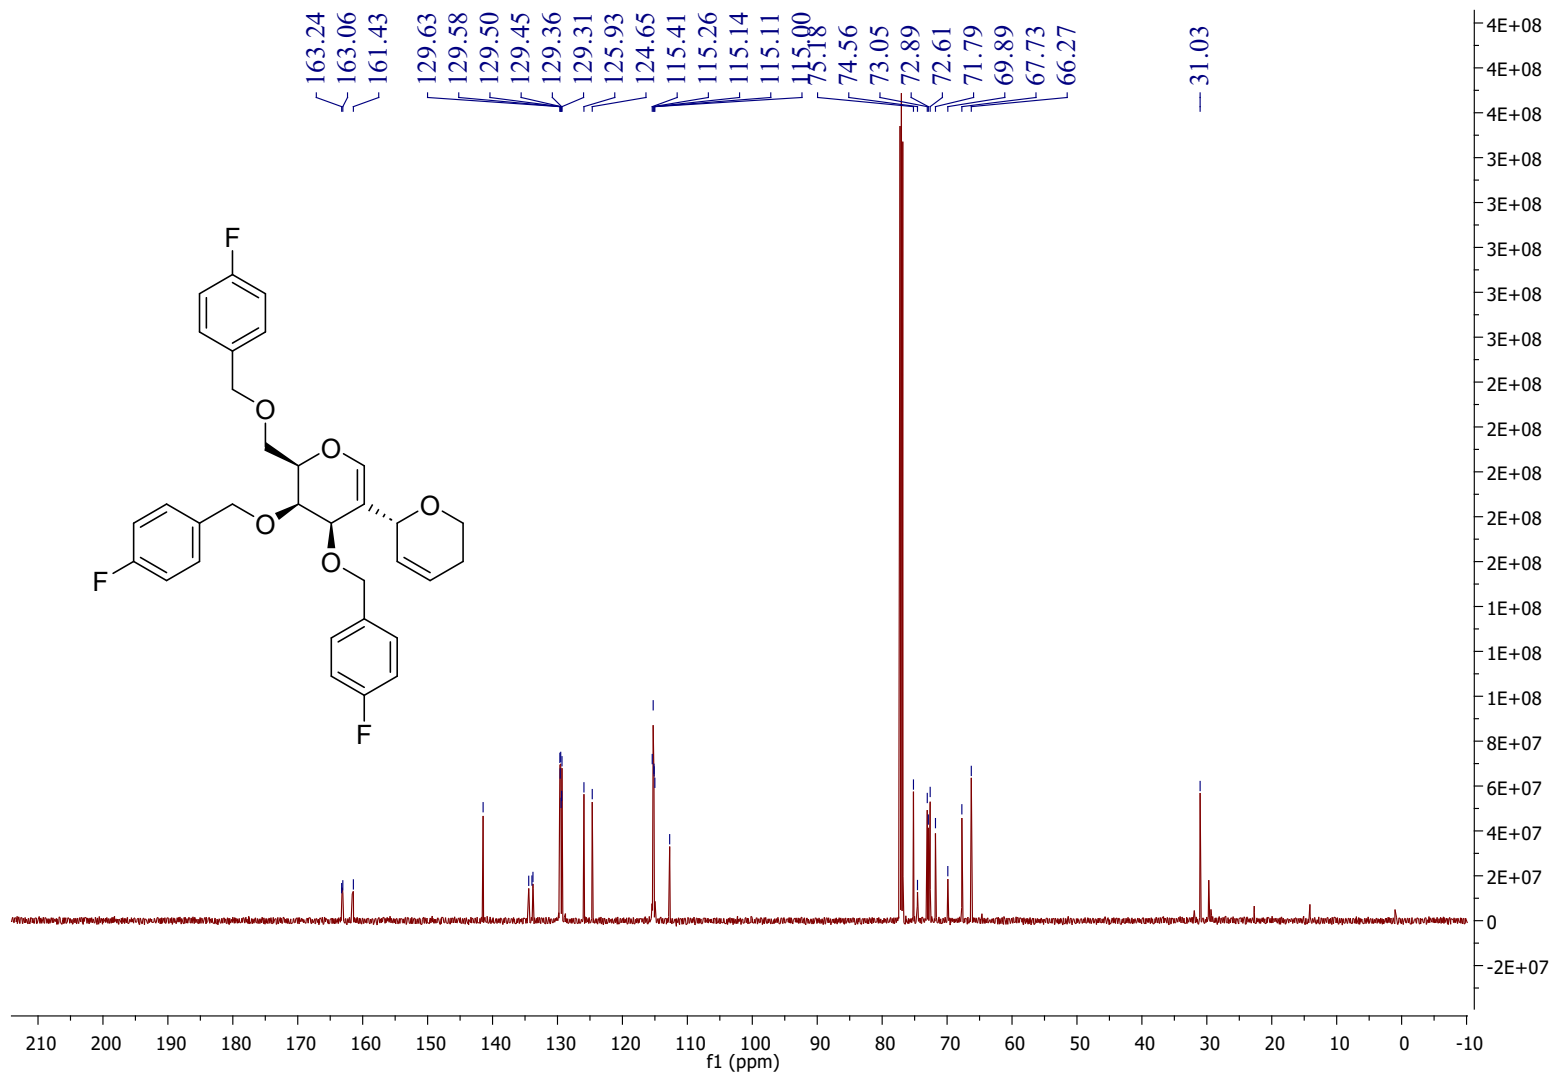

Fig.:  $^{13}\text{C}$ NMR (151 MHz,  $\text{CDCl}_3$ ) of compound 4h

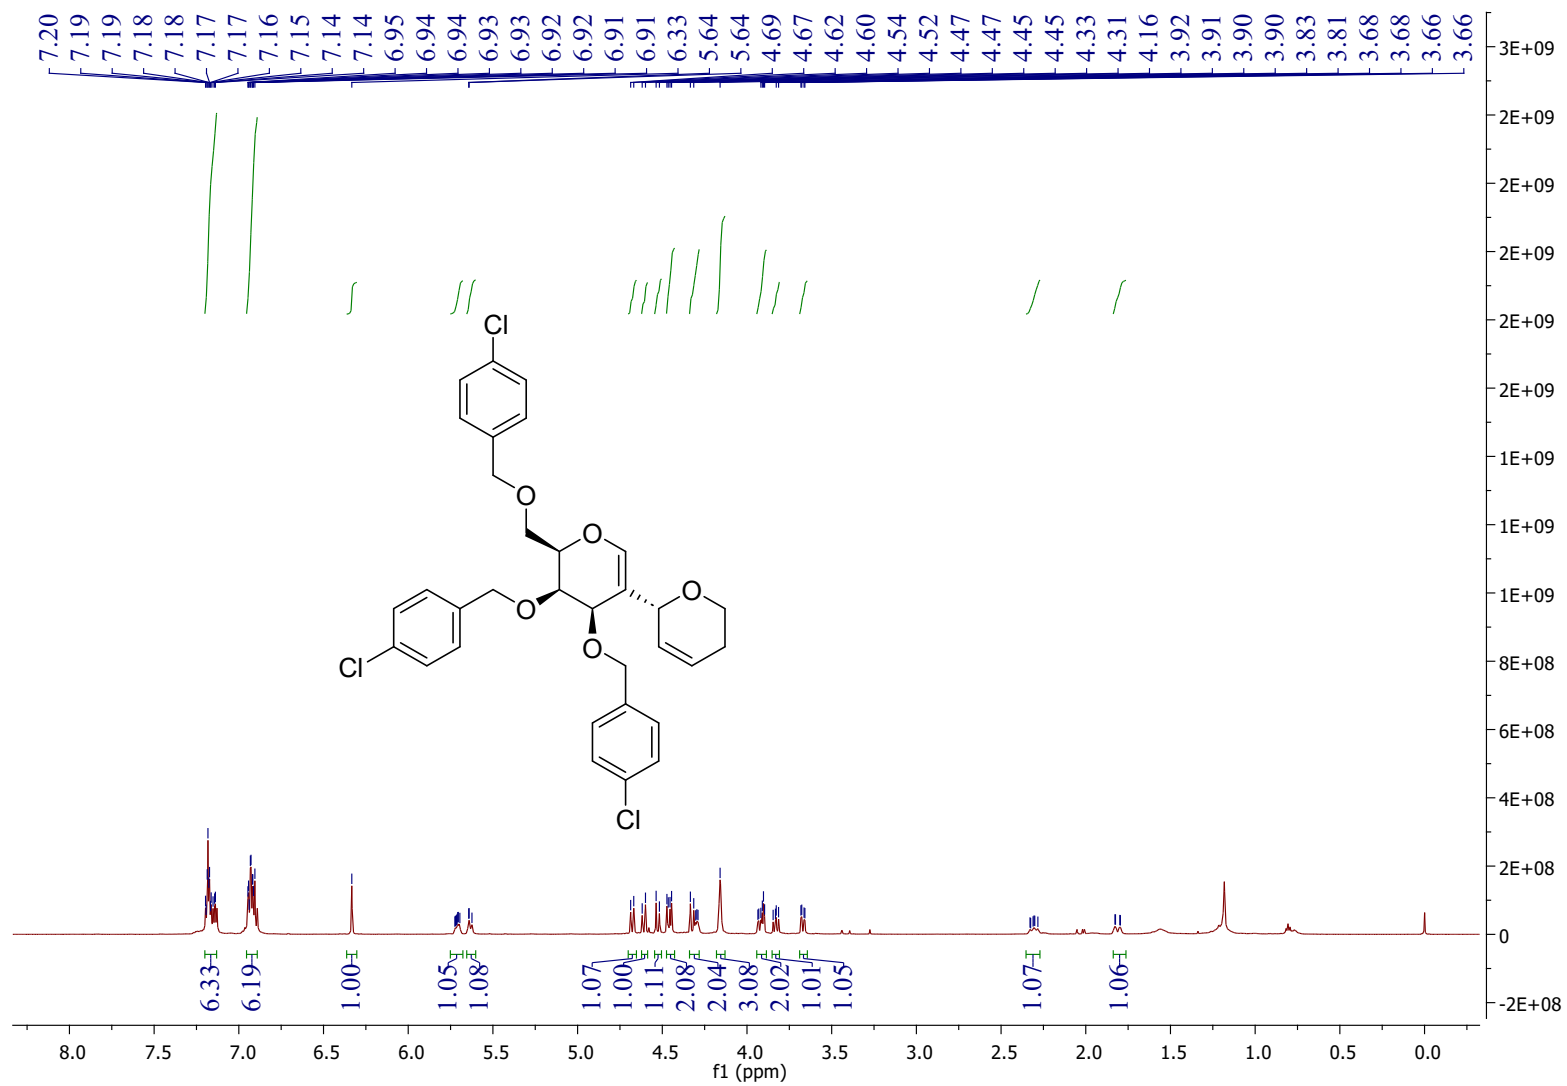

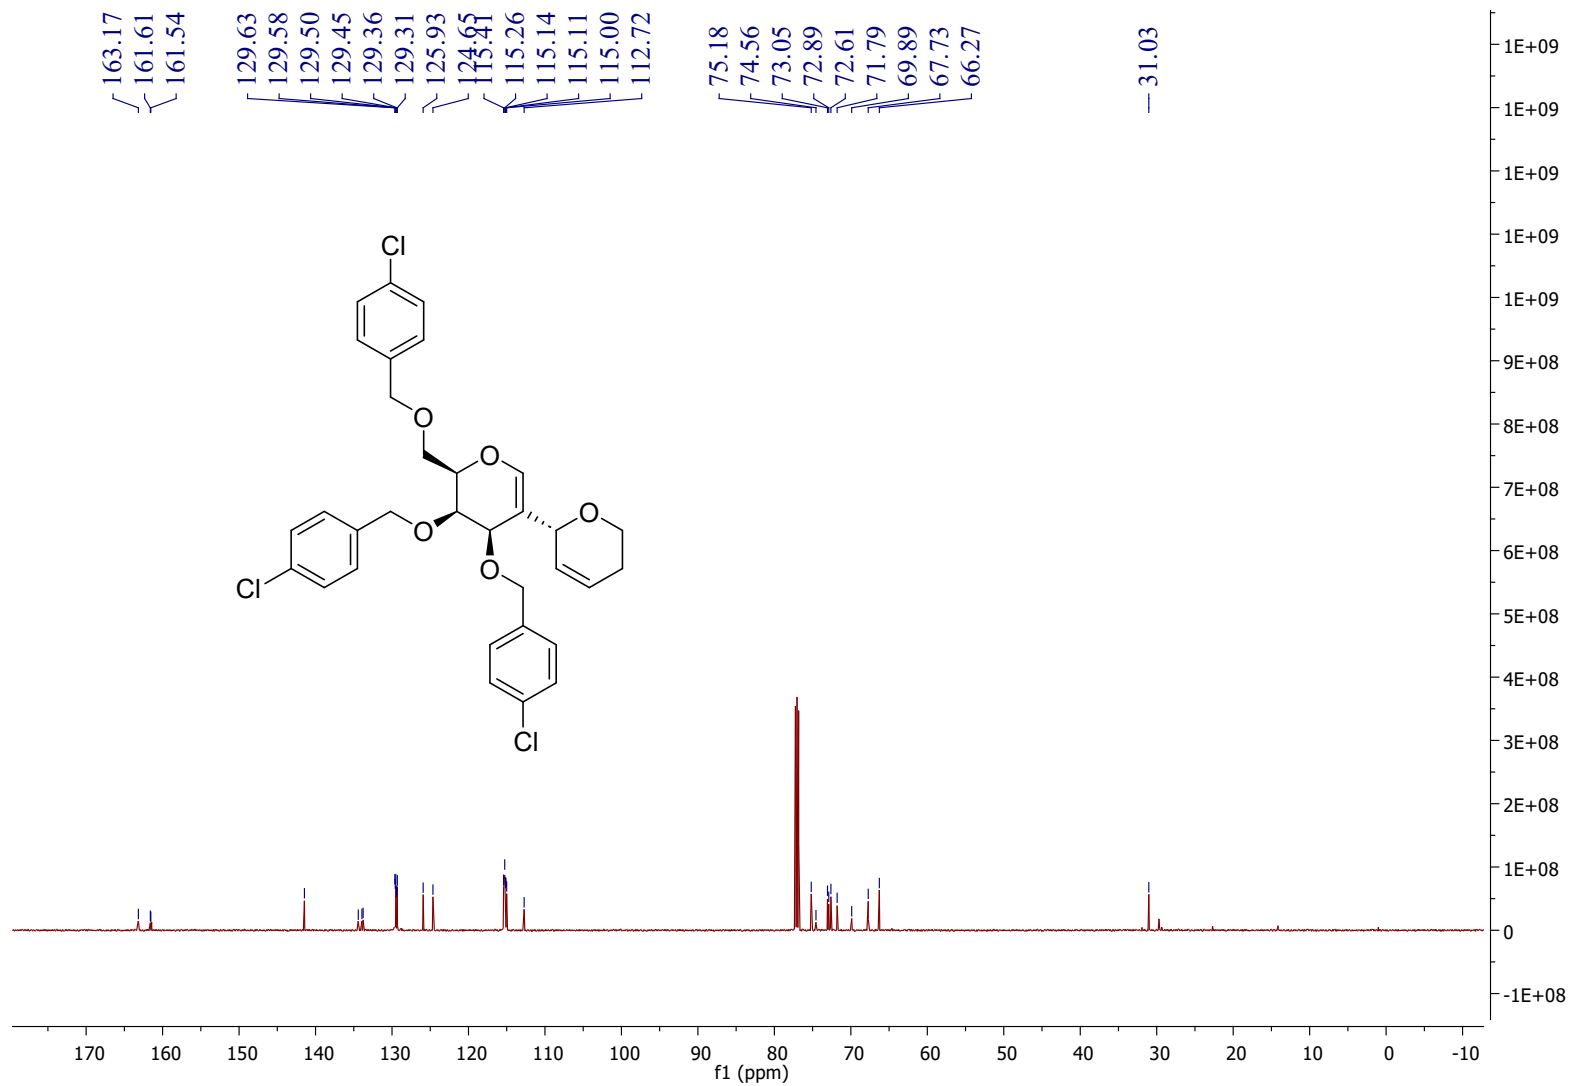

Fig.:  $^{13}\text{C}$ NMR (151 MHz,  $\text{CDCl}_3$ ) of compound 4i

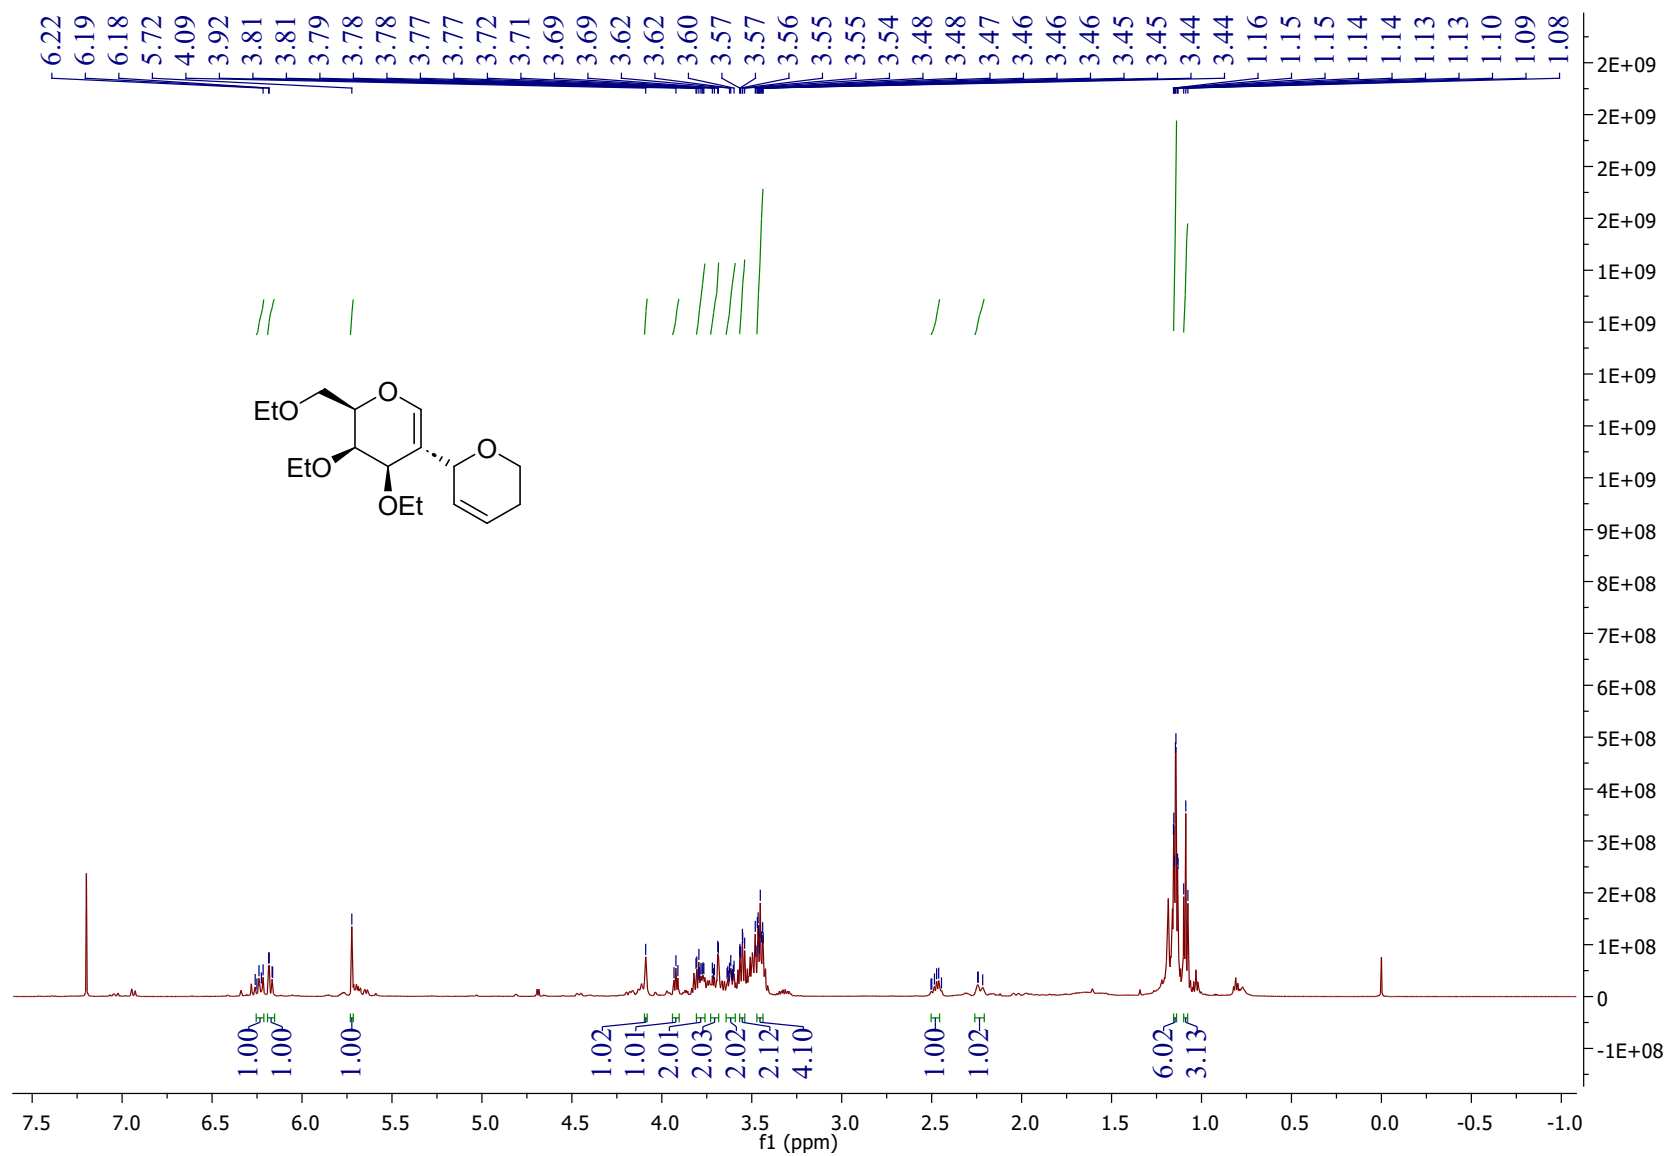

Fig.: <sup>1</sup>HNMR (600 MHz, CDCl<sub>3</sub>) of compound 4j

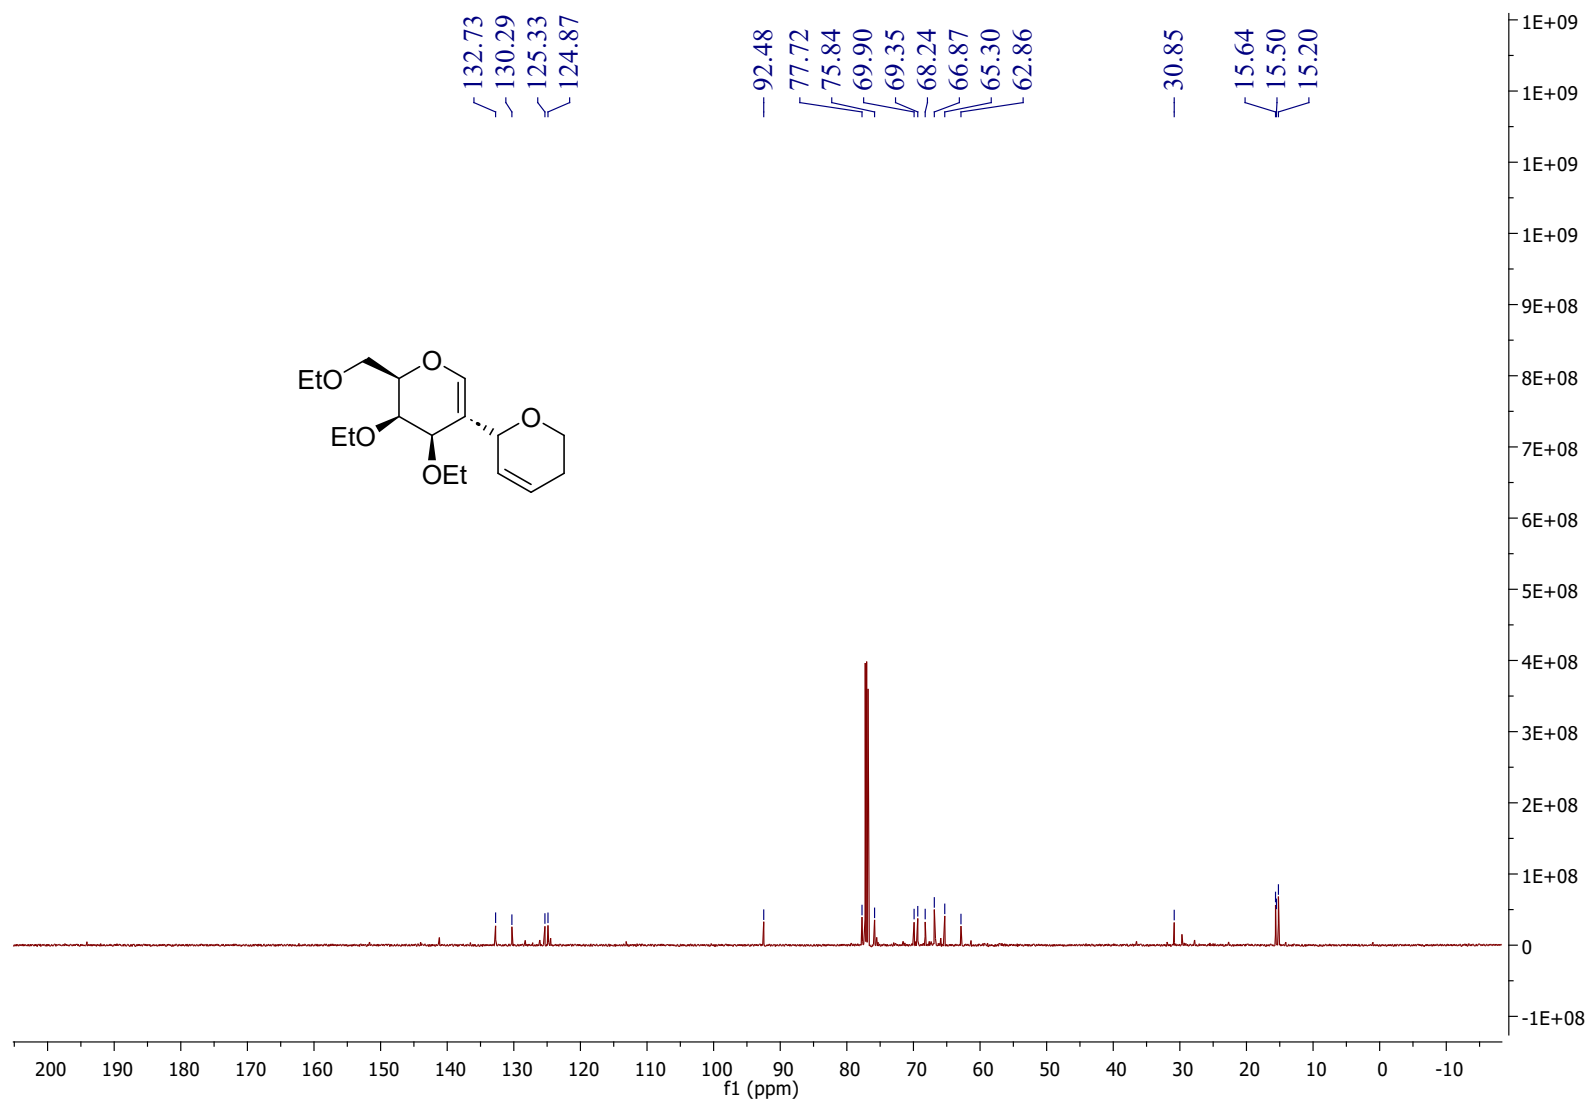

Fig.:  $^{13}\text{C}$ NMR (151 MHz,  $\text{CDCl}_3$ ) of compound 4j

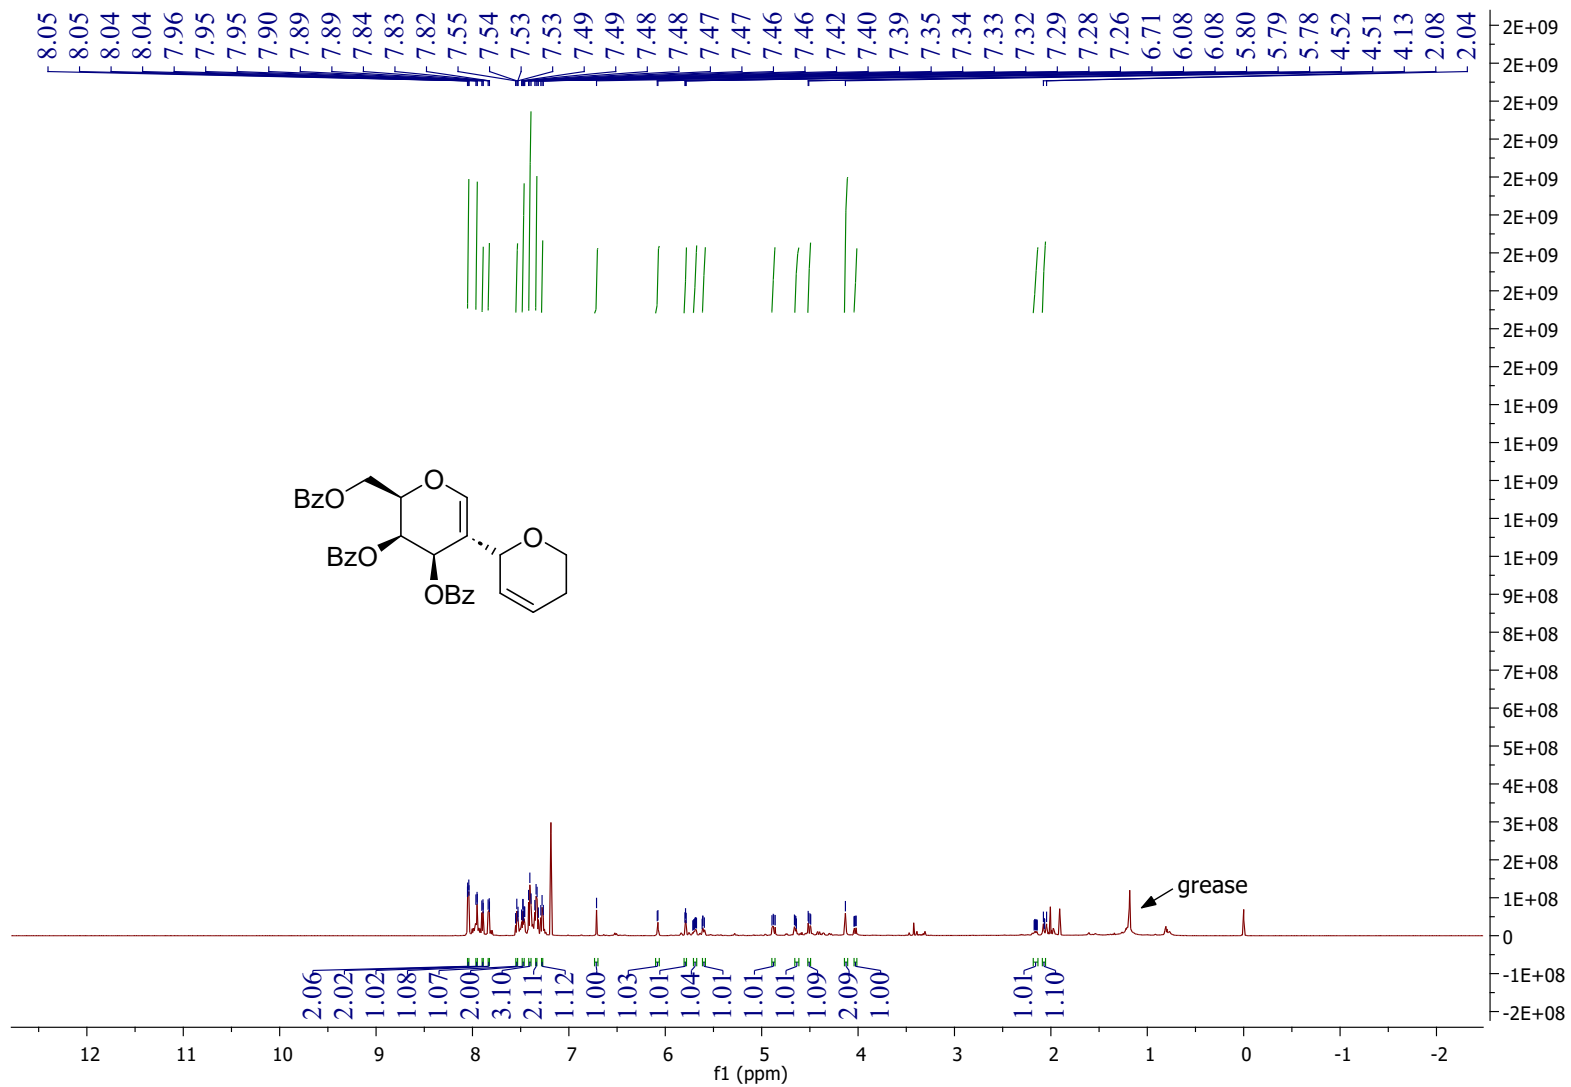

Fig.: <sup>1</sup>H NMR (600 MHz, CDCl<sub>3</sub>) of compound 4k

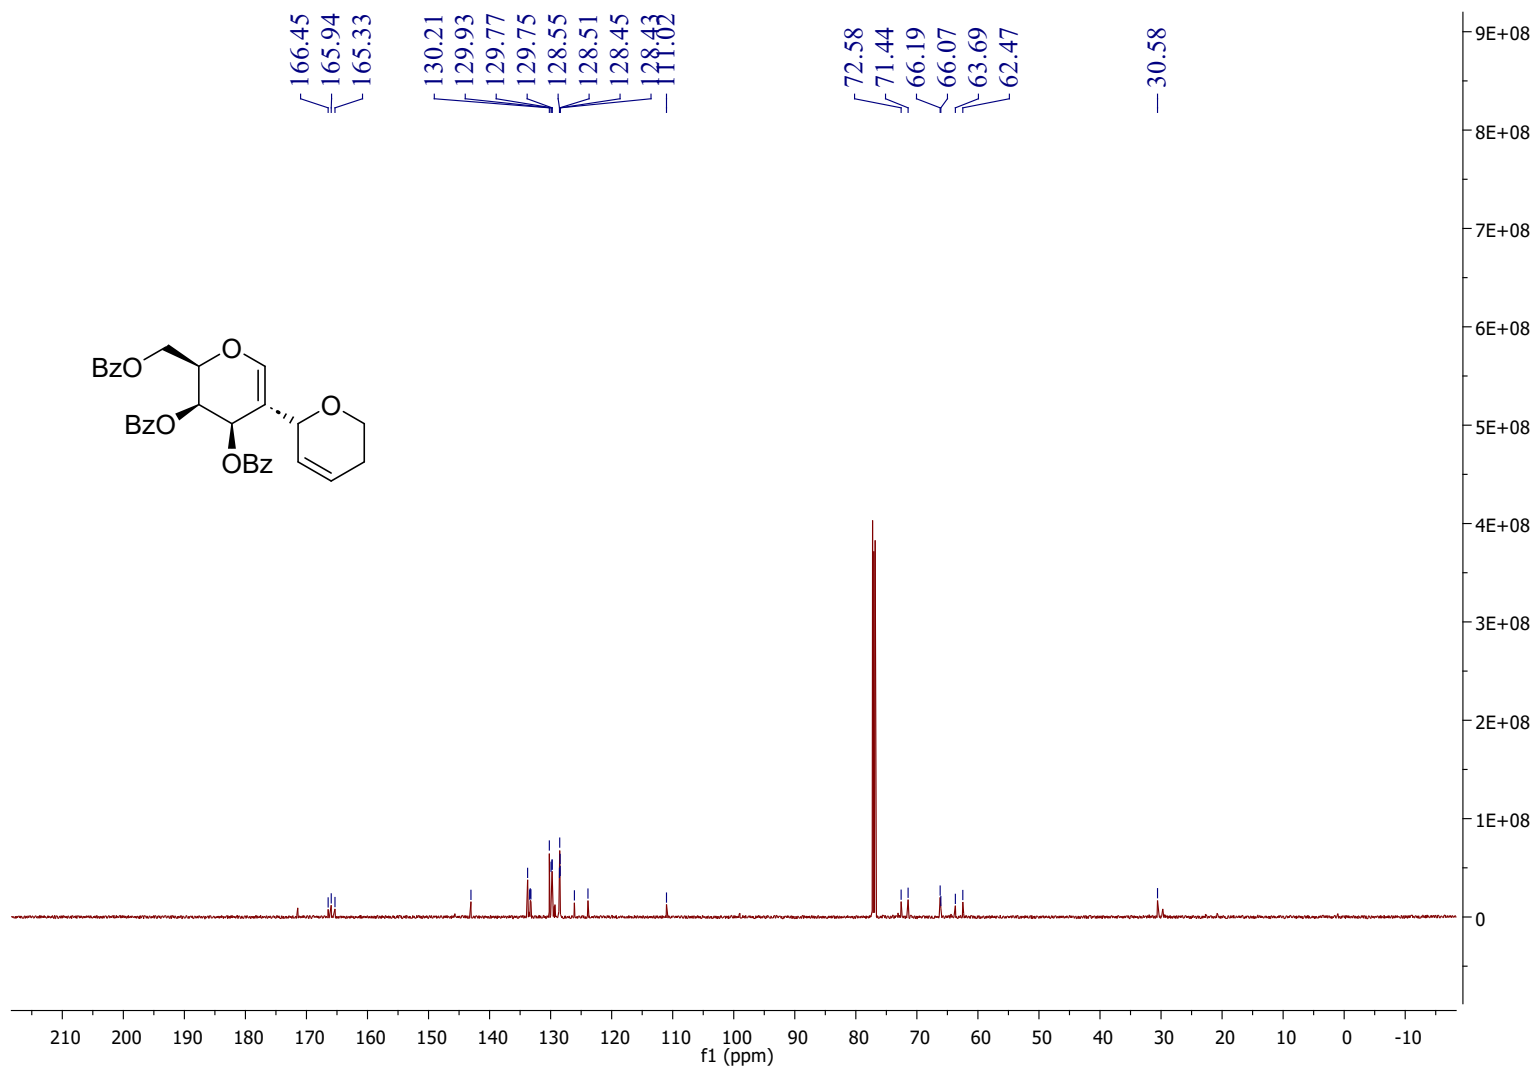

Fig :  $^{13}\text{C}$ NMR (151 MHz,  $\text{CDCl}_3$ ) of compound 4k

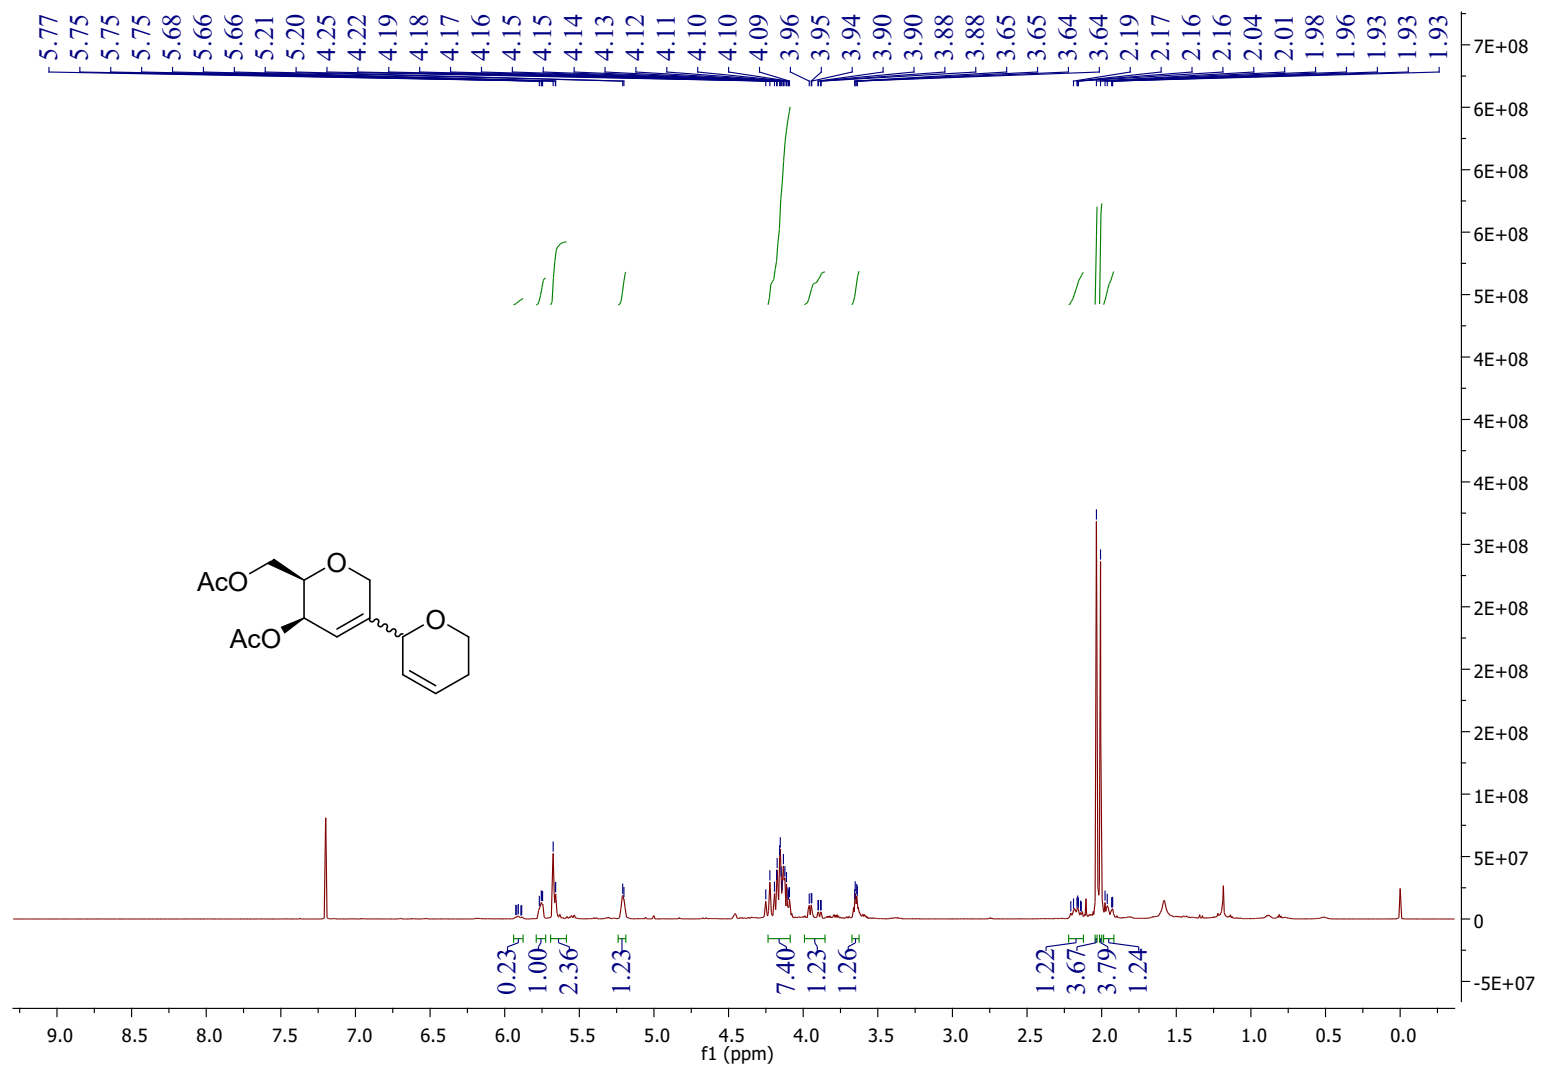

Fig.: <sup>1</sup>H NMR (600 MHz, CDCl<sub>3</sub>) of compound 7

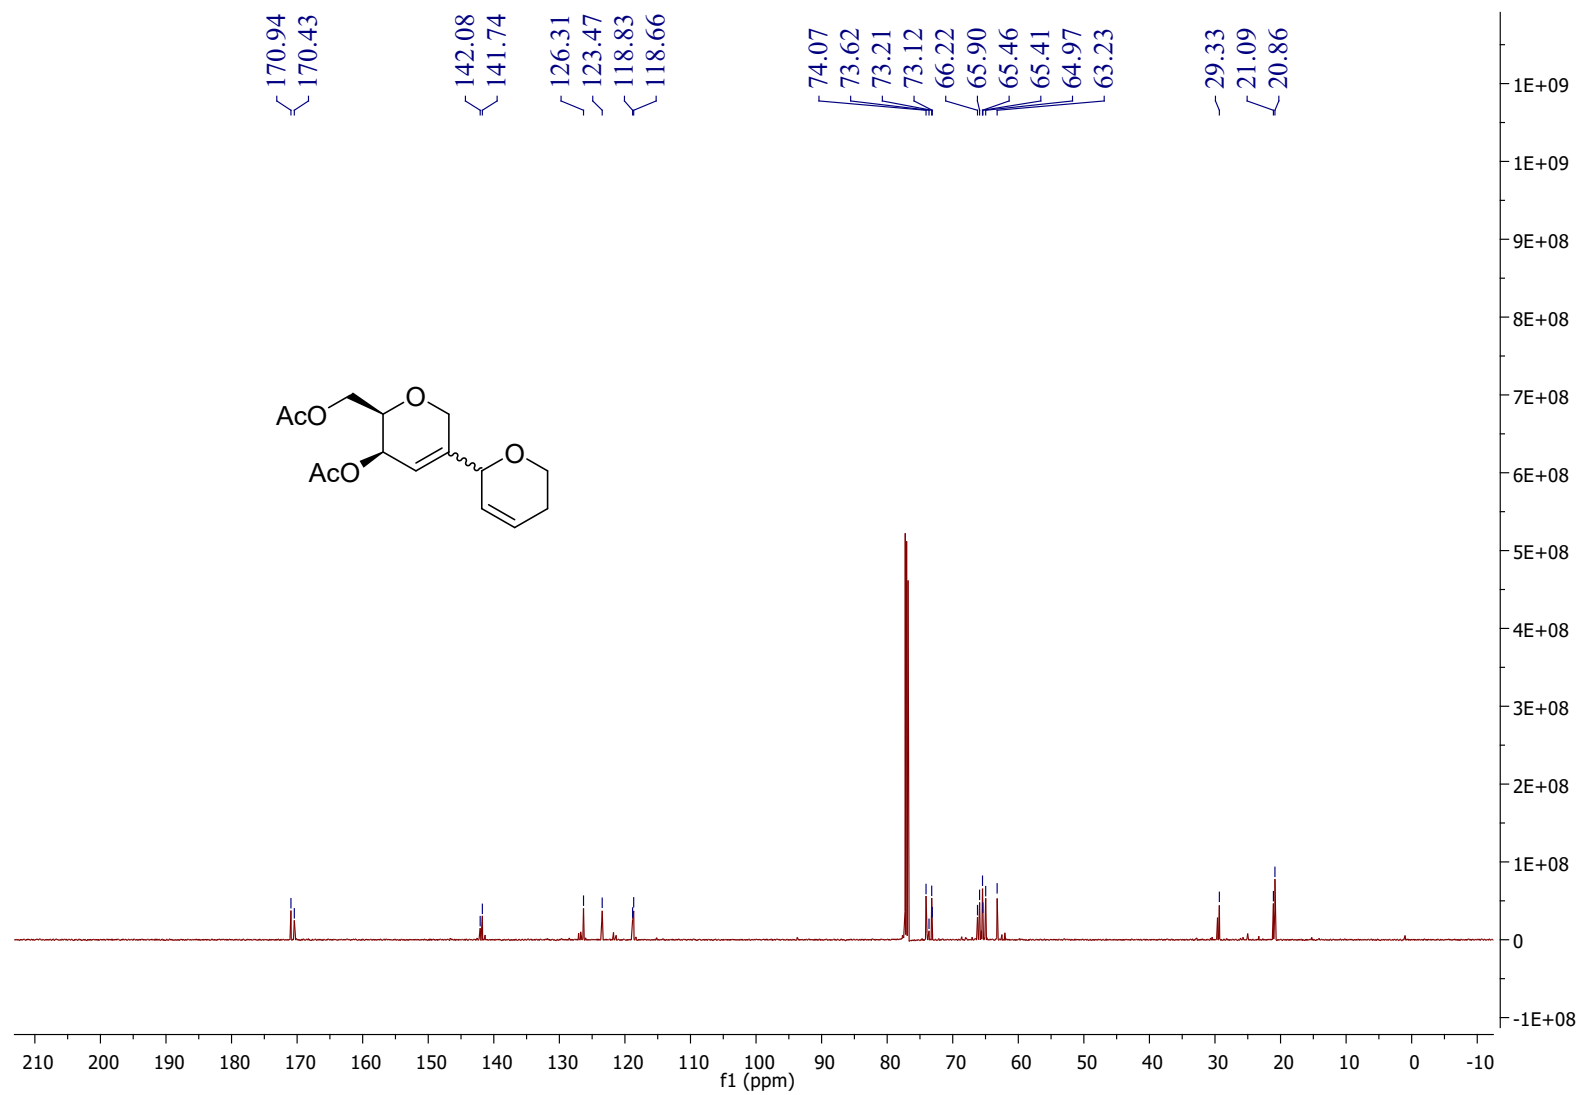

**Fig.:**  $^{13}\text{C}$ NMR (151 MHz,  $\text{CDCl}_3$ ) of compound 7

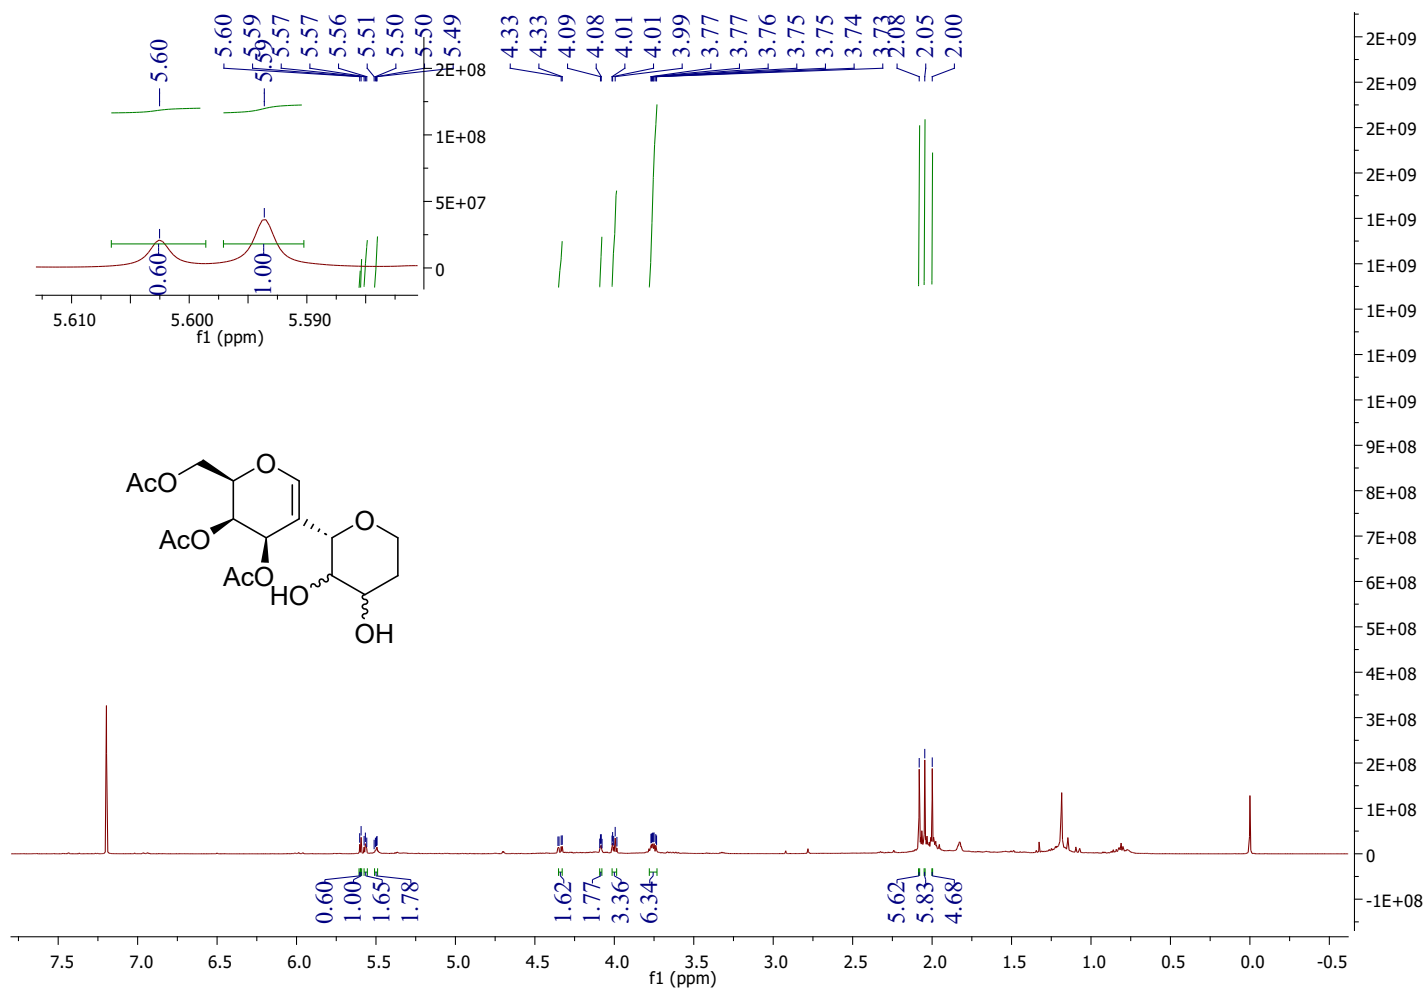

**Fig.:** <sup>1</sup>H NMR (600 MHz, CDCl<sub>3</sub>) of compound 8

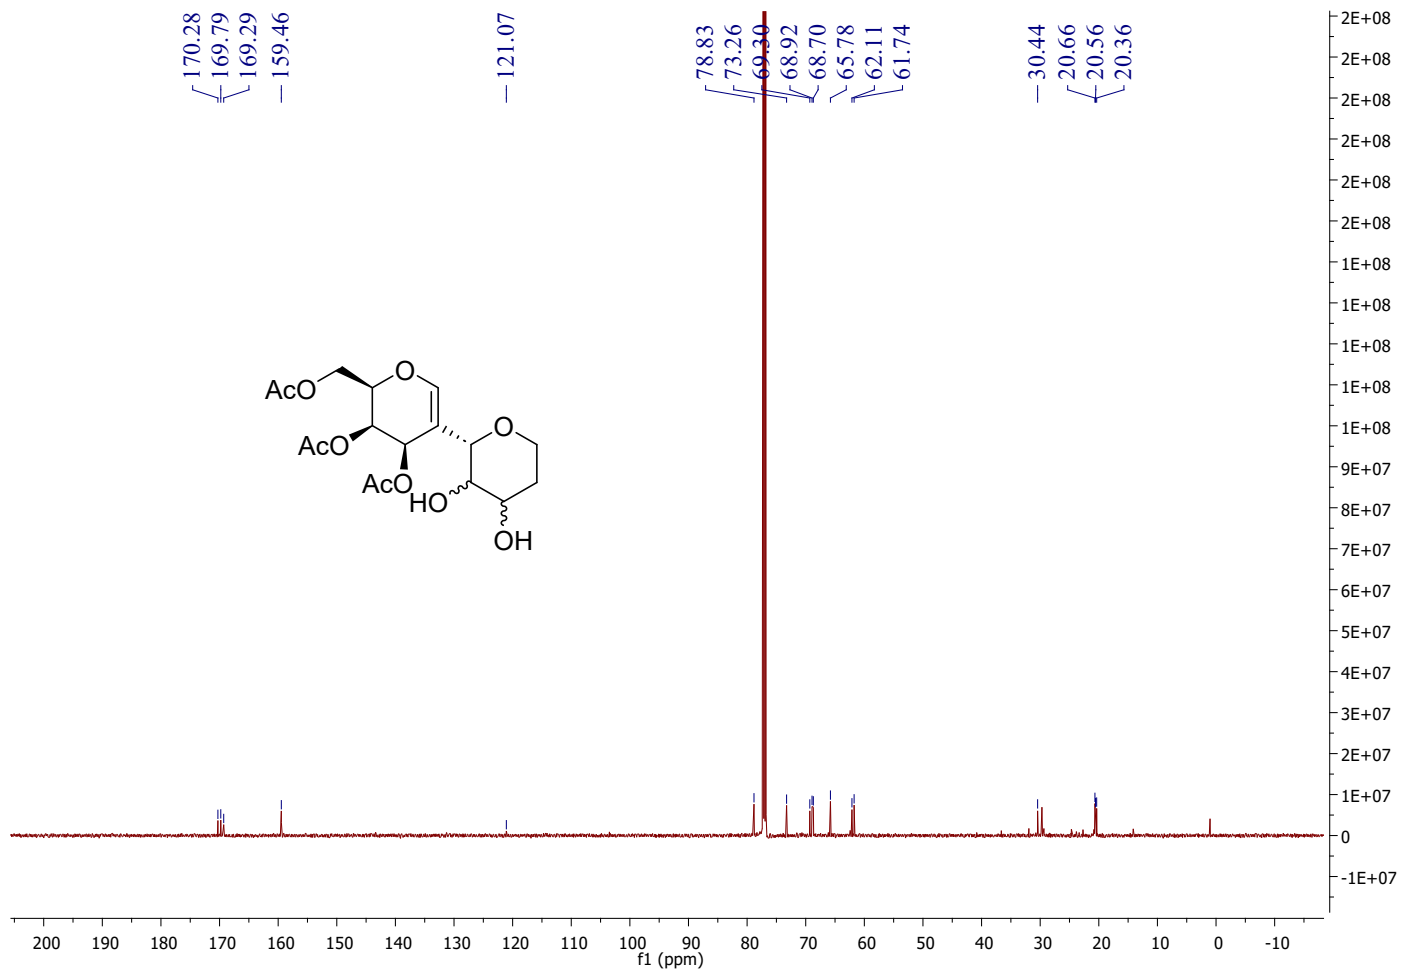

**Fig.:**  $^{13}\text{C}$ NMR (151 MHz,  $\text{CDCl}_3$ ) of compound **8**

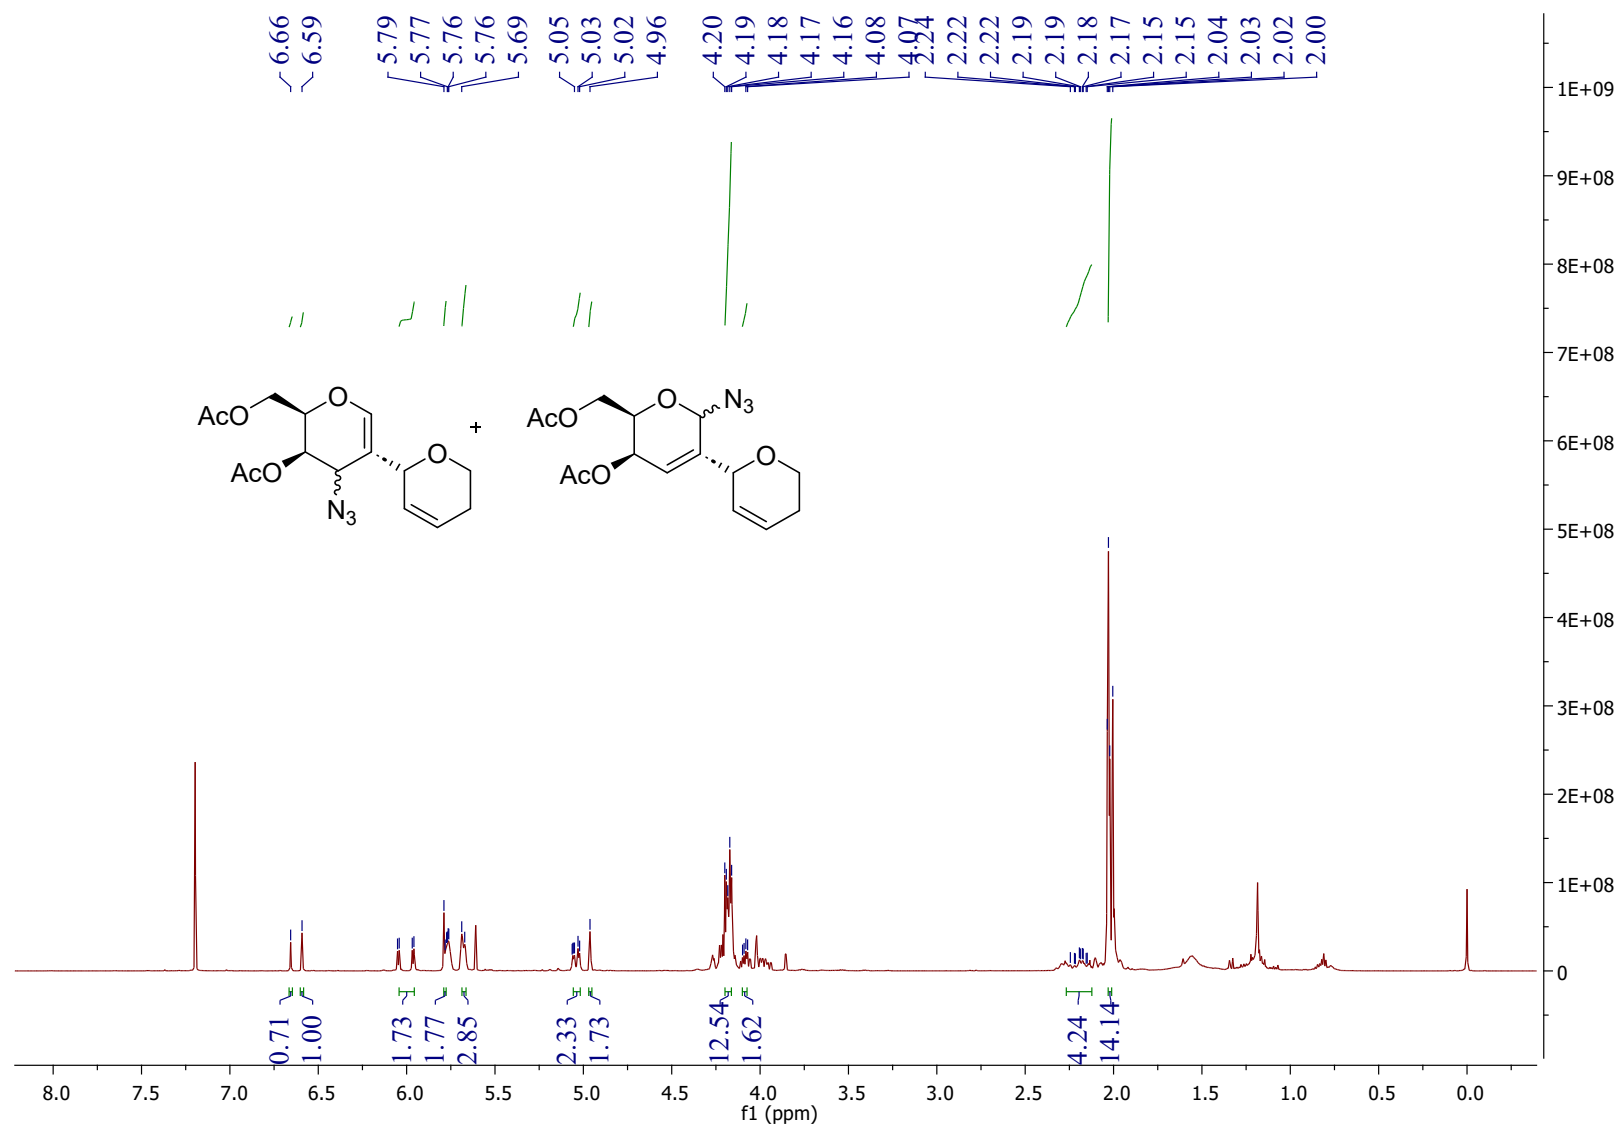

**Fig.:**  $^1\text{H}$ NMR (600 MHz,  $\text{CDCl}_3$ ) of compound **9**

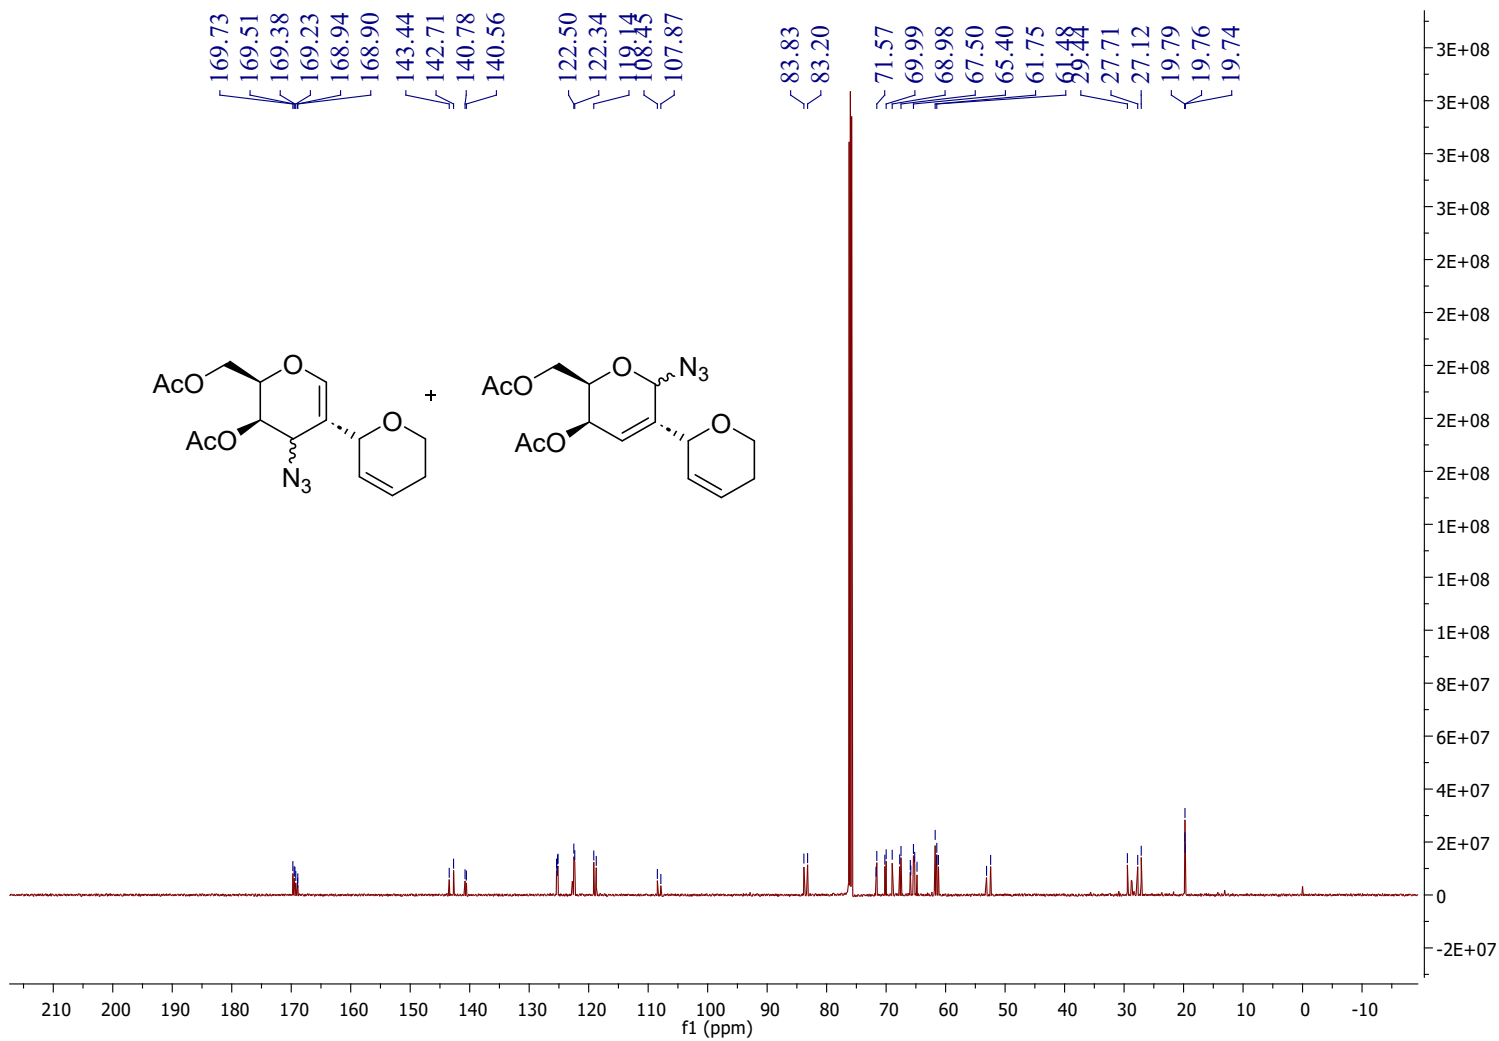

**Fig.:**  $^{13}\text{C}$ NMR (151 MHz,  $\text{CDCl}_3$ ) of compound **9**

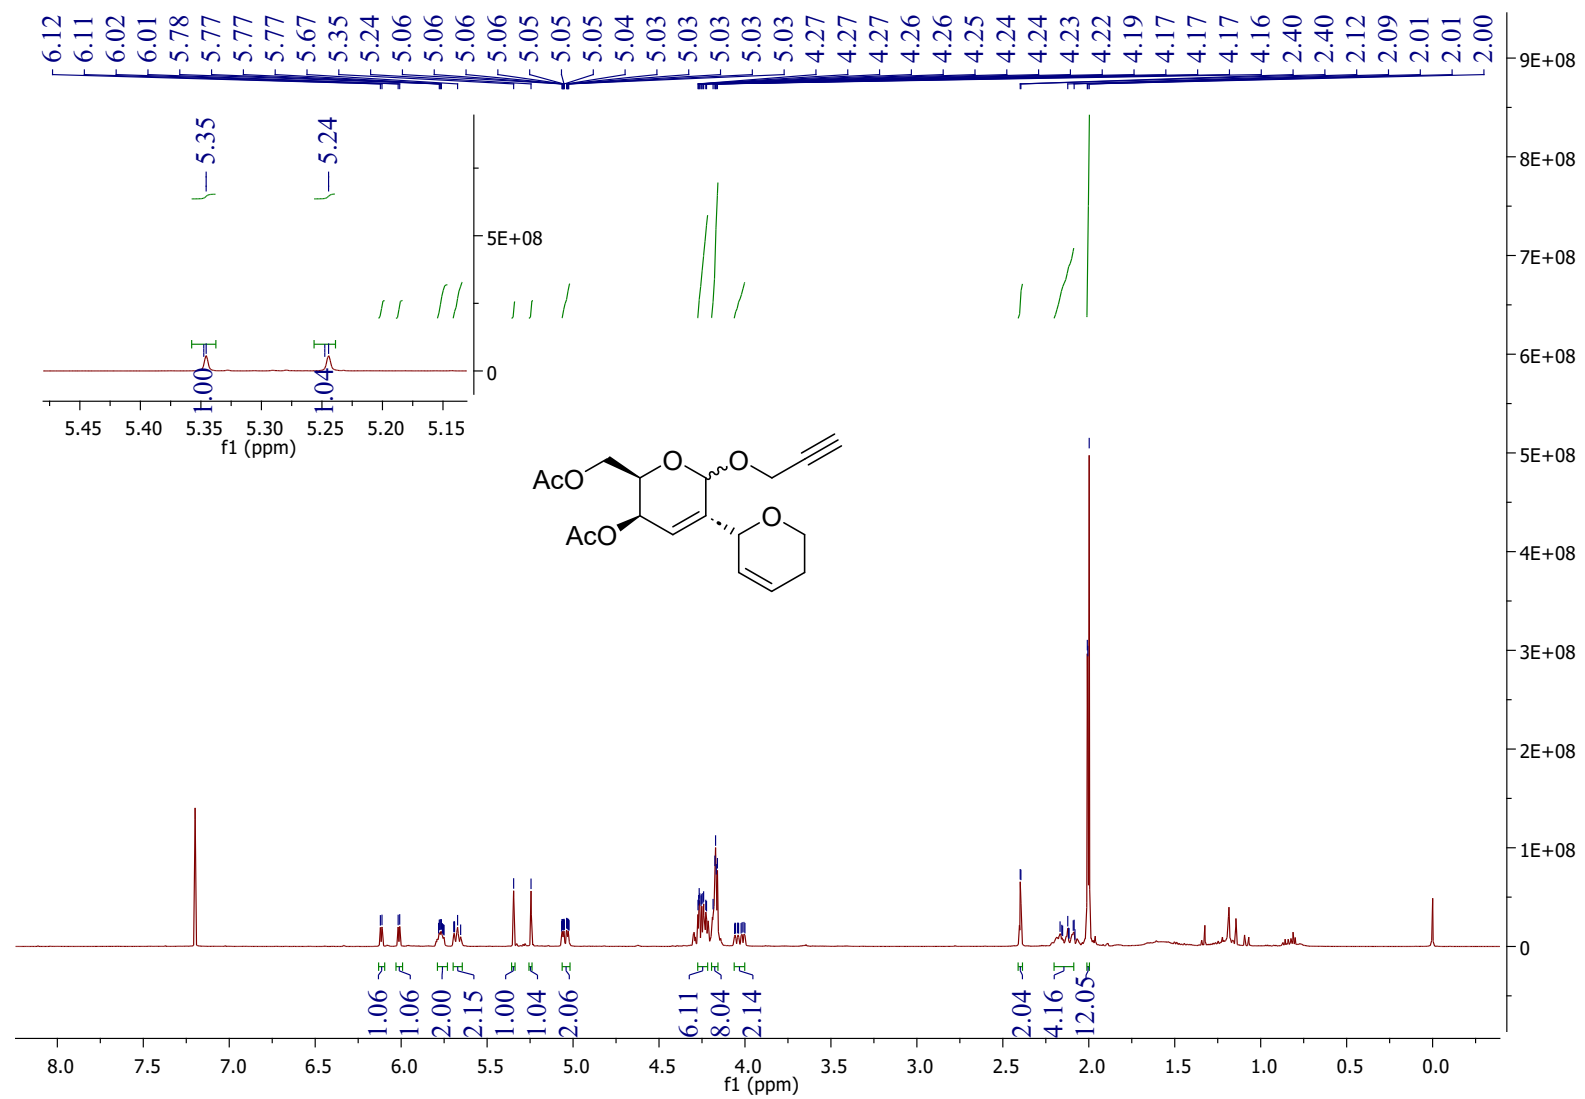

**Fig.:**  $^1\text{H}$ NMR (600 MHz,  $\text{CDCl}_3$ ) of compound **10**

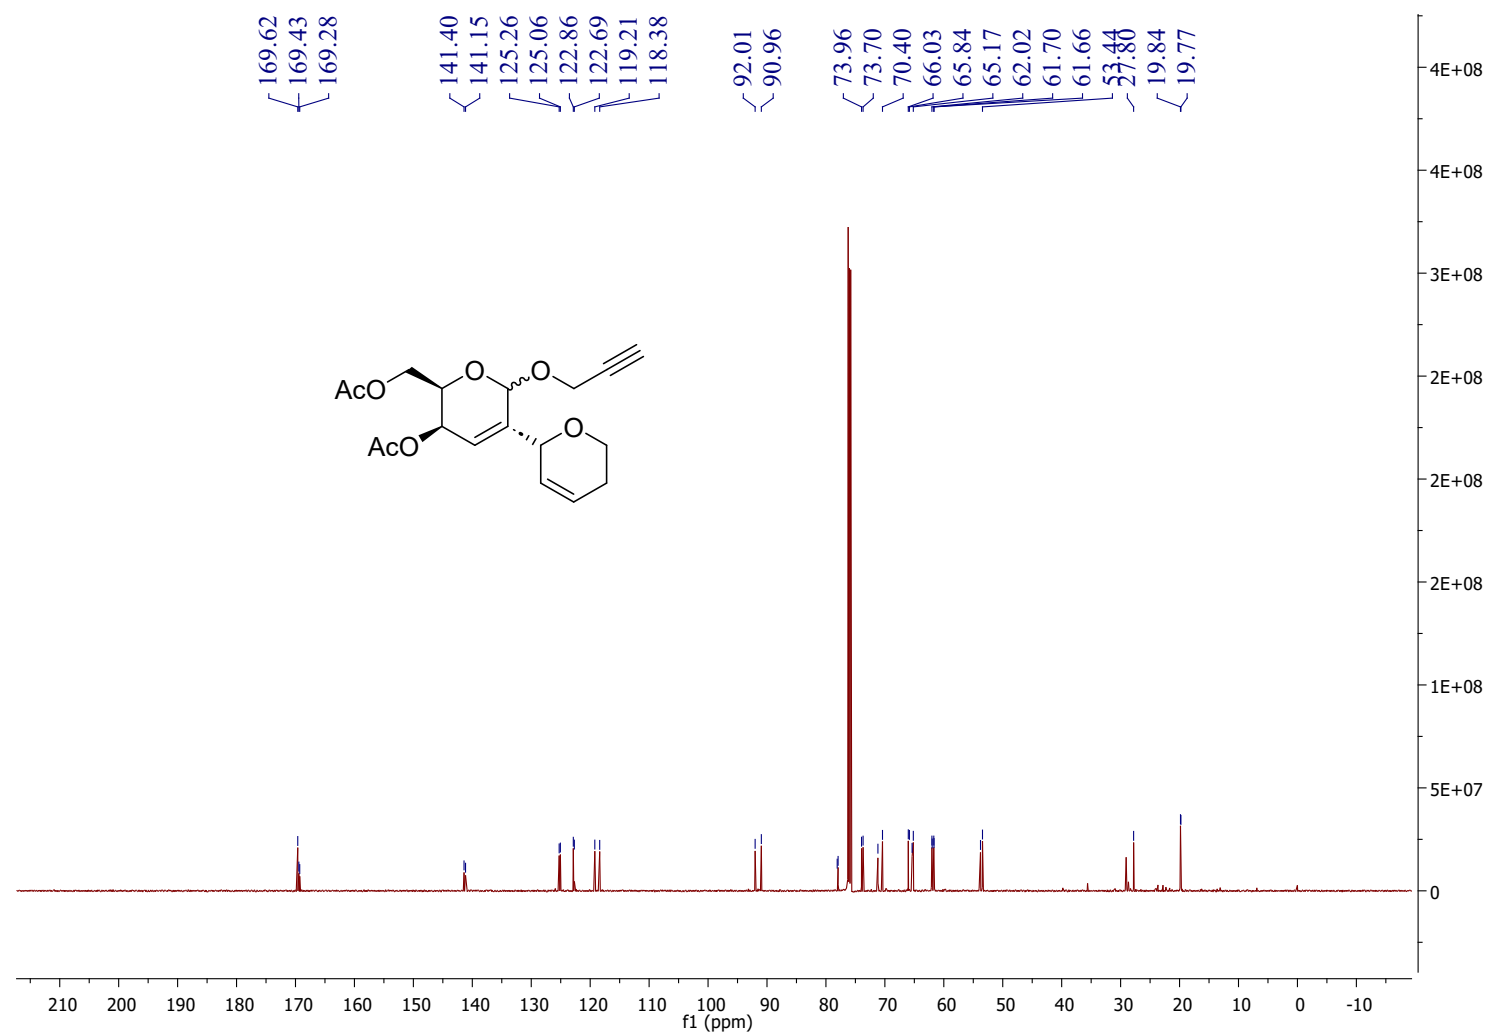

Fig.:  $^{13}\text{C}$ NMR (151 MHz,  $\text{CDCl}_3$ ) of compound 10
